# Supplementary material
Source: publisher figshare collection journal article supplement (https://acs.figshare.com/ndownloader/files/26629991)
Supplement: Supplementary file 1 [file 26629991]

## Supporting Information

### Discovery of TAK-981, a first-in-class inhibitor of Sumo Activating Enzyme for the treatment of cancer

Steven P. Langston<sup>\*1</sup>, Stephen Grossman<sup>\*1</sup>, Dylan England<sup>1</sup>, Roushan Afroze<sup>1</sup>, Neil Bence<sup>1</sup>, Douglas Bowman<sup>1</sup>, Nancy Bump<sup>1</sup>, Ryan Chau<sup>1</sup>, Bei-Ching Chuang<sup>1</sup>, Christopher Claiborne<sup>1</sup>, Larry Cohen, Kelly Connolly<sup>1</sup>, Matthew Duffey, Nitya Durvasula, Scott Freeze, Melissa Gallery, Katherine Galvin<sup>1</sup>, Jeffrey Gaulin<sup>1</sup>, Rachel Gershman<sup>1</sup>, Paul Greenspan<sup>1</sup>, Jessica Grieves<sup>1</sup>, Jianping Guo<sup>1</sup>, Nanda Gulavita<sup>1</sup>, Shumet Hailu<sup>1</sup>, Xingyue He<sup>1</sup>, Kara Hoar<sup>1</sup>, Yongbo Hu<sup>1</sup>, Zhigen Hu<sup>1</sup>, Mitsuhiro Ito<sup>2</sup>, Mi-Sook Kim<sup>1</sup>, Scott Weston Lane<sup>1</sup>, David Lok<sup>1</sup>, Anya Lublinsky<sup>1</sup>, William Mallender<sup>1</sup>, Charles McIntyre<sup>1</sup>, James Minissale<sup>1</sup>, Hirotake Mizutani<sup>1</sup>, Miho Mizutani<sup>1</sup>, Nina Molchinova<sup>1</sup>, Koji Ono<sup>2</sup>, Ashok Patil<sup>1</sup>, Mark Qian<sup>1</sup>, Jessica Riceberg<sup>1</sup>, Vaishali Shindi<sup>1</sup>, Michael D. Sintchak<sup>1</sup>, Keli Song<sup>1</sup>, Teresa Soucy<sup>1</sup>, Yana Wang<sup>1</sup>, He Xu<sup>1</sup>, Xiaofeng Yang<sup>1</sup>, Agatha Zawadzka<sup>1</sup>, Ji Zhang<sup>1</sup>, and Sai M Pulukuri<sup>1</sup>.

<sup>1</sup>Millennium Pharmaceuticals, a wholly owned subsidiary of Takeda Pharmaceuticals Company Ltd., Cambridge, Massachusetts 02139, USA.

<sup>2</sup>Takeda Pharmaceuticals, Fujisawa, Kanagawa 251-0012, Japan.

\*Email [steve.langston@takeda.com](mailto:steve.langston@takeda.com)

\*Email [Stephen.Grossman@Takeda.com](mailto:Stephen.Grossman@Takeda.com)

|                           |     |
|---------------------------|-----|
| Assay Protocols           | p1  |
| In vivo Protocols         | p4  |
| Synthetic Protocols       | P8  |
| Crystallography Protocols | p90 |

## Enzyme Assays

The E1-E2 HTRF transthiolation (HTRF) assay was run as previously described to determine the IC<sub>50</sub> value of compounds against recombinantly purified SAE, UAE, NAE. Each E1 assay was run at concentrations of ATP respective to the K<sub>m</sub> of each enzyme. SUMO1 was used as the substrate for the SAE HTRF assay.

Soucy, T. A. *et al.* An inhibitor of NEDD8-activating enzyme as a new approach to treat cancer. *Nature* **458**, 732 (2009).

ATP-PPi exchange assays were conducted as previously described. In brief, **ML-792** was serially diluted into a 96-well assay plate in 50 mM HEPES (pH 7.5), 25 mM NaCl, 5 mM MgCl<sub>2</sub>, 0.05% BSA, 0.01% Tween-20, and 1 mM TCEP, and a mixture containing 2 nM wild-type SAE, 1 mM ATP, and 0.1 mM PPi (containing 50 cpm/pmol [<sup>32</sup>P] PPi) was added. Reactions were initiated by adding 1 μM SUMO1 or SUMO2 and were incubated for 60 min at 37 °C before stopping with 5% (w/v) trichloroacetic acid (TCA) containing 10 mM PP<sub>i</sub>. The stopped reactions were transferred to a dot-blot apparatus fitted with activated charcoal filter paper presoaked in 2% TCA and 10 mM PPi and washed in the same solution. Filters were dried and exposed to an imaging plate for 1 h and quantified using a phosphoimager. After correcting for background (measured in the absence of SUMO), raw counts were converted to pmol/min of ATP using the slope of an [α-<sup>32</sup>P]-ATP standard curve. ATP-PPi exchange assays for UAE and NAE were conducted under similar assay conditions except the concentrations of UAE and Ub were 1 nM and 500 nM and the concentrations of NAE and NEDD8 were 1 nM and 160 nM in their respective assays.

Bruzzese, F. J. *et al.* Development of a charcoal paper adenosine triphosphate:pyrophosphate exchange assay: kinetic characterization of NEDD8 activating enzyme. *Analytical biochemistry* **394**, 24-29, (2009).

## SUMO immunofluorescent Assay

In the SUMO IF assay, 1 × 10<sup>4</sup> cells were plated in 100 μL of McCoy's 5A media supplemented with 10% FBS in each well of 96-well plate. All cells were maintained at approximately 37°C in a humidified cell culture chamber containing 5% CO<sub>2</sub>. Seeding time is 16 to 20 hours at 37°C in a humidified cell culture incubator containing 5% CO<sub>2</sub> before compound treatment. The compound was prepared in a series of 3-fold serial dilutions in a 96 well polypropylene U-bottom plate. The compound was diluted in McCoy's 5A media to 5-fold of final concentration of cells. 25 μL compounds in media were added to 100 μL cells prepared previously to reach final desired concentration. Positive control was 10 μM **12** and negative control was 0.25% DMSO. Treated cells were then incubated at approximately 37°C in the tissue culture incubator for 4 hours before immunofluorescent staining. The experiment was conducted with triplicate plates.

While in the SUMO washout IF assay, 2.5 × 10<sup>3</sup> cells were plated in 100 μL of McCoy's 5A media supplemented with 10% FBS in each well of the 96-well plate and incubated for 36 to 40 hours before compound treatment. Compound treatment was similar as described above. Treated

cells were then incubated at approximately 37°C in the tissue culture incubator for 2 hours before washout. The experiment was conducted with triplicate plates. Three washes of 100 µL McCoy's 5A medium supplemented with 10% FBS was conducted to remove extra compound in the well. Then 100 µL McCoy's 5A medium supplemented with 10% FBS was added to the cells. The plates were incubated for 8 hours at approximately 37°C in the tissue culture incubator before immunofluorescence staining.

### **Immunofluorescent Staining**

In both assays, compound treated cells were fixed with 4% paraformaldehyde in phosphate-buffered saline (PBS) for 15 minutes, permeated with 0.5% Triton X-100 in PBS for 15 minutes, and washed once in PBS. Fixed cells were treated with blocking reagent for 1 hour at room temperature and stained for 60 minutes at room temperature with anti-SUMO antibody (1:1250) in blocking reagent. The cells were washed two times with PBS containing 0.05% Tween-20 and then stained for 60 minutes at room temperature with Alexa 488-conjugated goat anti-mouse IgG (1:500) in blocking reagent. The cells were washed three times with PBS, then stained with a solution of DRAQ5 (a nuclei staining dye, 1:5000) in PBS and maintained in this solution for imaging.

### **Image Visualization**

Immunofluorescent cells in the SUMO IF/Washout IF studies were visualized using an Image Xpress Ultra High Content Imaging System (Molecular Devices, Inc [Sunnyvale, CA, USA]). Images from 9 to 16 pre-set locations per well were captured with a 20× objective lens. Inhibition of target was determined by measuring the redistribution of SUMO from nucleus to cytosol within HCT116 cells using MetaXpress software, Version 5.0 (Molecular Devices, Inc). The module of translocation-enhanced was applied and the parameter of “cell: inner to outer mean intensity” was used as raw readout.

### **Statistical Analysis**

The IC<sub>50</sub> value and the 95% confidence interval were calculated from a dose-response curve generated using Genedata Condoseo v11 (Genedata AG [Lexington, MA, USA]). The curves were generated using SUMO translocation percentage calculated from normalization of raw data to DMSO controls (0% inhibition) and positive control (10 µM **ML-93** 100% inhibition). The IC<sub>50</sub> values were determined from the curves, representing the concentration that produces the 50 percent inhibition.

### **Western Blot**

HCT116 cells were obtained from American Type Culture Collection and were cultured in McCoy's 5A medium supplemented with 10% fetal bovine serum. Samples were fractionated by nonreducing SDS-PAGE and Western blotted with antibodies against Sumo2/3 (Epitomics 1:1000), Nedd8 (monoclonal rabbit antibody generated by Takeda). Secondary Alexa-680-labelled antibody to rabbit/mouse IgG (Invitrogen, 1:4000 dilution) was used and the blots were imaged using the LI-COR Odyssey Infrared Imaging System.

### **CellTiter-Glo viability assay**

Cells were plated in 96-well optical bottom plates and treated with DMSO or a dilution series of compounds for 72 h. Cell viability was determined using CellTiter-Glo® Luminescent Cell Proliferation Assay (Promega Corp). Luminescence was measured using a PHERAstar multi-label counter (BMG Labtech).

### Human carbonic anhydrase enzyme assay

To determine the ability of adenosine sulfamate compounds to inhibit human carbonic anhydrase I (hCA-I) and II, (hCA-II), a fluorometric esterase assay for the known promiscuous esterase activity of the enzyme was utilized (*references below*). For this assay, the activated fluorescent ester Fluorescein Diacetate (FL-DA) was utilized to permit maximal sensitivity for monitoring inhibition by potent compounds. Chemical reagents and enzymes were purchased from Sigma Aldrich. Adenosine sulfamate compounds were added by multichannel pipette into 384-well black assay plate in 1  $\mu$ L DMSO. The buffer used for this assay was 25 mM MOPS (pH 7.5) and 0.02% Triton-X-100. A 2X stock solution for enzyme was made in assay buffer containing either 50 nM hCA-I or 5 nM hCA-II. A 2X stock solution of 50  $\mu$ M FL-DA was made in assay buffer using a freshly prepared 20 mM DMSO stock solution. Reactions were initiated by a 25  $\mu$ L addition of 2X substrate stock solution and a 25  $\mu$ L addition of 2X enzyme stock solution. Final assay (1X) conditions were 25 nM hCA-I or 2.5 nM hCA-II with 25  $\mu$ M FL-DA in assay buffer with 2% DMSO final and a serial dilution of adenosine sulfamate inhibitor starting at 10  $\mu$ M or 100  $\mu$ M depending on compound potency. For 0% inhibition control wells, a 1  $\mu$ L DMSO spot was utilized. Known hCA inhibitors Acetazolamide and Chlorothiazide were used as controls for the assay. For 100% inhibition control wells, a 1  $\mu$ L DMSO addition of 10 mM Acetazolamide, final concentration 200  $\mu$ M, was used for hCA-I reactions and a 1  $\mu$ L DMSO addition of 10 mM Chlorothiazide, final concentration 200  $\mu$ M, was used for hCA-II. Reactions were run in duplicate at room temperature on a BMG POLARstar or BMG PHERAstar multi-label counter (BMG LabTech) and read in kinetics mode. Data was analyzed using Microsoft Excel and XLFit and Genedata Condoseo software.

### Reference publications:

Pocker, Y. and Stone J.T. (1967) The catalytic versatility of erythrocyte carbonic anhydrase. 3. Kinetic studies of the enzyme-catalyzed hydrolysis of p-nitrophenyl acetate. *Biochemistry* **6** (3), 668-678.

Elleby, B, Sjöblom, S., and Lindskog, S. (1999) Changing the efficiency and specificity of the esterase activity of human carbonic anhydrase II by site-specific mutagenesis. *Eur. J. Biochem.* **262**, 516-521.

Gould, S.M. and Tawfik, D.S. (2005) Directed evolution of the promiscuous esterase activity of carbonic anhydrase II. *Biochemistry* **44** (14), 5444-5452.

### Mouse Models

All animal studies were conducted under the approval of the Takeda Oncology Institutional Animal Care and Use Committee and complied with all relevant ethical regulations. Mice were maintained in a specific pathogen-free facility in accordance with American Association for Laboratory Animal Science guidelines. To establish the HCT-116 model, six to twelve-week-old female NCr nude mice (Taconic Farms, Inc.) were inoculated subcutaneously along the right flank with  $1.0 \times 10^6$  HCT-116 cells (ATCC CCL-247) cultured according to vendor recommendations and re-suspended for injection in 50% McCoy's 5a Medium/50% Matrigel™ [BD Biosciences (Bedford, MA)]. To establish the OCI-Ly10 model, six to twelve-week-old

female CB17 SCID mice (Taconic Farms, Inc.) were inoculated subcutaneously along the right flank with  $4.0 \times 10^6$  OCI-Ly10 cells (from National Cancer Institute) cultured in IMDM media supplemented with 20% fetal bovine serum and re-suspended for injection in 50% Iscove's Modified Dulbecco's Medium/50% Matrigel™ [BD Biosciences (Bedford, MA)]. Tumors measurements were calculated with Vernier calipers across 2 dimensions and volumes were calculated using the formula  $(V) = W^2 \times L/2$ , where W and L are the width and length of the tumor, respectively.

### **Sample Collection and Handling**

For plasma collection, approximately 500 µL of whole blood was obtained via cardiac puncture, placed into tubes coated with dipotassium ethylenediaminetetraacetic acid (K2EDTA) to prevent clotting and centrifuged at 10,000 rpm for 5 minutes. Approximately 200 µL of plasma was then transferred into 1.4-mL sterile Micronic non-coded push cap U-bottom tubes and capped with a pierceable thermo plastic elastomer cap (MP32022; MP53007 [Nova Biostorage + (Canonsburg, PA, USA)]), snap frozen on dry ice and stored frozen at approximately  $-80^\circ\text{C}$ . Tumor samples were excised from the mouse and cut into 2 pieces. One piece was placed into 2 mL FastPrep tubes (Cat #5076-400 [MP Biomedicals (Santa Ana, CA, USA)]), snap frozen on dry ice and stored frozen at approximately  $-80^\circ\text{C}$  for PK analysis. One piece was thinly sliced, placed into a bar-coded histology cassette and submerged in 10% neutral buffered formalin for a minimum of 24 hours. Tumors were embedded in paraffin cut into 5-micron sections and used for IHC staining for pharmacodynamic analysis. Samples of plasma and tumor were transferred to the Bioanalysis group at Takeda for PK analysis.

### **Plasma and Tumor Processing for Liquid Chromatography With Tandem Mass Spectrometry**

A protein precipitation extraction method was used for preparation of plasma samples. 20 µL of plasma was diluted with 380 µL of acetonitrile (ACN) with 0.1% formic acid (FA). The sample was mixed, and then centrifuged at 3000 g for 10 minutes, and the supernatant analyzed by LC/MS/MS. Frozen tumor tissues were homogenized with water using the MP FastPrep®-24 bead homogenizing system (MP Biomedicals). The final diluted tumor homogenate was processed and analyzed as described for plasma samples.

### **Quantitation of Compound Using a Liquid Chromatography With Tandem Mass Spectrometry Method**

The method was established on a API-5500 mass spectrometer (SCIEX [Concord, Ontario, Canada]) equipped with a Shimadzu UFLC (ultra-fast liquid chromatography) system and autosampler. Concentrations of the SUMO inhibitor in mouse plasma were determined by a liquid chromatography UFLC system with a tandem mass spectrometry based method, operated in the positive ionization mode using a turbo ion spray. Multiple-reaction monitoring was used for detection of the compound.

The calibration curve standards were prepared from a dimethyl sulfoxide stock (1 mg/mL) and serially diluted with ACN with 0.1% FA. The dynamic range for the curve was 0.050-5.0 µM (or 25.0 µM if the curve was still linear). In brief, an aliquot of 20 µL of plasma samples or standards was transferred into a True Taper™ 2 mL Square 96-well plate with 100 µL tapered reservoir (Analytical Sales & Service, Inc. [Pompton Plains, NJ, USA]). 380 µL of ACN with

0.1% FA, (which contained carbutamide at a concentration of approximately 100 ng/mL), was added to the samples to either precipitate the proteins from the plasma or dilute the calibration curve standards. The carbutamide in the samples was used to ensure the reproducibility of the autosampler injections. The sample wells were mixed (aspirated and dispensed) several times with a multi-channel pipette and then centrifuged at 3000 rpm for 10 minutes. The resulting supernatant was then injected onto an LC/MS/MS system and the compound concentrations were determined by a LC/MS/MS based assay.

### **Measuring SUMO2/3 Conjugates by IHC**

Sumo2/3 expression was measured via IHC on formalin fixed paraffin embedded tumors using an anti-SUMO2/3 rabbit monoclonal antibody [EPR300(2)] (Abcam [Cambridge, MA, USA] [Catalog No 109196, Lot GR96828-7]) at a 1:1,000 dilution. Leica BOND™ Polymer Refine Detection kit (Leica Biosystems [Buffalo Grove, IL, USA] [Catalog No DS9800, Lot# 43319]) was used for SUMO 2/3 detection. Staining was performed on the Leica BOND™ RX automated machine (Leica Biosystems [Buffalo Grove, IL, USA]). SUMO 2/3 expression was visualized by 3, 3'-diaminobenzidine (DAB) staining. After staining, whole slide images were captured using an Aperio Scanscope® XT (Aperio ePathology Solutions [Vista, CA, USA]). Quantitative analysis was done using a Definiens Tissue Studio® (Definiens Tissue Studio image analysis software [Cambridge, MA, USA]) designed to measure DAB staining. Data are represented as the percentage of SUMO2/3 positive nuclei relative to the total number of nuclei in the viable tumor region. The mean result of the 3 tumors per group was compared to the mean of the vehicle group, to determine the mean percent inhibition of SUMO2/3 conjugates at each timepoint.

### **Measuring SUMO-Compound Adduct by IHC**

For detection of SUMO-**MIL-792** adduct, the antibody MIL-79 (Epitomics [Cambridge, MA, USA] [subclone MIL-79-84-6]) was used at a 1:8000 dilution. IHC assays for MIL-79 were carried using a Ventana XT Staining Module (Ventana Medical Systems). Data are shown as a percentage of MIL-79 positive area within the viable tumor area.

For detection of SUMO-TAK-981 adduct, the antibody MIL-113 (Epitomics [Cambridge, MA, USA] [subclone MIL-113-67-2]) was used at a 1:30,000 dilution. Leica BOND™ Polymer Refine Detection kit (Leica Biosystems [Buffalo Grove, IL, USA] [Catalog No DS9800, Lot# 43319]) was used for MIL113 detection. IHC assays for MIL-113 were carried out using a Leica BOND™ RX automated stainer (Leica Biosystems [Buffalo Grove, IL, USA]). MIL-113 was visualized by 3, 3'-diaminobenzidine (DAB) staining. After staining, whole slide images were captured using an Aperio Scanscope® XT (Aperio ePathology Solutions [Vista, CA, USA]). Data analysis was performed by using a Definiens Tissue Studio® (Definiens [Cambridge, MA, USA]) designed to measure DAB staining. Data are shown as a percentage of MIL-113 positive area within the viable tumor area.

### **Measuring SUMO-Compound Adduct by Mass Spectrometry**

To quantify the amounts of SAE and Sumo–compound **ML-792** adducts in biological samples subjected to treatment with **ML-792**, an internal standard sample for mass spectrometric quantification was prepared using the purified heavy SILAC-labeled SAE (SAE\*) and <sup>13</sup>C- and <sup>15</sup>N-labeled Sumo1 and Sumo2 (Sumo1\* and Sumo2\*). In detail, 2 μM SAE\*, 1 μM Sumo1\* or 1 μM Sumo2\*, and 2 μM **ML-792** were mixed with 150 μM ATP and 10 mM MgCl<sub>2</sub> in 20 mM Tris buffer pH 8.0 at room temperature for 1 h. The reaction was quenched by EDTA at final concentration of 30 mM. The conversion of free Sumo1\* or Sumo2\* to Sumo\*–**ML-792** adducts was confirmed to be complete by intact protein mass spectrometric analysis as described previously (Nature Chemical Biology, 2017 November 13: 1164-71). The internal standard solution was stored in aliquots at –80 °C until use.

To quantify the absolute amounts of SAE and Sumo–**ML-792** adducts, xenograft tissue lysates from **ML-792** treated animals were mixed with known amounts of the internal standard (SAE\* and Sumo\*–**ML-792**) and NuPage 4 × LDS sample buffer (Invitrogen) containing reducing agent (Invitrogen) and were resolved by SDS-PAGE on a NuPage 4–12 % gel (Invitrogen). As described previously (Cell Biochemistry and Biophysics. 2013 Sep 67(1): 139-47.), SAE subunits gel fractions were excised and an in-gel digestion by trypsin (Roche) was performed. While Sumo fraction was excised, and in-gel digested by the combination of chymotrypsin (Roche) and Glu-C (Roche). After digestion, 20 μl solution containing 1 % formic acid (Sigma-Aldrich) and 5 % acetonitrile (J.T. Baker) (v/v) was added to each digest and vortexed at room temperature for 5 min. After centrifugation, the supernatant was subjected to NanoLC–MS/MS analysis for quantification of SAE and SUMO-adducts. The SAE amount in each sample was calculated from the ratio of the chromatogram peak areas of the light and SILAC heavy labeled peptides of SAE as described previously (Cell Biochemistry and Biophysics. 2013 Sep 67(1): 139-47). The Sumo1-**ML-792** adduct amount in each sample was calculated from the ratio of the peak areas of QTGG-**ML-792** to Q\*T\*G\*G\*-**ML-792** in the chromatogram. The Sumo2/3-**ML-792** adduct amount was calculated from the ratio of the peak areas of QQQTGG-**ML-792** to Q\*Q\*Q\*T\*G\*G\*-**ML-792** in the chromatogram. Finally, the Sumo-adducts to SAE molar ratios were calculated to represent the SAE pathway inhibition extent.

The procedures to quantify the amounts of SAE and Sumo-adducts in biological samples were reproduced for compounds **ML-93** and TAK-981.

#### Reference publications:

Probing the roles of SUMOylation in cancer cell biology by using a selective SAE inhibitor.

Nature Chemical Biology, 2017 November 13: 1164-71

Absolute Quantification of E1, Ubiquitin-like Proteins and Nedd8-MLN4924 Adduct by Mass Spectrometry. Cell Biochemistry and Biophysics. 2013 Sep 67(1): 139-47.

#### Antitumor activity against the HCT-116 (colon carcinoma) model

To determine the antitumor activities of compounds **ML-792**, **ML-93**, and TAK-981 in HCT-116 tumor-bearing mice, 6-10 week-old female NCr nude mice were inoculated with HCT-116 cells to establish the model as previously described. When the mean tumor volume reached approximately 200 mm<sup>3</sup>, animals were randomized into treatment groups (n=8/group) and dosed SC (**ML-792**, **ML-93**) or IV (TAK-981) at the doses and schedules indicated. Compounds were prepared fresh weekly and stored at 4 degrees. Dosing volume for all compounds was 200 μL. Tumor size and body weight were measured twice weekly. Animals were monitored daily for signs of toxicity.

### Antitumor activity against OCI-Ly10 (DLBCL) model

To determine the antitumor activities of **ML-792**, **ML-93** and TAK-981 in OCI-Ly10 tumor-bearing mice, 7-10 week-old female CB17 SCID mice were inoculated with OCI-Ly10 cells to establish the model as previously described. When the mean tumor volume reached approximately 200 mm<sup>3</sup>, animals were randomized into treatment groups (n=8/group) and dosed SC (**ML-792**, **ML-93**) or IV (TAK-981) at the doses and schedules indicated. Compounds were prepared fresh weekly and stored at 4 degrees. Dosing volume for all compounds was 200  $\mu$ L. Tumor size and body weight were measured twice weekly. Animals were monitored daily for signs of toxicity.

### Procedures for the syntheses of compounds in Table 1

#### Synthesis of intermediate I-3

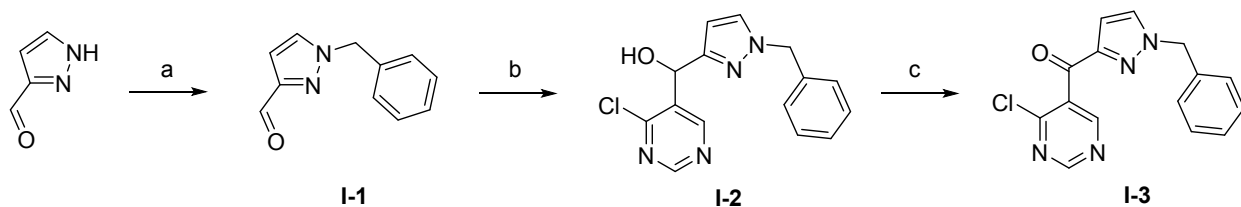

Reagents: (a) Benzylbromide, Cs<sub>2</sub>CO<sub>3</sub>, DMF, rt, 1 h, 77%; (b) 4-chloro-5-iodopyrimidine, *n*-BuLi, THF, -78 °C, 0.5 h, 85%; (c) MnO<sub>2</sub>, DCM, rt, 15 h, 91%.

**Step 1: 1-Benzyl-1H-pyrazole-3-carbaldehyde (I-1).** A 100 mL round bottom flask was charged with 1-pyrazole-3-carbaldehyde (250 mg, 2.60 mmol), Cs<sub>2</sub>CO<sub>3</sub> (2.12 g, 6.50 mmol), and DMF (10 mL). To the suspension was added benzyl bromide (0.33 mL, 2.70 mmol), and the reaction was stirred for 1 h. The reaction mixture was poured into water (50 mL) and the mixture was extracted with EtOAc (50 mL) three times. The combined organic layers were washed with brine, dried over Na<sub>2</sub>SO<sub>4</sub>, filtered, and concentrated in vacuo. The residue was purified on silica gel to provide **I-1** (372 mg, 77%). <sup>1</sup>H NMR (CDCl<sub>3</sub>)  $\delta$  10.01–9.98 (m, 1H), 7.42 (d, 1H, *J* = 2.3 Hz), 7.41–7.32 (m, 3H), 7.28–7.23 (m, 2H), 6.82 (d, 1H, *J* = 2.4 Hz), 5.40 (s, 2H).

**Step 2: (1-Benzyl-1H-pyrazol-3-yl)(4-chloropyrimidin-5-yl)methanol (I-2).** 4-Chloro-5-iodopyrimidine (300 mg, 1.25 mmol) was weighed into a 100 mL 2 necked round bottom flask and the flask was purged with argon. This starting material was dissolved in THF (10 mL) and the solution was cooled to -78 °C. To the solution was added *n*-BuLi (2.50 M in hexane; 1.0 mL, 2.5 mmol) at -78 °C and then the mixture was stirred for 30 min. To this mixture was added dropwise a solution of 1-benzyl-1H-pyrazole-3-carbaldehyde (211 mg, 1.1 mmol) in THF (4 mL), and the resulting mixture was stirred for 30 min. The reaction was quenched by addition of saturated NH<sub>4</sub>Cl (50 mL) and extracted with EtOAc (50 mL) four times. The combined organic layers were washed with brine, dried over Na<sub>2</sub>SO<sub>4</sub>, filtered, and concentrated in vacuo. The



residue was purified on silica gel to provide **I-2** (304 mg, 85%) as a light-yellow oil. LCMS (FA):  $m/z$  = 301.4 (M+H).

**Step 3: (1-Benzyl-1H-pyrazol-3-yl)(4-chloropyrimidin-5-yl)methanone (I-3).** To a solution of (1-benzyl-1H-pyrazol-3-yl)(4-chloropyrimidin-5-yl)methanol (285 mg, 0.95 mmol) in DCM (10 mL) was added  $\text{MnO}_2$  (0.82 g, 9.5 mmol), and the mixture was stirred for 15 h at rt. The reaction was filtered through a pad of celite and the residual solid was washed with DCM several times. The filtrate was concentrated in vacuo and the residue was purified on silica gel to give **I-3** (257 mg, 91%) as a colorless solid.  $^1\text{H}$  NMR ( $\text{CDCl}_3$ )  $\delta$  9.09 (s, 1H) 8.90 (s, 1H) 7.45 (d, 1H,  $J$  = 2.5 Hz) 7.32–7.41 (m, 3H) 7.22 (m, 2H) 7.02 (d, 1H,  $J$  = 2.5 Hz) 5.33 (s, 2H); LCMS (FA):  $m/z$  = 299.4 (M+H).

## Synthesis of 2

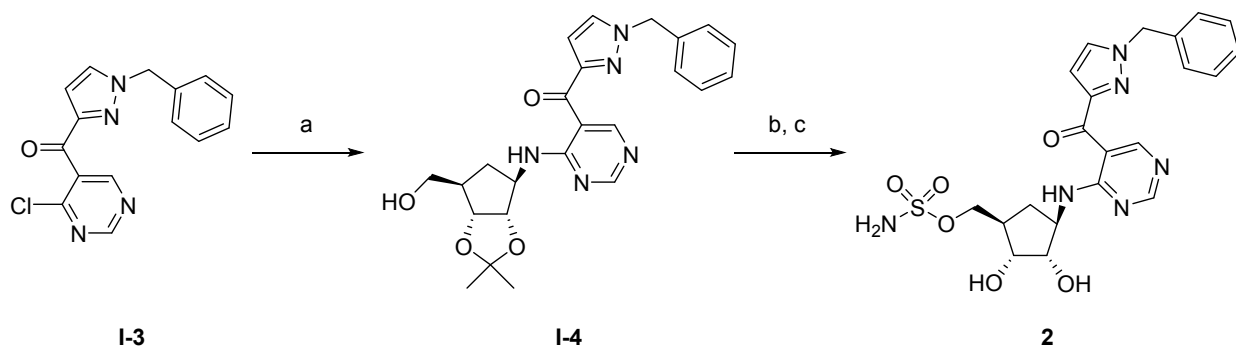

Reagents: (a) (1R,2S,3R,4R)-1-amino-2,3-(isopropylidenyl)dihydroxy-4-hydroxymethyl cyclopentane, DIPEA, 1-BuOH, 105 °C, 2 h, 92%, (b) chlorosulfonamide, DMF, 10 min, 81%; (c) conc. HCl, THF,  $\text{H}_2\text{O}$ , rt, 89%.

**Step 1: (1-Benzyl-1H-pyrazol-3-yl)(4-((3aS,4R,6R,6aR)-6-(hydroxymethyl)-2,2-dimethyltetrahydro-3aH-cyclopenta[d][1,3]dioxol-4-yl)amino)pyrimidin-5-yl)methanone (I-4).** (1-Benzyl-1H-pyrazol-3-yl)(4-chloropyrimidin-5-yl)methanone (**I-3**, 120 mg, 0.40 mmol) and (1R,2S,3R,4R)-1-amino-2,3-(isopropylidenyl)dihydroxy-4-hydroxymethyl cyclopentane (90 mg, 0.48 mmol) (for synthesis of this starting material see: Claiborne, C. F. et al. PCT Application Publication WO2008/019124) were weighed into a reaction vessel. To this mixture was added 1-BuOH (2.4 mL) and *N,N*-diisopropylethylamine (0.14 mL, 0.80 mmol) and the tube was sealed under an atmosphere of argon. The resulting mixture was stirred for 2 h at 105 °C. After cooling to rt, the reaction was concentrated in vacuo. To this residue was added water (30 mL) and the resulting mixture was extracted with EtOAc (50 mL) four times. The combined organic layers were washed with brine, dried over  $\text{Na}_2\text{SO}_4$ , filtered, and concentrated in vacuo. The residue was purified on silica gel to give **I-4** (175 mg, 92%) as a colorless solid. LCMS (FA):  $m/z$  = 450.5 (M+H).

**Step 2: [(1R,2R,3S,4R)-4-((5-((1-Benzyl-1H-pyrazol-3-yl)carbonyl)pyrimidin-4-yl)amino)-2,3-dihydroxycyclopentyl]methyl sulfamate (2).**

To a solution of (1-benzyl-1H-pyrazol-3-yl)(4-((3aS,4R,6R,6aR)-6-(hydroxymethyl)-2,2-dimethyltetrahydro-3aH-cyclopenta[d][1,3]dioxol-4-yl)amino)pyrimidin-5-yl)methanone (162

mg, 0.36 mmol) in DMF (2.0 mL) was added chlorosulfonamide (83 mg, 0.72 mmol) at rt, and the mixture was stirred for 10 min. The reaction was quenched by addition of saturated NaHCO<sub>3</sub> (30 mL) and extracted with EtOAc (50 mL) three times. The combined organic layers were dried over Na<sub>2</sub>SO<sub>4</sub>, filtered, and concentrated in vacuo. The residue was purified on silica gel to give the sulfamate intermediate [(162 mg, 81%); LCMS (FA):  $m/z$  = 529.5 (M+H)] which was then dissolved in THF (2.0 mL). To this solution was added water (2 mL) and conc. HCl (0.35 mL, 4.2 mmol) at rt, and the mixture was stirred for 2 h. The reaction was quenched by addition of saturated NaHCO<sub>3</sub> (30 mL) and extracted with EtOAc (50 mL) four times. The combined organic layers were dried over Na<sub>2</sub>SO<sub>4</sub>, filtered, and concentrated. The residue was purified on silica gel to give **2** (128 mg, 89%). <sup>1</sup>H NMR (DMSO-*d*<sub>6</sub>) δ 9.47 (s, 1H), 9.07 (d, 1H, *J* = 7.4 Hz), 8.61 (s, 1H), 8.07 (d, 1H, *J* = 2.4 Hz), 7.45 (s, 2H), 7.41–7.26 (m, 5H), 6.92 (d, 1H, *J* = 2.4 Hz), 5.51 (s, 2H), 4.92 (d, 1H, *J* = 6.0 Hz), 4.74 (d, 1H, *J* = 4.8 Hz), 4.50–4.41 (m, 1H), 4.07 (dd, 1H, *J* = 9.7, 6.1 Hz), 3.98 (dd, 1H, *J* = 9.7, 6.6 Hz), 3.79 (dd, 1H, *J* = 13.0, 5.8 Hz), 3.71 (dd, 1H, *J* = 9.5, 4.8 Hz), 2.38–2.28 (m, 1H), 2.25–2.15 (m, 1H), 1.15 (dt, 1H, *J* = 12.9, 8.7 Hz); LCMS (FA):  $m/z$  = 489.5 (M+H); HRMS  $m/z$  [M+H]<sup>+</sup> calcd for C<sub>21</sub>H<sub>25</sub>N<sub>6</sub>O<sub>6</sub>S 489.1556, obsd 489.1558.

### Synthesis of cyclopentane intermediate I-8

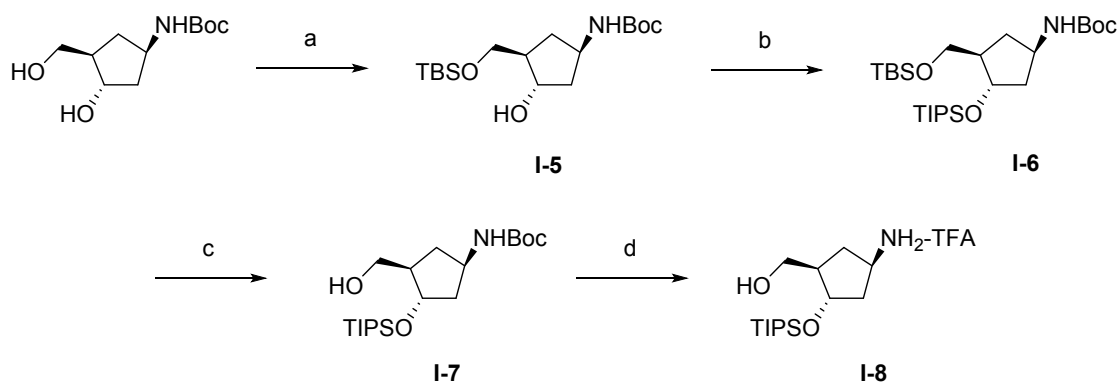

Reagents: (a) TBSCl, imidazole, DMF, DCM, rt, 12 h, 87%; (b) TIPSCl, imidazole, DMF, rt, 61 h, 93%; (c) 1% HCl in EtOH, EtOH, 4 °C for 13 h and rt for 4 h, 93%; (d) TFA, 5 min, rt, 100%.

#### Step 1: *tert*-Butyl [(1*R*,3*R*,4*S*)-3-({*tert*-butyl(dimethyl)silyl}oxy)methyl)-4-

hydroxycyclopentyl]carbamate (**I-5**). A solution of *tert*-butyl [(1*R*,3*S*,4*R*)-3-hydroxy-4-(hydroxymethyl)cyclopentyl]carbamate (4.0 g, 17 mmol) (for synthesis of starting material see: Ober, M. et al. *J. Am. Chem. Soc.* **2005**, 127, 18143-18149) and imidazole (1.4 g, 21 mmol) in DMF (40 mL) was diluted with DCM (200 mL) and cooled in an ice/water bath. TBSCl (2.9 g, 19 mmol) was added as a solution in DCM (40 mL). The reaction was allowed to warm to ambient temperature and stirred overnight. The reaction was quenched by addition of water (150 mL) and the mixture was transferred to separatory funnel. The organic layer was collected and the residual water layer was extracted with DCM (150 mL) twice. The combined organic layers were dried over Na<sub>2</sub>SO<sub>4</sub>, filtered, and concentrated. The residue was purified on silica gel to provide **I-5** (5.21 g, 87%). <sup>1</sup>H NMR (CDCl<sub>3</sub>) δ 4.73 (s, 1H), 4.20–4.05 (m, 2H), 3.81 (dd, 1H, *J* =

9.8, 4.2 Hz), 3.54 (dd, 1H,  $J = 9.7, 7.1$  Hz), 2.33–2.10 (m, 2H), 2.05–1.79 (m, 3H), 1.43 (s, 9H), 1.20–1.08 (m, 1H), 0.90 (s, 9H), 0.08 (s, 6H). LCMS (FA):  $m/z = 346.6$  (M+H).

**Step 2: *tert*-Butyl {(1*R*,3*R*,4*S*)-3-([*tert*-butyl(dimethyl)silyl]oxy)methyl)-4-[(triisopropylsilyl)oxy]cyclopentyl}carbamate (I-6).** To a solution of *tert*-butyl [(1*R*,3*R*,4*S*)-3-([*tert*-butyl(dimethyl)silyl]oxy)methyl)-4-hydroxycyclopentyl]carbamate (3.8 g, 11 mmol) in DMF (57 mL) under an atmosphere of argon was added imidazole (2.25 g, 33 mmol) followed by TIPSCl (4.7 mL, 22 mmol) at rt, and the mixture was stirred for 61 h. The reaction was quenched by addition of saturated NH<sub>4</sub>Cl (150 mL) and extracted with EtOAc (200 mL) five times. The combined organic layers were washed with brine, dried over Na<sub>2</sub>SO<sub>4</sub>, filtered, and concentrated in vacuo. The residue was purified on silica gel to afford **I-6** (5.13 g, 93%) as a colorless oil. <sup>1</sup>H NMR (CDCl<sub>3</sub>)  $\delta$  4.90 (s, 1H), 4.35–4.20 (m, 1H), 4.19–3.99 (m, 1H), 3.75–3.44 (m, 2H), 2.37–2.17 (m, 1H), 2.03 (s, 1H), 1.96–1.69 (m, 2H), 1.43 (s, 9H), 1.31–1.13 (m, 1H), 1.04 (s, 21H), 0.90 (s, 9H), 0.06 (s, 6H). LCMS (FA):  $m/z = 402.6$  (M+H) - Boc.

**Step 3: *tert*-Butyl {(1*R*,3*R*,4*S*)-3-(hydroxymethyl)-4-[(triisopropylsilyl)oxy]cyclopentyl}carbamate (I-7).** To a solution of *tert*-butyl {(1*R*,3*R*,4*S*)-3-([*tert*-butyl(dimethyl)silyl]oxy)methyl)-4-[(triisopropylsilyl)oxy]cyclopentyl}carbamate (**I-6**, 535 mg, 0.91 mmol) in EtOH (9.7 mL) was added 1% HCl in EtOH (9.7 mL, 1.2 mmol) at rt, and the mixture was allowed to stand at 4 °C for 13 h. The reaction was then stirred for 4 h at rt. The reaction was quenched by addition of saturated NaHCO<sub>3</sub> (50 mL) and extracted with DCM (50 mL) three times. The combined organic layers were dried over Na<sub>2</sub>SO<sub>4</sub>, filtered, and concentrated in vacuo. The residue was purified on silica gel to give **I-7** (327 mg, 93%) as a colorless oil. <sup>1</sup>H NMR (CDCl<sub>3</sub>)  $\delta$  4.65 (s, 1H), 4.22 (dd, 1H,  $J = 10.9, 5.1$  Hz), 4.19–4.05 (m, 1H), 3.72–3.58 (m, 2H), 2.41–2.27 (m, 1H), 2.13–2.04 (m, 1H), 2.00 (m, 1H), 1.80–1.63 (m, 2H), 1.44 (s, 9H), 1.23–1.09 (m, 1H), 1.06 (s, 21H).

**Step 4: {(1*R*,2*S*,4*R*)-4-Amino-2-[(triisopropylsilyl)oxy]cyclopentyl}methanol-TFA (I-8).** A 250 mL round bottom flask was charged with *tert*-butyl {(1*R*,3*R*,4*S*)-3-(hydroxymethyl)-4-[(triisopropylsilyl)oxy]cyclopentyl}carbamate (1.0 g, 2.6 mmol). To the reaction vessel was added TFA (6.5 mL, 84 mmol) at rt, and the mixture was stirred for 5 min. To the mixture was added toluene (50 mL) and the mixture was concentrated in vacuo. This was repeated twice more to remove TFA and the resulting residue was dried under high vacuum to give {(1*R*,2*S*,4*R*)-4-amino-2-[(triisopropylsilyl)oxy]cyclopentyl}methanol-TFA (**I-8**, 1.31 g, 100%) as a colorless oil. LCMS (FA):  $m/z = 288.6$  (M+H).

## Synthesis of 3

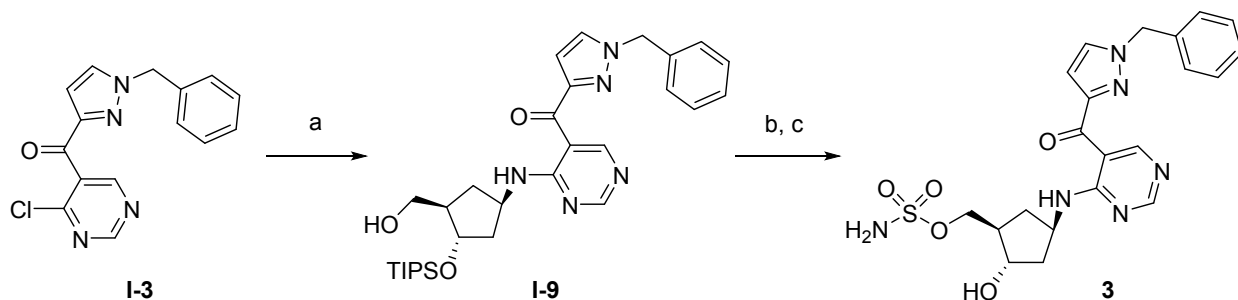

Reagents: (a) **I-8**,  $\text{K}_2\text{CO}_3$ , DMF, rt, 13 h, 75%; (b) chlorosulfonamide, DMF, rt, 20 min, 80%; (c) 4N HCl, THF, rt, 1 h, 95%.

**Step 1: (1-Benzyl-1H-pyrazol-3-yl)[4-((1R,3R,4S)-3-(hydroxymethyl)-4-[(triisopropylsilyl)oxy]cyclopentyl]amino)pyrimidin-5-yl]methanone (**I-9**).**

To a solution of {(1R,2S,4R)-4-amino-2-[(triisopropylsilyl)oxy]cyclopentyl}methanol-TFA (**I-8**, 1.04 g, 2.58 mmol) in DMF (20 mL) was added  $\text{K}_2\text{CO}_3$  (1.1 g, 7.7 mmol) followed by (1-benzyl-1H-pyrazol-3-yl)(4-chloropyrimidin-5-yl)methanone (**I-3**, 0.85 g, 2.8 mmol) at rt, and the mixture was stirred for 13 h. The reaction was then concentrated in vacuo. To the residue was added water (100 mL) and the mixture was extracted with EtOAc (100 mL) three times. The combined organic layers were washed with brine, dried over  $\text{Na}_2\text{SO}_4$ , filtered, and concentrated in vacuo. The residue was purified on silica gel to give **I-9** (1.08 g, 75%) as a colorless oil.  $^1\text{H}$  NMR ( $\text{CDCl}_3$ )  $\delta$  9.66 (s, 1H), 9.25 (br d, 1H,  $J = 7.3$  Hz), 8.64 (s, 1H), 7.42 (d, 1H,  $J = 2.5$  Hz), 7.40–7.31 (m, 3H), 7.28–7.23 (m, 2H), 6.89 (d, 1H,  $J = 2.3$  Hz), 5.39 (s, 2H), 4.87–4.76 (m, 1H), 4.32 (q, 1H,  $J = 4.7$  Hz), 3.70 (t, 2H,  $J = 5.4$  Hz), 2.50 (td, 1H,  $J = 13.1, 8.0$  Hz), 2.24–2.14 (m, 2H), 1.92–1.81 (m, 2H), 1.32 (td, 1H,  $J = 13.1, 8.1$  Hz), 1.11–1.03 (m, 21H). LCMS (FA):  $m/z = 550.7$  (M+H).

**Step 2: [(1R,2S,4R)-4-((5-[(1-Benzyl-1H-pyrazol-3-yl)carbonyl]pyrimidin-4-yl)amino)-2-hydroxycyclopentyl]methyl sulfamate (**3**).**

To a solution of (1-benzyl-1H-pyrazol-3-yl)[4-((1R,3R,4S)-3-(hydroxymethyl)-4-[(triisopropylsilyl)oxy]cyclopentyl]amino)pyrimidin-5-yl]methanone (1.0 g, 1.8 mmol) in DMF (30 mL) was added chlorosulfonamide (650 mg, 5.6 mmol) at rt, and the mixture was stirred for 20 min. The reaction was quenched by addition of saturated  $\text{NaHCO}_3$  (100 mL) and water (50 mL). The mixture was extracted with EtOAc (150 mL) three times, and the combined organic layers were dried over  $\text{Na}_2\text{SO}_4$ , filtered, and concentrated in vacuo. The residue was purified on silica gel to give the sulfamate intermediate [(0.91 g, 80%); LCMS (FA):  $m/z = 629.7$  (M+H)] which was then dissolved in THF (20 mL) and HCl (4 M in water; 20 mL, 80 mmol) was added at rt. This mixture was stirred for 1 h and then quenched by addition of saturated  $\text{NaHCO}_3$  (150 mL) and extracted with EtOAc (200 mL) four times. The combined organic layers were dried over  $\text{Na}_2\text{SO}_4$ , filtered, and concentrated in vacuo. To the residue was added DCM and the resulting suspension was filtered through a glass frit funnel and the residual solid was washed with DCM twice. The filtrate was concentrated in vacuo and the residue was purified on silica gel. The purification product and solid from filtration were combined to give **3** (652 mg, 95%) as a colorless solid.  $^1\text{H}$  NMR ( $\text{DMSO}-d_6$ )  $\delta$  9.46 (s, 1H), 9.00 (d, 1H,  $J = 7.5$  Hz), 8.62 (s, 1H), 8.07 (d, 1H,  $J = 2.4$  Hz), 7.45 (s, 2H), 7.41–7.25 (m, 5H), 6.90 (d, 1H,  $J = 2.4$  Hz), 5.50 (s, 2H), 4.92 (d, 1H,  $J = 4.6$  Hz), 4.76–4.64 (m, 1H), 4.10 (dd, 1H,  $J = 9.7, 5.9$  Hz), 4.01–3.92 (m, 2H), 2.41–2.30 (m, 1H), 2.19–2.07 (m, 1H), 2.00 (ddd, 1H,  $J = 11.7, 7.7, 3.8$  Hz), 1.83–1.72 (m, 1H), 1.28

(dt, 1H,  $J = 12.9, 9.2$  Hz). LCMS (FA):  $m/z = 473.5$  (M+H). HRMS  $m/z$  [M+H]<sup>+</sup> calcd for C<sub>21</sub>H<sub>25</sub>N<sub>6</sub>O<sub>5</sub>S 473.1607, obsd 473.1608.

## Procedures for the syntheses of compounds in Table 2

### Synthesis of 4

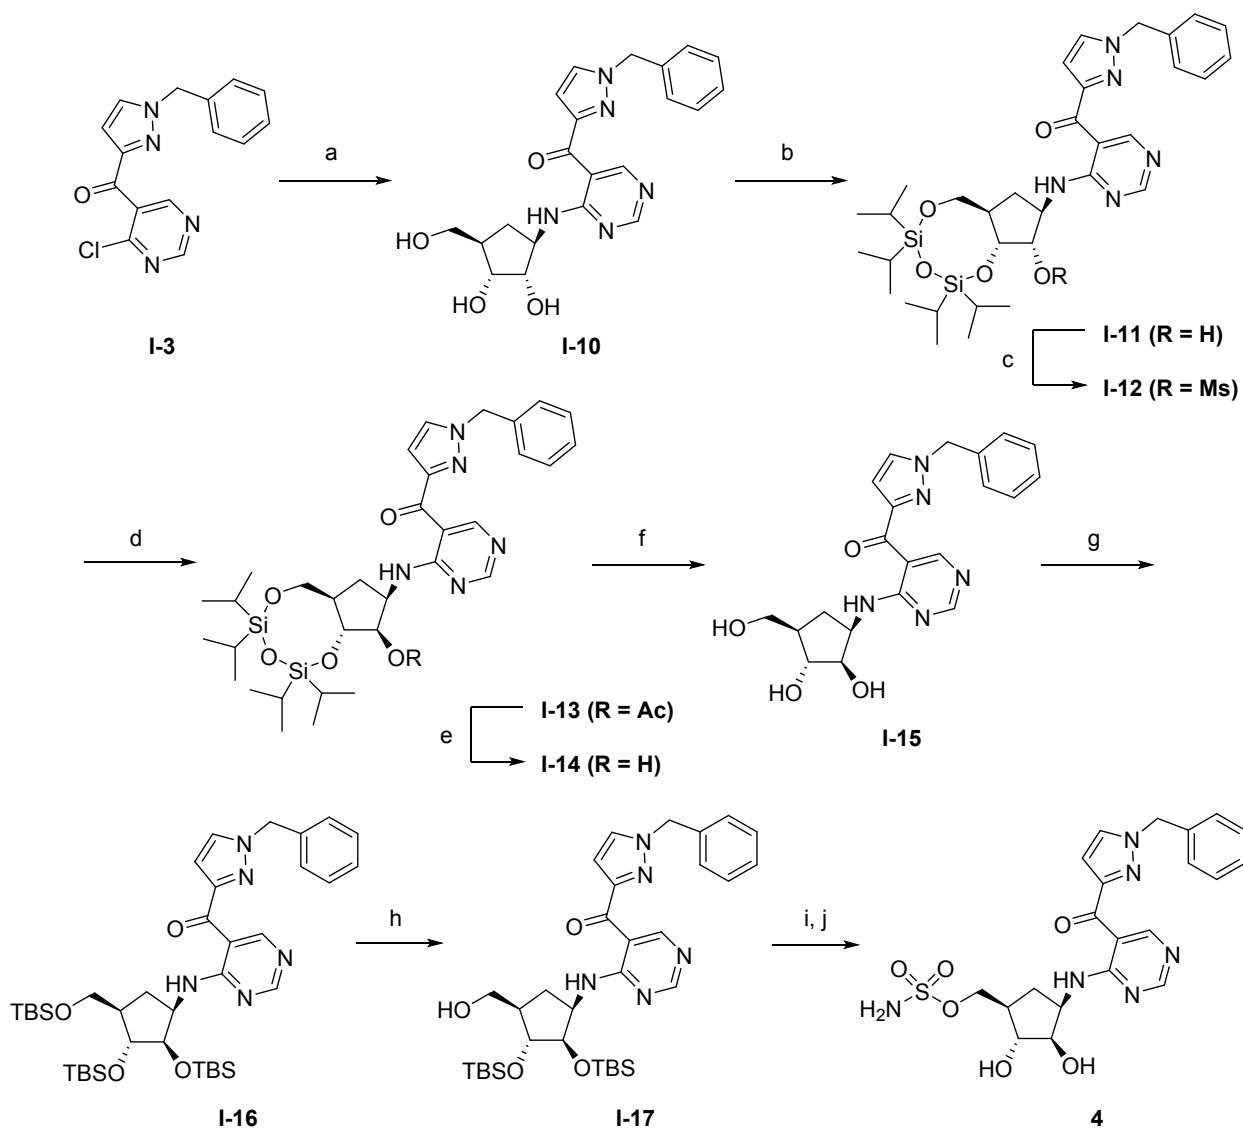

Reagents: (a) (1*R*,2*S*,3*R*,5*R*)-3-amino-5-(hydroxymethyl)cyclopentane-1,2-diol hydrochloride, DIPEA, 1-PrOH, 50 °C, 18 h, 100%; (b) 1,3-dichloro-1,1,3,3-tetraisopropylidisiloxane, imidazole, DMF, rt, 16 h, 92%; (c) MsCl, DMAP, TEA, DCM, rt, 15 h, 100%; (d) CsOAc, 1,4,7,10,13,16-hexaoxacyclooctadecane, benzene, 80 °C, 7 h, 24%; (e) K<sub>2</sub>CO<sub>3</sub>, MeOH, rt, 20 h, 99%; (f) TBAF, THF, rt, 5 h, 84%; (g) TBSCl, DMAP, imidazole, DMF, rt, 77 h, 26%; (h) 1% HCl in EtOH, EtOH, 4 °C for 2 h and -20 °C for 60 h, 79%; (i) chlorosulfonamide, TEA, DMF, rt, 2 h; (j) 3N HCl, THF, 60 °C, 7 h, 61% for 2 steps.

**Step 1: (1-Benzyl-1*H*-pyrazol-3-yl)(4-{{[(1*R*,2*S*,3*R*,4*R*)-2,3-dihydroxy-4-(hydroxymethyl)cyclopentyl]amino}pyrimidin-5-yl)methanone (I-10).** (1-Benzyl-1*H*-pyrazol-3-yl)(4-chloropyrimidin-5-yl)methanone (**I-3**, 1.00 g, 3.35 mmol) and (1*R*,2*S*,3*R*,5*R*)-3-amino-5-(hydroxymethyl)cyclopentane-1,2-diol hydrochloride (for synthesis of this starting material see: Claiborne, C.F. et al. PCT Application Publication WO2008/019124) (0.68 g, 3.68 mmol) were weighed into a 250 mL round bottom flask fitted with a reflux condenser. To this mixture was added 1-PrOH (48 mL) and *N,N*-diisopropylethylamine (1.75 mL, 10.0 mmol). The resulting mixture was stirred at 50 °C for 18 h. The reaction was allowed to cool to rt and the solution was concentrated. The residue was purified on silica gel to yield **I-10** (1.3 g, 100%). <sup>1</sup>H NMR (DMSO-*d*<sub>6</sub>) δ 9.45 (s, 1H), 9.35–9.00 (m, 3H), 8.60 (s, 1H), 8.07 (d, 1H, *J* = 2.3 Hz), 7.40–7.26 (m, 5H), 6.90 (d, 1H, *J* = 2.5 Hz), 5.51 (s, 2H), 4.77 (d, 1H, *J* = 5.3 Hz), 4.66 (t, 1H, *J* = 5.1 Hz), 4.51–4.39 (m, 2H), 3.76–3.69 (m, 2H), 2.26 (ddd, 1H, *J* = 13.3, 9.3, 8.0 Hz), 1.99–1.90 (m, 1H), 1.18–1.08 (m, 1H).

**Step 2: (1-Benzyl-1*H*-pyrazol-3-yl)(4-{{[(6*aR*,8*R*,9*S*,9*aR*)-9-hydroxy-2,2,4,4-tetraisopropylhexahydrocyclopenta[*f*][1,3,5,2,4]trioxadisilocin-8-yl]amino}pyrimidin-5-yl)methanone (I-11).** A 100 mL round bottom flask under nitrogen was charged with (1-benzyl-1*H*-pyrazol-3-yl)(4-{{[(1*R*,2*S*,3*R*,4*R*)-2,3-dihydroxy-4-(hydroxymethyl)cyclopentyl]amino}pyrimidin-5-yl)methanone (1.3 g, 3.2 mmol), DMF (13 mL), and imidazole (0.87 g, 12.7 mmol). A solution of 1,3-dichloro-1,1,3,3-tetraisopropylidisiloxane (1.1 mL, 3.5 mmol) in DMF (10 mL) was added dropwise over 1 h. The resulting mixture was allowed to stir at rt overnight. After 16 h reaction was poured into a saturated NaHCO<sub>3</sub> solution and the mixture was extracted with EtOAc three times. The combined organic portions were washed with brine, dried over MgSO<sub>4</sub>, filtered, and concentrated. The crude product was purified on silica gel to give **I-11** (1.9 g, 92%). <sup>1</sup>H NMR (CDCl<sub>3</sub>) δ 9.77 (s, 1H), 9.45–9.35 (br d, 1H, *J* = 4.3 Hz), 8.71 (s, 1H), 7.44 (d, 1H, *J* = 2.3 Hz), 7.42–7.33 (m, 3H), 7.30–7.27 (m, 2H), 6.92 (d, 1H, *J* = 2.3 Hz), 5.41 (s, 2H), 4.50–4.41 (m, 1H), 4.25 (dd, 1H, *J* = 7.3, 6.3 Hz), 4.02–3.93 (m, 2H), 3.77 (dd, 1H, *J* = 11.8, 5.3 Hz), 2.99–2.96 (m, 1H), 2.35–2.25 (m, 2H), 1.39–1.32 (m, 1H), 1.13–0.98 (m, 28H). LCMS (FA): *m/z* = 653.0 (M+H).

**Step 3: (6*aR*,8*R*,9*S*,9*aR*)-8-({5-[(1-Benzyl-1*H*-pyrazol-3-yl)carbonyl]pyrimidin-4-yl}amino)-2,2,4,4-tetraisopropylhexahydrocyclopenta[*f*][1,3,5,2,4]trioxadisilocin-9-yl methanesulfonate (I-12).** A 500 mL round bottom flask under nitrogen was charged with (1-benzyl-1*H*-pyrazol-3-yl)(4-{{[(6*aR*,8*R*,9*S*,9*aR*)-9-hydroxy-2,2,4,4-tetraisopropylhexahydrocyclopenta[*f*][1,3,5,2,4]trioxadisilocin-8-yl]amino}pyrimidin-5-yl)methanone (1.8 g, 2.8 mmol), DCM (8 mL), triethylamine (0.42 mL, 3.0 mmol) and DMAP (0.37 g, 3.0 mmol). The reaction was cooled in an ice bath and a solution of methanesulfonyl chloride (0.24 mL, 3.0 mmol) in DCM (6 mL) was added dropwise. The reaction was then allowed to slowly warm to rt and stir overnight. After stirring 15 h, the reaction was quenched by the addition of water. The mixture was extracted with EtOAc three times. The combined organic layers were dried over MgSO<sub>4</sub>, filtered, and concentrated to give **I-12** (2 g, 100%). <sup>1</sup>H NMR (CDCl<sub>3</sub>) δ 9.78 (s, 1H), 9.17 (d, 1H, *J* = 6.3 Hz), 8.68 (s, 1H), 7.44 (d, 1H, *J* = 2.5 Hz), 7.41–7.34 (m, 3H), 7.29–7.26 (m, 2H), 6.92 (d, 1H, *J* = 2.5 Hz), 5.40 (s, 2H), 4.98 (d, 1H, *J* = 4.8 Hz), 4.58–4.50 (m, 1H), 4.24 (dd, 1H, *J* = 10.8, 4.8 Hz), 4.01 (dd, 1H, *J* = 11.8, 3.0 Hz), 3.83 (dd, 1H,

$J = 10.5, 1.3$  Hz), 3.24 (s, 3H), 2.33 (ddd, 1H,  $J = 13.1, 9.0, 7.5$  Hz), 2.27–2.17 (m, 1H), 1.69 (ddd, 1H,  $J = 13.1, 11.5, 7.3$  Hz), 1.13–1.03 (m, 28H). LCMS (FA):  $m/z = 731.0$  (M+H).

**Step 4: (6a*R*,8*R*,9*R*,9a*R*)-8-({5-[(1-Benzyl-1*H*-pyrazol-3-yl)carbonyl]pyrimidin-4-yl}amino)-2,2,4,4-tetraisopropylhexahydrocyclopenta[*f*][1,3,5,2,4]trioxadisilocin-9-yl acetate (I-13).** A 500 mL round bottom flask under nitrogen was charged with (6a*R*,8*R*,9*S*,9a*R*)-8-({5-[(1-benzyl-1*H*-pyrazol-3-yl)carbonyl]pyrimidin-4-yl}amino)-2,2,4,4-tetraisopropylhexahydrocyclopenta[*f*][1,3,5,2,4]trioxadisilocin-9-yl methanesulfonate (1.1 g, 1.5 mmol), benzene (20 mL), 1,4,7,10,13,16-hexaoxacyclooctadecane (0.21 g, 0.78 mmol), and CsOAc (0.91 g, 4.7 mmol). The reaction was then heated at 80 °C while stirring. After 7 h, additional CsOAc (0.91 g, 4.7 mmol) was added and the reaction continued to stir overnight at 80 °C. The reaction was subsequently quenched by the addition of water then extracted with EtOAc three times. The combined extracts were concentrated and the crude material purified on silica gel to provide **I-13** (0.25 g, 24%). LCMS (FA):  $m/z = 695.0$  (M+H).

**Step 5: (1-Benzyl-1*H*-pyrazol-3-yl)(4-{{(6a*R*,8*R*,9*R*,9a*R*)-9-hydroxy-2,2,4,4-tetraisopropylhexahydrocyclopenta[*f*][1,3,5,2,4]trioxadisilocin-8-yl}amino}pyrimidin-5-yl)methanone (I-14).** (6a*R*,8*R*,9*R*,9a*R*)-8-({5-[(1-Benzyl-1*H*-pyrazol-3-yl)carbonyl]pyrimidin-4-yl}amino)-2,2,4,4-tetraisopropylhexahydrocyclopenta[*f*][1,3,5,2,4]trioxadisilocin-9-yl acetate (0.15 g, 0.22 mmol), MeOH (7 mL), and K<sub>2</sub>CO<sub>3</sub> (90 mg, 0.6 mmol) were stirred in a 20 mL scintillation vial at rt for 20 h. The reaction mixture was then concentrated and a solution of saturated NaHCO<sub>3</sub> (aq.) (20 mL) was added. The resulting mixture was extracted with EtOAc three times. The combined organic layers were dried over MgSO<sub>4</sub>, filtered, and concentrated to yield **I-14** (0.14 g, 99%). <sup>1</sup>H NMR (CDCl<sub>3</sub>)  $\delta$  9.71 (br s, 1H), 9.48 (d, 1H,  $J = 6.4$  Hz), 8.63 (s, 1H), 7.45–7.30 (m, 5H), 7.26–7.23 (m, 1H), 6.92 (d, 1H,  $J = 2.3$  Hz), 5.39 (s, 2H), 4.65–4.55 (m, 1H), 4.26–4.20 (m, 1H), 4.13–4.08 (m, 1H), 3.99 (dd, 1H,  $J = 11.6, 3.5$  Hz), 3.72 (dd, 1H,  $J = 11.6, 5.8$  Hz), 2.76–2.57 (br s, 1H), 2.34–2.25 (m, 1H), 2.03–1.93 (m, 1H), 1.62–1.52 (m, 1H), 1.12–1.02 (m, 28H). LCMS (FA):  $m/z = 653.0$  (M+H).

**Step 6: (1-Benzyl-1*H*-pyrazol-3-yl)(4-{{(1*R*,2*R*,3*R*,4*R*)-2,3-dihydroxy-4-(hydroxymethyl)cyclopentyl}amino}pyrimidin-5-yl)methanone (I-15).** (1-Benzyl-1*H*-pyrazol-3-yl)(4-{{(6a*R*,8*R*,9*R*,9a*R*)-9-hydroxy-2,2,4,4-tetraisopropylhexahydrocyclopenta[*f*][1,3,5,2,4]trioxadisilocin-8-yl}amino}pyrimidin-5-yl)methanone (0.36 g, 0.55 mmol) was dissolved in THF (5 mL). TBAF (1.0 M solution in THF; 0.58 mL, 0.58 mmol) was added and the solution was allowed to stir at rt. After stirring for 1 h, additional TBAF (1.0 M solution in THF; 0.2 mL, 0.2 mmol) was added and the reaction stirred an additional 4 h. The reaction mixture was concentrated and purified on silica gel to afford **I-15** (0.19 g, 84%). <sup>1</sup>H NMR (DMSO-*d*<sub>6</sub>)  $\delta$  9.48 (s, 1H), 9.37 (d, 1H,  $J = 7.7$  Hz), 8.60 (s, 1H), 8.05 (d, 1H,  $J = 2.4$  Hz), 7.40–7.27 (m, 5H), 6.90 (d, 1H,  $J = 2.4$  Hz), 5.50 (s, 2H), 5.34 (d, 1H,  $J = 4.8$  Hz), 4.81 (d, 1H,  $J = 4.6$  Hz), 4.61–4.52 (m, 2H), 3.80–3.75 (m, 1H), 3.65–3.61 (m, 1H), 3.52–3.45 (m, 1H), 3.39–3.31 (m, 1H), 2.22 (td, 1H,  $J = 12.5, 7.7$  Hz), 1.89–1.79 (m, 1H), 1.34–1.24 (m, 1H). LCMS (FA):  $m/z = 410.4$  (M+H).

**Step 7: (1-Benzyl-1*H*-pyrazol-3-yl)(4-{{(1*R*,2*R*,3*R*,4*R*)-2,3-bis{{*tert*-butyl(dimethyl)silyl}oxy}-4-({*tert*-butyl(dimethyl)silyl}oxy)methyl}cyclopentyl}amino}pyrimidin-5-yl)methanone (I-16).** To a

solution of (1-benzyl-1*H*-pyrazol-3-yl)(4-{{(1*R*,2*R*,3*R*,4*R*)-2,3-dihydroxy-4-(hydroxymethyl)cyclopentyl}amino}pyrimidin-5-yl)methanone (0.19 g, 0.45 mmol) in DMF (8.0 mL) was added imidazole (0.22 g, 3.2 mmol) and DMAP (5.5 mg, 0.05 mmol) followed by TBSCl (0.34 g, 2.3 mmol) at rt, and the mixture was stirred for 3 days. Additional imidazole (0.09 g, 1.4 mmol) and TBSCl (0.14 g, 0.90 mmol) were added and the reaction was allowed to continue to stir at rt. After 5 h, TLC and LCMS showed no starting material, but a mixture of the bis-silylated and tris-silylated desired products. The reaction was quenched by addition of water and extracted with EtOAc three times. The combined organic layers were dried over MgSO<sub>4</sub>, filtered, and concentrated in vacuo. The residue was purified on silica gel to give **I-16** (0.09g, 26%). <sup>1</sup>H NMR (CDCl<sub>3</sub>) δ 9.68 (s, 1H), 9.26 (d, 1H, *J* = 8.3 Hz), 8.65 (s, 1H), 7.43–7.39 (m, 1H), 7.39–7.33 (m, 3H), 7.29–7.25 (m, 2H), 6.90 (d, 1H, *J* = 2.5 Hz), 5.39 (s, 2H), 4.92–4.83 (m, 1H), 3.98 (d, 1H, *J* = 3.5 Hz), 3.94–3.90 (m, 1H), 3.67–3.62 (m, 1H), 3.57 (dd, 1H, *J* = 9.6, 7.0 Hz), 2.32 (td, 1H, *J* = 12.4, 8.4 Hz), 2.15–2.06 (m, 1H), 1.39–1.29 (m, 1H), 0.92 (s, 9H), 0.91 (s, 9H), 0.90 (s, 9H), 0.12 (s, 3H), 0.11 (s, 3H), 0.06 (s, 3H), 0.05 (s, 6H), -0.02 (s, 3H). LCMS (FA): *m/z* = 753.2 (M+H).

**Step 8: (1-Benzyl-1*H*-pyrazol-3-yl)(4-{{(1*R*,2*R*,3*R*,4*R*)-2,3-bis{{*tert*-butyl(dimethyl)silyl}oxy}-4-(hydroxymethyl)cyclopentyl}amino}pyrimidin-5-yl)methanone (**I-17**).** To a solution of 1-benzyl-1*H*-pyrazol-3-yl)(4-{{(1*R*,2*R*,3*R*,4*R*)-2,3-bis{{*tert*-butyl(dimethyl)silyl}oxy}-4-({*tert*-butyl(dimethyl)silyl}oxy)methyl)cyclopentyl}amino}pyrimidin-5-yl)methanone (90.0 mg, 0.12 mmol) in EtOH (3.0 mL) was added a solution of 1% HCl in EtOH (3.0 mL, 0.36 mmol) at rt. The reaction mixture was sealed and placed in a refrigerator (4 °C) for 2 h then moved to a -20 °C freezer for 60 h. The reaction was then quenched by the addition of aq. saturated NaHCO<sub>3</sub> (10 mL). To the residue was added water (20mL) and it was extracted with EtOAc four times. The combined organic layers were dried over MgSO<sub>4</sub>, filtered, and concentrated. The residue was purified on silica gel to yield **I-17** (0.06 g, 79%). <sup>1</sup>H NMR (CDCl<sub>3</sub>) δ 9.74 (s, 1H), 9.44–9.22 (br s, 1H), 8.66 (s, 1H), 7.44–7.33 (m, 4H), 7.30–7.26 (m, 2H), 6.92 (d, 1H, *J* = 2.2 Hz), 5.40 (s, 2H), 4.99–4.91 (m, 1H), 4.03–3.99 (m, 1H), 3.94–3.90 (m, 1H), 3.77–3.63 (m, 2H), 2.41–2.31 (m, 1H), 2.22–2.14 (m, 1H), 2.04–1.96 (br s, 1H), 1.66–1.59 (m, 1H), 0.93 (s, 9H), 0.92 (s, 9H), 0.13 (s, 3H), 0.12 (s, 3H), 0.07 (s, 3H), -0.01 (s, 3H).

**Step 9: [(1*R*,2*R*,3*R*,4*R*)-4-({5-[(1-Benzyl-1*H*-pyrazol-3-yl)carbonyl]pyrimidin-4-yl}amino)-2,3-dihydroxycyclopentyl)methyl sulfamate (**4**).**

To a solution of (1-benzyl-1*H*-pyrazol-3-yl)(4-{{(1*R*,2*R*,3*R*,4*R*)-2,3-bis{{*tert*-butyl(dimethyl)silyl}oxy}-4-(hydroxymethyl)cyclopentyl}amino}pyrimidin-5-yl)methanone (0.06 g, 0.09 mmol) in DMF (1.5 mL) and triethylamine (0.08 mL, 0.56 mmol) was added chlorosulfonamide (0.05 g, 0.42 mmol) at rt, and the mixture was allowed to stir for 1 h. Additional chlorosulfonamide (25.0 mg, 0.21 mmol) was then added and the reaction stirred at rt an additional 1 h. The reaction was quenched with sat NaHCO<sub>3</sub>, and then extracted with EtOAc four times. The combined organic layers were dried over MgSO<sub>4</sub>, filtered and concentrated to give the crude sulfamate intermediate which was immediately dissolved in THF (4 mL). HCl (3.0 M solution in water; 1 mL, 3 mmol) was added to the solution. The reaction flask was fitted with a reflux condenser and the reaction stirred at 60 °C for 7 h. The reaction was then quenched with saturated NaHCO<sub>3</sub>, and then extracted with EtOAc four times. The combined organic layers



were dried over  $\text{MgSO}_4$ , filtered and concentrated. The crude product was triturated with DCM and collected as a white solid to provide **4** (40 mg, 61%).  $^1\text{H}$  NMR ( $\text{DMSO-}d_6$ )  $\delta$  9.50 (s, 1H), 9.39 (d, 1H,  $J = 7.5$  Hz), 8.62 (s, 1H), 8.07 (d, 1H,  $J = 2.4$  Hz), 7.43 (s, 2H), 7.41–7.27 (m, 5H), 6.91 (d, 1H,  $J = 2.4$  Hz), 5.59 (d, 1H,  $J = 4.4$  Hz), 5.51 (s, 2H), 5.12 (d, 1H,  $J = 4.7$  Hz), 4.67–4.53 (m, 1H), 4.13 (dd, 1H,  $J = 9.4, 6.5$  Hz), 4.01–3.92 (m, 1H), 3.87–3.79 (m, 1H), 3.66 (dd, 1H,  $J = 6.7, 4.4$  Hz), 2.38–2.28 (m, 1H), 2.14–2.03 (m, 1H), 1.40–1.25 (m, 1H). LCMS (FA):  $m/z = 489.5$  ( $\text{M}+\text{H}$ ). HRMS  $m/z$   $[\text{M}+\text{H}]^+$  calcd for  $\text{C}_{21}\text{H}_{25}\text{N}_6\text{O}_6\text{S}$  489.1556, obsd 489.1556.

## Synthesis of 7

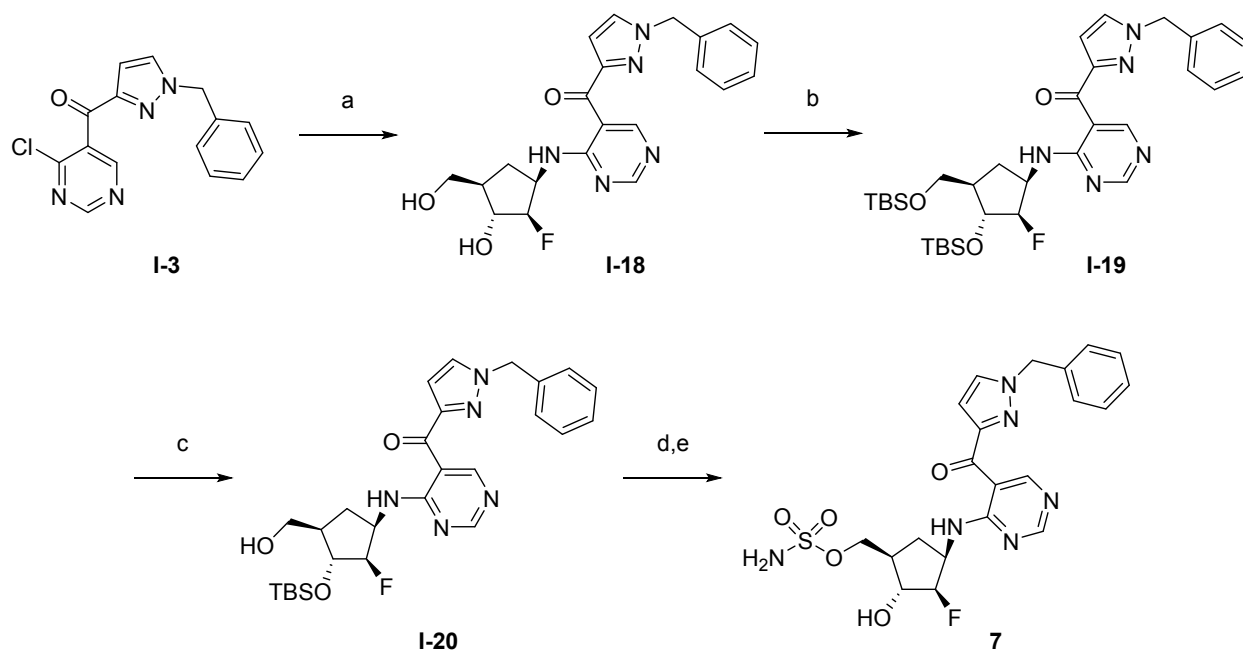

Reagents: (a) (1R,2R,3R,5R)-3-amino-2-fluoro-5-(hydroxymethyl)cyclopentanol hydrochloride, DIPEA, 1-PrOH, 50 °C, 2 h, 94%; (b) TBSCl, imidazole, DMF, rt, 72 h, 92%; (c) 1% HCl in EtOH, EtOH, 4 °C, 22 h, 71%; (d) chlorosulfonamide, DMF, rt, 1 h; (e) 3N HCl, THF, rt, 3 h, 44% for 2 steps.

**Step 1: (1-Benzyl-1H-pyrazol-3-yl)(4-[(1R,2R,3R,4R)-2-fluoro-3-hydroxy-4-(hydroxymethyl)cyclopentyl]amino}pyrimidin-5-yl)methanone (**I-18**).** (1-Benzyl-1H-pyrazol-3-yl)(4-chloropyrimidin-5-yl)methanone (**I-3**, 0.30 g, 1.0 mmol) and (1R,2R,3R,5R)-3-amino-2-fluoro-5-(hydroxymethyl)cyclopentanol hydrochloride (0.21 g, 1.11 mmol) (for synthesis see: Biggadike, K. et al. *J. Chem. Soc. Perkin Trans.* **1988**, 3, 549-554; Borthwick, A.D. et al. *J. Med. Chem.* **1990**, 33, 179-186) were weighed into a 20 mL reaction vessel. To this mixture was added 1-PrOH (14 mL) and *N,N*-diisopropylethylamine (0.52 mL, 3.0 mmol). The resulting mixture was sealed and the vessel allowed to stir while heating at 50 °C for 2 h. The reaction was then cooled to rt and the reaction was concentrated. The crude product was purified on silica gel to afford **I-18** (0.38 g, 94%).  $^1\text{H}$  NMR ( $\text{DMSO-}d_6$ )  $\delta$  9.55 (s, 1H), 9.23 (d, 1H,  $J = 7.8$  Hz), 8.67 (s, 1H), 8.07 (d, 1H,  $J = 2.3$  Hz), 7.40–7.35 (m, 2H), 7.34–7.27 (m, 3H), 6.93 (d, 1H,  $J = 2.5$  Hz), 5.51 (s, 2H), 5.29 (d, 1H,  $J = 5.0$  Hz), 4.87–4.71 (m, 2H), 4.69 (t, 1H,  $J = 5.3$  Hz), 3.95–3.85 (m, 1H), 3.51–3.45 (m, 1H), 3.43–3.37 (m, 1H), 2.29–2.21 (m, 1H), 1.96–1.86 (m, 1H), 1.45–1.35 (m, 1H). LCMS (FA):  $m/z = 412.4$  ( $\text{M}+\text{H}$ ).

**Step 2: (1-Benzyl-1*H*-pyrazol-3-yl)(4-{{(1*R*,2*R*,3*R*,4*R*)-3-{{*tert*-butyl(dimethyl)silyl}oxy}-4-{{*tert*-butyl(dimethyl)silyl}oxy}methyl)-2-fluorocyclopentyl}amino}pyrimidin-5-yl)methanone (I-19).** To a solution of (1-benzyl-1*H*-pyrazol-3-yl)(4-{{(1*R*,2*R*,3*R*,4*R*)-2-fluoro-3-hydroxy-4-(hydroxymethyl)cyclopentyl}amino}pyrimidin-5-yl)methanone (0.37 g, 0.90 mmol) in DMF (14.8 mL) was added imidazole (0.24 g, 3.6 mmol) followed by TBSCl (0.34 g, 2.2 mmol) at rt, and the mixture was stirred for 3 d. The reaction was then quenched by addition of water and extracted with EtOAc three times. The combined organic layers were washed with brine, dried over MgSO<sub>4</sub>, filtered, and concentrated. The residue was purified on silica gel to give **I-19** (0.53 g, 92%).

**Step 3: (1-Benzyl-1*H*-pyrazol-3-yl)(4-{{(1*R*,2*R*,3*R*,4*R*)-3-{{*tert*-butyl(dimethyl)silyl}oxy}-2-fluoro-4-(hydroxymethyl)cyclopentyl}amino}pyrimidin-5-yl)methanone (I-20).** To a solution of (1-benzyl-1*H*-pyrazol-3-yl)(4-{{(1*R*,2*R*,3*R*,4*R*)-3-{{*tert*-butyl(dimethyl)silyl}oxy}-4-{{*tert*-butyl(dimethyl)silyl}oxy}methyl)-2-fluorocyclopentyl}amino}pyrimidin-5-yl)methanone (0.50 g, 0.78 mmol) in EtOH (50 mL) was added 1% HCl in EtOH (25.9 mL, 3.12 mmol) at rt. The reaction vessel was sealed and placed in a refrigerator (4 °C) for 22 h. The reaction was quenched by addition of a saturated aq. solution of NaHCO<sub>3</sub>. To the residue was added water which was extracted with EtOAc four times. The combined organic layers were dried over MgSO<sub>4</sub>, filtered, and concentrated. The residue was purified on silica gel to give **I-20** (0.29 g, 71%). <sup>1</sup>H NMR (CDCl<sub>3</sub>) δ 9.76 (s, 1H), 9.48–9.42 (br d, 1H, *J* = 7.8 Hz), 8.68 (s, 1H), 7.43 (d, 1H, *J* = 2.5 Hz), 7.41–7.34 (m, 3H), 7.29–7.25 (m, 2H), 6.94 (d, 1H, *J* = 2.3 Hz), 5.40 (s, 2H), 4.99–4.72 (m, 2H), 4.15 (ddd, 1H, *J* = 21.1, 5.0, 1.5 Hz), 3.77–3.67 (m, 2H), 2.48–2.39 (m, 1H), 2.20–2.09 (m, 1H), 1.58–1.46 (m, 2H), 0.92 (s, 9H), 0.14 (s, 3H), 0.13 (s, 3H). LCMS (FA): *m/z* = 526.7 (M+H).

**Step 4: [(1*R*,2*R*,3*R*,4*R*)-4-{{5-[(1-Benzyl-1*H*-pyrazol-3-yl)carbonyl]pyrimidin-4-yl}amino)-3-fluoro-2-hydroxycyclopentyl]methyl sulfamate (7).**

To a solution of (1-benzyl-1*H*-pyrazol-3-yl)(4-{{(1*R*,2*R*,3*R*,4*R*)-3-{{*tert*-butyl(dimethyl)silyl}oxy}-2-fluoro-4-(hydroxymethyl)cyclopentyl}amino}pyrimidin-5-yl)methanone (0.28 g, 0.53 mmol) in DMF (4.0 mL) was added chlorosulfonamide (123 mg, 1.1 mmol) at rt, and the mixture was stirred for 1 h. The reaction was quenched by addition of a saturated solution of NaHCO<sub>3</sub> and diluted with water. The mixture was extracted with EtOAc four times. The combined organic layers were dried over MgSO<sub>4</sub>, filtered, and concentrated. The crude sulfamate intermediate was dissolved in THF (11 mL) and HCl (3.0 M in water; 5.50 mL, 16.5 mmol) was added to the solution. The reaction was stirred for 3 h at rt. The reaction was quenched by the addition of a saturated solution of NaHCO<sub>3</sub> (30 mL) and extracted with EtOAc four times. The combined organic layers were dried over MgSO<sub>4</sub>, filtered, and concentrated. The residue was purified by prep HPLC to afford **7** (115 mg, 44%). <sup>1</sup>H NMR (DMSO-*d*<sub>6</sub>) δ 9.56 (d, 1H, *J* = 1.1 Hz), 9.23 (d, 1H, *J* = 7.6 Hz), 8.68 (s, 1H), 8.07 (dd, 1H, *J* = 2.3, 1.2 Hz), 7.50 (s, 2H), 7.43–7.22 (m, 5H), 6.93 (d, 1H, *J* = 2.4 Hz), 5.57 (s, 1H), 5.51 (s, 2H), 4.93–4.70 (m, 2H), 4.12 (dd, 1H, *J* = 9.8, 6.0 Hz), 4.03 (dd, 1H, *J* = 9.8, 6.9 Hz), 3.94 (dd, 1H, *J* = 21.9, 4.7 Hz), 2.41–2.28 (m, 1H), 2.25–2.12 (m, 1H), 1.47 (dd, 1H, *J* = 22.4, 11.4 Hz). LCMS (FA): *m/z* = 491.5 (M+H). HRMS *m/z* [M+H]<sup>+</sup> calcd for C<sub>21</sub>H<sub>24</sub>FN<sub>6</sub>O<sub>5</sub>S 491.1513, obsd 491.1515.

## Synthesis of 5

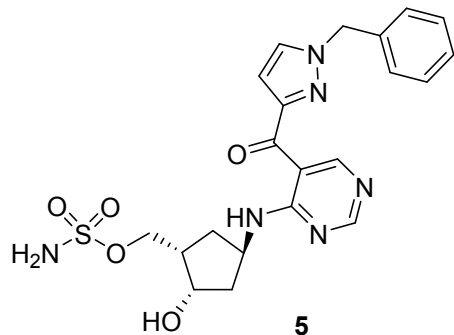

**[(1*S*,2*S*,4*R*)-4-({5-[(1-benzyl-1*H*-pyrazol-3-yl)carbonyl]pyrimidin-4-yl}amino)-2-hydroxycyclopentyl]methyl sulfamate (5).**

Prepared by the method described for the preparation of **7** using intermediate **I-3** and (1*S*,2*S*,4*R*)-4-amino-2-(hydroxymethyl)cyclopentanol hydrobromide (for synthesis see: Armitage, I. et al. US Patent Application Publication 2009/0036678) as the starting material in Step 1. <sup>1</sup>H NMR (MeOD) δ 9.61 (s, 1H), 8.54 (s, 1H), 7.79 (d, 1H, *J* = 2.3 Hz), 7.38–7.29 (m, 5H), 6.93 (d, 1H, *J* = 2.5 Hz), 5.45 (s, 2H), 4.92–4.84 (m, 1H), 4.41–4.31 (m, 2H), 4.18–4.14 (m, 1H), 2.61–2.51 (m, 1H), 2.36–2.31 (m, 1H), 2.19–2.10 (m, 1H), 1.91–1.76 (m, 2H). LCMS (FA): *m/z* = 471.0 (M+H). HRMS *m/z* [M+H]<sup>+</sup> calcd for C<sub>21</sub>H<sub>25</sub>N<sub>6</sub>O<sub>5</sub>S 473.1607, obsd 473.1595.

**Synthesis of 6**

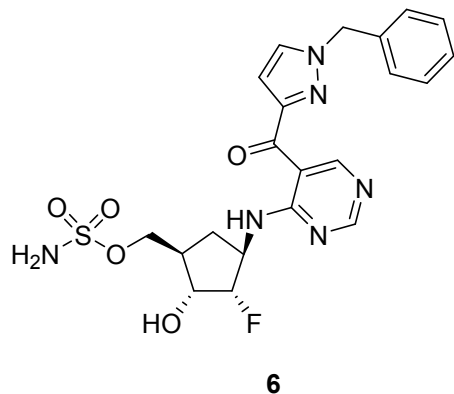

**[(1*R*,2*R*,3*S*,4*R*)-4-({5-[(1-Benzyl-1*H*-pyrazol-3-yl)carbonyl]pyrimidin-4-yl}amino)-3-fluoro-2-hydroxycyclopentyl]methyl sulfamate (6).**

Prepared by the method described for the preparation of **7** using intermediate **I-3** and (1*R*,2*S*,3*R*,5*R*)-3-amino-2-fluoro-5-(hydroxymethyl)cyclopentanol hydrochloride (for synthesis see: Biggadike, K. et al. *J. Chem. Soc. Perkin Trans.* **1988**, 3, 549-554; Borthwick, A.D. et al. *J. Med. Chem.* **1990**, 33, 179-186) as the starting material in Step 1. <sup>1</sup>H NMR (DMSO-*d*<sub>6</sub>) δ 9.44 (s, 1H), 8.97 (d, 1H, *J* = 7.4 Hz), 8.65 (s, 1H), 8.07 (d, 1H, *J* = 1.5 Hz), 7.47 (s, 2H), 7.39–7.28 (m, 5H), 6.92 (d, 1H, *J* = 1.4 Hz), 5.51 (s, 2H), 5.26–5.25 (m, 1H), 4.86–4.72 (m, 2H), 4.19–4.15 (m, 1H), 4.06–4.01 (m, 1H), 3.92–3.84 (m, 1H), 2.39–2.22 (m, 2H), 1.38–1.31 (m, 1H). LCMS (FA): *m/z* = 491.0 (M+H). HRMS *m/z* [M+H]<sup>+</sup> calcd for C<sub>21</sub>H<sub>24</sub>FN<sub>6</sub>O<sub>5</sub>S 491.1513, obsd 491.1511.

## Synthesis of 8

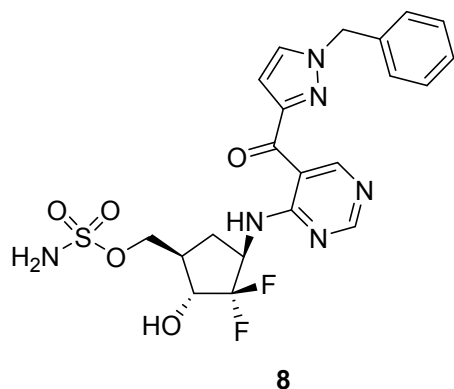

### [(1*R*,2*R*,4*R*)-4-({5-[(1-benzyl-1*H*-pyrazol-3-yl)carbonyl]pyrimidin-4-yl}amino)-3,3-difluoro-2-hydroxycyclopentyl]methyl sulfamate (**8**).

Prepared by the method described for the preparation of **7** using intermediate **I-3** and (1*R*,3*R*,5*R*)-3-amino-2,2-difluoro-5-(hydroxymethyl)cyclopentanol hydrochloride (for synthesis see: Biggadike, K. et al. *J. Chem. Soc. Perkin Trans.* **1988**, 3, 549-554; Borthwick, A.D. et al. *J. Med. Chem.* **1990**, 33, 179-186) as the starting material in Step 1. <sup>1</sup>H NMR (DMSO-*d*<sub>6</sub>) δ 9.57 (s, 1H), 9.18 (d, 1H, *J* = 8.4 Hz), 8.69 (s, 1H), 8.08 (d, 1H, *J* = 2.2 Hz), 7.75–7.03 (m, 7H), 6.95 (d, 1H, *J* = 2.2 Hz), 5.52 (s, 2H), 5.10–4.92 (m, 1H), 4.19–3.97 (m, 2H), 3.84 (dt, 1H, *J* = 15.8, 8.0 Hz), 2.40–2.28 (m, 1H), 2.27–2.13 (m, 1H), 1.44 (dd, 1H, *J* = 22.8, 11.1 Hz). LCMS (FA): *m/z* = 509.4 (M+H). HRMS *m/z* [M+H]<sup>+</sup> calcd for C<sub>21</sub>H<sub>23</sub>F<sub>2</sub>N<sub>6</sub>O<sub>5</sub>S 509.1419, obsd 509.1427.

## Procedures for the syntheses of compounds in Table 3

### Synthesis of 9

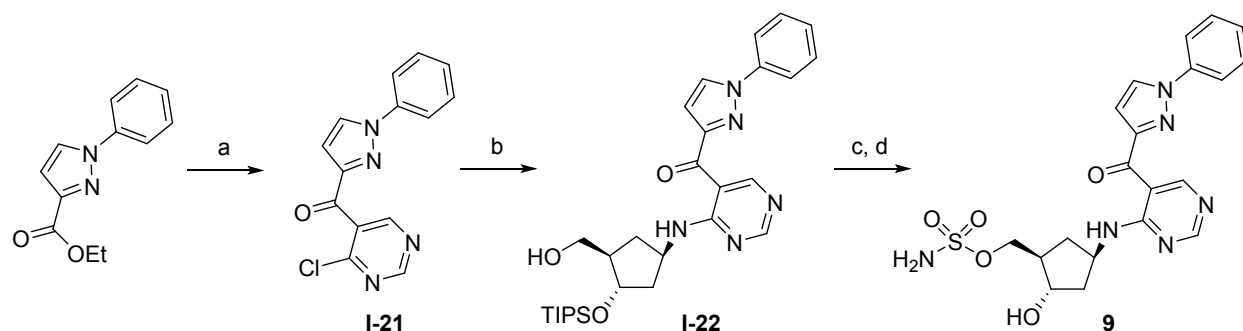

Reagents: (a) 4-chloro-5-iodopyrimidine, *n*-BuLi, THF, -78 °C, 0.5 h, 54%; (b) **I-8**, K<sub>2</sub>CO<sub>3</sub>, DMF, rt, 2 h, 83%; (c) chlorosulfonamide, DMF, 0.5 h, rt; (e) 4N HCl, THF, rt, 5 h, 88% for 2 steps.

**Step 1: (4-Chloropyrimidin-5-yl)(1-phenyl-1*H*-pyrazol-3-yl)methanone (I-21).** A round bottom flask was charged with 4-chloro-5-iodopyrimidine (360 mg, 1.5 mmol) and the reaction vessel was purged with argon. The content was dissolved in THF (12 mL) and the solution was

cooled to -78 °C. To the solution was added dropwise *n*-BuLi (2.50 M solution in hexane; 1.2 mL, 3.0 mmol), and the mixture was stirred for 30 min at -78 °C. To this mixture was added dropwise a solution of ethyl 1-phenyl-1*H*-pyrazole-3-carboxylate (300 mg, 1.4 mmol) in THF (6 mL), and the resulting mixture was stirred for 30 min. The reaction was quenched by addition of saturated NH<sub>4</sub>Cl (50 mL) and extracted with EtOAc (50 mL) four times. The combined organic layers were dried over Na<sub>2</sub>SO<sub>4</sub>, filtered, and concentrated in vacuo. The residue was purified on silica gel to give **I-21** (210 mg, 54%) as a colorless solid. <sup>1</sup>H NMR (CDCl<sub>3</sub>) δ 9.14 (s, 1H), 9.01 (s, 1H), 8.06 (d, 1H, *J* = 2.8 Hz), 7.72–7.67 (m, 2H), 7.53–7.47 (m, 2H), 7.43–7.38 (m, 1H), 7.25 (d, 1H, *J* = 2.5 Hz). LCMS (FA): *m/z* = 285.1 (M+H).

**Step 2: [4-((1*R*,3*R*,4*S*)-3-(Hydroxymethyl)-4-((triisopropylsilyl)oxy)cyclopentyl)amino]pyrimidin-5-yl](1-phenyl-1*H*-pyrazol-3-yl)methanone (**I-22**).** A reaction vessel was charged with {(1*R*,2*S*,4*R*)-4-amino-2-((triisopropylsilyl)oxy)cyclopentyl} methanol-TFA (**I-8**, 293 mg, 0.73 mmol) and K<sub>2</sub>CO<sub>3</sub> (277 mg, 2.00 mmol). To the mixture was added a solution of (4-chloropyrimidin-5-yl)(1-phenyl-1*H*-pyrazol-3-yl)methanone (190 mg, 0.67 mmol) in DMF (6 mL), and the resulting mixture was stirred for 2 h at rt. The reaction was concentrated in vacuo. To the residue was added water (40 mL) and the mixture was extracted with EtOAc (50 mL) three times. The combined organic layers were dried over Na<sub>2</sub>SO<sub>4</sub>, filtered, and concentrated in vacuo. The residue was purified on silica gel to give **I-22** (311 mg, 83%) as a yellow sticky oil. <sup>1</sup>H NMR (CDCl<sub>3</sub>) δ 9.85 (s, 1H), 9.33 (br d, 1H, *J* = 6.9 Hz), 8.69 (s, 1H), 8.02 (d, 1H, *J* = 2.0 Hz), 7.78 (br d, 1H, *J* = 7.9 Hz), 7.52 (br t, 2H, *J* = 7.7 Hz), 7.40 (br t, 1H, *J* = 7.4 Hz), 7.11 (d, 1H, *J* = 2.0 Hz), 4.93–4.81 (m, 1H), 4.37 (q, 1H, *J* = 4.7 Hz), 3.74 (br t, 2H, *J* = 4.8 Hz), 2.60–2.49 (m, 1H), 2.29–2.18 (m, 2H), 1.96–1.86 (m, 1H), 1.85–1.78 (m, 1H), 1.42–1.23 (m, 2H), 1.10 (s, 21H). LCMS (FA): *m/z* = 536.4 (M+H).

**Step 3: [(1*R*,2*S*,4*R*)-2-Hydroxy-4-({5-[(1-phenyl-1*H*-pyrazol-3-yl)carbonyl]pyrimidin-4-yl}amino)cyclopentyl]methyl sulfamate (**9**).** To a solution of [4-((1*R*,3*R*,4*S*)-3-(hydroxymethyl)-4-((triisopropylsilyl)oxy)cyclopentyl)amino]pyrimidin-5-yl](1-phenyl-1*H*-pyrazol-3-yl)methanone (300 mg, 0.56 mmol) in DMF (2.0 mL) was added chlorosulfonamide (129 mg, 1.12 mmol) at rt, and the mixture was stirred for 30 min. The reaction was quenched by addition of saturated NaHCO<sub>3</sub> (50 mL) and extracted with EtOAc (60 mL) three times. The combined organic layers were dried over Na<sub>2</sub>SO<sub>4</sub>, filtered, and concentrated in vacuo. The residue was purified on silica gel to give the sulfamate intermediate [(267 mg, 78%); LCMS (FA): *m/z* = 615.2 (M+H)] which was dissolved in THF (2 mL). To this solution was added HCl (4.0 M solution in water; 2.0 mL, 8.0 mmol) at rt and the mixture was stirred for 5 h at rt. The reaction was quenched by addition of saturated NaHCO<sub>3</sub> and solid NaCl. The mixture was extracted with a 9:1 EtOAc:MeOH solution (60 mL) three times. The combined organic layers were dried over Na<sub>2</sub>SO<sub>4</sub>, filtered, and concentrated in vacuo. To the residue was added a small amount of DCM and the resulting suspension was filtered through a glass frit funnel. The residual solid was rinsed with DCM twice and dried under high vacuum overnight to give **9** (168 mg, 88%) as a colorless solid. <sup>1</sup>H NMR (DMSO-*d*<sub>6</sub>) δ 9.61 (s, 1H), 9.05 (d, 1H, *J* = 7.3 Hz), 8.69 (m, 2H), 7.98–7.89 (m, 2H), 7.63–7.54 (m, 2H), 7.47–7.39 (m, 3H), 7.14 (s, 1H), 4.91 (d, 1H, *J* = 4.5 Hz), 4.81–4.69 (m, 1H), 4.12 (dd, 1H, *J* = 9.5, 6.0 Hz), 4.03–3.95 (m, 2H), 2.44–2.34 (m, 1H), 2.21–2.10 (m, 1H), 2.08–

1.99 (m, 1H), 1.86–1.76 (m, 1H), 1.32 (dd, 1H,  $J = 21.8, 9.3$  Hz). LCMS (FA):  $m/z = 459.2$  (M+H); HRMS  $m/z$  [M+H]<sup>+</sup> calcd for C<sub>20</sub>H<sub>23</sub>N<sub>6</sub>O<sub>5</sub>S 459.1451, obsd 459.1448.

## Synthesis of 10

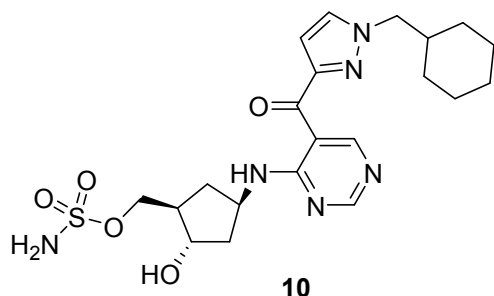

### {(1R,2S,4R)-4-[(5-[[1-(Cyclohexylmethyl)-1H-pyrazol-3-yl]carbonyl]pyrimidin-4-yl)amino]-2-hydroxycyclopentyl}methyl sulfamate (10).

Prepared by the method described for the preparation of **3** using (bromomethyl)cyclohexane as the starting material instead of benzyl bromide in Step 1 of the synthesis of **I-3**. <sup>1</sup>H NMR (DMSO-*d*<sub>6</sub>)  $\delta$  9.50 (s, 1H), 9.03 (d, 1H,  $J = 7.4$  Hz), 8.65 (s, 1H), 7.94 (s, 1H), 7.47 (s, 2H), 6.88 (d, 1H,  $J = 2.3$  Hz), 4.98–4.88 (m, 1H), 4.78–4.65 (m, 1H), 4.17–4.07 (m, 3H), 4.04–3.93 (m, 2H), 2.44–2.32 (m, 1H), 2.20–2.08 (m, 1H), 2.06–1.95 (m, 1H), 1.91–1.74 (m, 2H), 1.73–1.58 (m, 3H), 1.58–1.48 (m, 2H), 1.34–1.23 (m, 1H), 1.23–1.10 (m, 3H), 1.06–0.92 (m, 2H). LCMS (FA):  $m/z = 479.6$  (M+H). HRMS  $m/z$  [M+H]<sup>+</sup> calcd for C<sub>21</sub>H<sub>31</sub>N<sub>6</sub>O<sub>5</sub>S 479.2077, obsd 479.2081.

## Synthesis of intermediate I-26

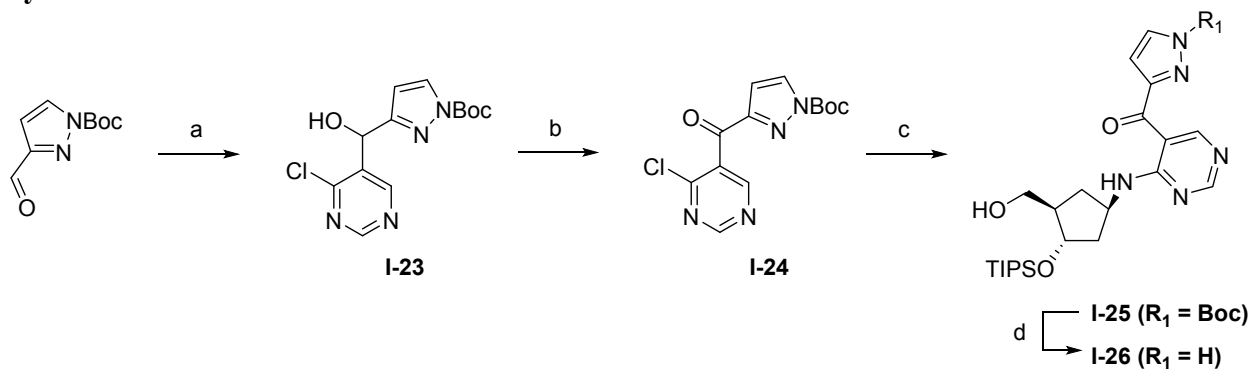

Reagents: (a) 4-chloro-5-iodopyrimidine, *n*-BuLi, THF, -95 °C to -78 °C, 0.5 h, 64%; (b) Dess-Martin periodinane, DCM, 40 °C, 2 h, 90%; (c) **I-8**, DIPEA, *i*-PrOH, rt, 16 h, 63%; (d) K<sub>3</sub>PO<sub>4</sub>, EtOH, rt, 2 h, 79%.

**Step 1: *tert*-Butyl 3-[(4-chloropyrimidin-5-yl)(hydroxy)methyl]-1H-pyrazole-1-carboxylate (I-23).** Into a flame dried round bottom flask with stir bar was added 4-chloro-5-iodopyrimidine (12.3 g, 51 mmol) dissolved in THF (200 mL). The flask was purged with argon and cooled to -95 °C. To this solution was added dropwise *n*-BuLi (2.5 M in hexane; 43 mL, 107 mmol) at -95 °C and the mixture was stirred for 10 min. To this mixture was added *tert*-butyl 3-formyl-1H-pyrazole-1-carboxylate (9.1 g, 46 mmol) dissolved in THF (30 mL) dropwise at -95 °C. The reaction was stirred at -78 °C for 30 min. The reaction was quenched with a solution of acetic

acid (7.9 mL) in THF (15 mL) and then allowed to warm to rt. Water (80 mL) was added and the mixture extracted with EtOAc three times. The combined organic layers were then washed with water and brine, dried over Na<sub>2</sub>SO<sub>4</sub>, filtered and concentrated. The crude product was purified on silica gel to give **I-23** (10.2 g, 64%). <sup>1</sup>H NMR (DMSO-*d*<sub>6</sub>) δ 9.01 (d, 2H, *J* = 4.8 Hz), 8.21 (d, 1H, *J* = 2.8 Hz), 6.61 (d, 1H, *J* = 5.0 Hz), 6.55 (d, 1H, *J* = 3.0 Hz), 5.98 (d, 1H, *J* = 5.0 Hz), 1.55 (s, 9H). LCMS (AA): *m/z* = 311.7 (M+H).

**Step 2: *tert*-Butyl 3-[(4-chloropyrimidin-5-yl)carbonyl]-1*H*-pyrazole-1-carboxylate (**I-24**).** *tert*-Butyl 3-[(4-chloropyrimidin-5-yl)(hydroxymethyl)-1*H*-pyrazole-1-carboxylate (1.0 g, 3.3 mmol) was dissolved in DCM (30 mL) and Dess-Martin periodinane (2.1 g, 4.9 mmol) was added to this solution. The mixture was then stirred at 40 °C for 2 h. TLC showed the reaction was done. The reaction was concentrated and purified on silica gel to provide **I-24** (0.92 g, 90%). <sup>1</sup>H NMR (CDCl<sub>3</sub>) δ 9.12 (s, 1H), 9.00 (s, 1H), 8.20 (d, 1H, *J* = 2.9 Hz), 7.09 (d, 1H, *J* = 2.8 Hz), 1.67 (s, 9H). LCMS (AA): *m/z* = 309.7 (M+H).

**Step 3: *tert*-Butyl 3-[[4-((1*R*,3*R*,4*S*)-3-(hydroxymethyl)-4-[(triisopropylsilyl)oxy]cyclopentyl)amino]pyrimidin-5-yl]carbonyl]-1*H*-pyrazole-1-carboxylate (**I-25**).** *tert*-Butyl 3-[(4-chloropyrimidin-5-yl)carbonyl]-1*H*-pyrazole-1-carboxylate (2.2 g, 7.1 mmol) was dissolved in *i*-PrOH (80 mL). *N,N*-Diisopropylethylamine (3.7 mL, 21 mmol) and {(1*R*,2*S*,4*R*)-4-amino-2-[(triisopropylsilyl)oxy]cyclopentyl}methanol-TFA (**I-8**, 2.9 g, 7.1 mmol) dissolved in *i*-PrOH (20 mL) was added to the solution and it was stirred at rt for 16 h. The reaction mixture was concentrated and the crude product was purified on silica gel to provide **I-25** (2.5 g, 63%). <sup>1</sup>H NMR (DMSO-*d*<sub>6</sub>) δ 9.44 (s, 1H), 9.06 (d, 1H, *J* = 7.3 Hz), 8.66 (s, 1H), 8.45 (d, 1H, *J* = 3.0 Hz), 7.01 (d, 1H, *J* = 3.0 Hz), 4.84–4.74 (m, 1H), 4.71 (t, 1H, *J* = 5.0 Hz), 4.31–4.25 (m, 1H), 3.47–3.37 (m, 2H), 2.40–2.31 (m, 1H), 2.08–1.98 (m, 2H), 1.85–1.77 (m, 1H), 1.62 (s, 9H), 1.34–1.25 (m, 1H), 1.07–1.02 (m, 21H). LCMS (AA): *m/z* = 560.8 (M+H).

**Step 4: [4-((1*R*,3*R*,4*S*)-3-(Hydroxymethyl)-4-[(triisopropylsilyl)oxy]cyclopentyl)amino]pyrimidin-5-yl[(1*H*-pyrazol-3-yl)methanone (**I-26**).** To a solution of *tert*-butyl 3-[[4-((1*R*,3*R*,4*S*)-3-(hydroxymethyl)-4-[(triisopropylsilyl)oxy]cyclopentyl)amino]pyrimidin-5-yl]carbonyl]-1*H*-pyrazole-1-carboxylate (1.7 g, 3.1 mmol) in EtOH (30 mL) was added a solution of K<sub>3</sub>PO<sub>4</sub> (1.4 g, 6.5 mmol) in water (4.5 mL). This mixture was stirred at rt for 2 h. Water was added to the mixture and it was extracted with DCM (50mL) twice. The combined extracts were dried over MgSO<sub>4</sub>, filtered, and concentrated. The residue was purified on silica gel to give **I-26** (1.13 g, 79%). <sup>1</sup>H NMR (CDCl<sub>3</sub>) δ 13.93 (br s, 1H) 10.15 (br s, 1H) 9.47 (br s, 1H) 8.72 (s, 1H) 7.72 (d, 1H, *J* = 2.5 Hz) 7.00 (d, 1H, *J* = 2.2 Hz) 4.94–4.81 (m, 1H) 4.40–4.32 (m, 1H) 3.78–3.69 (m, 2H) 2.60–2.49 (m, 1H) 2.30–2.18 (m, 2H) 1.97–1.83 (m, 2H) 1.43–1.32 (m, 1H) 1.10 (s, 21H). LCMS (FA): *m/z* = 460.4 (M+H).

## Synthesis of intermediate **I-27**

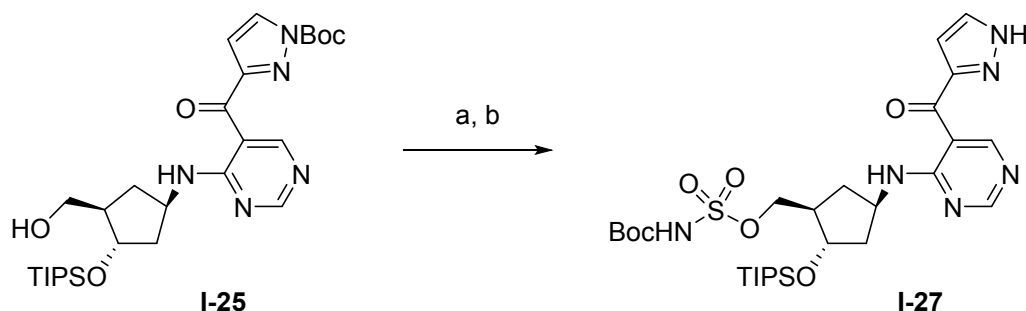

Reagents: (a) *tert*-butyl (chlorosulfonyl)carbamate, DIPEA, THF, 0 °C, 4 h; (b) K<sub>3</sub>PO<sub>4</sub>, EtOH, rt, 2 h, 56% for 2 steps.

**Step 1: *tert*-Butyl [({(1*R*,2*S*,4*R*)-4-{[5-(1*H*-pyrazol-3-ylcarbonyl)pyrimidin-4-yl]amino}-2-[(triisopropylsilyl)oxy]cyclopentyl)methoxy)sulfonyl]carbamate (I-27).** To a solution of *tert*-butyl 3-{[4-({(1*R*,3*R*,4*S*)-3-(hydroxymethyl)-4-[(triisopropylsilyl)oxy]cyclopentyl]amino)pyrimidin-5-yl]carbonyl}-1*H*-pyrazole-1-carboxylate (**I-25**, 2.5 g, 4.4 mmol) and *N,N*-diisopropylethylamine (2.3 g, 18 mmol) in THF (40 mL) was added *tert*-butyl (chlorosulfonyl)carbamate (1.9 g, 8.8 mmol) at 0 °C. It was then stirred at 0 °C for 4 h. The reaction solvent was evaporated and the residue was dissolved in EtOH (60 mL). A solution of K<sub>3</sub>PO<sub>4</sub> (0.47 g, 2.2 mmol) in water (4 mL) was then added and the resulting mixture stirred at rt for 2 h. The reaction solvent was evaporated and the crude product was purified on silica gel to provide **I-27** (1.6 g, 56%). LCMS (AA): *m/z* = 639.0 (M+H).

**General method for pyrazole alkylation of intermediate I-27 in library fashion for the preparation of compounds in Table 3**

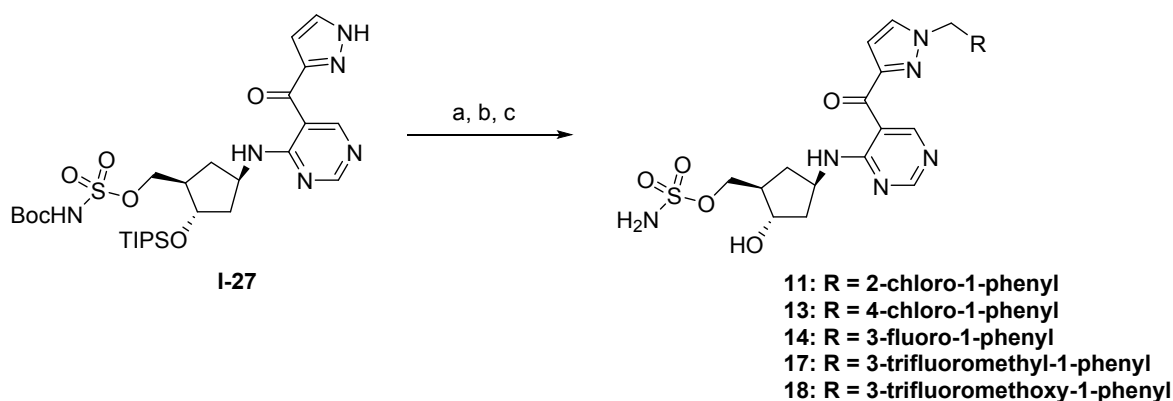

Reagents: (a) ArCH<sub>2</sub>Br, Cs<sub>2</sub>CO<sub>3</sub>, THF, rt, 4 h; (b) TFA, H<sub>2</sub>O, rt, 16 h; (c) MP PL-CO<sub>3</sub>, MeOH

### Step 1

To a 3-dram vial was added the substituted benzyl bromide (0.10 mmol), *tert*-butyl [({(1*R*,2*S*,4*R*)-4-{[5-(1*H*-pyrazol-3-ylcarbonyl)pyrimidin-4-yl]amino}-2-[(triisopropylsilyl)oxy]cyclopentyl)methoxy)sulfonyl]carbamate (**I-27**, 32.0 mg, 0.05 mmol) in THF (1.0 mL) followed by Cs<sub>2</sub>CO<sub>3</sub> (0.16 g, 0.50 mmol). The mixture was shaken at rt for 4 h then the mixture was



filtered to remove solids. To the clear THF solution was added TFA (3.0 mL), water (0.3 mL). This mixture was then shaken at rt for 16 h. The solvent was then evaporated and to the resulting residue was added MeOH (3.0 mL) and MP PL-CO<sub>3</sub> resin. After shaking at rt for 30 min, the resin was filtered off and rinsed with MeOH (10 mL). The solvent was then evaporated and purified by prep-HPLC to give the desired products.

### Synthesis of 11

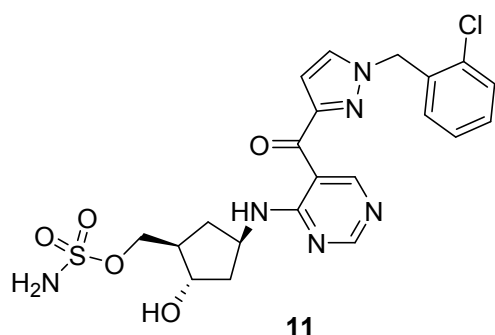

**{{(1R,2S,4R)-4-[(5-{[1-(2-Chlorobenzyl)-1H-pyrazol-3-yl]carbonyl}pyrimidin-4-yl)amino]-2-hydroxycyclopentyl}methyl sulfamate (11).**

Prepared by the general method described above using intermediate **I-27** and 1-(bromomethyl)-2-chlorobenzene as the starting material. LCMS (FA):  $m/z$  = 507.6 (M+H). HRMS  $m/z$  [M+H]<sup>+</sup> calcd for C<sub>21</sub>H<sub>24</sub>ClN<sub>6</sub>O<sub>5</sub>S 507.1217, obsd 507.1213.

### Synthesis of 13

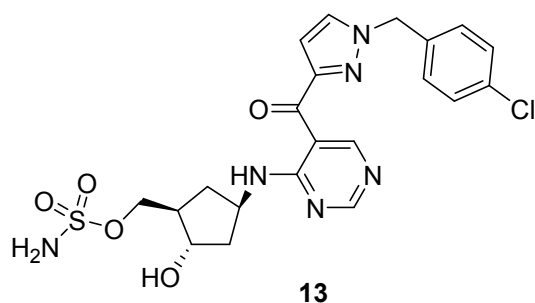

**{{(1R,2S,4R)-4-[(5-{[1-(4-Chlorobenzyl)-1H-pyrazol-3-yl]carbonyl}pyrimidin-4-yl)amino]-2-hydroxycyclopentyl}methyl sulfamate (13).**

Prepared by the general method described above using intermediate **I-27** and 1-(bromomethyl)-4-chlorobenzene as the starting material. LCMS (FA):  $m/z$  = 507.6 (M+H). HRMS  $m/z$  [M+H]<sup>+</sup> calcd for C<sub>21</sub>H<sub>24</sub>ClN<sub>6</sub>O<sub>5</sub>S 507.1217, obsd 507.1216.

### Synthesis of 14

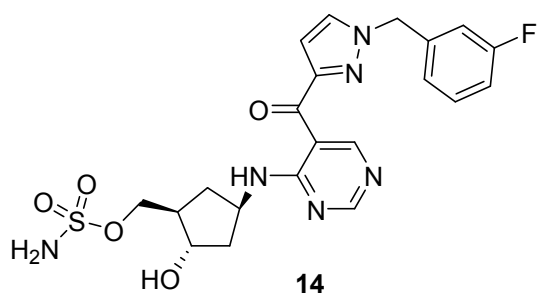

**{(1*R*,2*S*,4*R*)-4-[(5-{[1-(3-Fluorobenzyl)-1*H*-pyrazol-3-yl]carbonyl}pyrimidin-4-yl)amino]-2-hydroxycyclopentyl}methyl sulfamate (14).**

Prepared by the general method described above using intermediate **I-27** and 1-(bromomethyl)-3-fluorobenzene as the starting material. LCMS (FA):  $m/z$  = 491.5 (M+H). HRMS  $m/z$  [M+H]<sup>+</sup> calcd for C<sub>21</sub>H<sub>24</sub>FN<sub>6</sub>O<sub>5</sub>S 491.1513, obsd 491.1512.

### Synthesis of 17

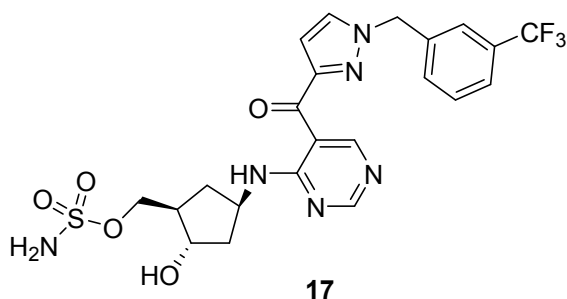

**[(1*R*,2*S*,4*R*)-2-Hydroxy-4-{[5-({1-[3-(trifluoromethyl)benzyl]-1*H*-pyrazol-3-yl}carbonyl)pyrimidin-4-yl]amino}cyclopentyl]methyl sulfamate (17).**

Prepared by the general method described above using intermediate **I-27** and 3-(trifluoromethyl)benzyl bromide as the starting material. LCMS (FA):  $m/z$  = 541.0 (M+H). HRMS  $m/z$  [M+H]<sup>+</sup> calcd for C<sub>22</sub>H<sub>24</sub>F<sub>3</sub>N<sub>6</sub>O<sub>5</sub>S 541.1481, obsd 541.1480.

### Synthesis of 18

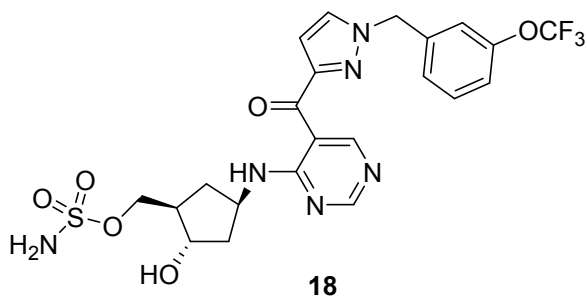

**[(1*R*,2*S*,4*R*)-2-Hydroxy-4-{[5-({1-[3-(trifluoromethoxy)benzyl]-1*H*-pyrazol-3-yl}carbonyl)pyrimidin-4-yl]amino}cyclopentyl]methyl sulfamate (18).**

Prepared by the general method described above using intermediate **I-27** and 1-(bromomethyl)-3-(trifluoromethoxy)benzene as the starting material. LCMS (FA):  $m/z = 557.0$  (M+H). HRMS  $m/z$  [M+H]<sup>+</sup> calcd for C<sub>22</sub>H<sub>24</sub>F<sub>3</sub>N<sub>6</sub>O<sub>6</sub>S 557.1430, obsd 557.1432.

### General method for pyrazole alkylation of intermediate **I-26** for the preparation of compounds in Table 3

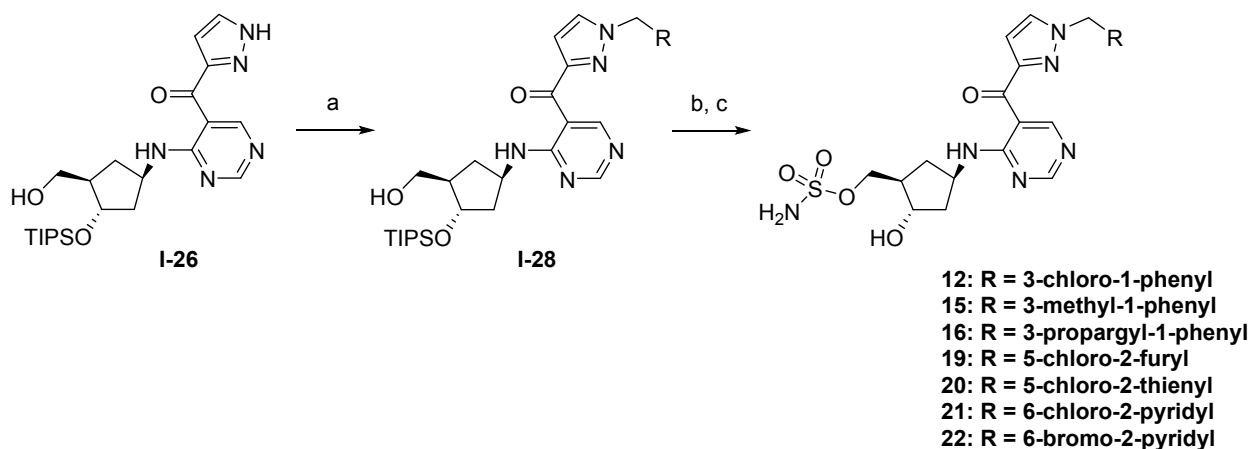

Reagents: (a) ArCH<sub>2</sub>X, Cs<sub>2</sub>CO<sub>3</sub>, THF, rt, 20 h; (b) chlorosulfonamide, TEA, DMF, rt, 2 h; (c) 4N HCl, THF, 5 h, 40 °C.

#### Step 1

[4-((1*R*,3*R*,4*S*)-3-(Hydroxymethyl)-4-[(triisopropylsilyl)oxy]cyclopentyl)amino)pyrimidin-5-yl](1*H*-pyrazol-3-yl)methanone (**I-26**, 0.64 g, 1.4 mmol) was dissolved in THF (25 mL). To this solution was added Cs<sub>2</sub>CO<sub>3</sub> (1.6 g, 4.9 mmol) and the substituted benzyl halide (2.1 mmol) and the reaction was stirred at rt for 20 h. The reaction was filtered and the filtrate concentrated. The residue was purified on silica gel to give the desired product, **I-28**.

#### Step 2

To a solution of the above alcohol (**I-28**, 1.16 mmol) and triethylamine (0.5 mL, 2.4 mmol) in DMF (10 mL) was added chlorosulfonamide (400 mg, 3.3 mmol) at rt, and the mixture was stirred for 2 h. The reaction was quenched by addition of a saturated solution of NaHCO<sub>3</sub> and diluted with water. The mixture was extracted with EtOAc four times. The combined organic layers were dried over MgSO<sub>4</sub>, filtered, and concentrated. The residue was purified on silica gel to give the sulfamate intermediate which was dissolved in THF (7 mL) and HCl (4.0 M in water; 7 mL, 28 mmol) was added to the solution. The reaction was stirred for 5 h at 40 °C. The reaction was cooled to rt and quenched by the addition of a saturated solution of NaHCO<sub>3</sub> and extracted with EtOAc four times. The combined organic layers were dried over MgSO<sub>4</sub>, filtered, and concentrated. The residue was triturated with the addition of DCM to give the desired product.

#### Synthesis of 12

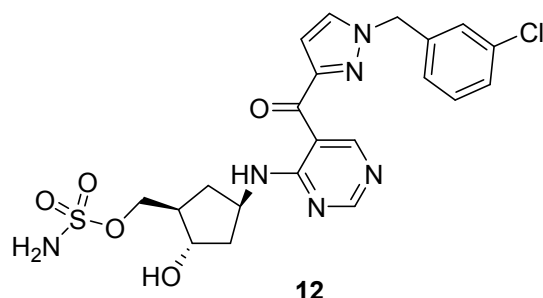

**((1R,2S,4R)-4-((5-(1-(3-Chlorobenzyl)-1H-pyrazole-3-carbonyl)pyrimidin-4-yl)amino)-2-hydroxycyclopentyl)methyl sulfamate (12).**

Prepared by the general method described above using intermediate **I-26** and 1-(bromomethyl)-3-chlorobenzene as the starting material. <sup>1</sup>H NMR (MeOD) δ 9.84 (s, 1H), 9.69 (s, 1H), 9.23 (s, 1H), 8.84–8.69 (m, 1H), 7.90 (d, 1H, *J* = 2.4 Hz), 7.38–7.28 (m, 3H), 7.27–7.19 (m, 1H), 7.04 (d, 1H), 5.48 (s, 2H), 5.01–4.92 (m, 1H), 4.26–4.10 (m, 3H), 2.57–2.49 (m, 1H), 2.36–2.24 (m, 1H), 2.24–2.13 (m, 1H), 2.08–1.95 (m, 1H), 1.61–1.50 (m, 1H). LCMS (FA): *m/z* = 507.1 (M+H). HRMS *m/z* [M+H]<sup>+</sup> calcd for C<sub>21</sub>H<sub>24</sub>ClN<sub>6</sub>O<sub>5</sub>S 507.1217, obsd 507.1215.

**Synthesis of 15**

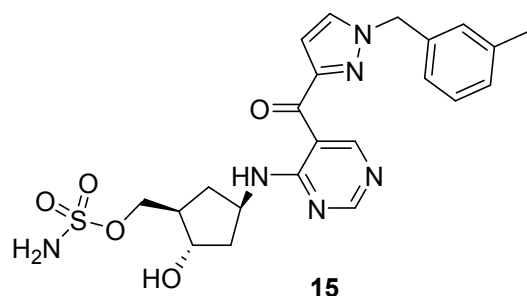

**{(1R,2S,4R)-2-Hydroxy-4-[(5-{[1-(3-methylbenzyl)-1H-pyrazol-3-yl]carbonyl}pyrimidin-4-yl)amino]cyclopentyl)methyl sulfamate (15).**

Prepared by the general method described above using intermediate **I-26** and 1-(chloromethyl)-3-methylbenzene as the starting material. <sup>1</sup>H NMR (MeOD) δ 9.63 (s, 1H), 8.56 (s, 1H), 7.78 (d, 1H, *J* = 2.4 Hz), 7.27–7.22 (m, 1H), 7.16–7.08 (m, 3H), 6.93 (d, 1H, *J* = 2.4 Hz), 5.42 (s, 2H), 4.86–4.77 (m, 1H), 4.25–4.13 (m, 3H), 2.58–2.49 (m, 1H), 2.33 (s, 3H), 2.31–2.23 (m, 1H), 2.22–2.14 (m, 1H), 1.97–1.88 (m, 1H), 1.44 (dt, 1H, *J* = 13.0, 9.0 Hz). LCMS (FA): *m/z* = 487.4 (M+H). HRMS *m/z* [M+H]<sup>+</sup> calcd for C<sub>22</sub>H<sub>27</sub>N<sub>6</sub>O<sub>5</sub>S 487.1764, obsd 487.1763.

**Synthesis of 16**

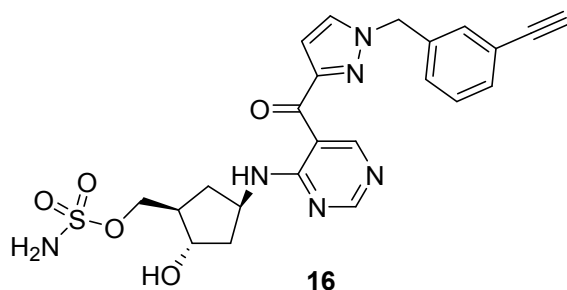

**{(1*R*,2*S*,4*R*)-4-[(5-{[1-(3-Ethynylbenzyl)-1*H*-pyrazol-3-yl]carbonyl}pyrimidin-4-yl)amino]-2-hydroxycyclopentyl}methyl sulfamate (16).**

Prepared by the general method described above using intermediate **I-26** and 3-ethynylbenzyl methanesulfonate **I-30** as the starting material. <sup>1</sup>H NMR (MeOD) δ 9.62 (s, 1H), 8.56 (s, 1H), 7.84 (d, 1H, *J* = 2.4 Hz), 7.44–7.30 (m, 4H), 6.96 (d, 1H, *J* = 2.4 Hz), 5.47 (s, 2H), 4.86–4.77 (m, 1H), 4.19 (m, 3H), 3.51 (s, 1H), 2.58–2.48 (m, 1H), 2.33–2.22 (m, 1H), 2.22–2.14 (m, 1H), 1.98–1.87 (m, 1H), 1.44 (dt, 1H, *J* = 13.0, 9.1 Hz). LCMS (FA): *m/z* = 497.5 (M+H). HRMS *m/z* [M+H]<sup>+</sup> calcd for C<sub>23</sub>H<sub>25</sub>N<sub>6</sub>O<sub>5</sub>S 497.1607, obsd 497.1606.

**Synthesis of 19**

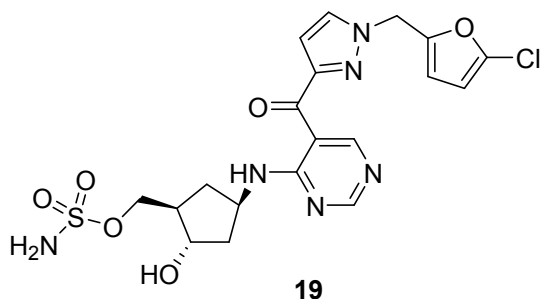

**[(1*R*,2*S*,4*R*)-4-{[5-([1-(5-Chloro-2-furyl)methyl]-1*H*-pyrazol-3-yl]carbonyl)pyrimidin-4-yl]amino}-2-hydroxycyclopentyl]methyl sulfamate (19).**

Prepared by the general method described above using intermediate **I-26** and 2-(bromomethyl)-5-chlorofuran as the starting material. LCMS (FA): *m/z* = 497.3 (M+H). HRMS *m/z* [M+H]<sup>+</sup> calcd for C<sub>19</sub>H<sub>22</sub>ClN<sub>6</sub>O<sub>6</sub>S 497.1010, obsd 497.1012.

**Synthesis of 20**

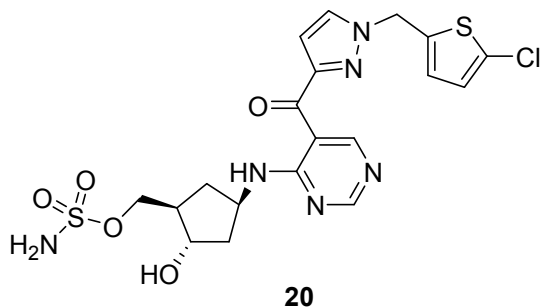

**[(1*R*,2*S*,4*R*)-4-{{5-({1-[(5-Chloro-2-thienyl)methyl]-1*H*-pyrazol-3-yl}carbonyl)pyrimidin-4-yl}amino}-2-hydroxycyclopentyl]methyl sulfamate (20).**

Prepared by the general method described above using intermediate **I-26** and 2-(bromomethyl)-5-chlorothiophene as the starting material. The following alternative conditions were employed in the reaction scheme: Step 2: desilylating agent/solvent used was TFA/water. LCMS (FA):  $m/z$  = 513.0 (M+H). HRMS  $m/z$  [M+H]<sup>+</sup> calcd for C<sub>19</sub>H<sub>22</sub>ClN<sub>6</sub>O<sub>5</sub>S<sub>2</sub> 513.0782, obsd 513.0779.

### Synthesis of 21

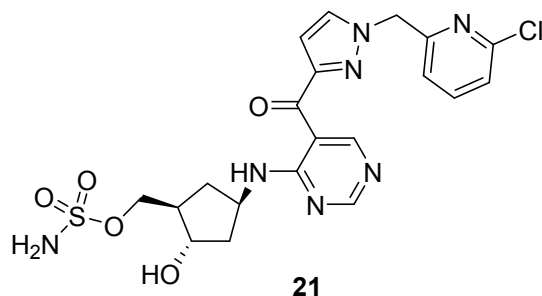

**[(1*R*,2*S*,4*R*)-4-{{5-({1-[(6-Chloropyridin-2-yl)methyl]-1*H*-pyrazol-3-yl}carbonyl)pyrimidin-4-yl}amino}-2-hydroxycyclopentyl]methyl sulfamate (21).**

Prepared by the general method described above using intermediate **I-26** and 2-(bromomethyl)-6-chloropyridine as the starting material. <sup>1</sup>H NMR (DMSO-*d*<sub>6</sub>) δ 9.41 (s, 1H), 8.99 (d, 1H, *J* = 7.2 Hz), 8.62 (s, 1H), 8.10 (d, 1H, *J* = 2.4 Hz), 7.88 (t, 1H, *J* = 7.8 Hz), 7.48 (d, 1H, *J* = 7.9 Hz), 7.43 (s, 2H), 7.18 (d, 1H, *J* = 7.6 Hz), 6.94 (d, 1H, *J* = 2.4 Hz), 5.63 (s, 2H), 4.91 (d, 1H, *J* = 4.5 Hz), 4.71 (dd, 1H, *J* = 16.0, 7.8 Hz), 4.10 (dd, 1H, *J* = 9.7, 5.9 Hz), 4.01–3.94 (m, 2H), 2.41–2.31 (m, 1H), 2.18–2.08 (m, 1H), 2.04–1.96 (m, 1H), 1.83–1.73 (m, 1H), 1.28 (dt, 1H, *J* = 12.9, 9.2 Hz). LCMS (FA):  $m/z$  = 508.0 (M+H). HRMS  $m/z$  [M+H]<sup>+</sup> calcd for C<sub>20</sub>H<sub>23</sub>ClN<sub>7</sub>O<sub>5</sub>S 508.1170, obsd 508.1167.

### Synthesis of 22

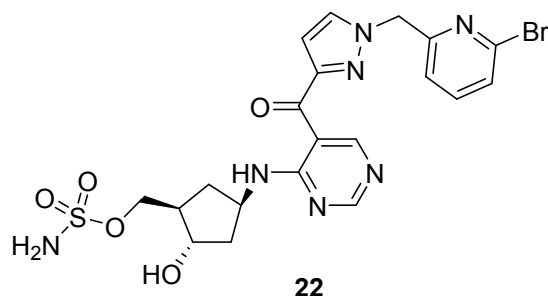

**[(1*R*,2*S*,4*R*)-4-{{5-({1-[(6-Bromopyridin-2-yl)methyl]-1*H*-pyrazol-3-yl}carbonyl)pyrimidin-4-yl}amino}-2-hydroxycyclopentyl]methyl sulfamate (22).**

Prepared by the general method described above using intermediate **I-26** and 2-bromo-6-bromomethyl-pyridine as the starting material. <sup>1</sup>H NMR (DMSO-*d*<sub>6</sub>) δ 9.43 (s, 1H), 9.00 (d, 1H,

$J = 7.4$  Hz), 8.63 (s, 1H), 8.11 (d, 1H,  $J = 2.4$  Hz), 7.78 (t, 1H,  $J = 7.8$  Hz), 7.62 (d, 1H,  $J = 7.9$  Hz), 7.45 (s, 2H), 7.21 (d, 1H,  $J = 7.5$  Hz), 6.95 (d, 1H,  $J = 2.4$  Hz), 5.64 (s, 2H), 4.92 (d, 1H,  $J = 4.3$  Hz), 4.78–4.66 (m, 1H), 4.12 (dd, 1H,  $J = 9.7, 5.9$  Hz), 4.03–3.94 (m, 2H), 2.42–2.31 (m, 1H), 2.20–2.08 (m, 1H), 2.06–1.96 (m, 1H), 1.84–1.74 (m, 1H), 1.29 (dt, 1H,  $J = 12.8, 9.2$  Hz). LCMS (FA):  $m/z = 554.4$  (M+H). HRMS  $m/z$  [M+H]<sup>+</sup> calcd for C<sub>20</sub>H<sub>23</sub>BrN<sub>7</sub>O<sub>5</sub>S 552.0665, obsd 552.0659.

### Synthesis of intermediate I-30

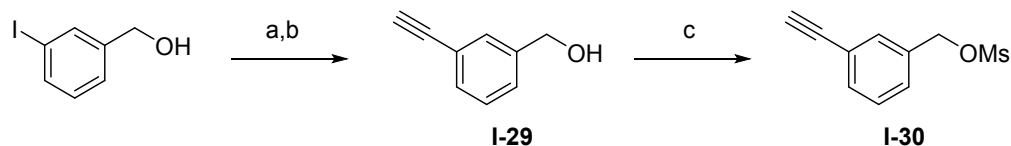

Reagents: (a) (trimethylsilyl)acetylene, Pd(PPh<sub>3</sub>)<sub>2</sub>Cl<sub>2</sub>, CuI, TEA, 100 °C, 2 h, 52%; (b) K<sub>2</sub>CO<sub>3</sub>, MeOH, rt, 1 h, 97%; (c) MsCl, TEA, DCM, 0 °C, 1 h, 82%.

**Step 1: (3-Ethynylphenyl)methanol (I-29).** A reaction vial was charged with 3-iodobenzyl alcohol (1.0 g, 4.27 mmol), Pd(PPh<sub>3</sub>)<sub>2</sub>Cl<sub>2</sub> (60 mg, 0.08 mmol), CuI (33 mg, 0.17 mmol), and triethylamine (5.0 mL, 36 mmol). The vial was purged with argon and then sealed with a cap. After sonication, (trimethylsilyl)acetylene (0.90 mL, 6.4 mmol) was added to the mixture, and the resulting mixture was heated at 100 °C for 2 h. The reaction was diluted with EtOAc (100 mL) and the EtOAc layer was washed with 1 M HCl (60 mL) twice, water (60 mL) and brine (60 mL). The organic layer was dried over Na<sub>2</sub>SO<sub>4</sub>, filtered, and concentrated *in vacuo*. The residue was purified on silica gel to give the TMS protected alkyne (855 mg, 98%) as light yellow oil. <sup>1</sup>H NMR (CDCl<sub>3</sub>) δ 7.50 (s, 1H), 7.42–7.38 (m, 1H), 7.35–7.28 (m, 2H), 4.68 (s, 2H), 0.26 (s, 9H). To a solution of alkyne (1.30 g, 6.4 mmol) in MeOH (15 mL) was added K<sub>2</sub>CO<sub>3</sub> (4.40 g, 31.8 mmol) at rt, and the mixture was stirred for 1 h. The reaction was concentrated *in vacuo*. To the residue was added water (100 mL) and extracted with Et<sub>2</sub>O (100 mL) three times. The combined organic layers were dried over Na<sub>2</sub>SO<sub>4</sub>, filtered, and concentrated *in vacuo*. The residue was purified by silica gel column chromatography to give **I-29** (813 mg, 97%) as a light yellow oil. <sup>1</sup>H NMR (CDCl<sub>3</sub>) δ 7.52 (s, 1H), 7.43 (br d, 1H,  $J = 7.3$  Hz), 7.40–7.30 (m, 2H), 4.70 (s, 2H), 3.08 (s, 1H), 1.69 (br s, 1H).

**Step 2: 3-Ethynylbenzyl methanesulfonate (I-30).** To a solution of (3-ethynylphenyl)methanol (106 mg, 0.80 mmol) in DCM (7 mL) was added triethylamine (0.17 mL, 1.2 mmol) followed by MsCl (65 μL, 0.84 mmol) at 0 °C under an atmosphere of argon. The mixture was stirred for 1 h. The reaction was quenched by addition of water (50 mL) and DCM (50 mL). After separation, the DCM layer was washed with water (50 mL) followed by brine (50 mL) and then dried over Na<sub>2</sub>SO<sub>4</sub>. The mixture was filtered and concentrated *in vacuo*. The residue was purified on silica gel to give **I-30** (138 mg, 82%) as a colorless oil. <sup>1</sup>H NMR (CDCl<sub>3</sub>) δ 7.50–7.60 (m, 2H), 7.35–7.45 (m, 2H), 5.23 (s, 2H), 3.15 (s, 1H), 2.95 (s, 3H).

### Synthesis of cyclopentane intermediate I-31

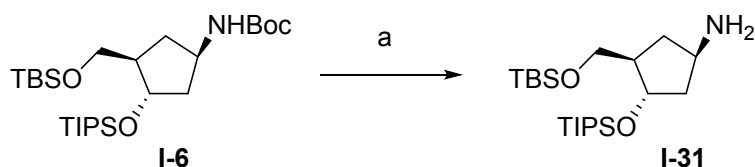

Reagents: (a) ZnBr<sub>2</sub>, EtOH, DCM, rt, 37 h, 91%.

**Step 1: (1*R*,3*R*,4*S*)-3-([*tert*-Butyl(dimethyl)silyl]oxy)methyl)-4-[(triisopropylsilyl)oxy]cyclopentanamine (**I-31**).** To solution of *tert*-butyl {(1*R*,3*R*,4*S*)-3-([*tert*-butyl(dimethyl)silyl]oxy)methyl)-4-[(triisopropylsilyl)oxy]cyclopentyl} carbamate (**I-6**, 1.5 g, 3.0 mmol) in DCM (100 mL) was added EtOH (0.38 mL, 6.6 mmol) followed by zinc bromide (5.4 g, 24 mmol) at rt, and the mixture was stirred for 37 h. The reaction was quenched by addition of 1N NaOH (100 mL) and extracted with DCM (100 mL) five times. The combined organic layers were washed with brine and then dried over Na<sub>2</sub>SO<sub>4</sub>. After filtration, the filtrate was concentrated in vacuo. The residue was purified on silica gel to give **I-31** (1.09 g, 91%) as a colorless oil. <sup>1</sup>H NMR (MeOD) δ 4.33–4.4.29 (m, 1H), 3.63 (dd, 1H, *J* = 10.0, 5.5 Hz), 3.58 (dd, 1H, *J* = 10.0, 6.0 Hz), 3.53–3.44 (m, 1H), 2.22–2.13 (m, 1H), 2.11–2.02 (m, 1H), 1.92 (ddd, 1H, *J* = 12.7, 6.8, 3.1 Hz), 1.57 (ddd, 1H, *J* = 12.7, 9.0, 6.0 Hz), 1.09–0.96 (m, 22H), 0.82 (s, 9H), 0.07 (s, 6H). LCMS (FA): *m/z* = 402.6 (M+H).

## Synthesis of ML-792

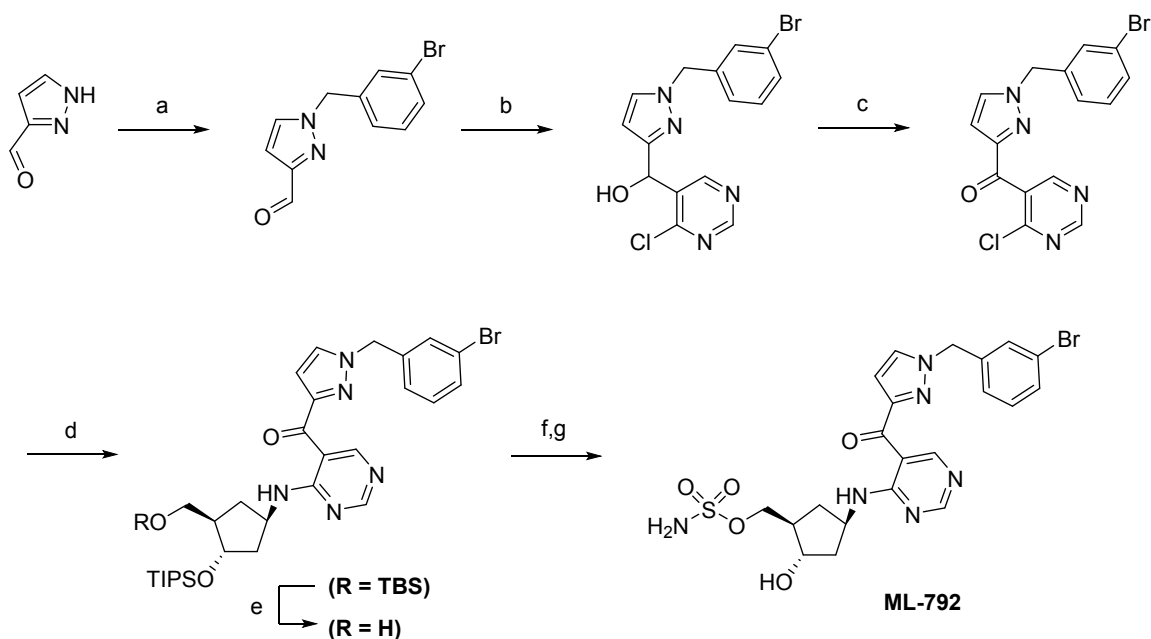

Reagents: (a) 3-bromobenzyl bromide, K<sub>2</sub>CO<sub>3</sub>, DMF, rt, 14 h, 76%; (b) 4-chloro-5-iodopyrimidine, *n*-BuLi, THF, -78 °C, 0.5 h, 71%; (c) MnO<sub>2</sub>, DCM, rt, 12 h, 94%; (d) **I-31**, K<sub>2</sub>CO<sub>3</sub>, DMF, rt, 12 h, 94%; (e) 1% HCl in EtOH, EtOH, 4 °C for 14 h followed by rt for 9 h, 90%; (f) chlorosulfonamide, DMF, 0 °C, 20 min, 86%; (g) 4N HCl, THF, rt, 14 h, 90%.

**{(1*R*,2*S*,4*R*)-4-[(5-{[1-(3-Bromobenzyl)-1*H*-pyrazol-3-yl]carbonyl}pyrimidin-4-yl)amino]-2-hydroxycyclopentyl}methyl sulfamate (ML-792).**



For a detailed synthesis see: He, X. et al. *Nature Chemical Biology* **2017**, 13(11), 1164-1171. MP: 137-138 °C; <sup>1</sup>H NMR (DMSO-*d*<sub>6</sub>) δ 9.44 (s, 1H), 9.00 (d, 1H, *J* = 7.4 Hz), 8.63 (s, 1H), 8.09 (d, 1H, *J* = 2.4 Hz), 7.56–7.50 (m, 2H), 7.43 (s, 2H), 7.37–7.31 (m, 1H), 7.28 (d, 1H, *J* = 7.7 Hz), 6.91 (d, 1H, *J* = 2.4 Hz), 5.52 (s, 2H), 4.91 (d, 1H, *J* = 4.3 Hz), 4.77–4.65 (m, 1H), 4.10 (dd, 1H, *J* = 9.7, 5.9 Hz), 4.01–3.93 (m, 2H), 2.41–2.31 (m, 1H), 2.18–2.08 (m, 1H), 2.05–1.95 (m, 1H), 1.78 (ddd, 1H, *J* = 13.2, 8.4, 6.9 Hz), 1.28 (dt, 1H, *J* = 12.8, 9.2 Hz). <sup>13</sup>C NMR (DMSO-*d*<sub>6</sub>) δ 186.4, 161.2, 160.4, 159.8, 150.4, 139.3, 132.5, 130.9, 130.8, 130.4, 126.7, 121.8, 110.9, 109.1, 71.4, 70.4, 54.7, 48.7, 45.9, 40.9, 34.2. LCMS (FA): *m/z* = 553.3 (M+H). HRMS *m/z* [M+H]<sup>+</sup> calcd for C<sub>21</sub>H<sub>24</sub>BrN<sub>6</sub>O<sub>5</sub>S 551.0707, obsd 551.0703; analysis (%calcd, %found for C<sub>21</sub>H<sub>23</sub>BrN<sub>6</sub>O<sub>5</sub>S: C (45.74, 45.76), H (4.20, 4.30), Br (14.49, 14.74), N (15.24, 15.51), S (5.81, 5.94).

## Procedures for the syntheses of compounds in Table 4

### Synthesis of 23

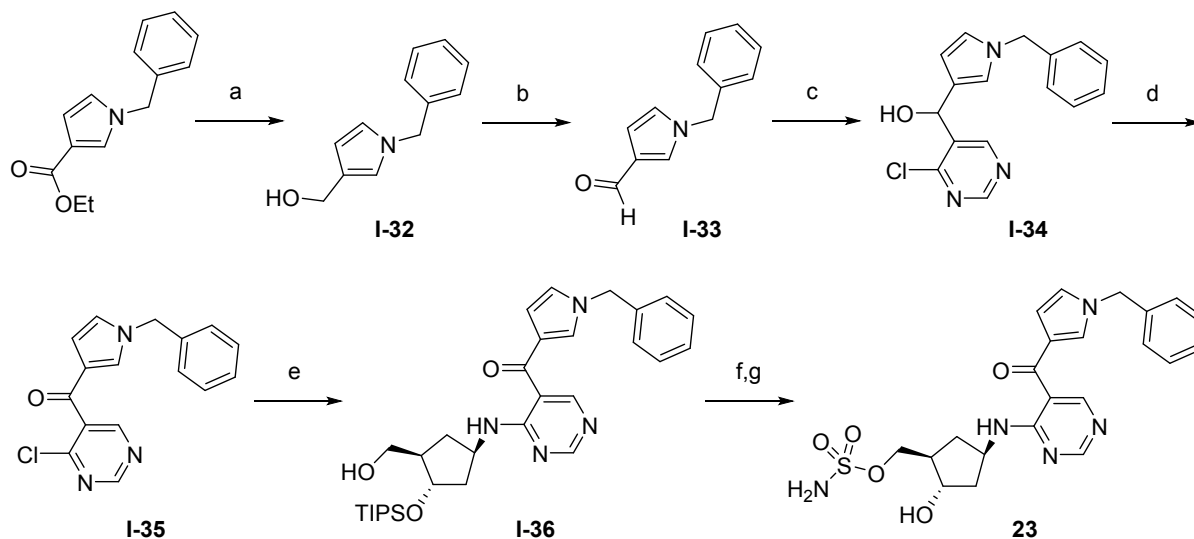

Reagents: (a) LAH, THF, 50 °C, 4 h, 88%; (b) MnO<sub>2</sub>, DCM, rt, 19 h, 83%; (c) 4-chloro-5-iodopyrimidine, *n*-BuLi, -78 °C, 2 h, 41%; (d) MnO<sub>2</sub>, DCM, rt, 19 h, 83%; (e) **I-8**, DIPEA, 2-PrOH, rt, 20 h, 42%; (f) chlorosulfonamide, DMF, rt, 1 h; (g) 4N HCl, THF, rt, 3 h, 36% for 2 steps.

**Step 1: (1-Benzyl-1*H*-pyrrol-3-yl)methanol (**I-32**).** A solution of lithium aluminum hydride (0.66 g, 17 mmol) in THF (100 mL) was stirred at 0 °C. A solution of 1-benzylpyrrole-3-carboxylic acid ethyl ester (2.0 g, 8.7 mmol) in THF (10 mL) was added dropwise. The resulting reaction mixture was heated at 50 °C for 3 h. Additional lithium aluminum hydride (0.75 g, 20 mmol) was added and the reaction continued to stir at 50 °C for 1 h. The reaction mixture was then cooled to 0 °C, and sodium sulfate decahydrate (8 g) was added and the mixture was stirred for 16 h. EtOAc was added and the mixture was filtered over a pad of celite, then washed with additional EtOAc. The filtrate was concentrated and the crude residue purified on silica gel to give **I-32** (1.4 g, 88%). <sup>1</sup>H NMR (DMSO-*d*<sub>6</sub>) δ 7.35–7.30 (m, 2H), 7.28–7.23 (m, 1H), 7.21–7.17

(m, 2H), 6.73 (dd, 1H,  $J = 2.5, 2.3$  Hz), 6.70–6.68 (m, 1H), 5.98–5.95 (m, 1H), 5.02 (s, 2H), 4.56 (t, 1H,  $J = 5.5$  Hz), 4.27 (d, 2H,  $J = 5.5$  Hz). LCMS (FA):  $m/z = 188.4$  (M+H).

**Step 2: 1-Benzyl-1H-pyrrole-3-carbaldehyde (I-33).** To a solution of (1-benzyl-1H-pyrrol-3-yl)methanol (1.4 g, 7.7 mmol) in DCM (39 mL) was added  $\text{MnO}_2$  (6.7 g, 77 mmol). The suspension was stirred for 19 h at rt. The reaction was then filtered through a celite pad and the residual solid was washed with DCM several times. The filtrate was then concentrated in vacuo and the residue was purified on silica gel to afford **I-33** (1.2 g, 83%).  $^1\text{H}$  NMR ( $\text{DMSO}-d_6$ )  $\delta$  9.64 (s, 1H), 7.73 (t, 1H,  $J = 1.9$  Hz), 7.39–7.34 (m, 2H), 7.33–7.26 (m, 3H), 6.99 (t, 1H,  $J = 2.1$  Hz), 6.47 (dd, 1H,  $J = 2.9, 1.6$  Hz), 5.20 (s, 2H). LCMS (AA):  $m/z = 186.1$  (M+H).

**Step 3: (1-Benzyl-1H-pyrrol-3-yl)(4-chloropyrimidin-5-yl)methanol (I-34).** Into a flame dried round bottom flask with stir bar was added 4-chloro-5-iodopyrimidine (1.4 g, 5.8 mmol) dissolved in THF (40 mL). The flask was purged with argon and cooled to  $-78^\circ\text{C}$ . To this solution was added dropwise  $n\text{-BuLi}$  (2.5 M in hexane; 4.6 mL, 11.5 mmol) at  $-78^\circ\text{C}$  and the mixture was stirred for 30 min. To this mixture was added 1-benzyl-1H-pyrrole-3-carbaldehyde (1.2 g, 6.3 mmol) dissolved in THF (10 mL) dropwise. The reaction was stirred at  $-78^\circ\text{C}$  for 2 h. The reaction was quenched with a saturated solution of  $\text{NH}_4\text{Cl}$  and then extracted with EtOAc three times. The combined organic layers were then washed with water and brine, dried over  $\text{Na}_2\text{SO}_4$ , filtered and concentrated. The crude product was purified on silica gel to give **I-34** (0.70 g, 41%). LCMS (AA):  $m/z = 300.2$  (M+H).

**Step 4: (1-Benzyl-1H-pyrrol-3-yl)(4-chloropyrimidin-5-yl)methanone (I-35).** To a solution of (1-benzyl-1H-pyrrol-3-yl)(4-chloropyrimidin-5-yl)methanol (0.70 g, 2.4 mmol) in DCM (23 mL) was added  $\text{MnO}_2$  (2.0 g, 23 mmol). The suspension was stirred for 19 h at rt. The reaction was then filtered through a celite pad and the residual solid was washed with DCM several times. The filtrate was then concentrated in vacuo and the residue was purified on silica gel to afford **I-35** (0.59 g, 83%).  $^1\text{H}$  NMR ( $\text{CDCl}_3$ )  $\delta$  9.07 (s, 1H), 8.72 (s, 1H), 7.41–7.32 (m, 3H), 7.19–7.15 (m, 3H), 6.75–6.73 (m, 1H), 6.63 (dd, 1H,  $J = 2.8, 1.8$  Hz), 5.09 (s, 2H). LCMS (FA):  $m/z = 298.4$  (M+H).

**Step 5: (1-Benzyl-1H-pyrrol-3-yl)[4-((1R,3R,4S)-3-(hydroxymethyl)-4-[(triisopropylsilyl)oxy]cyclopentyl)amino]pyrimidin-5-yl]methanone (I-36).** (1-Benzyl-1H-pyrrol-3-yl)(4-chloropyrimidin-5-yl)methanone (147 mg, 0.49 mmol) and {(1R,2S,4R)-4-amino-2-[(triisopropylsilyl)oxy]cyclopentyl}methanol-TFA (**I-8**, 180 mg, 0.45 mmol) were weighed into a reaction vessel with stir bar. To this mixture was added 2-PrOH (5 mL) and  $N,N$ -diisopropylethylamine (0.24 mL, 1.35 mmol). The resulting mixture was allowed to stir at rt for 20 h. The reaction was then concentrated and the crude product was purified on silica gel to afford **I-36** (104 mg, 42%). LCMS (FA):  $m/z = 549.7$  (M+H).

**Step 6: [(1R,2S,4R)-4-({5-[(1-Benzyl-1H-pyrrol-3-yl)carbonyl]pyrimidin-4-yl}amino)-2-hydroxycyclopentyl]methyl sulfamate (23).**

To a solution of (1-benzyl-1H-pyrrol-3-yl)[4-((1R,3R,4S)-3-(hydroxymethyl)-4-[(triisopropylsilyl)oxy]cyclopentyl)amino]pyrimidin-5-yl]methanone (0.12 g, 0.21 mmol) in DMF (4 mL) was added chlorosulfonamide (74 mg, 0.64 mmol) at rt, and the mixture was stirred for 1 h. The reaction was quenched by addition of a saturated solution of  $\text{NaHCO}_3$  and diluted

with water. The mixture was extracted with EtOAc four times. The combined organic layers were dried over MgSO<sub>4</sub>, filtered, and concentrated. The crude sulfamate intermediate was dissolved in THF (2 mL) and HCl (4.0 M in water; 2.1 mL, 8.4 mmol) was added to the solution. The reaction was stirred for 3 h at rt. The reaction was quenched by the addition of a saturated solution of NaHCO<sub>3</sub> and extracted with EtOAc four times. The combined organic layers were dried over MgSO<sub>4</sub>, filtered, and concentrated. The residue was purified by prep HPLC to afford **23** (26 mg, 36%). <sup>1</sup>H NMR (DMSO-*d*<sub>6</sub>) δ 8.66 (s, 1H), 8.60 (s, 1H), 8.44 (d, 1H, *J* = 7.4 Hz), 7.67 (s, 1H), 7.50–7.33 (m, 3H), 7.30 (t, 3H, *J* = 6.3 Hz), 7.00 (s, 1H), 6.54 (s, 1H), 5.21 (s, 2H), 5.05–4.75 (m, 1H), 4.74–4.57 (m, 1H), 4.15–4.03 (m, 1H), 4.03–3.88 (m, 2H), 2.96–2.52 (m, 1H), 2.40–2.25 (m, 1H), 2.20–2.05 (m, 1H), 2.03–1.90 (m, 1H), 1.79–1.66 (m, 1H), 1.31–1.18 (m, 1H). LCMS (FA): *m/z* = 472.5 (M+H). HRMS *m/z* [M+H]<sup>+</sup> calcd for C<sub>22</sub>H<sub>26</sub>N<sub>5</sub>O<sub>5</sub>S 472.1655, obsd 472.1666.

### Synthesis of 24

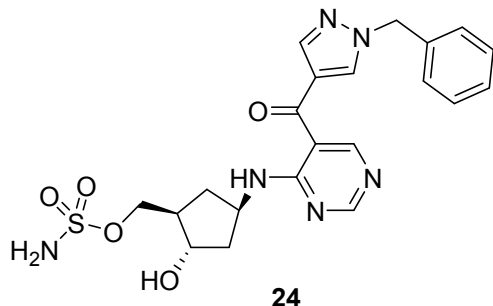

### [(1*R*,2*S*,4*R*)-4-({5-[(1-Benzyl-1*H*-pyrazol-4-yl)carbonyl]pyrimidin-4-yl}amino)-2-hydroxycyclopentyl]methyl sulfamate (**24**).

Prepared by the method described for the preparation of **23** using ethyl 1-benzyl-1*H*-pyrazole-4-carboxylate as the starting material in Step 1. <sup>1</sup>H NMR (MeOD) δ 8.73 (s, 1H), 8.57 (s, 1H), 8.35 (s, 1H), 7.98 (s, 1H), 7.38–7.30 (m, 5H), 5.42 (s, 2H), 4.83–4.75 (m, 1H), 4.21–4.13 (m, 3H), 2.55–2.47 (m, 1H), 2.30–2.12 (m, 2H), 1.95–1.87 (m, 1H), 1.47–1.37 (m, 1H). LCMS (FA): *m/z* = 473.5 (M+H). HRMS *m/z* [M+H]<sup>+</sup> calcd for C<sub>21</sub>H<sub>25</sub>N<sub>6</sub>O<sub>5</sub>S 473.1607, obsd 473.1607.

### Synthesis of 25

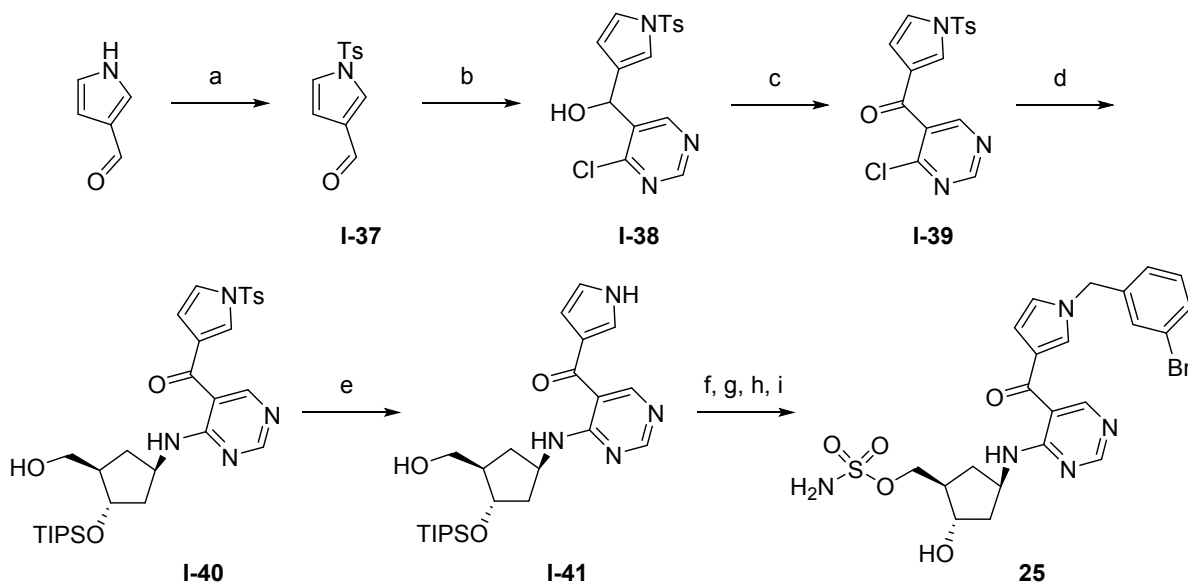

Reagents: (a) TsCl, NaOH, DCM, rt, 19 h, 88%; (b) 4-chloro-5-iodopyrimidine, *n*-BuLi, THF, -78 °C, 3 h, 69%; (c) MnO<sub>2</sub>, DCM, rt, 19 h, 97%; (d) **I-8**, K<sub>2</sub>CO<sub>3</sub>, DMF, rt, 24 h, 81%; (e) K<sub>2</sub>CO<sub>3</sub>, MeOH, rt, 3 h, 64%; (f), 3-bromobenzyl bromide, Cs<sub>2</sub>CO<sub>3</sub>, DMF, rt, 2 h; (g) chlorosulfonamide, DMF, rt, 1 h; (h) TFA, H<sub>2</sub>O, rt, 2 h; (i) MP PL-CO<sub>3</sub> resin, MeOH, rt, 0.5 h, 53% for 4 steps.

**Step 1: 1-[(4-Methylphenyl)sulfonyl]-1H-pyrrole-3-carbaldehyde (I-37).** 1H-Pyrrole-3-carbaldehyde (4.5 g, 47 mmol) was dissolved in DCM (400 mL) and the solution was cooled to 0 °C in an ice bath. NaOH (2.3 g, 57 mmol) was added and the mixture stirred for 10 min at 0 °C. The reaction mixture was kept cool and *p*-toluenesulfonyl chloride (18.0 g, 95 mmol) was added in 2 portions (10 min apart). The reaction mixture was allowed to stir at 0 °C and then slowly warm to rt and stir for 19 h. The reaction was then diluted with DCM (100 mL) and the mixture washed with water twice. The organic layer was dried over MgSO<sub>4</sub>, filtered, and concentrated. The crude product was purified on silica gel to yield **I-37** (10.4 g, 88%). <sup>1</sup>H NMR (CDCl<sub>3</sub>) δ 9.82 (s, 1H), 7.84–7.80 (m, 2H), 7.77 (t, 1H, *J* = 1.8 Hz), 7.36 (d, 2H, *J* = 8.0 Hz), 7.19–7.17 (m, 1H), 6.71 (dd, 1H, *J* = 3.3, 1.6 Hz), 2.44 (s, 3H). LCMS (FA): *m/z* = 250.1 (M+H).

**Step 2: (4-Chloropyrimidin-5-yl){1-[(4-methylphenyl)sulfonyl]-1H-pyrrol-3-yl}methanol (I-38).** Into a flame dried round bottom flask with stir bar was added 4-chloro-5-iodopyrimidine (2.3 g, 9.5 mmol) dissolved in THF (20 mL). The flask was purged with argon and cooled to -78 °C. To this solution was added dropwise *n*-BuLi (2.5 M in hexane; 7.9 mL, 19.8 mmol) at -78 °C and the mixture was stirred for 30 min. To this mixture was added 1-[(4-methylphenyl)sulfonyl]-1H-pyrrole-3-carbaldehyde (2.15 g, 8.6 mmol) dissolved in THF (10 mL) dropwise. The reaction was stirred at -78 °C for 3 h. The reaction was quenched with a saturated solution of NH<sub>4</sub>Cl and then extracted with EtOAc three times. The combined organic layers were then washed with water and brine, dried over Na<sub>2</sub>SO<sub>4</sub>, filtered and concentrated. The crude product was purified on silica gel to give **I-38** (2.2 g, 69%). <sup>1</sup>H NMR (CDCl<sub>3</sub>) δ 8.93 (d, 2H, *J* = 1.8 Hz), 7.76–7.72 (m, 2H), 7.33–7.29 (m, 2H), 7.16–7.12 (m, 2H), 6.24 (dd, 1H, *J* = 3.0, 1.8 Hz), 6.02 (s, 1H), 2.43 (s, 3H), 1.90–1.60 (m, 1H). LCMS (FA): *m/z* = 364.0 (M+H).

**Step 3: (4-Chloropyrimidin-5-yl){1-[(4-methylphenyl)sulfonyl]-1*H*-pyrrol-3-yl}methanone (I-39).** To a solution of (4-chloropyrimidin-5-yl){1-[(4-methylphenyl)sulfonyl]-1*H*-pyrrol-3-yl}methanol (2.2 g, 6.0 mmol) in DCM (60 mL) was added MnO<sub>2</sub> (5.2 g, 60 mmol). The suspension was stirred for 19 h at rt. The reaction was then filtered through a celite pad and the residual solid was washed with DCM several times. The filtrate was then concentrated in vacuo and the residue was purified on silica gel to afford **I-39** (2.1 g, 97%). <sup>1</sup>H NMR (CDCl<sub>3</sub>) δ 9.13 (s, 1H), 8.71 (s, 1H), 7.81 (d, 2H, *J* = 8.3 Hz), 7.53 (s, 1H), 7.37 (d, 2H, *J* = 8.2 Hz), 7.24–7.21 (m, 1H), 6.76–6.74 (m, 1H), 2.46 (s, 3H). LCMS (FA): *m/z* = 362.0 (M+H).

**Step 4: [4-((1*R*,3*R*,4*S*)-3-(Hydroxymethyl)-4-[(triisopropylsilyl)oxy]cyclopentyl)amino]pyrimidin-5-yl){1-[(4-methylphenyl)sulfonyl]-1*H*-pyrrol-3-yl}methanone (I-40).** Into a round bottom flask was added {(1*R*,2*S*,4*R*)-4-amino-2-[(triisopropylsilyl)oxy]cyclopentyl}methanol-TFA (**I-8**, 0.75 g, 1.9 mmol) dissolved in DMF (3 mL), and added to a solution of (4-chloropyrimidin-5-yl){1-[(4-methylphenyl)sulfonyl]-1*H*-pyrrol-3-yl}methanone (0.59 g, 1.6 mmol) in DMF (8 mL). K<sub>2</sub>CO<sub>3</sub> (0.67 g, 4.9 mmol) was added to the reaction vessel and the resulting mixture was stirred at rt for 24 h. The reaction was then quenched by addition of water and the mixture extracted with EtOAc three times. The combined organic layers were then washed with water and brine, dried over Na<sub>2</sub>SO<sub>4</sub>, filtered and concentrated. The crude product was purified on silica gel to provide **I-40** (0.80 g, 81%). <sup>1</sup>H NMR (CDCl<sub>3</sub>) δ 8.96–8.88 (m, 1H), 8.71 (s, 1H), 8.65 (s, 1H), 7.82 (d, 2H, *J* = 8.4 Hz), 7.62 (t, 1H, *J* = 1.9 Hz), 7.36 (d, 2H, *J* = 8.2 Hz), 7.23 (dd, 1H, *J* = 3.1, 2.2 Hz), 6.69 (dd, 1H, *J* = 3.3, 1.6 Hz), 4.86–4.76 (m, 1H), 4.35–4.30 (m, 1H), 3.73–3.66 (m, 2H), 2.50 (ddd, 1H, *J* = 13.3, 8.3, 7.9 Hz), 2.44 (s, 3H), 2.24–2.15 (m, 2H), 1.89–1.80 (m, 1H), 1.77–1.72 (m, 1H), 1.32 (dt, 1H, *J* = 13.3, 7.8 Hz), 1.09–1.05 (m, 21H). LCMS (FA): *m/z* = 613.2 (M+H).

**Step 5: [4-((1*R*,3*R*,4*S*)-3-(Hydroxymethyl)-4-[(triisopropylsilyl)oxy]cyclopentyl)amino]pyrimidin-5-yl)(1*H*-pyrrol-3-yl)methanone (I-41).** Into a round bottom flask with stir bar was added [4-((1*R*,3*R*,4*S*)-3-(hydroxymethyl)-4-[(triisopropylsilyl)oxy]cyclopentyl)amino]pyrimidin-5-yl){1-[(4-methylphenyl)sulfonyl]-1*H*-pyrrol-3-yl}methanone (0.80 g, 1.3 mmol), MeOH (20 mL) and K<sub>2</sub>CO<sub>3</sub> (0.54 g, 3.9 mmol) and the mixture was stirred at rt for 3 h. The reaction was then quenched by addition of water and the mixture extracted with EtOAc three times. The combined organic layers were then washed with water and brine, dried over Na<sub>2</sub>SO<sub>4</sub>, filtered and concentrated. The crude product was purified on silica gel to provide **I-41** (0.38 g, 64%). <sup>1</sup>H NMR (CDCl<sub>3</sub>) δ 9.06–8.90 (m, 2H), 8.79 (s, 1H), 8.64 (s, 1H), 7.36–7.33 (m, 1H), 6.90–6.87 (m, 1H), 6.72–6.69 (m, 1H), 4.86–4.76 (m, 1H), 4.36–4.31 (m, 1H), 3.71 (d, 2H, *J* = 5.8 Hz), 2.51 (dt, 1H, *J* = 13.0, 8.0 Hz), 2.25–2.16 (m, 2H), 2.10–1.90 (br s, 1H), 1.88 (ddd, 1H, *J* = 13.6, 7.2, 6.4 Hz), 1.34 (dt, 1H, *J* = 13.2, 7.9 Hz), 1.10–1.06 (m, 21H). LCMS (FA): *m/z* = 459.2 (M+H).

**Step 6: {(1*R*,2*S*,4*R*)-4-[5-{1-(3-Bromobenzyl)-1*H*-pyrrol-3-yl}carbonyl]pyrimidin-4-yl}amino]-2-hydroxycyclopentyl}methyl sulfamate (25).**

To a 3-dram vial with 3-bromobenzyl bromide (0.02 g, 0.08 mmol) was added [4-((1*R*,3*R*,4*S*)-3-(hydroxymethyl)-4-[(triisopropylsilyl)oxy]cyclopentyl)amino]pyrimidin-5-yl)(1*H*-pyrrol-3-yl)methanone (0.03 g, 0.06 mmol) in DMF (1.0 mL) followed by Cs<sub>2</sub>CO<sub>3</sub> (0.08 g, 0.25 mmol). The mixture was shaken at rt for 2 h. The solid Cs<sub>2</sub>CO<sub>3</sub> was filtered and rinsed with DMF (1 mL). To the combined clear DMF solution was added chlorosulfonamide (0.03g, 0.25 mmol).

The solution was shaken at rt for 1 h, then saturated NaHCO<sub>3</sub> (2 mL) and EtOAc (5 mL) were added. After separation, the aqueous layer was extracted with EtOAc (5 mL). The combined organic phases were then concentrated. To the resulting solid in a 20 mL vial was added TFA (2.0 mL) and water (0.2 mL) and then shaken at rt for 2 h. The solvent was then evaporated and to the resulting residue was added MeOH (3.0 mL) and MP PL-CO<sub>3</sub> resin. After shaking at rt for 30 min, the resin was filtered off and rinsed with MeOH (10 mL). The filtrate was concentrated and the residue purified by prep-HPLC to provide **25** (18 mg, 53%). <sup>1</sup>H NMR (DMSO-*d*<sub>6</sub>) δ 8.68 (s, 1H), 8.53 (s, 1H), 7.49–7.42 (m, 3H), 7.30–7.21 (m, 2H), 6.90 (m, 1H), 6.64–6.61 (m, 1H), 5.20 (s, 2H), 4.80–4.72 (m, 1H), 4.23–4.13 (m, 3H), 2.54–2.47 (m, 1H), 2.30–2.11 (m, 2H), 1.93–1.86 (m, 1H), 1.45–1.37 (m, 1H); LCMS (FA): *m/z* = 550.0 (M+H). HRMS *m/z* [M+H]<sup>+</sup> calcd for C<sub>22</sub>H<sub>25</sub>BrN<sub>5</sub>O<sub>5</sub>S 550.0760, obsd 550.0764.

## Synthesis of 26

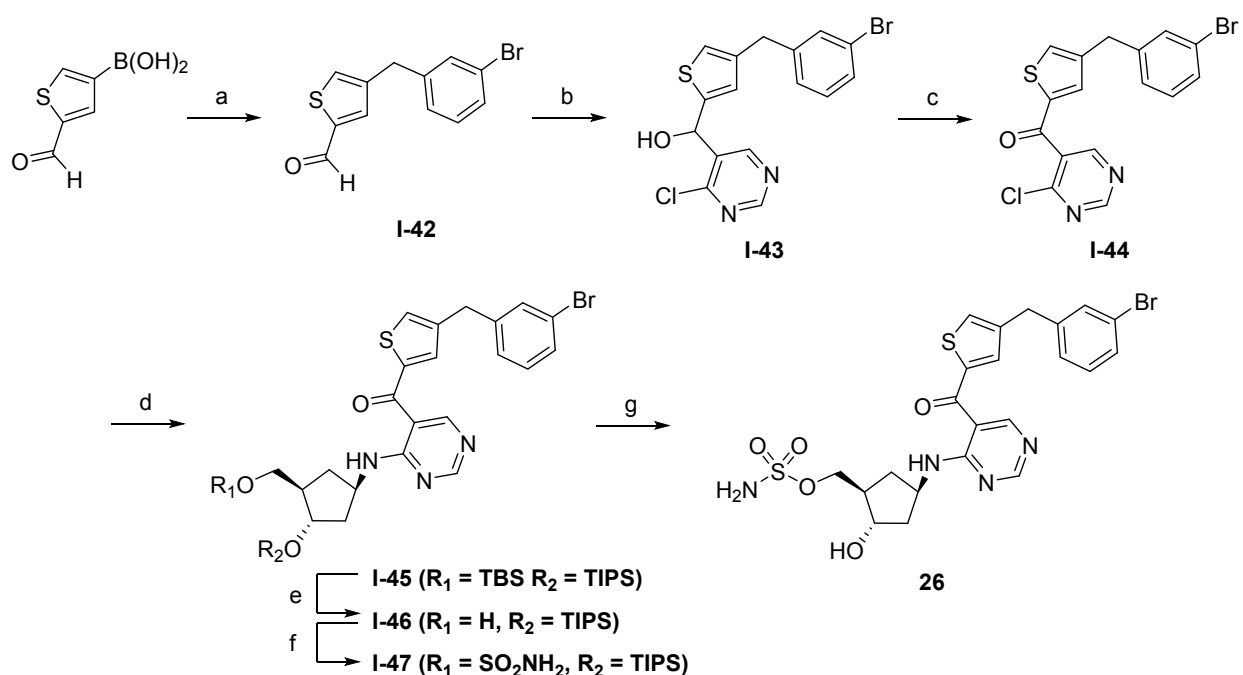

Reagents: (a) 3-bromobenzyl bromide, Pd(PPh<sub>3</sub>)<sub>4</sub>, K<sub>2</sub>CO<sub>3</sub>, 1,4-dioxane, 80 °C, 24 h, 70%; (b) 4-chloro-5-iodopyrimidine, *n*-BuLi, THF, -78 °C, 0.5 h, 86%; (c) Dess-Martin periodinane, DCM, rt, 15 min, 96%; (d) **I-31**, K<sub>2</sub>CO<sub>3</sub>, DMF, rt, 13 h, 94%; (e) 1% HCl in EtOH, EtOH, rt, 8 h, 89%; (f) chlorosulfonamide, DMF, rt, 15 min, 78%; (g) 4N HCl, THF, rt, 4 h, 87%.

**Step 1: 4-(3-Bromobenzyl)thiophene-2-carbaldehyde (I-42).** To a degassed solution of 2-formyl-4-thiopheneboronic acid (500 mg, 3.21 mmol), 3-bromobenzyl bromide (0.88 g, 3.53 mmol) and K<sub>2</sub>CO<sub>3</sub> (1.33 g, 9.6 mmol) in 1,4-dioxane (15 mL) was added Pd(PPh<sub>3</sub>)<sub>4</sub> (0.185 g, 0.16 mmol). The reaction mixture was stirred at 80 °C for 1 d then quenched with water and extracted with EtOAc. The combined organic layers were dried over Mg<sub>2</sub>SO<sub>4</sub>, filtered and concentrated in vacuo. The crude material was purified on silica gel to provide **I-42** (631 mg, 70%). <sup>1</sup>H NMR (CDCl<sub>3</sub>) δ 9.86 (d, 1H, *J* = 1.2 Hz), 7.55 (d, 1H, *J* = 1.2 Hz), 7.42–7.32 (m, 3H), 7.20 (t, 1H, *J* = 7.7 Hz), 7.13 (d, 1H, *J* = 7.7 Hz), 3.97 (s, 2H). LCMS (FA): *m/z* = 282.9 (M+H).

**Step 2: rac-[4-(3-Bromobenzyl)-2-thienyl](4-chloropyrimidin-5-yl)methanol (I-43).** A solution of 4-chloro-5-iodopyrimidine (216 mg, 0.90 mmol) in THF (5.0 mL) was cooled to -78 °C with dry-ice bath. To the solution was added dropwise 2.50 M of *n*-BuLi in hexane (0.36 mL, 0.90 mmol) at -78 °C, and the mixture was stirred for 20 min. To the mixture was added a solution of 4-(3-bromobenzyl)thiophene-2-carbaldehyde (210 mg, 0.75 mmol) in THF (2.0 mL) at -78 °C, and the resulting mixture was stirred for 30 min. The reaction was quenched by addition of saturated NH<sub>4</sub>Cl (50mL) and extracted with EtOAc (50mL) three times. The combined organic layers were dried over Na<sub>2</sub>SO<sub>4</sub>, filtered, and concentrated in vacuo. The crude product was purified on silica gel to provide **I-43** as a colorless oil (260 mg, 86%). <sup>1</sup>H NMR (CDCl<sub>3</sub>) δ 9.02 (s, 1H), 8.94 (s, 1H), 7.35 (d, 1H, *J* = 7.9 Hz), 7.32 (s, 1H), 7.17 (t, 1H, *J* = 7.7 Hz), 7.09 (d, 1H, *J* = 7.7 Hz), 6.91 (s, 1H), 6.82 (s, 1H), 6.27 (s, 1H), 3.86 (s, 2H), 2.86–2.60 (br s, 1H). LCMS (FA): *m/z* = 396.9 (M+H).

**Step 3: [4-(3-Bromobenzyl)-2-thienyl](4-chloropyrimidin-5-yl)methanone (I-44).** To a solution of rac-[4-(3-bromobenzyl)-2-thienyl](4-chloropyrimidin-5-yl)methanol (255 mg, 0.64 mmol) in DCM (10.0 mL) was added Dess-Martin periodinane (410 mg, 0.97 mmol) at rt, and the mixture was stirred for 15 min. The reaction was quenched by addition of saturated NaHCO<sub>3</sub> (50mL) and extracted with DCM (50mL) three times. The combined organic layers were washed with brine, dried over Na<sub>2</sub>SO<sub>4</sub>, filtered, and concentrated in vacuo. The residue was purified on silica gel to afford **I-44** as a colorless oil (247 mg, 96%). <sup>1</sup>H NMR (CDCl<sub>3</sub>) δ 9.12 (s, 1H), 8.75 (s, 1H), 7.49–7.45 (m, 1H), 7.38 (d, 1H, *J* = 8.0 Hz), 7.31 (s, 1H), 7.28 (d, 1H, *J* = 1.4 Hz), 7.18 (t, 1H, *J* = 7.8 Hz), 7.09 (d, 1H, *J* = 7.8 Hz), 3.94 (s, 2H). LCMS (FA): *m/z* = 394.9 (M+H).

**Step 4: [4-(3-Bromobenzyl)-2-thienyl][4-((1*R*,3*R*,4*S*)-3-({*tert*-butyl(dimethyl)silyl}oxy)methyl)-4-[(triisopropylsilyl)oxy]cyclopentyl}amino)pyrimidin-5-yl]methanone (I-45).** To a solution of [4-(3-bromobenzyl)-2-thienyl](4-chloropyrimidin-5-yl)methanone (245 mg, 0.62 mmol) in DMF (10 mL) was added (1*R*,3*R*,4*S*)-3-({*tert*-butyl(dimethyl)silyl}oxy)methyl)-4-[(triisopropylsilyl)oxy]cyclopentanamine (**I-31**, 375 mg, 0.93 mmol) followed by K<sub>2</sub>CO<sub>3</sub> (215 mg, 1.56 mmol), and the reaction was stirred for 13 h at rt. The reaction was concentrated in vacuo. To the residue was added water (50mL) and the mixture was extracted with EtOAc (50mL) three times. The combined organic layers were dried over Na<sub>2</sub>SO<sub>4</sub>, filtered, and concentrated in vacuo. The residue was purified on silica gel to give **I-45** as a light yellow oil (445 mg, 94%). <sup>1</sup>H NMR (CDCl<sub>3</sub>) δ 8.78 (s, 1H), 8.69–8.56 (m, 2H), 7.42–7.30 (m, 4H), 7.18 (t, 1H, *J* = 7.7 Hz), 7.12 (d, 1H, *J* = 7.7 Hz), 4.86–4.72 (m, 1H), 4.33–4.25 (m, 1H), 3.96 (s, 2H), 3.61 (dd, 1H, *J* = 10.1, 5.4 Hz), 3.55 (dd, 1H, *J* = 10.1, 5.8 Hz), 2.49–2.36 (m, 1H), 2.24–2.08 (m, 2H), 1.77–1.66 (m, 1H), 1.34–1.17 (m, 1H), 1.06 (s, 21H), 0.88 (s, 9H), 0.03 (s, 6H).

**Step 5: [4-(3-Bromobenzyl)-2-thienyl][4-((1*R*,3*R*,4*S*)-3-(hydroxymethyl)-4-[(triisopropylsilyl)oxy]cyclopentyl}amino)pyrimidin-5-yl]methanone (I-46).** To a solution of [4-(3-bromobenzyl)-2-thienyl][4-((1*R*,3*R*,4*S*)-3-({*tert*-butyl(dimethyl)silyl}oxy)methyl)-4-[(triisopropylsilyl)oxy]cyclopentyl}amino)pyrimidin-5-yl]methanone (150 mg, 0.20 mmol) in EtOH (8.0 mL) was added 1% HCl in EtOH solution (2.0 mL, 0.24 mmol), and the mixture was stirred for 8 h at rt. The reaction was quenched by addition of saturated NaHCO<sub>3</sub> (50mL) and extracted with EtOAc (60mL) three times. The combined organic layers were washed with brine, dried over Na<sub>2</sub>SO<sub>4</sub>, filtered, and concentrated in vacuo. The residue was purified on silica gel to

provide **I-46** as a light yellow oil (113 mg, 89%). <sup>1</sup>H NMR (CDCl<sub>3</sub>) δ 8.79 (s, 1H), 8.71 (d, 1H, *J* = 7.3 Hz), 8.66 (s, 1H), 7.40–7.32 (m, 4H), 7.19 (dd, 1H, *J* = 7.8, 7.6 Hz), 7.15–7.11 (m, 1H), 4.86–4.76 (m, 1H), 4.35–4.30 (m, 1H), 3.97 (s, 2H), 3.74–3.66 (m, 2H), 2.54–2.45 (m, 1H), 2.24–2.15 (m, 2H), 1.89–1.81 (m, 1H), 1.75 (t, 1H, *J* = 4.8 Hz), 1.32 (dt, 1H, *J* = 13.2, 7.8 Hz), 1.10–1.04 (m, 21H). LCMS (FA): *m/z* = 646.1 (M+H).

**Step 6: {(1*R*,2*S*,4*R*)-4-[(5-{[4-(3-Bromobenzyl)-2-thienyl]carbonyl}pyrimidin-4-yl)amino]-2-[(triisopropylsilyl)oxy]cyclopentyl}methyl sulfamate (I-47).** To a solution of [4-(3-bromobenzyl)-2-thienyl][4-({(1*R*,3*R*,4*S*)-3-(hydroxymethyl)-4-[(triisopropylsilyl)oxy]cyclopentyl}amino)pyrimidin-5-yl]methanone (110 mg, 0.17 mmol) in DMF (2.0 mL) was added chlorosulfonamide (39.4 mg, 0.34 mmol) at rt, and the mixture was stirred for 15 min. The reaction was cooled to 0 °C and quenched by addition of saturated NaHCO<sub>3</sub> (50 mL). The mixture was extracted with EtOAc (50 mL) three times. The combined organic layers were dried over Na<sub>2</sub>SO<sub>4</sub>, filtered, and concentrated in vacuo. The residue was purified on silica gel to give **I-47** as a light yellow sticky oil (101 mg, 78%). <sup>1</sup>H NMR (CDCl<sub>3</sub>) δ 8.79 (s, 1H), 8.72–8.59 (m, 2H), 7.45–7.30 (m, 4H), 7.19 (t, 1H, *J* = 7.7 Hz), 7.12 (d, 1H, *J* = 7.5 Hz), 5.15 (s, 2H), 4.88–4.75 (m, 1H), 4.34 (q, 1H, *J* = 5.2 Hz), 4.27 (d, 2H, *J* = 4.7 Hz), 3.96 (s, 2H), 2.67–2.53 (m, 1H), 2.43–2.30 (m, 1H), 2.22–2.11 (m, 1H), 1.90 (dt, 1H, *J* = 13.1, 6.4 Hz), 1.46 (dt, 1H, *J* = 13.2, 6.6 Hz), 1.05 (s, 21H). LCMS (FA): *m/z* = 725.1 (M+H).

**Step 7: {(1*R*,2*S*,4*R*)-4-[(5-{[4-(3-Bromobenzyl)-2-thienyl]carbonyl}pyrimidin-4-yl)amino]-2-hydroxycyclopentyl}methyl sulfamate (26).**

To a solution of {(1*R*,2*S*,4*R*)-4-[(5-{[4-(3-bromobenzyl)-2-thienyl]carbonyl}pyrimidin-4-yl)amino]-2-[(triisopropylsilyl)oxy]cyclopentyl}methyl sulfamate (95.0 mg, 0.13 mmol) in THF (2.0 mL) was added 4.0 M of HCl (2.00 mL, 8.00 mmol) at rt, and the mixture was stirred for 4 h. The reaction was quenched by addition of saturated NaHCO<sub>3</sub> (60 mL) and extracted with EtOAc (60 mL) three times. The combined organic layers were washed with brine, dried over Na<sub>2</sub>SO<sub>4</sub>, filtered, and concentrated in vacuo. The residue was purified on silica gel to provide **26** as an off-white solid (66 mg, 87%). <sup>1</sup>H NMR (DMSO-*d*<sub>6</sub>) δ 8.68 (s, 1H), 8.64 (s, 1H), 8.26 (d, 1H, *J* = 7.4 Hz), 7.82 (s, 1H), 7.70 (s, 1H), 7.51 (s, 1H), 7.48–7.35 (m, 3H), 7.35–7.20 (m, 2H), 4.88 (d, 1H, *J* = 4.5 Hz), 4.77–4.62 (m, 1H), 4.09 (dd, 1H, *J* = 9.6, 6.1 Hz), 4.04–3.87 (m, 4H), 2.31 (dt, 1H, *J* = 13.6, 7.5 Hz), 2.17–2.05 (m, 1H), 2.01–1.90 (m, 1H), 1.82–1.70 (m, 1H), 1.33–1.20 (m, 1H). LCMS (FA): *m/z* = 569.1 (M+H). HRMS *m/z* [M+H]<sup>+</sup> calcd for C<sub>22</sub>H<sub>24</sub>BrN<sub>4</sub>O<sub>5</sub>S<sub>2</sub> 567.0371, obsd 567.0370.

## Synthesis of Intermediate I-50

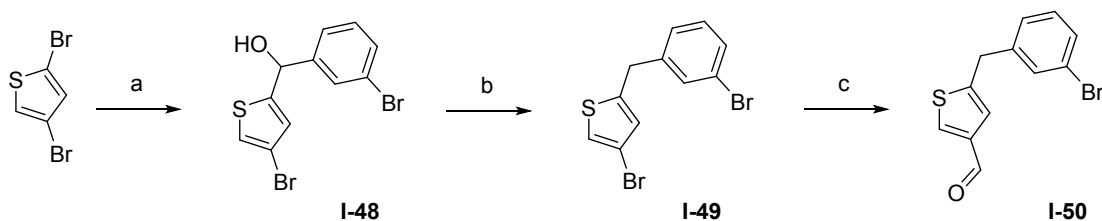

Reagents: (a) 3-bromobenzaldehyde, *n*-BuLi, THF, -45 °C, 15 min, 54%; (b) Et<sub>3</sub>SiH, BF<sub>3</sub>·Me<sub>2</sub>O, DCM, rt, 2 h, 45%; (c) *n*-BuLi, DMF, THF, -65 °C, 30 min, 38%.



**Step 1: rac-(3-Bromophenyl)(4-bromo-2-thienyl)methanol (I-48).** To a solution of 2.50 M of *n*-BuLi in hexane (3.71 mL, 9.29 mmol) in THF (20 mL) at -78 °C was added 2,4-dibromothiophene (1.0 mL, 8.85 mmol) and the mixture was stirred for 5 min. To the mixture was added 3-bromobenzaldehyde (1.08 mL, 9.29 mmol) quickly and the resulting mixture was stirred for 15 min at -45 °C. The reaction was quenched by addition of saturated NH<sub>4</sub>Cl (50mL) and extracted with EtOAc (50mL) three times. The combined organic layers were dried over Na<sub>2</sub>SO<sub>4</sub>, filtered, and concentrated in vacuo. The crude product was purified on silica gel to provide **I-48** (1.65 g, 54%). <sup>1</sup>H NMR (CDCl<sub>3</sub>) δ 7.60 (s, 1H), 7.49–7.45 (m, 1H), 7.37–7.34 (m, 1H), 7.28–7.24 (m, 1H), 7.20 (d, 1H, *J* = 1.4 Hz), 6.81 (s, 1H), 5.97 (d, 1H, *J* = 3.8 Hz), 2.45 (d, 1H, *J* = 4.0 Hz). LCMS (FA): *m/z* = 331.0 (M+H).

**Step 2: 4-Bromo-2-(3-bromobenzyl)thiophene (I-49).** A solution of rac-(3-bromophenyl)(4-bromo-2-thienyl)methanol (1.65 g, 4.74 mmol) and triethylsilane (1.13 mL, 7.08 mmol) in DCM (9.0 mL) was cooled to 0 °C. BF<sub>3</sub>·Me<sub>2</sub>O (0.71 mL, 7.14 mmol) was added dropwise slowly and the reaction was warmed to rt and stirred for 2 h. The reaction was quenched by addition of saturated NaHCO<sub>3</sub> (50mL) and extracted with DCM (50mL) three times. The combined organic layers were dried over Na<sub>2</sub>SO<sub>4</sub>, filtered, and concentrated in vacuo. The crude product was purified on silica gel to provide **I-49** (0.71 g, 45%). <sup>1</sup>H NMR (CDCl<sub>3</sub>) δ 7.41–7.39 (m, 2H), 7.23–7.15 (m, 2H), 7.08 (s, 1H), 6.73 (s, 1H), 4.08 (s, 2H).

**Step 3: 5-(3-Bromobenzyl)thiophene-3-carbaldehyde (I-50).** A solution of 4-bromo-2-(3-bromobenzyl)thiophene (0.71 g, 2.13 mmol) in THF (10.0 mL) was cooled to -78 °C with dry-ice bath. To the solution was added dropwise 2.50 M of *n*-BuLi in hexane (0.90 mL, 2.24 mmol) at -78 °C, and the mixture was stirred for 5 min. To the mixture was added DMF (0.20 mL, 2.56 mmol) and the resulting mixture was stirred at -65 °C for 30 min. The reaction was quenched by addition of saturated NH<sub>4</sub>Cl (50mL) and extracted with EtOAc (50mL) three times. The combined organic layers were dried over Na<sub>2</sub>SO<sub>4</sub>, filtered, and concentrated in vacuo. The crude product was purified on silica gel to provide **I-50** as an orange oil (0.23 g, 38%). <sup>1</sup>H NMR (CDCl<sub>3</sub>) δ 9.82 (s, 1H), 7.97 (s, 1H), 7.42–7.39 (m, 2H), 7.25–7.23 (m, 1H), 7.21–7.16 (m, 2H), 4.12 (s, 2H). LCMS (FA): *m/z* = 283.0 (M+H).

## Synthesis of 27

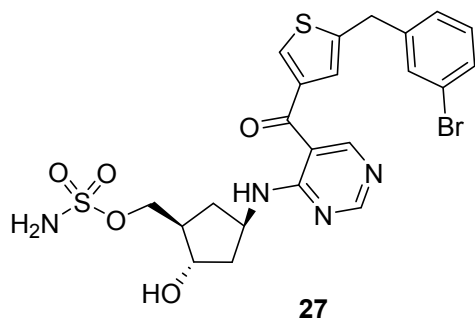

### [(1R,2S,4R)-4-({5-[5-(3-Bromobenzyl)-2-furoyl]pyrimidin-4-yl}amino)-2-hydroxycyclopentyl]methyl sulfamate (27).

Prepared by the method described for the preparation of **26** using 4-chloro-5-iodopyrimidine and intermediate **I-50** in Step 2. The following alternative conditions were employed in the reaction

scheme: Step 7: desilylating agent/solvent used was  $\text{H}_3\text{PO}_4/\text{CH}_3\text{CN}$ .  $^1\text{H}$  NMR ( $\text{DMSO}-d_6$ )  $\delta$  8.66 (s, 1H), 8.57 (s, 1H), 7.89 (s, 1H), 7.47 (s, 1H), 7.42–7.39 (m, 1H), 7.30–7.22 (m, 3H), 4.84–4.77 (m, 1H), 4.24–4.14 (m, 3H), 4.20 (s, 2H), 2.55–2.2.48 (m, 1H), 2.31–2.24 (m, 1H), 2.20–2.13 (m, 1H), 1.95–1.88 (m, 1H), 1.51–1.39 (m, 1H). LCMS (FA):  $m/z$  = 569.1 (M+H). HRMS  $m/z$  [M+H] $^+$  calcd for  $\text{C}_{22}\text{H}_{24}\text{BrN}_4\text{O}_5\text{S}_2$  567.0371, obsd 567.0367.

### Synthesis of Intermediate I-53

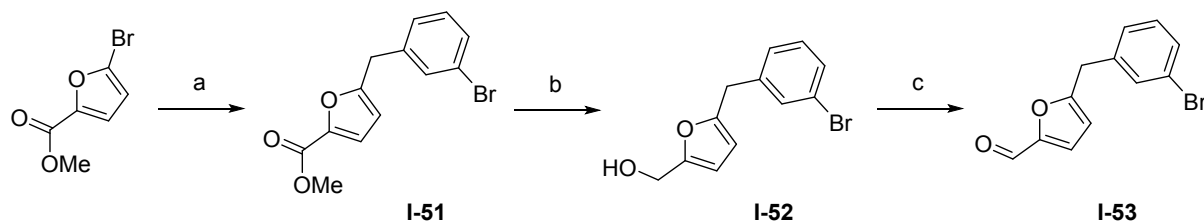

Reagents: (a) 3-bromobenzylzinc bromide,  $\text{Pd}(\text{PPh}_3)_4$ , THF, 70 °C, 24 h, 54%; (b) LAH, THF, 0 °C, 2 h; (c) Dess-Martin periodinane, DCM, rt, 1 h, 28% for 2 steps.

**Step 1: Methyl 5-(3-bromobenzyl)-2-furoate (I-51).** A microwave reaction tube was charged with methyl 5-bromofuran-2-carboxylate (775 mg, 3.78 mmol) and  $\text{Pd}(\text{PPh}_3)_4$  (218 mg, 0.19 mmol). The flask was sealed and purged with argon for 5 min, and then THF (10.0 mL) was added to the reaction vessel. 0.5 M of 3-bromobenzylzinc bromide in THF (8.32 mL, 4.16 mmol) was then added to the solution and the reaction was heated at 70 °C for 1 d. The reaction was quenched with saturated  $\text{NH}_4\text{Cl}$  and extracted with EtOAc three times. The combined organic layers were then washed with water, brine, dried using  $\text{Na}_2\text{SO}_4$ , filtered and concentrated. The residue was purified on silica gel to give **I-51** (0.60 g, 54%).  $^1\text{H}$  NMR ( $\text{CDCl}_3$ )  $\delta$  7.40–7.36 (m, 2H), 7.20–7.16 (m, 2H), 7.10 (d, 1H,  $J$  = 3.4 Hz), 6.11 (d, 1H,  $J$  = 3.4 Hz), 4.01 (s, 2H), 3.88 (s, 3H).

**Step 2: [5-(3-Bromobenzyl)-2-furyl]methanol (I-52).** To a round bottom flask was added methyl 5-(3-bromobenzyl)-2-furoate (733 mg, 2.48 mmol) in THF (8.0 mL) and cooled at 0 °C. 1.0 M of lithium aluminum hydride in  $\text{Et}_2\text{O}$  (3.23 mL, 3.23 mmol) was then added slowly and the resulting mixture was stirred at 0 °C for 2 h. Added 1 mL of water slowly to quench reaction mixture, then added solid  $\text{Na}_2\text{SO}_4$ . The mixture was stirred at rt for 1 hour and then filtered through a pad of celite. The filtrate was concentrated to dryness and no further purification was done to give crude **I-52** (610 mg).  $^1\text{H}$  NMR ( $\text{CDCl}_3$ )  $\delta$  7.39–7.37 (m, 1H), 7.32–7.28 (m, 1H), 7.25–7.21 (m, 2H), 7.18–7.15 (m, 1H), 6.22–6.17 (m, 1H), 5.98–5.91 (m, 1H), 4.56 (s, 2H), 3.94 (d, 2H,  $J$  = 13.7 Hz).

**Step 3: 5-(3-Bromobenzyl)-2-furaldehyde (I-53).** Into a round bottom flask was added crude [5-(3-bromobenzyl)-2-furyl]methanol (609 mg, 2.28 mmol) dissolved in DCM (10 mL). Dess-Martin periodinane (1.16 g, 2.74 mmol) was added and the resulting reaction mixture was stirred at rt for 1 h. The reaction was then quenched by the addition of saturated  $\text{Na}_2\text{S}_2\text{O}_3$  and extracted with DCM three times. The combined organic layers were then washed with water, brine, dried using  $\text{Na}_2\text{SO}_4$ , filtered and concentrated. The residue was purified on silica gel to provide **I-53** (167 mg, 28% for 2 steps).  $^1\text{H}$  NMR ( $\text{CDCl}_3$ )  $\delta$  9.56 (s, 1H), 7.43–7.37 (m, 2H), 7.23–7.14 (m, 3H), 6.22 (d, 1H,  $J$  = 3.5 Hz), 4.03 (s, 2H).

## Synthesis of 28

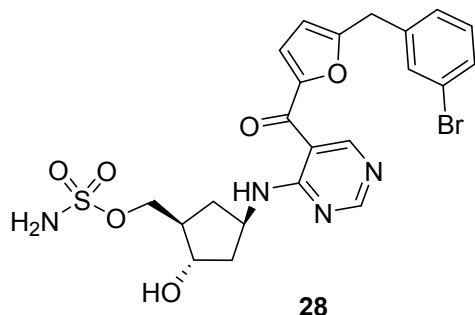

### [(1R,2S,4R)-4-({5-[5-(3-Bromobenzyl)-2-furoyl]pyrimidin-4-yl}amino)-2-hydroxycyclopentyl]methyl sulfamate (28).

Prepared by the method described for the preparation of **26** using 4-chloro-5-iodopyrimidine and intermediate **I-53** in Step 2. <sup>1</sup>H NMR (DMSO-*d*<sub>6</sub>) δ 8.80 (s, 1H), 8.62 (s, 1H), 8.43 (d, 1H, *J* = 7.4 Hz), 7.54 (s, 1H), 7.51–7.45 (m, 1H), 7.44 (s, 2H), 7.37 (d, 1H, *J* = 3.6 Hz), 7.34–7.29 (m, 2H), 6.52 (d, 1H, *J* = 3.5 Hz), 4.90 (d, 1H, *J* = 4.5 Hz), 4.74–4.62 (m, 1H), 4.17 (s, 2H), 4.08 (dd, 1H, *J* = 9.7, 6.0 Hz), 3.99–3.90 (m, 2H), 2.37–2.26 (m, 1H), 2.16–2.07 (m, 1H), 2.00–1.91 (m, 1H), 1.80–1.69 (m, 1H), 1.25 (dt, 1H, *J* = 12.5, 9.1 Hz). LCMS (FA): *m/z* = 552.9 (M+H). HRMS *m/z* [M+H]<sup>+</sup> calcd for C<sub>22</sub>H<sub>24</sub>BrN<sub>4</sub>O<sub>6</sub>S 551.0600, obsd 551.0589.

## Procedures for the syntheses of compounds in Table 5

### Synthesis of 29

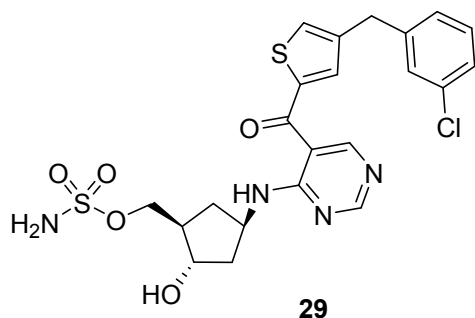

### {(1R,2S,4R)-4-[(5-{[4-(3-Chlorobenzyl)-2-thienyl]carbonyl}pyrimidin-4-yl)amino]-2-hydroxycyclopentyl}methyl sulfamate (29).

Prepared by the method described for the preparation of **26** using 2-formyl-4-thiopheneboronicacid and 1-(bromomethyl)-3-chlorobenzene in Step 1. <sup>1</sup>H NMR (CDCl<sub>3</sub>) δ 8.82 (s, 1H), 8.67 (s, 1H), 8.62 (d, 1H, *J* = 7.5 Hz), 7.42 (d, 1H, *J* = 1.4 Hz), 7.39 (s, 1H), 7.26–7.23 (m, 1H), 7.18 (s, 1H), 7.09 (d, 1H, *J* = 7.1 Hz), 5.41 (br, 2H), 4.87–4.68 (m, 1H), 4.43–4.31 (m, 2H), 4.30–4.21 (m, 1H), 3.99 (s, 2H), 2.63–2.49 (m, 1H), 2.42–2.27 (m, 1H), 2.21–2.09 (m, 1H),

2.08–1.97 (m, 1H), 1.54–1.37 (m, 1H). LCMS (FA):  $m/z$  = 523.2 (M+H). HRMS  $m/z$  [M+H]<sup>+</sup> calcd for C<sub>22</sub>H<sub>24</sub>ClN<sub>4</sub>O<sub>5</sub>S<sub>2</sub> 523.0877, obsd 523.0878.

## Synthesis of Intermediate I-56

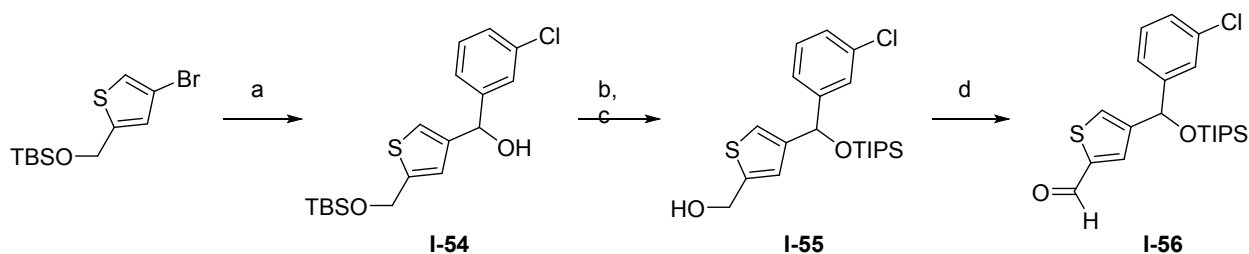

Reagents: (a) 3-chlorobenzaldehyde, *n*-BuLi, THF, -78 °C, 15 min, 60%; (b) TIPSCl, NaH, DCM, rt, 12 h; (c) 1% HCl in EtOH, rt, 15 min, 86% for 2 steps, (d) MnO<sub>2</sub>, DCM, rt, 12 h, 93%.

**Step 1: rac-[5-({*tert*-Butyl(dimethyl)silyl}oxy)methyl]-3-thienyl](3-chlorophenyl)methanol (I-54).** 2.50 M of *n*-BuLi in hexane (4.14 mL, 10.4 mmol) was dissolved into THF (100 mL) at -78 °C, then ((4-bromothiophen-2-yl)methoxy)(*tert*-butyl)dimethylsilane (2.45 g, 7.97 mmol) was added to this solution at -78 °C and the mixture was stirred for 2 min. 3-chlorobenzaldehyde (1.12 g, 7.99 mmol) was added to the solution at -78 °C and the reaction was stirred at -78 °C for 15 min. The solution was poured into 100 mL of 5 g acetic acid in water solution and the resulting mixture was extracted with DCM (70 mL) twice. The combined organic layers were concentrated in vacuo. The residue was purified on silica gel to provide **I-54** (1.76 g, 60%). <sup>1</sup>H NMR (CDCl<sub>3</sub>) δ 7.40 (s, 1H), 7.28–7.26 (m, 3H), 7.09–7.08 (m, 1H), 6.79–6.78 (m, 1H), 5.77 (s, 1H), 4.81 (s, 2H), 2.40 (br s, 1H), 0.93 (s, 9H), 0.10 (s, 6H).

**Step 2: rac-(4-{(3-Chlorophenyl)[(triisopropylsilyl)oxy]methyl}-2-thienyl)methanol (I-55).** rac-[5-({*tert*-Butyl(dimethyl)silyl}oxy)methyl]-3-thienyl](3-chlorophenyl)methanol (0.40 g, 1.08 mmol) was dissolved in THF (20 mL), then 60% NaH in mineral oil (78 mg, 3.25 mmol) was added to this solution. The solution was stirred at 50 °C for 30 min. TIPSCl (0.35 mL, 1.63 mmol) was added and the reaction mixture stirred at rt overnight. The solution was poured into 30 mL saturated NH<sub>4</sub>Cl solution. The solution was extracted with EtOAc (20 mL) twice. The combined organic layers were dried over Na<sub>2</sub>SO<sub>4</sub>, filtered, concentrated in vacuo to provide the disilylated intermediate. The residue was dissolved in 15 mL of 1% HCl in EtOH solution and the reaction mixture was stirred for 15 min. at rt. The reaction was quenched by addition of saturated NaHCO<sub>3</sub> solution (30 mL). The solution was extracted with DCM (30 mL) twice. The combined organic layers were washed with brine, dried over Na<sub>2</sub>SO<sub>4</sub>, filtered, and concentrated in vacuo. The residue was purified on silica gel to provide **I-55** (382 mg, 86%). LCMS (FA):  $m/z$  = 412.1 (M+H).

**Step 3: rac-4-{(3-Chlorophenyl)[(triisopropylsilyl)oxy]methyl}thiophene-2-carbaldehyde (I-56).** rac-(4-{(3-Chlorophenyl)[(triisopropylsilyl)oxy]methyl}-2-thienyl)methanol (0.40 g, 0.98 mmol) was dissolved into DCM (50 mL), then MnO<sub>2</sub> (1.28 g, 14.7 mmol) was added to this solution. The reaction was stirred at rt overnight. The mixture was filtered through a celite pad and washed with DCM. The filtrate was concentrated in vacuo and the residue was purified on

silica gel to provide **I-56** as a white solid (372 mg, 93%).  $^1\text{H}$  NMR ( $\text{CDCl}_3$ )  $\delta$  9.82 (d, 1H,  $J$  = 1.2 Hz), 7.65 (q, 1H,  $J$  = 1.3 Hz), 7.60 (d, 1H,  $J$  = 1.4 Hz), 7.40 (s, 1H), 7.30–7.26 (m, 2H), 7.23 (ddt, 1H,  $J$  = 6.6, 4.5, 2.6 Hz), 5.86 (s, 1H), 1.16–1.05 (m, 3H), 1.04–0.96 (m, 18H).

### Synthesis of 30 and 31

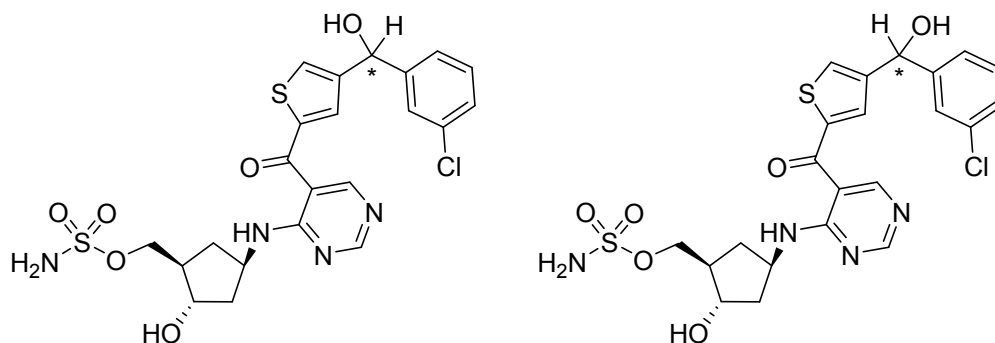

**30 and 31**

**[(1*R*,2*S*,4*R*)-4-{{5-({4-[(*R*)-(3-Chlorophenyl)(hydroxy)methyl]-2-thienyl}carbonyl)pyrimidin-4-yl}amino}-2-hydroxycyclopentyl]methyl sulfamate and [(1*R*,2*S*,4*R*)-4-{{5-({4-[(*S*)-(3-Chlorophenyl)(hydroxy)methyl]-2-thienyl}carbonyl)pyrimidin-4-yl}amino}-2-hydroxycyclopentyl]methyl sulfamate (**30 and 31**). Prepared by the method described for the preparation of **26** using 4-chloro-5-iodopyrimidine and intermediate **I-56** in Step 2. The following alternative conditions were employed in the reaction scheme: Step 3: oxidant used was  $\text{MnO}_2$ ; Step 4: Base/solvent used was *N,N*-diisopropylethylamine/*i*-PrOH; Step 7: desilylating agent/solvent used was TFA/water. The individual diastereomers were obtained using preparative scale chiral SCF.**

**30**:  $^1\text{H}$  NMR (MeOD)  $\delta$  8.67 (s, 1H), 8.56 (s, 1H), 7.72 (s, 1H), 7.54 (s, 1H), 7.43 (s, 1H), 7.34–7.29 (m, 2H), 7.28–7.20 (m, 1H), 5.84 (s, 1H), 4.82–4.70 (m, 1H), 4.22–4.11 (m, 3H), 2.53–2.40 (m, 2H), 2.28–2.18 (m, 1H), 2.17–2.08 (m, 1H), 1.44–1.36 (m, 1H). LCMS (FA):  $m/z$  = 539.1 (M+H).

**31**:  $^1\text{H}$  NMR (MeOD)  $\delta$  8.67 (s, 1H), 8.56 (s, 1H), 7.72 (s, 1H), 7.54 (s, 1H), 7.43 (s, 1H), 7.34–7.29 (m, 2H), 7.28–7.20 (m, 1H), 5.84 (s, 1H), 4.82–4.70 (m, 1H), 4.22–4.11 (m, 3H), 2.53–2.40 (m, 2H), 2.28–2.18 (m, 1H), 2.17–2.08 (m, 1H), 1.42–1.34 (m, 1H). LCMS (FA):  $m/z$  = 539.1 (M+H). HRMS  $m/z$  [M+H] $^+$  calcd for  $\text{C}_{22}\text{H}_{24}\text{ClN}_4\text{O}_6\text{S}_2$  539.0826, obsd 539.0828.

### Synthesis of Intermediate I-60

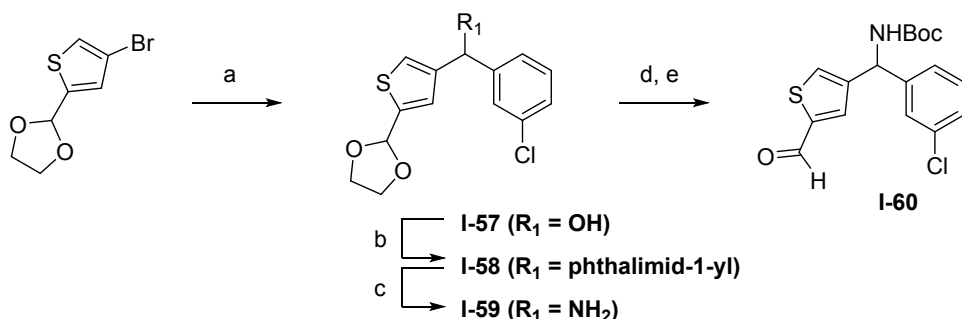

Reagents: (a) 3-chlorobenzaldehyde, *n*-BuLi, THF, -78 °C, 0.5 h, 67%; (b) phthalimide, DIAD, PPh<sub>3</sub>, THF, 70 °C, 49%; (c) hydrazine hydrate, MeOH, rt, 12 h, 32%; (d) 0.2N HCl in EtOH, H<sub>2</sub>O, rt, 12 h; (e) (Boc)<sub>2</sub>O, DIPEA, THF, 45 °C, 2 h, 77% for 2 steps.

**Step 1: rac-(3-Chlorophenyl)[5-(1,3-dioxolan-2-yl)-3-thienyl]methanol (I-57).** To a -78 °C cooled solution of 2.50 M of *n*-BuLi in hexane (4.08 mL, 10.2 mmol) in THF (40 mL) was added a solution of 2-(4-bromothiophen-2-yl)-1,3-dioxolane (2.00 g, 8.50 mmol) in THF (4 mL) dropwise. Immediately after addition was complete 3-chlorobenzaldehyde (0.97 mL, 8.50 mmol) was added dropwise (~2 min) as a solution in THF (4 mL). The resulting mixture was allowed to stir 30 min at -78 °C. The reaction was quenched with water before warming all the way to rt. The mixture was extracted with EtOAc twice and the combined organic layers were dried over MgSO<sub>4</sub>, filtered, and concentrated. The crude product was purified on silica gel to provide **I-57** (1.7 g, 67%). <sup>1</sup>H NMR (CDCl<sub>3</sub>) δ 7.42 (s, 1H), 7.35–7.24 (m, 4H), 7.21 (s, 1H), 7.06 (s, 1H), 6.04 (s, 1H), 5.82 (d, 1H, *J* = 3.6 Hz), 4.21–3.94 (m, 4H).

**Step 2: rac-2-[(3-Chlorophenyl)[5-(1,3-dioxolan-2-yl)-3-thienyl]methyl]-1*H*-isoindole-1,3(2*H*)-dione (I-58).** rac-(3-Chlorophenyl)[5-(1,3-dioxolan-2-yl)-3-thienyl]methanol (827 mg, 2.79 mmol), phthalimide (656 mg, 4.46 mmol) and triphenylphosphine (1.32 g, 5.02 mmol) were dissolved into THF (40 mL), then diisopropyl azodicarboxylate (0.99 mL, 5.02 mmol) was added to this solution at rt. The reaction was heated at 70 °C for 5 h. The reaction mixture was concentrated in vacuo and the residue was purified on silica gel to give **I-58** as a white solid (586 mg, 49%). <sup>1</sup>H NMR (CDCl<sub>3</sub>) δ 7.93–7.79 (m, 2H), 7.78–7.70 (m, 2H), 7.35 (m, 1H), 7.28 (d, 1H, *J* = 1.4 Hz), 7.26 (d, 2H, *J* = 1.1 Hz), 7.21 (m, 1H), 6.63 (s, 1H), 6.05 (s, 1H), 4.14–4.11 (m, 2H), 4.04–3.96 (m, 2H).

**Step 3: rac-1-(3-Chlorophenyl)-1-[5-(1,3-dioxolan-2-yl)-3-thienyl]methanamine (I-59).** rac-2-[(3-Chlorophenyl)[5-(1,3-dioxolan-2-yl)-3-thienyl]methyl]-1*H*-isoindole-1,3(2*H*)-dione (432 mg, 1.01 mmol) was dissolved into MeOH (15 mL), then hydrazine hydrate (508 mg, 10.1 mmol) was added to this solution. The reaction was stirred at rt overnight. The mixture was poured into 30 mL water and extracted with DCM (20 mL) three times. The combined organic layers were concentrated and the residue was purified on silica gel to provide **I-59** (95 mg, 32%). <sup>1</sup>H NMR (CDCl<sub>3</sub>) δ 7.38 (s, 1H), 7.29–7.20 (m, 3H), 7.20–7.13 (d, 1H), 7.03 (d, 1H), 6.02 (s, 1H), 5.15 (s, 1H), 4.20–4.09 (m, 2H), 4.04–3.96 (m, 2H), 1.93–1.67 (m, 2H).

**Step 4: rac-*tert*-Butyl [(3-chlorophenyl)(5-formyl-3-thienyl)methyl]carbamate (I-60).** rac-1-(3-Chlorophenyl)-1-[5-(1,3-dioxolan-2-yl)-3-thienyl]methanamine (297 mg, 1.00 mmol) was dissolved into a solution of 0.2 M HCl in EtOH (15.0 mL, 3.0 mmol) and water (0.20 mL, 11 mmol). The reaction was stirred at rt overnight and then was concentrated in vacuo. The residues

were dissolved in THF (15 mL). To the solution was added *N,N*-diisopropylethylamine (0.70 mL, 4.02 mmol) followed by di-*tert*-butyldicarbonate (658 mg, 3.02 mmol) and the mixture was heated at 45 °C for 2 h. The reaction mixture was concentrated in vacuo and the residue was purified on silica gel to give **I-60** (273 mg, 77%). <sup>1</sup>H NMR (CDCl<sub>3</sub>) δ 9.84 (d, 1H, *J* = 1.3 Hz), 7.57 (d, 1H, *J* = 1.4 Hz), 7.46 (q, 1H, *J* = 1.3 Hz), 7.32–7.28 (m, 2H), 7.29–7.26 (m, 1H), 7.18–7.14 (m, 1H), 5.96 (s, 1H), 5.24 (d, 1H, *J* = 8.0 Hz), 1.44 (s, 9H).

### Synthesis of 32 and 33

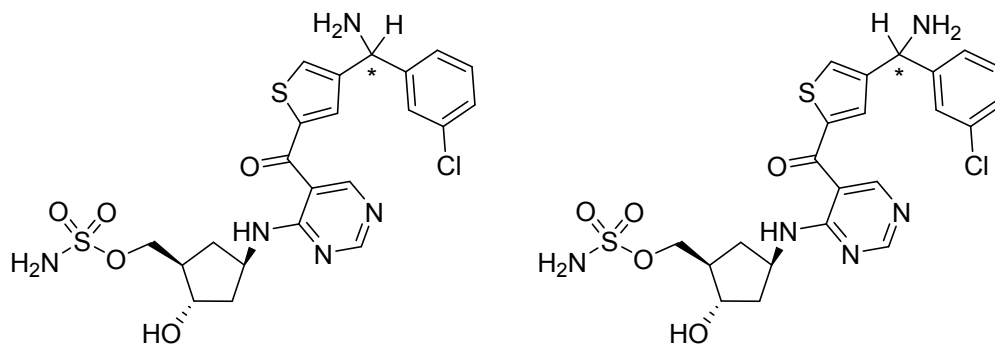

**32 and 33**

**[(1*R*,2*S*,4*R*)-4-{{5-({4-[(*R*)-Amino(3-chlorophenyl)methyl]-2-thienyl}carbonyl)pyrimidin-4-yl}amino}-2-hydroxycyclopentyl)methyl sulfamate and [(1*R*,2*S*,4*R*)-4-{{5-({4-[(*S*)-Amino(3-chlorophenyl)methyl]-2-thienyl}carbonyl)pyrimidin-4-yl}amino}-2-hydroxycyclopentyl)methyl sulfamate (**32 and 33**).**

Prepared by the method described for the preparation of **26** using 4-chloro-5-iodopyrimidine and intermediate **I-60** in Step 2. The following alternative conditions were employed in the reaction scheme: Step 3: oxidant used was MnO<sub>2</sub>; Step 4: Base/solvent used was *N,N*-diisopropylethylamine/*i*-PrOH; Step 7: desilylating agent/solvent used was TFA/water. The individual diastereomers were obtained using preparative scale chiral HPLC.

**32:** <sup>1</sup>H NMR (MeOD) δ 8.70 (s, 1H), 8.59 (s, 1H), 7.83 (s, 1H), 7.68 (s, 1H), 7.51 (s, 1H), 7.47–7.33 (m, 3H), 5.55 (s, 1H), 4.81 (dd, 1H, *J* = 15.9, 8.0 Hz), 4.20 (qd, 3H, *J* = 9.9, 5.8 Hz), 2.57–2.45 (m, 1H), 2.29 (dt, 1H, *J* = 14.0, 7.0 Hz), 2.17 (ddd, 1H, *J* = 12.6, 11.2, 7.4 Hz), 1.94–1.80 (m, 1H), 1.48–1.39 (m, 1H). LCMS (FA): *m/z* = 538.1 (M+H). HRMS *m/z* [M+H]<sup>+</sup> calcd for C<sub>22</sub>H<sub>25</sub>ClN<sub>5</sub>O<sub>5</sub>S<sub>2</sub> 538.0986, obsd 538.0978.

**33:** <sup>1</sup>H NMR (MeOD) δ 8.73 (s, 1H), 8.61 (s, 1H), 7.85 (s, 1H), 7.68 (s, 1H), 7.51 (s, 1H), 7.47–7.33 (m, 3H), 5.55 (s, 1H), 4.81 (dd, 1H, *J* = 15.9, 8.0 Hz), 4.20 (qd, 3H, *J* = 9.9, 5.8 Hz), 2.57–2.45 (m, 1H), 2.29 (dt, 1H, *J* = 14.0, 7.0 Hz), 2.17 (ddd, 1H, *J* = 12.6, 11.2, 7.4 Hz), 1.96–1.82 (m, 1H), 1.50–1.38 (m, 1H). LCMS (FA): *m/z* = 538.1 (M+H). HRMS *m/z* [M+H]<sup>+</sup> calcd for C<sub>22</sub>H<sub>25</sub>ClN<sub>5</sub>O<sub>5</sub>S<sub>2</sub> 538.0986, obsd 538.0980.

### Synthesis of Intermediate I-61

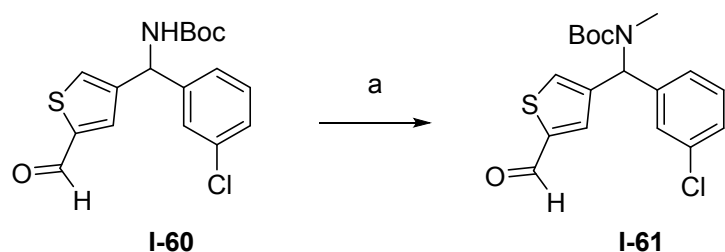

Reagents: (a) MeI, NaH, THF, 60 °C, 0.5 h, 48%.

**Step 1: rac-tert-Butyl [(3-chlorophenyl)(5-formyl-3-thienyl)methyl]methylcarbamate (I-61).**

To a solution of rac-tert-butyl [(3-chlorophenyl)(5-formyl-3-thienyl)methyl]carbamate **I-60** (102 mg, 0.29 mmol) in THF (10.0 mL) was added 60% NaH in mineral oil (25.0 mg, 1.04 mmol) at rt and the mixture was stirred for 30 min. To the mixture was added methyl iodide (0.13 mL, 2.08 mmol) and the reaction was heated at 60 °C for 30 min. The reaction mixture was poured into 30 mL water and extracted with DCM (30 mL) twice. The combined organic layers were concentrated in vacuo and the residue was purified on silica gel to provide **I-61** (50 mg, 48%). <sup>1</sup>H NMR (CDCl<sub>3</sub>) δ 9.92 (s, 1H), 7.61 (s, 1H), 7.54–7.45 (m, 1H), 7.35–7.32 (m, 2H), 7.25–7.22 (m, 1H), 7.16–7.11 (m, 1H), 6.61 (s, 1H), 2.73 (s, 3H), 1.49 (s, 9H).

**Synthesis of 34**

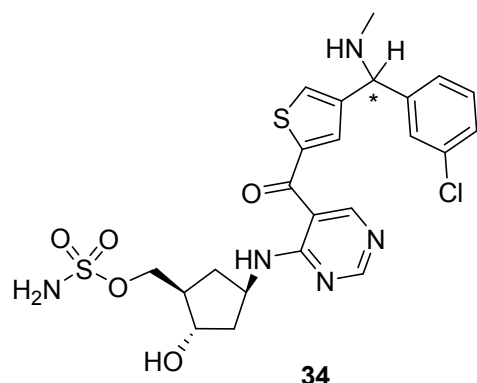

**[(1R,2S,4R)-4-{{5-({4-[(R)-(3-Chlorophenyl)(methylamino)methyl]-2-thienyl}carbonyl)pyrimidin-4-yl}amino}-2-hydroxycyclopentyl]methyl sulfamate and [(1R,2S,4R)-4-{{5-({4-[(S)-(3-Chlorophenyl)(methylamino)methyl]-2-thienyl}carbonyl)pyrimidin-4-yl}amino}-2-hydroxycyclopentyl]methyl sulfamate (34).**

Prepared by the method described for the preparation of **26** using 4-chloro-5-iodopyrimidine and intermediate **I-61** in Step 2. The following alternative conditions were employed in the reaction scheme: Step 3: oxidant used was MnO<sub>2</sub>; Step 4: Base/solvent used was *N,N*-diisopropylethylamine/*i*-PrOH; Step 7: desilylating agent/solvent used was TFA/water.

Compound is a mixture of diastereomers. <sup>1</sup>H NMR (MeOD) δ 8.58 (s, 1H), 8.48 (s, 1H), 7.70 (d, 1H, *J* = 0.7 Hz), 7.54 (d, 1H, *J* = 1.3 Hz), 7.39–7.31 (m, 1H), 7.29–7.22 (m, 2H), 7.22–7.14 (m, 1H), 4.82 (s, 1H), 4.74–4.57 (m, 1H), 4.07 (ddd, 3H, *J* = 21.1, 9.0, 5.1 Hz), 2.46–2.32 (m, 1H), 2.27 (s, 3H), 2.15 (td, 1H, *J* = 8.6, 5.6 Hz), 2.08–2.00 (m, 1H), 1.84–1.74 (m, 1H), 1.35–1.29 (m,



<sup>1</sup>H). LCMS (FA):  $m/z$  = 552.1 (M+H). HRMS  $m/z$  [M+H]<sup>+</sup> calcd for C<sub>23</sub>H<sub>27</sub>ClN<sub>5</sub>O<sub>5</sub>S<sub>2</sub> 552.1142, obsd 552.1141.

## Synthesis of 35

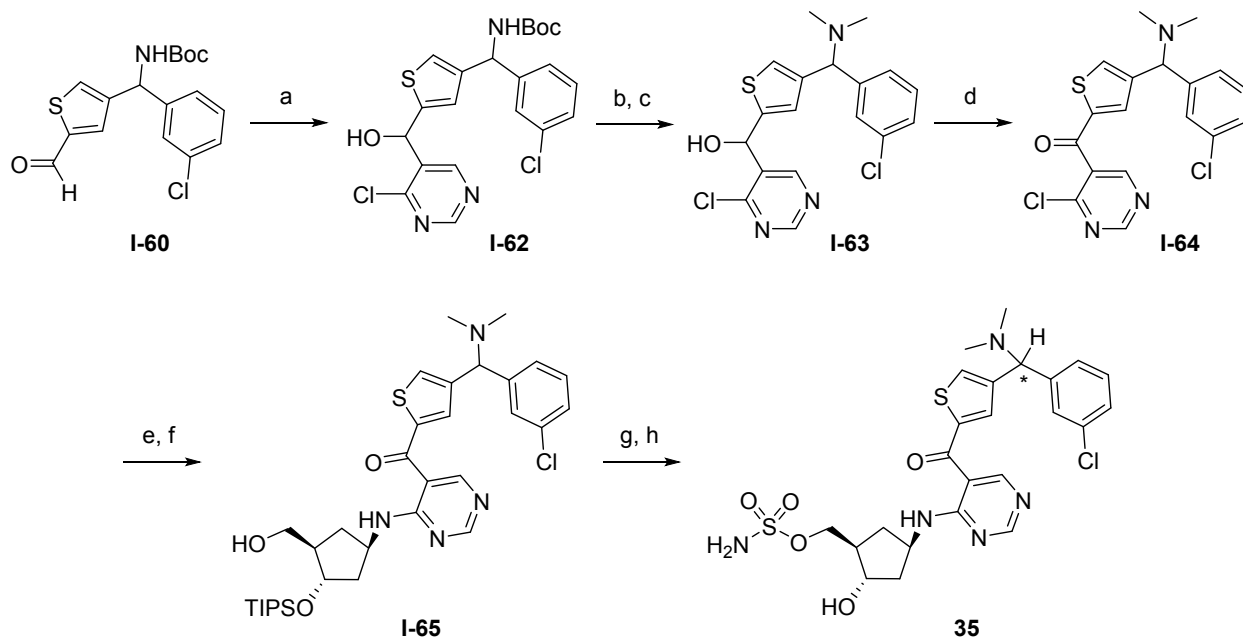

Reagents: (a) 4-chloro-5-iodopyrimidine, *n*-BuLi, THF, -78 °C, 0.5 h, 72%; (b) TFA, H<sub>2</sub>O, 50 °C, 0.5 h; (c) HCHO, NaBH(OAc)<sub>3</sub>, DIPEA, MeOH, rt, 12 h, 27% for 2 steps; (d) MnO<sub>2</sub>, DCM, 40 °C, 2 h, 94%; (e) **I-31**, DIPEA, *i*-PrOH, 60 °C, 1 h; (f) 1% HCl in EtOH, rt, 0.5 h, 87% for 2 steps; (g) chlorosulfonamide, DMF, rt, 0.5 h; (h) TFA, H<sub>2</sub>O, 50 °C, 0.5 h, 70% for 2 steps.

**Step 1: *tert*-Butyl [(*S*)-(3-chlorophenyl){5-[(*S*)-(4-chloropyrimidin-5-yl)(hydroxymethyl)-3-thienyl]methyl]carbamate, *tert*-Butyl [(*S*)-(3-chlorophenyl){5-[(*R*)-(4-chloropyrimidin-5-yl)(hydroxymethyl)-3-thienyl]methyl]carbamate, *tert*-Butyl [(*R*)-(3-chlorophenyl){5-[(*S*)-(4-chloropyrimidin-5-yl)(hydroxymethyl)-3-thienyl]methyl]carbamate, and *tert*-Butyl [(*R*)-(3-chlorophenyl){5-[(*R*)-(4-chloropyrimidin-5-yl)(hydroxymethyl)-3-thienyl]methyl]carbamate (**I-62**).** A solution of 4-chloro-5-iodopyrimidine (293 mg, 1.22 mmol) in THF (10.0 mL) was cooled at -78 °C. To the solution was added dropwise 2.50 M of *n*-BuLi in hexane (1.14 mL, 2.85 mmol) and the mixture was stirred for 10 min. To the mixture was added dropwise a solution of *tert*-butyl [(3-chlorophenyl)(5-formyl-3-thienyl)methyl]carbamate **I-60** (143 mg, 0.41 mmol) in THF (3.0 mL) at -78 °C, and the resulting mixture was stirred for 30 min at -78 °C. The reaction was quenched by addition of a solution of acetic acid (0.23 mL, 4.06 mmol) in THF (1.0 mL) at -78 °C and the mixture was warmed to rt. To the mixture was added 30 mL water and extracted with EtOAc (30 mL) three times. The combined organic layers were washed with brine, dried over Na<sub>2</sub>SO<sub>4</sub>, filtered, and concentrated in vacuo. The residue was purified on silica gel to give **I-62** (136 mg, 72%). <sup>1</sup>H NMR (CDCl<sub>3</sub>) δ 8.95 (d, 1H, *J* = 4.9 Hz), 8.91 (s, 1H), 7.30–7.24 (m, 2H), 7.22 (s, 1H), 7.14–7.10 (m, 1H), 6.94 (s, 1H), 6.85 (s, 1H), 6.25 (s, 1H), 5.96–5.38 (m, 2H), 5.28–5.14 (br s, 1H), 1.41 (s, 9H).

**Step 2: (*S*)-(4-Chloropyrimidin-5-yl){4-[(*S*)-(dimethylamino)(phenyl)methyl]-2-thienyl}methanol, (*S*)-(4-Chloropyrimidin-5-yl){4-[(*R*)-(dimethylamino)(phenyl)methyl]-2-thienyl}methanol, (*R*)-(4-Chloropyrimidin-5-yl){4-[(*S*)-(dimethylamino)(phenyl)methyl]-2-thienyl}methanol, and (*R*)-(4-Chloropyrimidin-5-yl){4-[(*R*)-(dimethylamino)(phenyl)methyl]-2-thienyl}methanol (**I-63**).** The product mixture prepared in step 1 (723 mg, 1.55 mmol) was dissolved in a solution of TFA (24.0 mL, 311 mmol) and water (6.00 mL, 333 mmol). The mixture was heated at 50 °C for 30 min. The reaction mixture was concentrated in vacuo and the residue was diluted with 30 mL MeOH, and 1 mL *N,N*-diisopropylethylamine was added to neutralize the solution. To the solution was added formaldehyde (1.73 mL, 23.3 mmol) followed by sodium triacetoxyborohydride (2.96 g, 14.0 mmol) at rt and the resulting mixture was stirred overnight. The reaction mixture was poured into 50 mL water, and then extracted with DCM (50 mL) twice. The combined organic layers were concentrated in vacuo and the residue was purified on silica gel to give **I-63** (163 mg, 27%). <sup>1</sup>H NMR (CDCl<sub>3</sub>) δ 9.01 (s, 1H), 8.89 (s, 1H), 7.37 (d, 1H, *J* = 1.8 Hz), 7.29–7.25 (m, 1H), 7.25–7.18 (m, 2H), 7.15 (d, 1H, *J* = 1.3 Hz), 7.08 (s, 1H), 6.24 (s, 1H), 6.11–5.65 (br s, 1H), 4.19 (s, 1H), 2.14 (s, 6H).

**Step 3: rac-{4-[(3-Chlorophenyl)(dimethylamino)methyl]-2-thienyl}(4-chloropyrimidin-5-yl)methanone (**I-64**).** To a solution of the products from step 2 (163 mg, 0.41 mmol) in DCM (18.0 mL) was added MnO<sub>2</sub> (539 mg, 6.20 mmol), and the reaction was stirred at rt overnight. To the mixture was added MnO<sub>2</sub> (180 mg, 2.07 mmol), and the reaction was stirred at 40 °C for 2 h. The reaction mixture was filtered through a celite pad and the filter cake was washed with DCM. The filtrate was concentrated in vacuo to give **I-64** as a white solid (152 mg, 94%). <sup>1</sup>H NMR (CDCl<sub>3</sub>) δ 9.13 (s, 1H), 8.75 (s, 1H), 7.68 (s, 1H), 7.45 (s, 1H), 7.32 (s, 1H), 7.28–7.17 (m, 3H), 4.25 (s, 1H), 2.16 (s, 6H).

**Step 4: {4-[(*S*)-(3-Chlorophenyl)(dimethylamino)methyl]-2-thienyl}[4-((1*R*,3*R*,4*S*)-3-(hydroxymethyl)-4-[(triisopropylsilyl)oxy]cyclopentyl)amino]pyrimidin-5-yl}methanone and {4-[(*R*)-(3-Chlorophenyl)(dimethylamino)methyl]-2-thienyl}[4-((1*R*,3*R*,4*S*)-3-(hydroxymethyl)-4-[(triisopropylsilyl)oxy]cyclopentyl)amino]pyrimidin-5-yl}methanone (**I-65**).** To the product from step 3 (203.5 mg, 0.52 mmol), (1*R*,3*R*,4*S*)-3-([tert-butyl(dimethyl)silyl]oxy)methyl-4-[(triisopropylsilyl)oxy]cyclopentanamine **I-31** (416.8 mg, 1.04 mmol) and *N,N*-diisopropylethylamine (0.36 mL, 2.08 mmol) was added *i*-PrOH (20.0 mL). The reaction was stirred at 60 °C for 1 h. The reaction was concentrated in vacuo, and then 1% HCl in EtOH solution (40 mL) was added to the residues. The reaction was stirred at rt for 30 min. The solution was poured into 1N NaOH solution (40 mL) and the mixture was extracted with DCM twice. The combined organic layers were concentrated in vacuo and purified on silica gel to provide **I-65** (289 mg, 87%). LCMS (FA): *m/z* = 645.6 (M+H).

**Step 5: [(1*R*,2*S*,4*R*)-4-{[5-({4-[(*S*)-(3-Chlorophenyl)(dimethylamino)methyl]-2-thienyl}carbonyl)pyrimidin-4-yl]amino}-2-hydroxycyclopentyl]methyl sulfamate and [(1*R*,2*S*,4*R*)-4-{[5-({4-[(*R*)-(3-Chlorophenyl)(dimethylamino)methyl]-2-thienyl}carbonyl)pyrimidin-4-yl]amino}-2-hydroxycyclopentyl]methyl sulfamate (**35**).** To a solution of the products from step 4 (275 mg, 0.43 mmol) in DMF (6.0 mL) was added chlorosulfonamide (148 mg, 1.28 mmol) at rt and the reaction was stirred for 30 min. The reaction was poured into a solution of saturated NaHCO<sub>3</sub> and the mixture was extracted with

EtOAc three times. The combined organic layers were concentrated in vacuo. The residues were dissolved into a solution of TFA (16.0 mL, 208 mmol) and water (4.0 mL). The mixture was stirred at 50 °C for 30 min. The reaction mixture was concentrated in vacuo and MeOH (5 mL) was added to the residue and then 1N NaOH solution was added to the mixture to basify it to pH 12. After concentration, the residue was purified on silica gel to provide **35** (168 mg, 70%). Compound is a mixture of diastereomers. <sup>1</sup>H NMR (MeOD) δ 8.66 (s, 1H), 8.57 (s, 1H), 7.82 (s, 1H), 7.69 (s, 1H), 7.46 (s, 1H), 7.39–7.36 (m, 1H), 7.33–7.29 (m, 1H), 7.25–7.22 (m, 1H), 4.81–4.73 (m, 1H), 4.39 (s, 1H), 4.22–4.12 (m, 3H), 2.51–2.44 (m, 1H), 2.29–2.10 (m, 2H), 2.21 (s, 6H), 1.92–1.85 (m, 1H), 1.43–1.34 (m, 1H). LCMS (FA): *m/z* = 566.1 (M+H). HRMS *m/z* [M+H]<sup>+</sup> calcd for C<sub>24</sub>H<sub>29</sub>ClN<sub>5</sub>O<sub>5</sub>S<sub>2</sub> 566.1299, obsd 566.1318.

## Procedures for the syntheses of compounds in Table 6

### Synthesis of Intermediate I-69

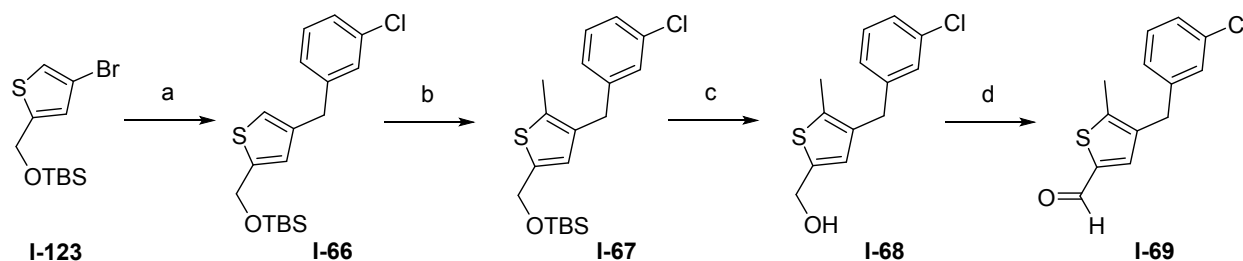

Reagents: (a) 3-chlorobenzylzinc chloride, Pd<sub>2</sub>(dba)<sub>3</sub>, *t*-Bu<sub>3</sub>PBHF<sub>4</sub>, THF, 50 °C, 1 h, 92%; (b) MeI, *n*-BuLi, THF, -78 °C, 0.5 h, 82%; (c) 1% HCl in EtOH, EtOH, rt, 0.5 h, 78%; (d) MnO<sub>2</sub>, DCM, rt, 6 h, 90%.

**Step 1: *tert*-Butyl{[4-(3-chlorobenzyl)-2-thienyl]methoxy}dimethylsilane (I-66).** A 20 mL microwave vessel was charged with ((4-bromothiophen-2-yl)methoxy)(*tert*-butyl)dimethylsilane (**I-123**, 425 mg, 1.38 mmol), Pd<sub>2</sub>(dba)<sub>3</sub> (25.3 mg, 0.03 mmol), and tri-*tert*-butylphosphonium tetrafluoroborate (16.1 mg, 0.06 mmol). To the mixture was added THF (18.2 mL) and the reaction vessel was purged with argon followed by sealing with a cap. After the mixture was stirred for 5 min at rt, 0.5 M of 3-chlorobenzylzinc chloride in THF solution (3.18 mL, 1.59 mmol) was added to the mixture. The reaction was heated at 50 °C for 1 h. The reaction was cooled to rt and diluted with EtOAc. The organic layer was filtered through a celite pad and the filtrate was washed with water followed by brine. The EtOAc layer was filtered and the filtrate was concentrated in vacuo. The residue was purified on silica gel to provide **I-66** as a colorless oil (475 mg, 92%). <sup>1</sup>H NMR (DMSO-*d*<sub>6</sub>) δ 7.35–7.17 (m, 4H), 7.12 (s, 1H), 6.80 (s, 1H), 4.77 (s, 2H), 3.88 (s, 2H), 0.86 (s, 9H), 0.04 (s, 6H).

**Step 2: *tert*-Butyl{[4-(3-chlorobenzyl)-5-methyl-2-thienyl]methoxy}dimethylsilane (I-67).** *tert*-Butyl{[4-(3-chlorobenzyl)-2-thienyl]methoxy}dimethylsilane (0.67 g, 1.90 mmol) was dissolved into THF (10.0 mL), and then cooled down at -78 °C. 2.50 M of *n*-BuLi in hexane (6.08 mL, 15.2 mmol) was added dropwise via syringe to this solution at -78 °C and the mixture

was stirred for 30 min. To the mixture was added methyl iodide (1.18 mL, 19.0 mmol) and the reaction was stirred at -78 °C for 30 min. The reaction was quenched by addition of 30 mL water at -78 °C and the mixture was warmed to rt. The resulting mixture was extracted with DCM (30 mL) twice. The organic layers were combined and concentrated in vacuo to yield **I-67** (574 mg, 82%). <sup>1</sup>H NMR (CDCl<sub>3</sub>) δ 7.12–7.08 (m, 2H), 7.03 (s, 1H), 6.94 (d, 1H, *J* = 7.1 Hz), 6.45 (s, 1H), 4.66 (s, 2H), 3.71 (s, 2H), 2.26 (s, 3H), 0.83 (s, 9H), 0.00 (s, 6H).

**Step 3: [4-(3-Chlorobenzyl)-5-methyl-2-thienyl]methanol (I-68).** *tert*-Butyl{[4-(3-chlorobenzyl)-5-methyl-2-thienyl]methoxy}dimethylsilane (0.62 g, 1.69 mmol) was dissolved into 20 mL of 1% HCl in EtOH solution and the mixture was stirred at rt for 30 min. The solution was poured into 30 mL saturated NaHCO<sub>3</sub> solution and the mixture was extracted with DCM (30 mL) twice. The combined organics were concentrated in vacuo and the mixture was purified on silica gel to yield **I-68** (332 mg, 78%). <sup>1</sup>H NMR (CDCl<sub>3</sub>) δ 7.26–7.17 (m, 2H), 7.14 (s, 1H), 7.05 (dd, 1H, *J* = 7.1, 1.7 Hz), 6.65 (s, 1H), 4.71 (s, 2H), 3.82 (s, 2H), 2.39 (s, 3H).

**Step 4: 4-(3-Chlorobenzyl)-5-methylthiophene-2-carbaldehyde (I-69).** To a solution of [4-(3-chlorobenzyl)-5-methyl-2-thienyl]methanol (324 mg, 1.28 mmol) in DCM (40 mL) was added MnO<sub>2</sub> (1.67 g, 19.2 mmol) and the mixture was stirred at rt for 6 h. The reaction mixture was filtered through a celite pad and the filter cake was washed with DCM several times. The filtrate was concentrated in vacuo to yield **I-69** (289 mg, 90%). <sup>1</sup>H NMR (CDCl<sub>3</sub>) δ 9.76 (s, 1H), 7.42 (s, 1H), 7.30–7.19 (m, 2H), 7.14 (s, 1H), 7.11–7.00 (m, 1H), 3.90 (s, 2H), 2.48 (s, 3H).

## Synthesis of 36

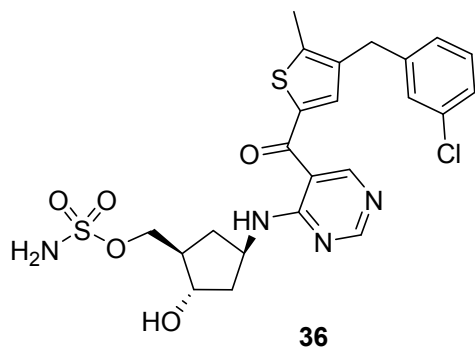

**{(1*R*,2*S*,4*R*)-4-[(5-{[4-(3-Chlorobenzyl)-5-methyl-2-thienyl]carbonyl}pyrimidin-4-yl)amino]-2-hydroxycyclopentyl}methyl sulfamate (36).**

Prepared by the method described for the preparation of **26** using 4-chloro-5-iodopyrimidine and intermediate **I-69** in Step 2. The following alternative conditions were employed in the reaction scheme: Step 3: oxidant used was MnO<sub>2</sub>; Step 4: Base/solvent used was *N,N*-diisopropylethylamine/*i*-PrOH; Step 7: desilylating agent/solvent used was TFA/water. <sup>1</sup>H NMR (MeOD) δ 8.63 (s, 1H), 8.53 (s, 1H), 7.39 (s, 1H), 7.27–7.23 (m, 1H), 7.19–7.17 (m, 2H), 7.11–7.09 (m, 1H), 4.79–4.71 (m, 1H), 4.22–4.15 (m, 3H), 3.94 (s, 2H), 2.50–2.44 (m, 1H), 2.45 (s, 3H), 2.26–2.24 (m, 1H), 2.16–2.10 (m, 1H), 1.90–1.83 (m, 1H), 1.42–1.37 (m, 1H). LCMS (FA): *m/z* = 537.1 (M+H). HRMS *m/z* [M+H]<sup>+</sup> calcd for C<sub>23</sub>H<sub>26</sub>ClN<sub>4</sub>O<sub>5</sub>S<sub>2</sub> 537.1033, obsd 537.1064.

## Synthesis of Intermediate I-71

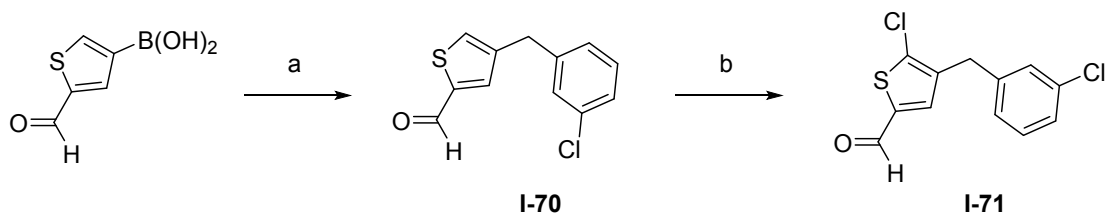

Reagents: (a) 3-chlorobenzyl bromide,  $\text{Pd(PPh}_3)_4$ ,  $\text{Na}_2\text{CO}_3$ , 1,4-dioxane,  $\text{H}_2\text{O}$ , 80 °C, 58%; (b) NCS, DMF, 50 °C, 3 h, 48%.

**Step 1: 4-(3-Chlorobenzyl)thiophene-2-carbaldehyde (I-70).** A round bottom flask was charged with 2-formyl-4-thiopheneboronic acid (0.30 g, 1.92 mmol), 3-chlorobenzyl bromide (0.28 mL, 2.12 mmol), and  $\text{Na}_2\text{CO}_3$  (0.41 g, 3.85 mmol). To the reaction vessel was added 1,4-dioxane (12 mL) and water (2 mL) followed by  $\text{Pd(PPh}_3)_4$  (0.22 g, 0.19 mmol) at room temperature. The mixture was heated at 80 °C for 2 h under atmosphere of argon. After cooling to room temperature, to the reaction mixture was added water and extracted with EtOAc twice. The combined organic layers were washed with brine, dried over  $\text{Na}_2\text{SO}_4$ , filtered, and concentrated in vacuo. The residue was purified by silica gel to give **I-70** (0.26 g, 58%).  $^1\text{H}$  NMR ( $\text{DMSO-}d_6$ )  $\delta$  9.86 (d, 1H,  $J = 1.0$  Hz), 7.87 (s, 2H), 7.39–7.31 (m, 2H), 7.31–7.22 (m, 2H), 4.01 (s, 2H). LCMS (FA):  $m/z = 237.1$  (M+H).

**Step 2: 5-Chloro-4-(3-chlorobenzyl)thiophene-2-carbaldehyde (I-71).** To a solution of 4-(3-chlorobenzyl)thiophene-2-carbaldehyde (265 mg, 1.12 mmol) and NCS (224 mg, 1.68 mmol) in DMF (5.0 mL) was stirred at 50 °C for 3 h. The reaction mixture was quenched with water and extracted with EtOAc. The combined organic layers were washed with 10% aqueous LiCl, dried over  $\text{MgSO}_4$ , filtered and concentrated in vacuo and the crude material was purified by silica gel to give **I-71** as a clear oil (147 mg, 48%).  $^1\text{H}$  NMR ( $\text{DMSO-}d_6$ )  $\delta$  9.78 (s, 1H), 7.89 (s, 1H), 7.40–7.29 (m, 3H), 7.24–7.19 (m, 1H), 4.00 (s, 2H). LCMS (FA):  $m/z = 271.1$  (M+H).

## Synthesis of 37

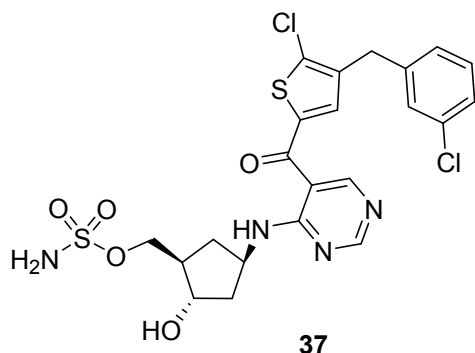

**{(1R,2S,4R)-4-[(5-{[5-Chloro-4-(3-chlorobenzyl)-2-thienyl]carbonyl}pyrimidin-4-yl)amino]-2-hydroxycyclopentyl}methyl sulfamate (37).**

Prepared by the method described for the preparation of **26** using 4-chloro-5-iodopyrimidine and intermediate **I-71** in Step 2. The following alternative conditions were employed in the reaction scheme: Step 3: oxidant used was MnO<sub>2</sub>; Step 4: Base/solvent used was *N,N*-diisopropylethylamine/*i*-PrOH. <sup>1</sup>H NMR (DMSO-*d*<sub>6</sub>) δ 8.70 (s, 1H), 8.66 (s, 1H), 8.20 (d, 1H, *J* = 7.5 Hz), 7.80 (s, 1H), 7.44 (s, 2H), 7.36 (d, 1H, *J* = 1.6 Hz), 7.33 (d, 1H, *J* = 7.5 Hz), 7.30–7.26 (m, 1H), 7.25–7.21 (m, 1H), 4.90 (d, 1H, *J* = 4.4 Hz), 4.75–4.64 (m, 1H), 4.11–4.03 (m, 1H), 3.99 (d, 2H, *J* = 10.4 Hz), 3.98–3.90 (m, 2H), 2.34–2.25 (m, 1H), 2.14–2.08 (m, 1H), 1.98–1.92 (m, 1H), 1.82–1.73 (m, 1H), 1.30–1.21 (m, 1H). LCMS (FA): *m/z* = 557.2 (M+H). HRMS *m/z* [M+H]<sup>+</sup> calcd for C<sub>22</sub>H<sub>23</sub>Cl<sub>2</sub>N<sub>4</sub>O<sub>5</sub>S<sub>2</sub> 557.0487, obsd 557.0502.

### Synthesis of Intermediate I-73

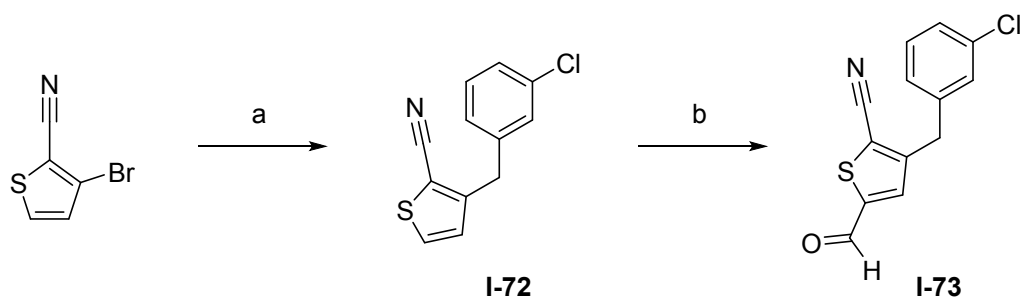

Reagents: (a) 3-chlorobenzylzinc chloride, Pd<sub>2</sub>(dba)<sub>3</sub>, *t*-Bu<sub>3</sub>PBHF<sub>4</sub>, THF, 50 °C, 24 h, 59%; (b) *n*-BuLi, DMF, THF, -78 °C, 1 h, 50%.

**Step 1: 3-(3-Chlorobenzyl)thiophene-2-carbonitrile (I-72).** To a solution of 3-bromothiophene-2-carbonitrile (1.22 g, 6.50 mmol) in THF (20 mL) was added a 0.5 M solution of 3-chlorobenzylzinc chloride in THF (15.0 mL, 7.0 mmol). To this reaction mixture was added Pd<sub>2</sub>(dba)<sub>3</sub> (120 mg, 0.13 mmol) and tri-*t*-butylphosphonium tetrafluoroborate (74 mg, 0.26 mmol). The reaction mixture was stirred at 50 °C for 24 h then quenched with water and extracted with EtOAc. The combined organic layers were washed with brine, dried over magnesium sulfate, filtered and concentrated in vacuo. The crude material was purified on silica gel to give **I-72** as a clear oil (896 mg, 59%). <sup>1</sup>H NMR (MeOD) δ 7.83–7.73 (m, 1H), 7.38–7.13 (m, 4H), 7.12–7.02 (m, 1H), 4.15 (s, 2H).

**Step 2: 3-(3-Chlorobenzyl)-5-formylthiophene-2-carbonitrile (I-73).** To a -78 °C cooled solution of 3-(3-chlorobenzyl)thiophene-2-carbonitrile (150 mg, 0.64 mmol) in THF (6.04 mL) was added a 2.50 M solution of *n*-BuLi in hexane (0.39 mL, 0.96 mmol) dropwise, via syringe. The reaction mixture was allowed to stir for 20 min followed by addition of a solution of DMF (0.10 mL, 1.28 mmol) in THF (2 mL), dropwise, via syringe. The resulting mixture was stirred for an additional 1 h then quenched with water and extracted with EtOAc. The combined organic layers were washed with brine, dried over magnesium sulfate, filtered and concentrated in vacuo. The crude material was purified on silica gel to provide **I-73** as a white solid (84 mg, 50%). <sup>1</sup>H NMR (MeOD) δ 10.76 (s, 1H), 8.81 (s, 1H), 8.29 – 8.13 (m, 3H), 8.07 (d, 1H, *J* = 7.4 Hz), 4.14 (s, 2H).

## Synthesis of 38

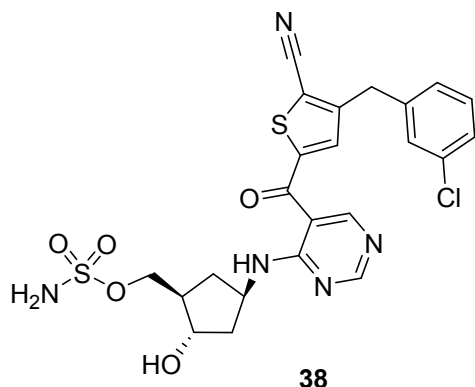

**{{(1*R*,2*S*,4*R*)-4-[(5-{[4-(3-Chlorobenzyl)-5-cyano-2-thienyl]carbonyl}pyrimidin-4-yl)amino]-2-hydroxycyclopentyl}methyl sulfamate (38).**

Prepared by the method described for the preparation of **26** using 4-chloro-5-iodopyrimidine and intermediate **I-73** in Step 2. The following alternative conditions were employed in the reaction scheme: Step 3: oxidant used was MnO<sub>2</sub>; Step 4: Base/solvent used was *N,N*-diisopropylethylamine/*i*-PrOH. <sup>1</sup>H NMR (DMSO-*d*<sub>6</sub>) δ 8.74 (s, 1H), 8.69 (s, 1H), 8.37 (d, 1H, *J* = 7.5 Hz), 7.91 (s, 1H), 7.46–7.39 (m, 2H), 7.39–7.34 (m, 1H), 7.33–7.29 (m, 1H), 7.28–7.23 (m, 1H), 4.73 (dd, 1H, *J* = 15.9, 8.0 Hz), 4.19 (s, 2H), 4.12–4.05 (m, 1H), 4.00–3.93 (m, 2H), 2.55 (s, 2H), 2.35–2.26 (m, 1H), 2.16–2.09 (m, 1H), 2.01–1.91 (m, 1H), 1.81–1.73 (m, 1H), 1.33–1.23 (m, 1H). LCMS (FA): *m/z* = 548.2 (M+H). HRMS *m/z* [M+H]<sup>+</sup> calcd for C<sub>23</sub>H<sub>23</sub>ClN<sub>5</sub>O<sub>5</sub>S<sub>2</sub> 548.0829, obsd 548.0849.

## Synthesis of Intermediate I-76

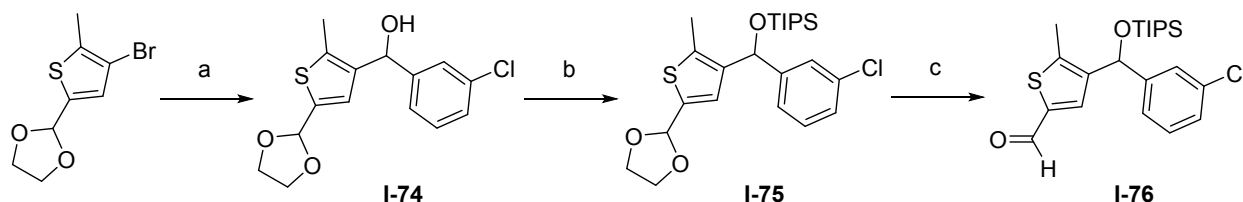

Reagents: (a) 3-chlorobenzaldehyde, *n*-BuLi, THF, -78 °C, 15 min, 68%; (b) TIPSCl, NaH, THF, rt, 12 h, 100%; (c) 1% HCl in EtOH, rt, 2 h, 97%.

**Step 1: rac-(3-Chlorophenyl)[5-(1,3-dioxolan-2-yl)-2-methyl-3-thienyl]methanol (I-74).** A 100mL 2-neck round bottom flask was charged with THF (60 mL) then the flask was purged with argon, and was cooled at -78 °C. To the THF, 2.50 M of *n*-BuLi in hexane (5.40 mL, 13.5 mmol) was added dropwise via syringe and the mixture was stirred for 10 min at -78 °C. 2-(4-bromo-5-methyl-2-thienyl)-1,3-dioxolane (2.69 g, 10.8 mmol) was added dropwise at -78 °C. The solution was stirred for 30 min at -78 °C. 3-chlorobenzaldehyde (1.23 mL, 10.8 mmol) was

added to the solution at once at -78 °C and stirred for 15 min. The reaction was quenched by addition of saturated NH<sub>4</sub>Cl (50 mL) and extracted with EtOAc (50 mL) three times. The combined organic layers were dried over Na<sub>2</sub>SO<sub>4</sub>, filtered, and concentrated in vacuo. The residue was purified on silica gel to yield **I-74** (2.3 g, 68%). <sup>1</sup>H NMR (CDCl<sub>3</sub>) δ 7.14–7.06 (m, 4H), 6.79 (s, 1H), 5.81 (s, 1H), 5.70 (s, 1H), 4.00–3.91 (m, 3H), 3.88–3.77 (m, 2H), 2.32 (s, 3H).

**Step 2: rac-{(3-Chlorophenyl)[5-(1,3-dioxolan-2-yl)-2-methyl-3-thienyl]methoxy}(triisopropyl)silane (I-75).** rac-(3-Chlorophenyl)[5-(1,3-dioxolan-2-yl)-2-methyl-3-thienyl]methanol (927 mg, 2.98 mmol) was dissolved in THF (30.6 mL), then 60% NaH in mineral oil (329 mg, 13.7 mmol) was added to this solution. The solution was stirred at 40 °C for 30 min. TIPSCl (1.45 mL, 6.86 mmol) was added and the reaction mixture stirred at rt overnight. The solution was poured into 30 mL saturated NH<sub>4</sub>Cl solution. The solution was extracted with EtOAc (30 mL) twice. The combined organic layers were dried over Na<sub>2</sub>SO<sub>4</sub>, filtered, concentrated in vacuo. The residue was purified on silica gel to provide **I-75** (1.39 g, 100%). <sup>1</sup>H NMR (CDCl<sub>3</sub>) δ 7.17–7.02 (m, 4H), 6.96 (s, 1H), 5.87 (s, 1H), 5.72 (s, 1H), 4.00–3.94 (m, 2H), 3.90–3.85 (m, 2H), 2.33 (s, 3H), 1.00–0.93 (m, 21H). LCMS (FA): *m/z* = 467.1 (M+H).

**Step 3: rac-4-{(3-Chlorophenyl)[(triisopropylsilyloxy)methyl]-5-methylthiophene-2-carbaldehyde (I-76).** rac-{(3-Chlorophenyl)[5-(1,3-dioxolan-2-yl)-2-methyl-3-thienyl]methoxy}(triisopropyl)silane (1.6 g, 3.4 mmol) was dissolved in 1% HCl in EtOH (20 mL) and the reaction was stirred at rt for 2 h. The reaction mixture was diluted with water, extracted with DCM (20 mL) twice. The combined organic layers were dried over Na<sub>2</sub>SO<sub>4</sub>, filtered, concentrated in vacuo. The residue was purified on silica gel to give **I-76** (1.4 g, 97%). <sup>1</sup>H NMR (CDCl<sub>3</sub>) δ 9.67 (s, 1H), 7.63 (s, 1H), 7.21–7.03 (m, 4H), 5.75 (s, 1H), 2.40 (s, 3H), 1.06–0.92 (m, 21H). LCMS (FA): *m/z* = 423.1 (M+H).

## Synthesis of 39

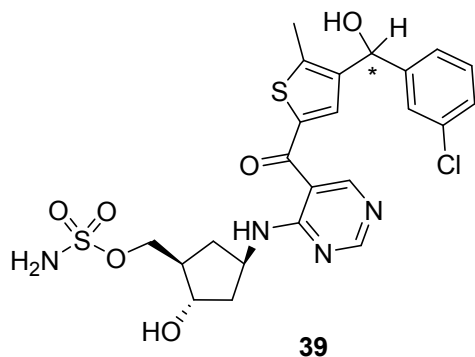

[(1*R*,2*S*,4*R*)-4-{[5-({4-[(*R*)-(3-Chlorophenyl)(hydroxy)methyl]-5-methyl-2-thienyl}carbonyl)pyrimidin-4-yl]amino}-2-hydroxycyclopentyl]methyl sulfamate or [(1*R*,2*S*,4*R*)-4-{[5-({4-[(*S*)-(3-Chlorophenyl)(hydroxy)methyl]-5-methyl-2-thienyl}carbonyl)pyrimidin-4-yl]amino}-2-hydroxycyclopentyl]methyl sulfamate (**39**).



Prepared by the method described for the preparation of **26** using 4-chloro-5-iodopyrimidine and intermediate **I-76** in Step 2. The following alternative conditions were employed in the reaction scheme: Step 3: oxidant used was MnO<sub>2</sub>; Step 4: Base/solvent used was *N,N*-diisopropylethylamine/*i*-PrOH; Step 7: desilylating agent/solvent used was TBAF/THF. The individual diastereomers were obtained using preparative scale chiral SFC. More active epimer **39** is reported. <sup>1</sup>H NMR (MeOD) δ 8.66 (s, 1H), 8.56 (d, 1H, *J* = 4.3 Hz), 7.47 (s, 1H), 7.41 (s, 1H), 7.37–7.20 (m, 3H), 5.89 (s, 1H), 4.81–4.73 (m, 1H), 4.23–4.09 (m, 3H), 2.53 (s, 3H), 2.51–2.42 (m, 1H), 2.30–2.22 (m, 1H), 2.18–2.10 (m, 1H), 1.93–1.85 (m, 1H), 1.44–1.37 (m, 1H). LCMS (FA): *m/z* = 553.1 (M+H). HRMS *m/z* [M+H]<sup>+</sup> calcd for C<sub>23</sub>H<sub>26</sub>ClN<sub>4</sub>O<sub>6</sub>S<sub>2</sub> 553.0982, obsd 553.0981.

## Synthesis of 40

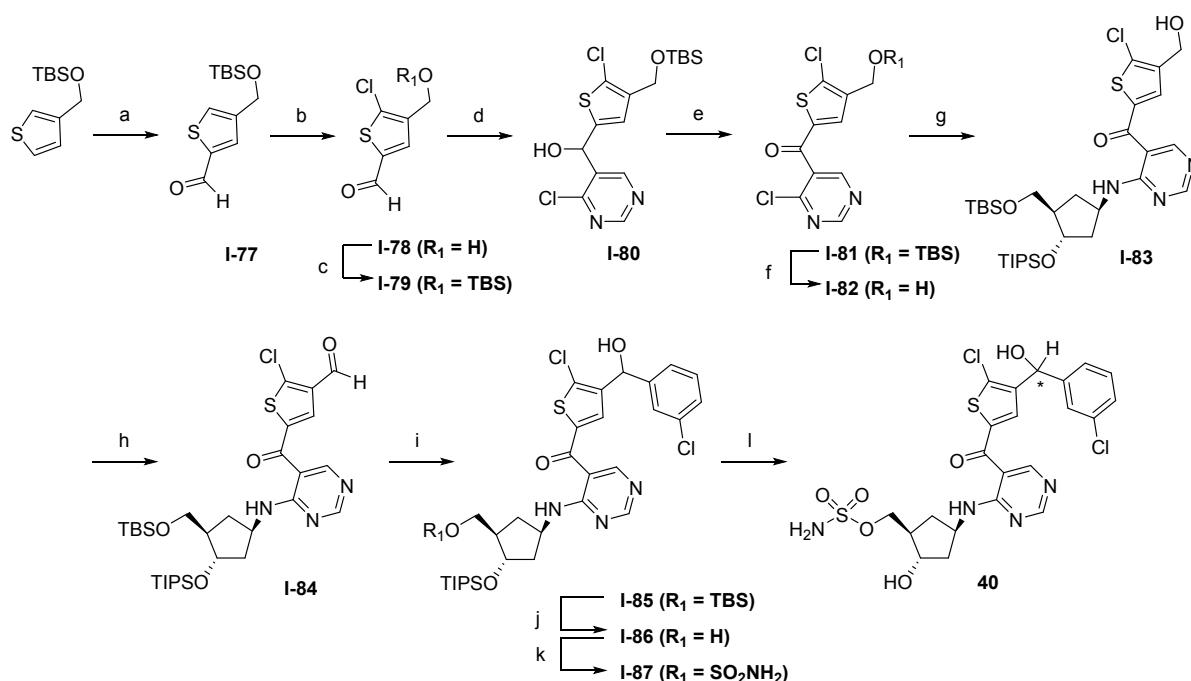

Reagents: (a) *n*-BuLi, DMF, THF, -78 °C then rt 30 min; (b) NCS, DMF, 50 °C, 3 h; (c) TBSCl, imidazole, DCM, rt, 1 h, 86% for 2 steps; (d) 4-chloro-5-iodo-pyrimidine, *n*-BuLi, THF, -78 °C, 15 min, 84%; (e) MnO<sub>2</sub>, DCM, rt, 12 h, 85%; (f) 2N HCl, THF, rt, h, 79%; (g) **I-31**, DIPEA, *i*-PrOH, 70 °C, 2 h, 92%; (h) Dess-Martin periodinane, DCM, 0 °C, 0.5 h, %; (i) 3-chlorophenylmagnesium bromide, THF, 0 °C, 1 h, 50%; (j) 1% HCl in EtOH, EtOH, 4 °C, 12 h, 96%; (k) chlorosulfonamide, DMF, rt, 1 h, 94%; (l) H<sub>3</sub>PO<sub>4</sub>, CH<sub>3</sub>CN, rt, 1 h, 39%.

### Step 1: 4-({*tert*-Butyl(dimethyl)silyl}oxy)methylthiophene-2-carbaldehyde (**I-77**). A

solution of *tert*-butyl(dimethyl)(3-thienylmethoxy)silane (8.78 g, 38.4 mmol) in THF (140 mL) was cooled at -78 °C. 1.40 M of *sec*-BuLi in cyclohexane (35.7 mL, 50.0 mmol) was added dropwise via syringe to the solution at -78 °C and the mixture was stirred for 30 seconds. DMF (5.95 mL, 76.9 mmol) was added at -78 °C, and the reaction mixture was allowed to warm to rt over 30 min. Reaction was quenched with acetic acid (5 mL), and the solution was poured into 60 mL of water and extracted with EtOAc (100 mL) twice. The combined organic layers were concentrated in vacuo and the mixture was purified on silica gel to afford **I-77** as a colorless oil (6.91 g, 70%). <sup>1</sup>H NMR (400 MHz, CDCl<sub>3</sub>) δ 9.79 (d, 1H, *J* = 1.3 Hz), 7.58 (d, 1H, *J* = 1.4 Hz), 7.47 (d, 1H, *J* = 1.2 Hz), 4.70 – 4.54 (s, 2H), 0.83 (s, 9H), -0.00 (s, 6H).

**Step 2: 5-Chloro-4-(hydroxymethyl)thiophene-2-carbaldehyde (I-78).** To a solution of 4-({*tert*-butyl(dimethyl)silyl}oxy)methylthiophene-2-carbaldehyde (1.75 g, 6.82 mmol) in DMF (30 mL) was added NCS (1.88 g, 14.1 mmol) in one portion. The reaction mixture was then stirred at 50 °C for 3 h. The reaction mixture was allowed to cool to rt. The reaction was diluted with 50 mL water and extracted with EtOAc twice. The combined EtOAc layer was washed with brine, dried under Na<sub>2</sub>SO<sub>4</sub>, filtered and concentrated under reduced pressure to give **I-78** as colorless oil. <sup>1</sup>H NMR (CDCl<sub>3</sub>) δ 9.76 (s, 1H), 7.74 (s, 1H), 4.65 (s, 2H), 3.41–3.18 (br s, 1H). LCMS (FA): *m/z* = 176.9 (M+H).

**Step 3: 4-({*tert*-Butyl(dimethyl)silyl}oxy)methyl-5-chlorothiophene-2-carbaldehyde (I-79).** To a solution of 5-chloro-4-(hydroxymethyl)thiophene-2-carbaldehyde in DCM (30 mL), TBSCl (1.23 g, 8.19 mmol) and imidazole (0.93 g, 13.6 mmol) were added and the reaction was stirred at rt for 1 h. The reaction mixture was quenched by addition of water (60 mL) and extracted with DCM (50 mL) three times. The combined organic layers were washed by brine, dried by Na<sub>2</sub>SO<sub>4</sub>, filtered and concentrated in vacuo. The residue was purified on silica gel to afford **I-79** as a colorless oil (1.7 g, 86%). <sup>1</sup>H NMR (CDCl<sub>3</sub>) δ 9.78 (s, 1H), 7.66 (s, 1H), 4.65 (m, 2H), 0.92 (s, 9H), 0.08 (s, 6H). LCMS (FA): *m/z* = 291.3 (M+H).

**Step 4: [4-({*tert*-Butyl(dimethyl)silyl}oxy)methyl]-5-chloro-2-thienyl[4-chloropyrimidin-5-yl]methanol (I-80).** A solution of 4-chloro-5-iodopyrimidine (1.2 g, 5.0 mmol) in THF (37.3 mL) was cooled at -78 °C. To the solution was added dropwise 2.50 M of *n*-BuLi in hexane (3.96 mL, 9.90 mmol) at -78 °C and the mixture was stirred for 30 min at same temp. To the mixture was added dropwise a solution of 4-({*tert*-butyl(dimethyl)silyl}oxy)methyl-5-chlorothiophene-2-carbaldehyde (1.2 g, 4.1 mmol) in THF (7.5 mL) at -78 °C, and the reaction was stirred for 15 min. The reaction was quenched by addition of saturated NH<sub>4</sub>Cl (150 mL) and extracted with EtOAc (50 mL) three times. The combined organic layers were dried over Na<sub>2</sub>SO<sub>4</sub>, filtered, and concentrated in vacuo. The residue was purified on silica gel to give **I-80** as light yellow oil (1.4 g, 84%). <sup>1</sup>H NMR (CDCl<sub>3</sub>) δ 8.97 (s, 1H), 8.91 (s, 1H), 6.88 (s, 1H), 6.21 (s, 1H), 4.56 (s, 2H), 3.48–3.09 (br s, 1H), 0.87 (s, 9H), 0.06 (s, 6H). LCMS (FA): *m/z* = 405.2 (M+H).

**Step 5: [4-({*tert*-Butyl(dimethyl)silyl}oxy)methyl]-5-chloro-2-thienyl[4-chloropyrimidin-5-yl]methanone (I-81).** To a solution of [4-({*tert*-butyl(dimethyl)silyl}oxy)methyl]-5-chloro-2-thienyl[4-chloropyrimidin-5-yl]methanol (1.88 g, 4.64 mmol) in DCM (97 mL) was added MnO<sub>2</sub> (4.03 g, 46.4 mmol) at rt, and the mixture was stirred for 12 h. The reaction was filtered through a celite pad and the residual solid was rinsed with DCM several times. The filtrate was concentrated in vacuo to give **I-81** as light yellow oil (1.59 g, 85%). <sup>1</sup>H NMR (CDCl<sub>3</sub>) δ 9.13 (s, 1H), 8.75 (s, 1H), 7.32 (s, 1H), 4.65–4.58 (m, 2H), 0.86 (s, 9H), 0.07 (s, 6H). LCMS (FA): *m/z* = 403.3 (M+H).

**Step 6: [5-Chloro-4-(hydroxymethyl)-2-thienyl][4-chloropyrimidin-5-yl]methanone (I-82).** In a 100 mL round bottom flask, was placed [4-({*tert*-butyl(dimethyl)silyl}oxy)methyl]-5-chloro-2-thienyl[4-chloropyrimidin-5-yl]methanone (2.07 g, 5.13 mmol), THF (24.0 mL) and 2.0 M of HCl in water (4.00 mL, 8.00 mmol). The reaction was stirred at rt. The reaction was quenched with saturated NaHCO<sub>3</sub> and the aqueous layer was extracted with EtOAc three times.

The combined organics were dried over Na<sub>2</sub>SO<sub>4</sub>, filtered and concentrated in vacuo. The residue was purified on silica gel to afford **I-82** a yellow solid (1.17 g, 79%). <sup>1</sup>H NMR (CDCl<sub>3</sub>) δ 9.14 (s, 1H), 8.76 (s, 1H), 7.38 (s, 1H), 4.67 (s, 2H), 1.87 (br s, 1H). LCMS (FA): *m/z* = 291.1 (M+H).

**Step 7: [4-((1*R*,3*R*,4*S*)-3-([*tert*-Butyl(dimethyl)silyl]oxy)methyl)-4-[(triisopropylsilyl)oxy]cyclopentyl)amino)pyrimidin-5-yl][5-chloro-4-(hydroxymethyl)-2-thienyl]methanone (I-83).** In a microwave reaction vessel, to a solution of (1*R*,3*R*,4*S*)-3-([*tert*-butyl(dimethyl)silyl]oxy)methyl)-4-[(triisopropylsilyl)oxy]cyclopentanamine (**I-31**, 764 mg, 1.90 mmol) and [5-chloro-4-(hydroxymethyl)-2-thienyl](4-chloropyrimidin-5-yl)methanone (500 mg, 1.73 mmol) in 1-PrOH (14.0 mL) was added *N,N*-diisopropylethylamine (1.00 mL, 5.74 mmol). The reaction vessel was purged with argon and then sealed. The mixture was stirred for 2 h at 70 °C, then concentrated in vacuo. To the residue was added EtOAc. The organic layer was washed with saturated NH<sub>4</sub>Cl twice followed by water and brine. The resulting organic portion was dried over Na<sub>2</sub>SO<sub>4</sub>, filtered, and concentrated in vacuo. The residue was purified on silica gel to provide **I-83** as a yellow residue (1.04 g, 92%). <sup>1</sup>H NMR (CDCl<sub>3</sub>) δ 8.80 (s, 1H), 8.66 (s, 1H), 8.51 (d, 1H, *J* = 7.1 Hz), 7.54 (s, 1H), 4.86–4.73 (m, 1H), 4.68 (s, 2H), 4.34–4.26 (m, 1H), 3.65–3.51 (m, 2H), 2.49–2.39 (m, 1H), 2.23–2.09 (m, 2H), 1.92 (s, 1H), 1.77–1.65 (m, 1H), 1.32–1.19 (m, 1H), 1.07 (s, 21H), 0.89 (s, 9H), 0.04 (s, 6H). LCMS (FA): *m/z* = 654.7 (M+H).

**Step 8: 5-{[4-((1*R*,3*R*,4*S*)-3-([*tert*-Butyl(dimethyl)silyl]oxy)methyl)-4-[(triisopropylsilyl)oxy]cyclopentyl)amino)pyrimidin-5-yl]carbonyl}-2-chlorothiophene-3-carbaldehyde (I-84).** A 50 mL round bottom flask under nitrogen was charged with [4-((1*R*,3*R*,4*S*)-3-([*tert*-butyl(dimethyl)silyl]oxy)methyl)-4-[(triisopropylsilyl)oxy]cyclopentyl)amino)pyrimidin-5-yl][5-chloro-4-(hydroxymethyl)-2-thienyl]methanone (0.57 g, 0.87 mmol) and DCM (10 mL). To the mixture was added Dess-Martin periodinane (0.55 g, 1.31 mmol) in a single portion and the mixture was stirred with cooling at 0 °C for 30 min. The reaction mixture was quenched by addition of saturated NaHCO<sub>3</sub> followed by extraction with DCM. The organic portion was dried with Na<sub>2</sub>SO<sub>4</sub>, filtered and concentrated in vacuo. The residue was purified by silica gel to give **I-84** as a yellow residue (0.51 g, 90%). <sup>1</sup>H NMR (CDCl<sub>3</sub>) δ 10.04 (s, 1H), 8.81 (s, 1H), 8.69 (s, 1H), 8.55 (d, 1H, *J* = 7.1 Hz), 7.79 (s, 1H), 4.88–4.76 (m, 1H), 4.34–4.27 (m, 1H), 3.66–3.53 (m, 2H), 2.51–2.39 (m, 1H), 2.24–2.09 (m, 2H), 1.78–1.66 (m, 1H), 1.34–1.21 (m, 1H), 1.07 (s, 21H), 0.89 (s, 9H), 0.04 (s, 6H). LCMS (FA): *m/z* = 652.7 (M+H).

**Step 9: [[4-((1*R*,3*R*,4*S*)-3-([*tert*-Butyl(dimethyl)silyl]oxy)methyl)-4-[(triisopropylsilyl)oxy]cyclopentyl)amino)pyrimidin-5-yl][5-chloro-4-[(*S*)-(3-chlorophenyl)(hydroxy)methyl]-2-thienyl]methanone and [[4-((1*R*,3*R*,4*S*)-3-([*tert*-Butyl(dimethyl)silyl]oxy)methyl)-4-[(triisopropylsilyl)oxy]cyclopentyl)amino)pyrimidin-5-yl][5-chloro-4-[(*R*)-(3-chlorophenyl)(hydroxy)methyl]-2-thienyl]methanone (I-85).** To a solution of 5-{[4-((1*R*,3*R*,4*S*)-3-([*tert*-butyl(dimethyl)silyl]oxy)methyl)-4-[(triisopropylsilyl)oxy]cyclopentyl)amino)pyrimidin-5-yl]carbonyl}-2-chlorothiophene-3-carbaldehyde (373 mg, 0.57 mmol) in THF (5.34 mL) was added 0.5 M of 3-chlorophenylmagnesium bromide in THF (2.29 mL, 1.14 mmol) at 0 °C, and the mixture was then stirred at 0 °C for 1 h. To the reaction was added more 0.5 M of 3-chlorophenylmagnesium bromide in THF (1.5 mL) and the mixture was stirred for 1 h. The reaction was quenched by

addition of saturated  $\text{NH}_4\text{Cl}$  and the mixture was extracted with EtOAc three times. The combined organic layers were then washed with water, brine, dried over  $\text{Na}_2\text{SO}_4$ , filtered and concentrated in vacuo to give **I-85** (220 mg, 50%).  $^1\text{H}$  NMR ( $\text{CDCl}_3$ )  $\delta$  8.69 (s, 1H), 8.63 (s, 1H), 8.54–8.48 (br d, 1H,  $J=7.3$  Hz), 7.48 (d, 1H,  $J=0.9$  Hz), 7.41 (s, 1H), 7.31–7.26 (m, 3H), 5.98 (s, 1H), 4.85–4.74 (m, 1H), 4.33–4.27 (m, 1H), 3.62 (ddd, 1H,  $J=10.0, 5.4, 2.6$  Hz), 3.55 (ddd, 1H,  $J=10.0, 5.8, 2.2$  Hz), 3.16–3.09 (br s, 1H), 2.48–2.38 (m, 1H), 2.22–2.10 (m, 2H), 1.76–1.65 (m, 1H), 1.30–1.20 (m, 1H), 1.07 (m, 21H), 0.89 and 0.88 (each s, total 9H), 0.05 (s, 3H), 0.04 (s, 3H). LCMS (FA):  $m/z = 766.3$  (M+H).

**Step 10: {5-Chloro-4-[(S)-(3-chlorophenyl)(hydroxy)methyl]-2-thienyl}[4-((1R,3R,4S)-3-(hydroxymethyl)-4-[(triisopropylsilyl)oxy]cyclopentyl)amino]pyrimidin-5-yl}methanone and {5-Chloro-4-[(R)-(3-chlorophenyl)(hydroxy)methyl]-2-thienyl}[4-((1R,3R,4S)-3-(hydroxymethyl)-4-[(triisopropylsilyl)oxy]cyclopentyl)amino]pyrimidin-5-yl}methanone (I-86).** To a solution of [[4-((1R,3R,4S)-3-([*tert*-butyl(dimethyl)silyl]oxy)methyl)-4-[(triisopropylsilyl)oxy]cyclopentyl)amino]pyrimidin-5-yl]{5-chloro-4-[(S)-(3-chlorophenyl)(hydroxy)methyl]-2-thienyl}methanone and [[4-((1R,3R,4S)-3-([*tert*-butyl(dimethyl)silyl]oxy)methyl)-4-[(triisopropylsilyl)oxy]cyclopentyl)amino]pyrimidin-5-yl]{5-chloro-4-[(R)-(3-chlorophenyl)(hydroxy)methyl]-2-thienyl}methanone (122 mg, 0.16 mmol) in EtOH (1 mL) was added 1% HCl in EtOH solution (4.6 mL, 0.56 mmol) at 0 °C, and the reaction was stirred for 1 h at 0 °C then kept in the refrigerator for overnight. The reaction was quenched by addition of saturated  $\text{NaHCO}_3$ , and the mixture was concentrated in vacuo. To the residue was added water and extracted with EtOAc three times. The combined organic layers were dried over  $\text{Na}_2\text{SO}_4$ , filtered, and concentrated in vacuo to give **I-86** (100 mg, 96%). LCMS (FA):  $m/z = 652.1$  (M+H).

**Step 11: {(1R,2S,4R)-4-{[5-({5-Chloro-4-[(S)-(3-chlorophenyl)(hydroxy)methyl]-2-thienyl}carbonyl)pyrimidin-4-yl]amino}-2-[(triisopropylsilyl)oxy]cyclopentyl}methyl sulfamate and {(1R,2S,4R)-4-{[5-({5-Chloro-4-[(R)-(3-chlorophenyl)(hydroxy)methyl]-2-thienyl}carbonyl)pyrimidin-4-yl]amino}-2-[(triisopropylsilyl)oxy]cyclopentyl}methyl sulfamate (I-87).** To a solution of the products from step 9 (114 mg, 0.18 mmol) in DMF (0.8 mL) was added chlorosulfonamide (40.5 mg, 0.35 mmol) at rt, and the mixture was stirred for 1 h. The reaction was quenched by addition of saturated  $\text{NaHCO}_3$  and the mixture was extracted with EtOAc twice. The combined organic layers were dried over  $\text{Na}_2\text{SO}_4$ , filtered, and concentrated in vacuo to give **I-87** (120 mg, 94%). LCMS (FA):  $m/z = 731.2$  (M+H).

**Step 12: [(1R,2S,4R)-4-{[5-({5-Chloro-4-[(S)-(3-chlorophenyl)(hydroxy)methyl]-2-thienyl}carbonyl)pyrimidin-4-yl]amino}-2-hydroxycyclopentyl]methyl sulfamate or [(1R,2S,4R)-4-{[5-({5-Chloro-4-[(R)-(3-chlorophenyl)(hydroxy)methyl]-2-thienyl}carbonyl)pyrimidin-4-yl]amino}-2-hydroxycyclopentyl]methyl sulfamate (40).** To a solution of the products from step 10 (125 mg, 0.17 mmol) in  $\text{CH}_3\text{CN}$  (1 mL) was added  $\text{H}_3\text{PO}_4$  (1 mL) at 0°C and the reaction was stirred at rt for 1 h. The reaction was quenched by addition of 1M  $\text{Na}_2\text{CO}_3$  and the mixture was extracted with EtOAc three times. The combined organic layers were dried over  $\text{Na}_2\text{SO}_4$ , filtered, and concentrated in vacuo. The residue was purified by preparative HPLC to give 33 mg (39%) of the title compound as a mixture of diastereomers. The individual diastereomers were obtained using preparative scale chiral HPLC. More active epimer **40** is reported.  $^1\text{H}$  NMR ( $\text{MeOD}$ )  $\delta$  8.64 (s, 1H), 8.55 (s, 1H), 7.51 (s, 1H),

7.40 (s, 1H), 7.29 (d, 2H,  $J = 6.7$  Hz), 7.25 (dd, 1H,  $J = 5.7, 3.3$  Hz), 5.88 (s, 1H), 4.80–4.74 (m, 1H), 4.19–4.09 (m, 3H), 2.50–2.42 (m, 1H), 2.26–2.19 (m, 1H), 2.14–2.06 (m, 1H), 1.88–1.82 (m, 1H), 1.43–1.34 (m, 1H). LCMS (FA):  $m/z = 573.1$  (M+H). HRMS  $m/z$  [M+H]<sup>+</sup> calcd for C<sub>22</sub>H<sub>23</sub>Cl<sub>2</sub>N<sub>4</sub>O<sub>6</sub>S<sub>2</sub> 573.0436, obsd 573.0440.

### Synthesis of Intermediate I-88

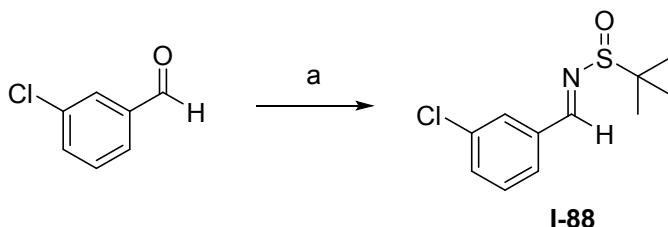

Reagents: (a) 2-methyl-2-propanesulfinamide, CuSO<sub>4</sub>, DCM, rt, 15 h, 66%.

#### Step 1: *N*-[(*E*)-(3-Chlorophenyl)methylene]-2-methylpropane-2-sulfinamide (I-88).

Copper(II) sulfate (2.9 g, 18.0 mmol) and 3-chlorobenzaldehyde (1.3 g, 9.1 mmol) were added to a solution of 2-methyl-2-propanesulfinamide (1.0 g, 8.2 mmol) in DCM (16 mL) at rt. The resulting suspension was allowed to stir for 15 h. The reaction mixture was filtered through a pad of celite and the filter cake was washed with DCM. The filtrate was concentrated and the crude mixture was purified on silica gel to afford **I-88** (1.32 g, 66%). <sup>1</sup>H NMR (CDCl<sub>3</sub>) δ 8.54 (s, 1H), 7.86 (t, 1H,  $J = 1.7$  Hz), 7.69 (dt, 1H,  $J = 7.5, 1.2$  Hz), 7.49 (ddd, 1H,  $J = 8.0, 2.0, 1.2$  Hz), 7.42 (t, 1H,  $J = 7.8$  Hz), 1.27 (s, 9H); LCMS (FA):  $m/z = 244.3$  (M+H).

### Synthesis of Intermediate I-90

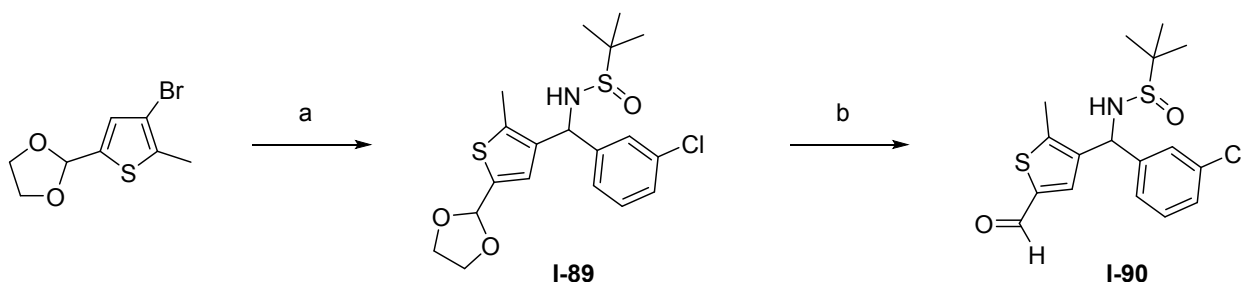

Reagents: (a) **I-88**, *n*-BuLi, THF, -78 °C, 0.5 h, 74%; (b) Dowex 50WX2, acetone, rt, 1 h, 96%.

**Step 1: rac-*N*-{(3-Chlorophenyl)[5-(1,3-dioxolan-2-yl)-2-methyl-3-thienyl]methyl}-2-methylpropane-2-sulfinamide (I-89).** A solution of 2-(4-bromo-5-methyl-2-thienyl)-1,3-dioxolane (3.1 g, 12.0 mmol) in THF (6 mL) was added dropwise to a solution of 2.50 M of *n*-BuLi in hexane (5.91 mL, 14.8 mmol) in THF (60 mL) at -78 °C. Immediately after addition was complete, *N*-[(*E*)-(3-chlorophenyl)methylene]-2-methylpropane-2-sulfinamide (**I-88**, 3.0 g, 12.0 mmol) was added dropwise as a solution in THF (6 mL). The resulting mixture was allowed to stir 30 min at -78 °C and then allowed to warm to near rt. The reaction was quenched with water and the resulting mixture was extracted with EtOAc twice. The combined organic layers were

dried over Na<sub>2</sub>SO<sub>4</sub>, filtered, and concentrated. The residue was purified by silica gel to afford **I-89** (3.8 g, 74%). <sup>1</sup>H NMR (CDCl<sub>3</sub>) δ 7.39 and 7.33 (each s, each 0.5H), 7.29–7.20 (m, 3H), 6.95 and 6.89 (each s, each 0.5H), 5.96 and 5.93 (each s, each 0.5H), 5.61 (d, 0.5H, *J* = 1.8 Hz), 5.60 (d, 0.5H, *J* = 2.7 Hz), 4.13–4.05 (m, 2H), 4.03–3.92 (m, 2H), 3.64 (d, 0.5H, *J* = 2.5 Hz), 3.49 (s, 0.5H), 2.49 and 2.47 (each s, each 1.5H), 1.25 and 1.24 (each s, each 4.5H).

**Step 2: rac-*N*-[(3-Chlorophenyl)(5-formyl-2-methyl-3-thienyl)methyl]-2-methylpropane-2-sulfonamide (I-90).** Dowex 50WX2-200 (H) (3.80 g) was added to a solution of rac-*N*-{(3-chlorophenyl)[5-(1,3-dioxolan-2-yl)-2-methyl-3-thienyl]methyl}-2-methylpropane-2-sulfonamide (3.80 g, 9.20 mmol) in acetone (80 mL) at rt. The reaction was allowed to stir for 1 h. The reaction was filtered to remove solid resin and the crude material was purified on silica gel to provide **I-90** (3.26 g, 96%). <sup>1</sup>H NMR (CDCl<sub>3</sub>) δ 9.79 and 9.77 (each s, each 0.5H), 7.65 and 7.57 (each s, each 0.5H), 7.42–7.39 (m, 0.5H), 7.37–7.34 (m, 0.5H), 7.34–7.25 (m, 3H), 5.67 and 5.66 (each s, each 0.5H), 3.75 (d, 0.5H, *J* = 2.2 Hz), 3.58 (d, 0.5H, *J* = 2.5 Hz), 2.59 and 2.58 (each s, each 1.5H), 1.29 and 1.29 (each s, each 4.5H).

## Synthesis of 41

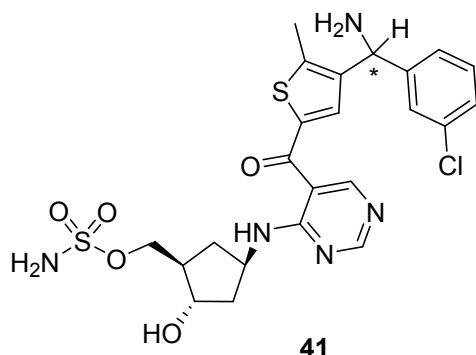

**[(1*R*,2*S*,4*R*)-4-{[5-({4-[(*R*)-Amino(3-chlorophenyl)methyl]-5-methyl-2-thienyl}carbonyl)pyrimidin-4-yl]amino}-2-hydroxycyclopentyl]methyl sulfamate or [(1*R*,2*S*,4*R*)-4-{[5-({4-[(*S*)-Amino(3-chlorophenyl)methyl]-5-methyl-2-thienyl}carbonyl)pyrimidin-4-yl]amino}-2-hydroxycyclopentyl]methyl sulfamate (**41**).**

Prepared by the method described for the preparation of **26** using 4-chloro-5-iodopyrimidine and intermediate **I-90** in Step 2. The following alternative conditions were employed in the reaction scheme: Step 3: oxidant used was MnO<sub>2</sub>; Step 4: Base/solvent used was *N,N*-diisopropylethylamine/*i*-PrOH. The individual diastereomers were obtained using preparative scale chiral SFC. More active epimer **41** is reported. <sup>1</sup>H NMR (DMSO-*d*<sub>6</sub>) δ 8.67 (s, 1H), 8.64 (s, 1H), 8.24 (d, 1H, *J* = 7.5 Hz), 7.75 (s, 1H), 7.49 (s, 1H), 7.43 (s, 2H), 7.36–7.20 (m, 3H), 5.13 (s, 1H), 4.89 (d, 1H, *J* = 4.5 Hz), 4.77–4.61 (m, 1H), 4.09 (dd, 1H, *J* = 9.8, 6.0 Hz), 4.01–3.88 (m, 2H), 2.45 (s, 3H), 2.38–2.25 (m, 1H), 2.16–2.04 (m, 1H), 2.03–1.85 (m, 1H), 1.84–1.71 (m, 1H), 1.34–1.18 (m, 1H). LCMS (FA): *m/z* = 552.2 (M+H). HRMS *m/z* [M+H]<sup>+</sup> calcd for C<sub>23</sub>H<sub>27</sub>ClN<sub>5</sub>O<sub>5</sub>S<sub>2</sub> 552.1142, obsd 552.1149.

## Synthesis of Intermediate I-94

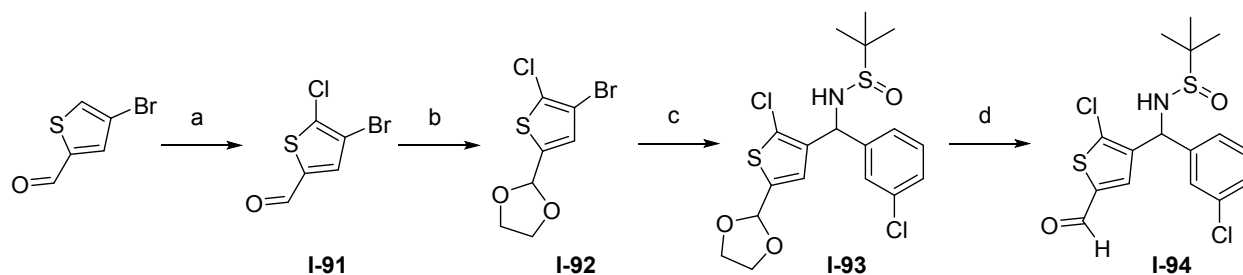

Reagents: (a) NCS, DMF, 50 °C, 12 h, 82%; (b) 1,2-ethanediol, *p*-TsOH, toluene, 110 °C, 12 h, 92%; (c) **I-88**, *n*-BuLi, THF, -78 °C, 15 min, 83%; (d) Dowex 50WX2, acetone, rt, 1 h, 93%.

**Step 1: 4-Bromo-5-chlorothiophene-2-carbaldehyde (I-91).** To a solution of 4-bromothiophene-2-carbaldehyde (20 g, 100 mmol) in DMF (49 mL, 630 mmol) was added NCS (21 g, 160 mmol), in portions. The reaction mixture was stirred at 50 °C overnight. The resulting solution was cooled to rt and then poured onto 500 mL of ice water (a light pink precipitate formed). The precipitate was collected via vacuum filtration and then dried in a vacuum oven to give **I-91** as a light tan solid (19.4 g, 82%). <sup>1</sup>H NMR (CDCl<sub>3</sub>) δ 9.79 (s, 1H), 7.62 (s, 1H).

**Step 2: 2-(4-Bromo-5-chloro-2-thienyl)-1,3-dioxolane (I-92).** To a solution of 4-bromo-5-chlorothiophene-2-carbaldehyde (19.4 g, 85.8 mmol) in toluene (300 mL) was added 1,2-ethanediol (23.9 mL, 429 mmol) and *p*-toluenesulfonic acid monohydrate (0.82 g, 4.29 mmol). The reaction mixture was fitted with a Dean-Stark trap, stirred at reflux overnight under argon gas. The reaction was quenched with water (300 mL), extracted with EtOAc (150 mL) three times, washed with brine, dried over MgSO<sub>4</sub>, filtered and concentrated to give ~28 g of crude product as a brown oil. The product was purified on silica gel to give **I-92** as an amber oil (21.3 g, 92%). <sup>1</sup>H NMR (CDCl<sub>3</sub>) δ 6.99 (d, 1H, *J* = 0.5 Hz), 6.02 (s, 1H), 4.15–4.07 (m, 2H), 4.07–3.99 (m, 2H).

**Step 3: rac-*N*-{[2-Chloro-5-(1,3-dioxolan-2-yl)-3-thienyl](3-chlorophenyl)methyl}-2-methylpropane-2-sulfinamide (I-93).** A solution of 2-(4-bromo-5-chloro-2-thienyl)-1,3-dioxolane (900 mg, 3.30 mmol) in THF (30 mL) was cooled to -78 °C and 2.50 M of *n*-BuLi in hexane (1.66 mL, 4.15 mmol) was added dropwise. Immediately after a solution of *N*-[(*E*)-(3-chlorophenyl)methylene]-2-methylpropane-2-sulfinamide (**I-88**, 0.97 g, 3.97 mmol) in THF (4 mL) was added quickly to the reaction mixture. The resulting solution was allowed to stir for 15 min at that temperature. After warming to ~0 °C, the reaction was quenched by addition of water. The mixture was extracted with EtOAc three times and the combined organic extracts were dried over Na<sub>2</sub>SO<sub>4</sub>, filtered and concentrated. The crude product was purified on silica gel to afford **I-93** (1.2 g, 83%). <sup>1</sup>H NMR (CDCl<sub>3</sub>) δ 7.41 (d, 1H, *J* = 17.9 Hz), 7.36–7.24 (m, 3H), 6.98 (d, 1H, *J* = 10.3 Hz), 5.97 (d, 1H, *J* = 6.8 Hz), 5.76 (dd, 1H, *J* = 7.5, 2.6 Hz), 4.15–4.07 (m, 2H), 4.06–3.96 (m, 2H), 3.69–3.61 (m, 1H), 1.33–1.22 (m, 9H).

**Step 4: rac-*N*-[(2-Chloro-5-formyl-3-thienyl)(3-chlorophenyl)methyl]-2-methylpropane-2-sulfinamide (I-94).** Dowex 50WX2-200 (H) (1 g) was added to a solution of *N*-{[2-chloro-5-(1,3-dioxolan-2-yl)-3-thienyl](3-chlorophenyl)methyl}-2-methylpropane-2-sulfinamide (0.90 g, 2.10 mmol) in acetone (20 mL) at rt. The reaction was allowed to stir for 1 h. The reaction was filtered to remove solid resin and the crude material was purified on silica gel to provide **I-94** (0.75 g, 93%). <sup>1</sup>H NMR (CDCl<sub>3</sub>) δ 9.75 (d, 1H, *J* = 4.0 Hz), 7.63 (d, 1H, *J* = 16.4 Hz), 7.38 (d,

1H,  $J = 12.8$  Hz), 7.34–7.27 (m, 3H), 5.78 (dd, 1H,  $J = 15.0, 3.1$  Hz), 3.80–3.70 (m, 1H), 1.27 (s, 9H).

## Synthesis of 42

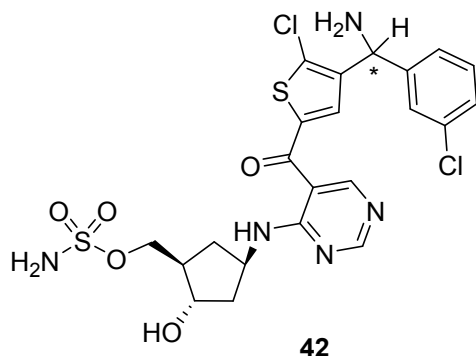

**[(1*R*,2*S*,4*R*)-4-{{5-({4-[(*R*)-Amino(3-chlorophenyl)methyl]-5-chloro-2-thienyl}carbonyl)pyrimidin-4-yl}amino}-2-hydroxycyclopentyl]methyl sulfamate or [(1*R*,2*S*,4*R*)-4-{{5-({4-[(*S*)-Amino(3-chlorophenyl)methyl]-5-chloro-2-thienyl}carbonyl)pyrimidin-4-yl}amino}-2-hydroxycyclopentyl]methyl sulfamate (**42**).**

Prepared by the method described for the preparation of **26** using 4-chloro-5-iodopyrimidine and intermediate **I-94** in Step 2. The following alternative conditions were employed in the reaction scheme: Step 3: oxidant used was  $\text{MnO}_2$ . The individual diastereomers were obtained using preparative scale chiral HPLC. More active epimer **42** is reported.  $^1\text{H}$  NMR ( $\text{DMSO-}d_6$ )  $\delta$  8.72 (s, 1H), 8.68 (s, 1H), 8.22 (d, 1H,  $J = 7.5$  Hz), 7.93 (s, 1H), 7.51 (s, 1H), 7.42 (s, 2H), 7.39–7.21 (m, 3H), 5.14 (s, 1H), 4.89 (d, 1H,  $J = 4.3$  Hz), 4.79–4.63 (m, 1H), 4.10 (dd, 1H,  $J = 9.7, 6.0$  Hz), 4.03–3.88 (m, 2H), 2.39–2.26 (m, 1H), 2.18–2.03 (m, 1H), 2.02–1.87 (m, 1H), 1.84–1.68 (m, 1H), 1.34–1.22 (m, 1H). LCMS (FA):  $m/z = 572.4$  ( $\text{M}+\text{H}$ ). HRMS  $m/z$  [ $\text{M}+\text{H}$ ] $^+$  calcd for  $\text{C}_{21}\text{H}_{23}\text{Cl}_2\text{N}_6\text{O}_5\text{S}_2$  572.0596, obsd 572.0599.

## Synthesis of Intermediate I-96

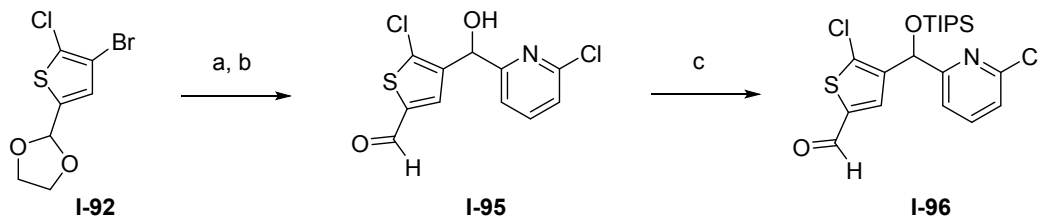

Reagents: (a) 6-chloropyridine-2-carbaldehyde,  $n\text{-BuLi}$ , THF,  $-78^\circ\text{C}$ , 1 h; (b) 1% HCl in EtOH, rt, 2 h; 61% for 2 steps; (c) TIPSCl, NaH, THF, rt, 12 h, 90%.



**Step 1: rac-5-Chloro-4-[(6-chloropyridin-2-yl)(hydroxy)methyl]thiophene-2-carbaldehyde (I-95).** 2-(4-Bromo-5-chloro-2-thienyl)-1,3-dioxolane (**I-92**, 854 mg, 3.17 mmol) was placed in a 50mL 2-neck round bottom flask under an atmosphere of argon. THF (30 mL) was added and the reaction was cooled at -78 °C. 2.50 M of *n*-BuLi in hexane (1.58 mL, 3.96 mmol) was added dropwise and the solution was stirred for 30 min. 6-Chloropyridine-2-carbaldehyde (449 mg, 3.17 mmol) was added in one portion and the reaction was stirred for 30 min at -78 °C. The reaction was quenched with saturated NH<sub>4</sub>Cl and the mixture was extracted with EtOAc. The combined organic layers were dried over MgSO<sub>4</sub>, filtered and concentrated in vacuo. The residue was purified on silica gel to give the desired protected intermediate. This was then dissolved into a 1% HCl/EtOH solution (50 mL) and allowed to stir at rt for 2 h. The reaction was neutralized with 1N NaOH and extracted with DCM (30 mL) twice. The combined organic layers were dried over Na<sub>2</sub>SO<sub>4</sub>, filtered, and concentrated in vacuo to afford **I-95** (0.55g, 61%). <sup>1</sup>H NMR (CDCl<sub>3</sub>) δ 9.73 (s, 1H), 7.68 (t, 1H, *J* = 7.8 Hz), 7.59 (s, 1H), 7.32 (d, 1H, *J* = 7.8 Hz), 7.17 (d, 1H, *J* = 7.5 Hz), 5.96 (s, 1H), 4.64 (brs, 1H).

**Step 2: rac-5-Chloro-4-[(6-chloropyridin-2-yl)((triisopropylsilyl)oxy)methyl]thiophene-2-carbaldehyde (I-96).** rac-5-Chloro-4-[(6-chloropyridin-2-yl)(hydroxy)methyl]thiophene-2-carbaldehyde (0.56 g, 1.95 mmol) was dissolved in THF (20.0 mL), then 60% NaH in mineral oil (0.14 g, 5.85 mmol) was added to this solution. The solution was stirred at 40 °C for 30 min. TIPSCl (0.62 mL, 2.93 mmol) was added and the reaction mixture stirred at rt overnight. The solution was poured into 30 mL saturated NH<sub>4</sub>Cl solution. The solution was extracted with EtOAc (30 mL) twice. The combined organic layers were dried over Na<sub>2</sub>SO<sub>4</sub>, filtered, concentrated in vacuo. The residue was purified on silica gel to give **I-96** (780 mg, 90%). <sup>1</sup>H NMR (CDCl<sub>3</sub>) δ 9.73 (s, 1H), 7.71–7.65 (m, 2H), 7.60 (d, 1H, *J* = 7.6 Hz), 7.22–7.17 (m, 1H), 6.03 (s, 1H), 1.20–1.08 (m, 3H), 1.02–0.96 (m, 18H).

## Synthesis of 43

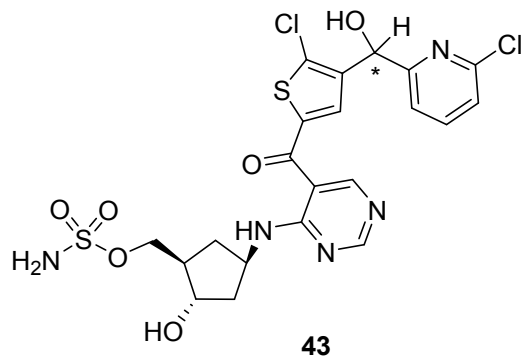

**[(1*R*,2*S*,4*R*)-4-{[5-({5-Chloro-4-[(*S*)-(6-chloropyridin-2-yl)(hydroxy)methyl]-2-thienyl}carbonyl)pyrimidin-4-yl]amino}-2-hydroxycyclopentyl]methyl sulfamate or [(1*R*,2*S*,4*R*)-4-{[5-({5-Chloro-4-[(*R*)-(6-chloropyridin-2-yl)(hydroxy)methyl]-2-thienyl}carbonyl)pyrimidin-4-yl]amino}-2-hydroxycyclopentyl]methyl sulfamate (**43**).** Prepared by the method described for the preparation of **26** using 4-chloro-5-iodopyrimidine and intermediate **I-96** in Step 2. The following alternative conditions were employed in the reaction

scheme: Step 3: oxidant used was  $\text{MnO}_2$ ; Step 4: Base/solvent used was  $N,N$ -diisopropylethylamine/ $i$ -PrOH; Step 7: desilylating agent/solvent used was TFA/water. The individual diastereomers were obtained using preparative scale chiral SFC. More active epimer **43** is reported.  $^1\text{H}$  NMR (MeOD)  $\delta$  8.72 (s, 1H), 8.64 (s, 1H), 7.84 (t, 1H,  $J = 7.8$  Hz), 7.62 (dd, 2H,  $J = 8.0, 3.6$  Hz), 7.35 (d, 1H,  $J = 7.9$  Hz), 5.93 (s, 1H), 4.86–4.70 (m, 1H), 4.28–4.10 (m, 3H), 2.57–2.41 (m, 1H), 2.21 (dd, 2H,  $J = 46.9, 5.5$  Hz), 1.92 (dt, 1H,  $J = 15.2, 7.0$  Hz), 1.53–1.35 (m, 1H). LCMS (FA):  $m/z = 574.0$  (M+H). HRMS  $m/z$   $[\text{M}+\text{H}]^+$  calcd for  $\text{C}_{21}\text{H}_{22}\text{Cl}_2\text{N}_5\text{O}_6\text{S}_2$  574.0389, obsd 574.0389.

### Synthesis of Intermediate I-97

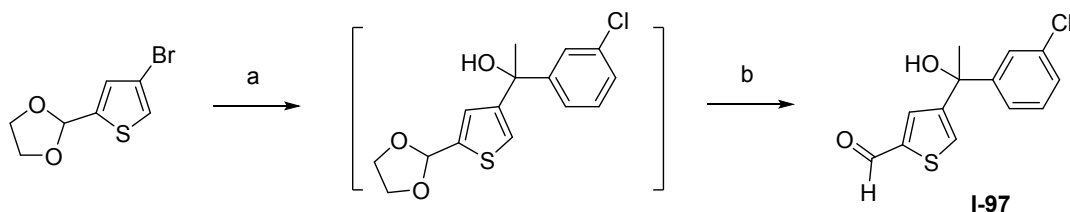

Reagents: (a) 3-chloroacetophenone,  $n$ -BuLi, THF,  $-78$  °C, 10 min; (b) Dowex 50WX2, acetone, rt, 2 h, 86% for 2 steps.

**Step 1: rac-4-[1-(3-Chlorophenyl)-1-hydroxyethyl]thiophene-2-carbaldehyde (I-97).** To a round bottom flask was added THF (100 mL) and 2.5 M  $n$ -BuLi in hexane (7.0 mL, 17.5 mmol) at  $-78$  °C. 2-(4-Bromothiophen-2-yl)-1,3-dioxolane (3.16 g, 13.4 mmol) in 5 mL THF was added and the mixture was stirred for 30 seconds. To the mixture was added 3-chloroacetophenone (1.82 mL, 14.1 mmol) and the reaction was stirred at  $-78$  °C for 10 min. The reaction was quenched by addition of saturated  $\text{NH}_4\text{Cl}$  and the reaction was warmed to rt. The mixture was extracted with EtOAc twice and the combined organic layers were washed with brine, dried under  $\text{MgSO}_4$ , filtered, and concentrated in vacuo. To the residue was added 40 mL of acetone and 3 g of Dowex 50WX2-200 ion-exchange resin and the mixture was stirred for 2 h at rt. The mixture was filtered and the filtrate was concentrated in vacuo. The residue was purified on silica gel to provide **I-97** (3.09 g, 86%).  $^1\text{H}$  NMR ( $\text{CDCl}_3$ )  $\delta$  9.80 (d, 1H,  $J = 1.2$  Hz), 7.62 (dt, 2H,  $J = 2.7, 1.5$  Hz), 7.47–7.44 (m, 1H), 7.30–7.23 (m, 3H), 2.68–2.30 (br s, 1H), 1.94 (s, 3H).

### Synthesis of 44

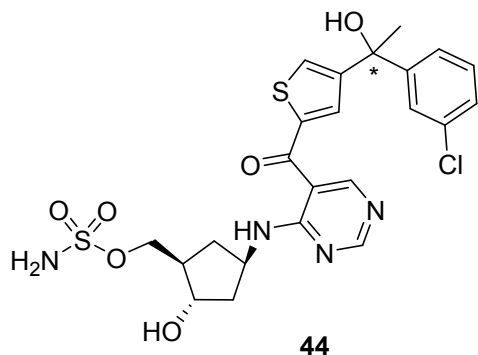

**[(1*R*,2*S*,4*R*)-4-{[5-({4-[(1*R*)-1-(3-Chlorophenyl)-1-hydroxyethyl]-2-thienyl}carbonyl)pyrimidin-4-yl]amino}-2-hydroxycyclopentyl]methyl sulfamate or [(1*R*,2*S*,4*R*)-4-{[5-({4-[(1*S*)-1-(3-Chlorophenyl)-1-hydroxyethyl]-2-thienyl}carbonyl)pyrimidin-4-yl]amino}-2-hydroxycyclopentyl]methyl sulfamate (**44**).**

Prepared by the method described for the preparation of **26** using 4-chloro-5-iodopyrimidine and intermediate **I-97** in Step 2. The following alternative conditions were employed in the reaction scheme: Step 3: oxidant used was MnO<sub>2</sub>; Step 4: Base/solvent used was *N,N*-diisopropylethylamine/*i*-PrOH; Step 7: desilylating agent/solvent used was TBAF/THF. The individual diastereomers were obtained using preparative scale chiral HPLC. More active epimer **44** is reported. <sup>1</sup>H NMR (MeOD) δ 8.65 (s, 1H), 8.55 (s, 1H), 7.80 (s, 1H), 7.59 (s, 1H), 7.52 (s, 1H), 7.36 (d, 1H, *J* = 7.8 Hz), 7.31 (t, 1H, *J* = 7.7 Hz), 7.25 (d, 1H, *J* = 7.7 Hz), 4.84–4.73 (m, 1H), 4.19 (tt, 3H, *J* = 15.8, 7.8 Hz), 2.55–2.42 (m, 1H), 2.27 (td, 1H, *J* = 14.3, 5.7 Hz), 2.21–2.11 (m, 1H), 1.98–1.87 (m, 4H), 1.46 (ddd, 1H, *J* = 14.5, 9.2, 4.5 Hz). LCMS (FA): *m/z* = 553.1 (M+H). HRMS *m/z* [M+H]<sup>+</sup> calcd for C<sub>23</sub>H<sub>26</sub>ClN<sub>4</sub>O<sub>6</sub>S<sub>2</sub> 553.0982, obsd 553.0994.

### Synthesis of Intermediate I-101

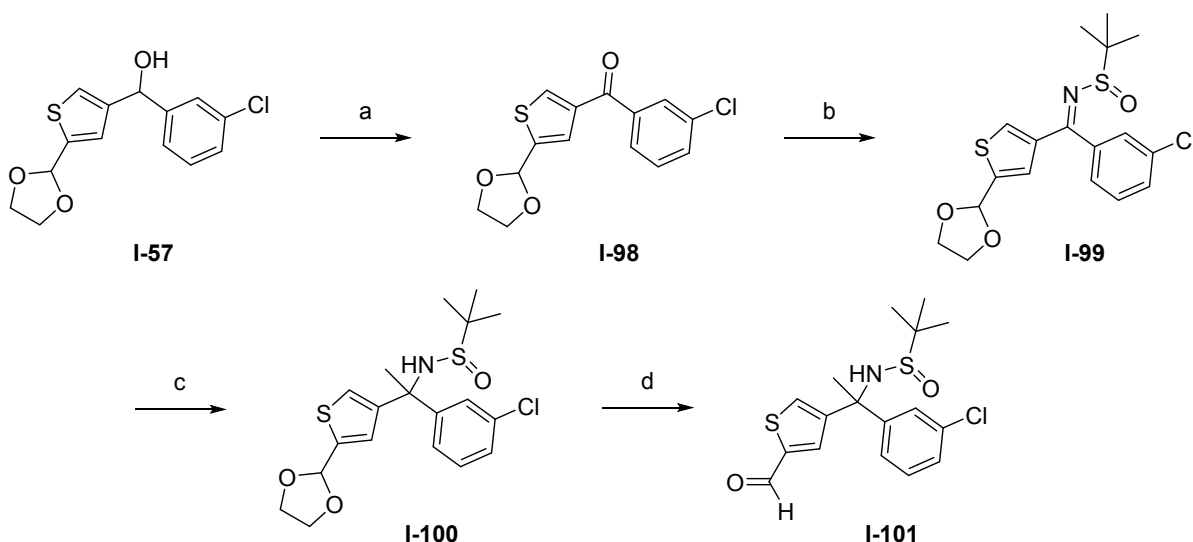

Reagents: (a) MnO<sub>2</sub>, DCM, rt, 14 h, 95%; (b) 2-methyl-2-propanesulfinamide, Ti(OEt)<sub>4</sub>, THF, 80 °C, 5 h, 91%; (c) MeLi, THF, -78 °C, 40 min, 96%; (d) Dowex 50WX2, acetone, rt, 1 h, 96%.

**Step 1: (3-Chlorophenyl)[5-(1,3-dioxolan-2-yl)-3-thienyl]methanone (I-98).** To a solution of **I-57** (1.8 g, 6.10 mmol) in DCM (54.5 mL) was added MnO<sub>2</sub> (5.80 g, 66.7 mmol). The mixture was stirred at rt for 14 h. The reaction was then filtered through a celite pad and the residual solid was washed with DCM several times. The filtrate was concentrated in vacuo to yield **I-98** (1.7 g, 95%). <sup>1</sup>H NMR (CDCl<sub>3</sub>) δ 7.93 (d, 1H, *J* = 1.4 Hz), 7.80 (t, 1H, *J* = 1.8 Hz), 7.70 (dt, 1H, *J* = 7.7, 1.3 Hz), 7.64–7.61 (m, 1H), 7.56 (ddd, 1H, *J* = 8.0, 2.1, 1.1 Hz), 7.43 (t, 1H, *J* = 7.8 Hz), 6.11 (s, 1H), 4.20–4.11 (m, 2H), 4.10–4.01 (m, 2H).

**Step 2: *N*-{(*E*)-(3-Chlorophenyl)[5-(1,3-dioxolan-2-yl)-3-thienyl]methylene}-2-methylpropane-2-sulfinamide (I-99).** (3-Chlorophenyl)[5-(1,3-dioxolan-2-yl)-3-

thienyl]methanone (1.70 g, 5.77 mmol) was added to a solution of  $\text{Ti}(\text{OEt})_4$  (5.30 g, 23.2 mmol) in THF (23 mL) under an atmosphere of argon. 2-methyl-2-propanesulfinamide (1.10 g, 9.08 mmol) was then added and the solution heated at 80 °C for 3 h. Additional 2-methyl-2-propanesulfinamide (0.46 g, 3.80 mmol) was added and the solution stirred at 80 °C for an additional 5 h. The reaction was allowed to cool to rt, and the mixture was poured into an equal volume of brine while rapidly stirring. The resulting suspension was filtered through a medium frit filter, and the filter cake was washed with EtOAc. The filtrate was transferred to a separatory funnel where the organic layer was washed with brine. The combined aqueous layers were extracted with EtOAc. The combined organic layers were dried over  $\text{MgSO}_4$ , filtered, and concentrated in vacuo. The crude product was purified on silica gel to afford **I-99** as a white solid (2.1 g, 91%).  $^1\text{H}$  NMR ( $\text{CDCl}_3$ )  $\delta$  7.63 (s, 1H), 7.55–7.28 (m, 5H), 6.09 (s, 1H), 4.20–4.09 (m, 2H), 4.09–4.00 (m, 2H), 1.28 (s, 9H).

**Step 3: rac-*N*-{1-(3-Chlorophenyl)-1-[5-(1,3-dioxolan-2-yl)-3-thienyl]ethyl}-2-methylpropane-2-sulfinamide (I-100).** 1.6 M of MeLi in ether (4.12 mL, 6.60 mmol) was added dropwise to a solution of *N*-{(*E*)-(3-chlorophenyl)[5-(1,3-dioxolan-2-yl)-3-thienyl]methylene}-2-methylpropane-2-sulfinamide (2.10 g, 5.28 mmol) in THF (20 mL) at -78 °C and the resulting solution allowed to stir for 40 min. After the reaction was warmed to 0 °C, the mixture was diluted with ether and quenched with water. The mixture was extracted with EtOAc three times and the combined organic layers were dried over  $\text{MgSO}_4$ , filtered, and concentrated in vacuo to yield 2.1 g (96%) of **I-100**.  $^1\text{H}$  NMR ( $\text{CDCl}_3$ )  $\delta$  7.40–7.37 (m, 1H), 7.28–7.22 (m, 3H), 7.20 (d, 1H,  $J$  = 1.6 Hz), 6.95 (d, 1H,  $J$  = 1.2 Hz), 6.00 (s, 1H), 4.13–4.08 (m, 2H), 4.02–3.96 (m, 2H), 3.74 (s, 1H), 2.06 (s, 3H), 1.23 (s, 9H).

**Step 4: rac-*N*-[1-(3-Chlorophenyl)-1-(5-formyl-3-thienyl)ethyl]-2-methylpropane-2-sulfinamide (I-101).** Dowex 50WX2-200 (H) (1.0 g) was added to a solution of rac-*N*-{1-(3-chlorophenyl)-1-[5-(1,3-dioxolan-2-yl)-3-thienyl]ethyl}-2-methylpropane-2-sulfinamide (2.10 g, 5.07 mmol) in acetone (39 mL) at rt. The reaction was allowed to stir for 1 h. The reaction was filtered to remove solid resin and the filtrate was concentrated in vacuo. The crude material was purified on silica gel to yield **I-101** (1.8 g, 96%).  $^1\text{H}$  NMR ( $\text{CDCl}_3$ )  $\delta$  9.87 (d, 1H,  $J$  = 1.2 Hz), 7.72 (t, 1H,  $J$  = 1.4 Hz), 7.62 (d, 1H,  $J$  = 1.6 Hz), 7.37–7.35 (m, 1H), 7.34–7.29 (m, 2H), 7.28–7.23 (m, 1H), 3.81 (s, 1H), 2.10 (s, 3H), 1.28 (s, 9H).

## Synthesis of 45

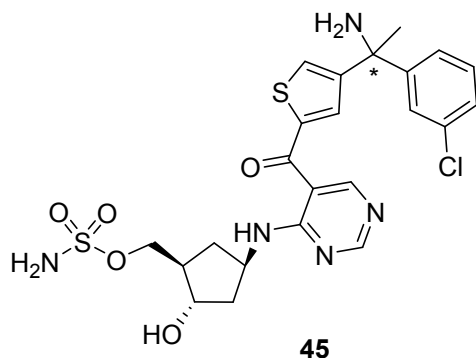

**[(1*R*,2*S*,4*R*)-4-{[5-({4-[(1*S*)-1-Amino-1-(3-chlorophenyl)ethyl]-2-thienyl}carbonyl)pyrimidin-4-yl]amino}-2-hydroxycyclopentyl]methyl sulfamate or [(1*R*,2*S*,4*R*)-4-{[5-({4-[(1*R*)-1-Amino-1-(3-chlorophenyl)ethyl]-2-thienyl}carbonyl)pyrimidin-4-yl]amino}-2-hydroxycyclopentyl]methyl sulfamate (**45**).**

Prepared by the method described for the preparation of **26** using 4-chloro-5-iodopyrimidine and intermediate **I-101** in Step 2. The following alternative conditions were employed in the reaction scheme: Step 3: oxidant used was MnO<sub>2</sub>. The individual diastereomers were obtained using preparative scale chiral HPLC. More active epimer **45** is reported. <sup>1</sup>H NMR (DMSO-*d*<sub>6</sub>) δ 8.63 (s, 1H), 8.63 (s, 1H), 8.28 (d, 1H, *J* = 7.5 Hz), 7.88 (s, 1H), 7.73 (s, 1H), 7.55 (s, 1H), 7.39–7.15 (m, 3H), 4.78–4.61 (m, 1H), 4.17–4.02 (m, 1H), 4.02–3.85 (m, 2H), 2.63 (s, 2H), 2.37–2.22 (m, 1H), 2.16–2.08 (m, 1H), 2.00–1.84 (m, 1H), 1.81–1.66 (m, 4H), 1.35–1.17 (m, 1H). LCMS (FA): *m/z* = 552.4 (M+H). HRMS *m/z* [M+H]<sup>+</sup> calcd for C<sub>23</sub>H<sub>27</sub>ClN<sub>5</sub>O<sub>5</sub>S<sub>2</sub> 552.1142, obsd 552.1148.

### Synthesis of Intermediate I-102

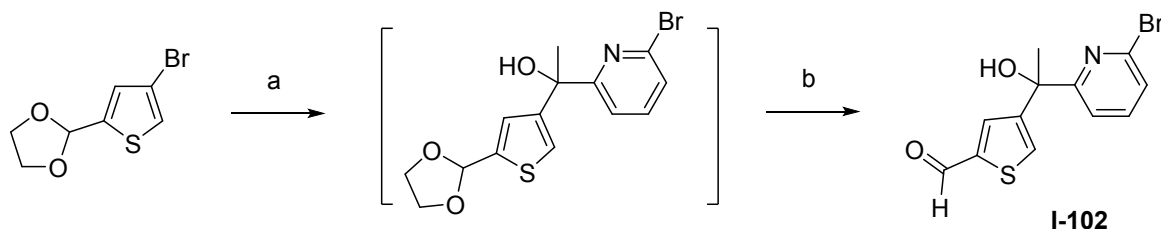

Reagents: (a) 2-acetyl-6-bromopyridine, *n*-BuLi, THF, -78 °C, 10 min; (b) Dowex 50WX2, acetone, rt, 2 h, 66% for 2 steps.

### Step 1: rac-4-[1-(6-Bromopyridin-2-yl)-1-hydroxyethyl]thiophene-2-carbaldehyde (**I-102**).

Prepared by the method described for the preparation of intermediate **I-97** using 2-(4-bromothiophen-2-yl)-1,3-dioxolane and 2-acetyl-6-bromopyridine in Step 1. <sup>1</sup>H NMR (CDCl<sub>3</sub>) δ 9.85 (d, 1H, *J* = 1.2 Hz), 7.73 (d, 1H, *J* = 1.5 Hz), 7.69 (t, 1H, *J* = 1.4 Hz), 7.56 (t, 1H, *J* = 7.8 Hz), 7.43 (dd, 1H, *J* = 7.8, 0.7 Hz), 7.28 (dd, 1H, *J* = 7.7, 0.7 Hz), 2.05–1.95 (br s, 1H), 1.92 (s, 3H).

### Synthesis of **46**

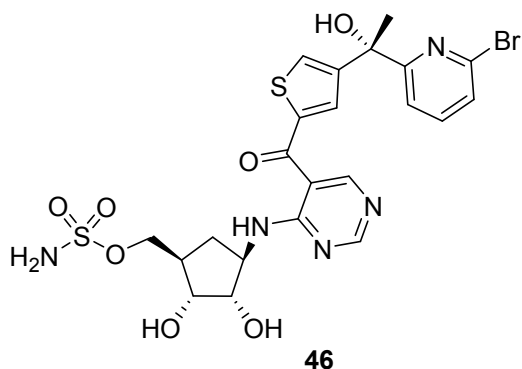

**[(1*R*,2*R*,3*S*,4*R*)-4-{[5-({4-[(1*S*)-1-(6-Bromopyridin-2-yl)-1-hydroxyethyl]-2-thienyl}carbonyl)pyrimidin-4-yl]amino}-2,3-dihydroxycyclopentyl]methyl sulfamate (46).** Prepared by the method described for the preparation of **1** using 4-chloro-5-iodopyrimidine and intermediate **I-102** in Step 2 of the synthesis of intermediate **I-3**. The individual diastereomers were obtained using preparative scale chiral SFC. More active epimer **46** is reported. <sup>1</sup>H NMR (MeOD) δ 8.75 (s, 1H), 8.61 (s, 1H), 7.86 (s, 1H), 7.74 (s, 2H), 7.67 (t, 1H, *J* = 7.7 Hz), 7.44 (dd, 1H, *J* = 7.7, 1.0 Hz), 4.59 (dd, 1H, *J* = 14.6, 8.4 Hz), 4.25–4.14 (m, 2H), 3.98–3.88 (m, 2H), 2.56–2.44 (m, 1H), 2.38 (d, 1H, *J* = 4.9 Hz), 1.97 (s, 3H), 1.36 (dt, 1H, *J* = 13.1, 8.7 Hz). LCMS (AA): *m/z* = 614.0 (M+H).

## Procedures for the syntheses of compounds in Table 7

### Synthesis of Intermediate I-107

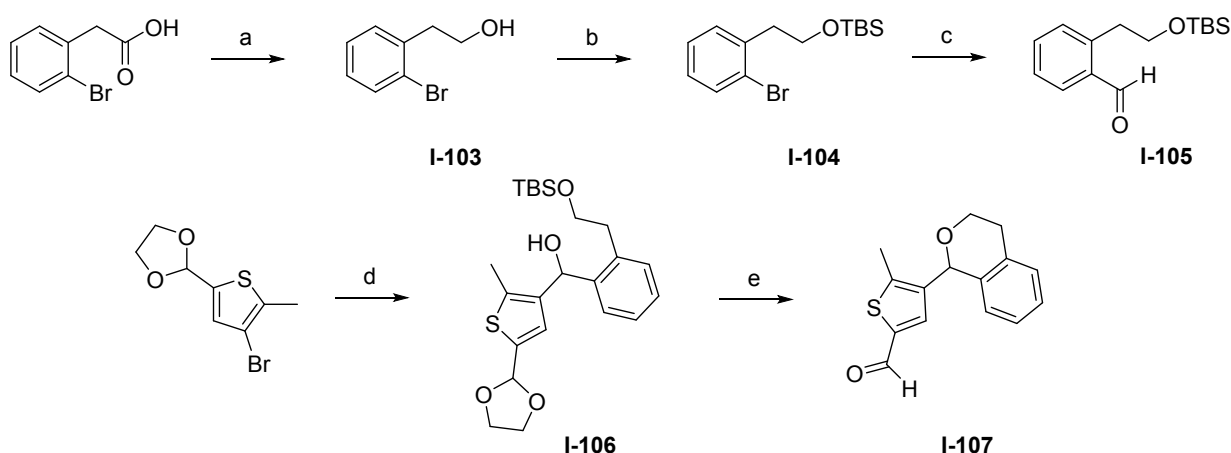

Reagents: (a) 1M BH<sub>3</sub> in THF, THF, rt to 60 °C, 12 h; (b) TBSCl, imidazole, DCM, rt, 2 h, 87% for 2 steps; (c) *n*-BuLi, DMF, THF, -78 °C, 10 min, 99%; (d) *n*-BuLi, **I-105**, THF, -78 °C, 10 min, 86%; (e) TFA, rt, 12 h, 89%.

**Step 1 and 2: (2-Bromophenethoxy)(*tert*-butyl)dimethylsilane (I-104).** To a solution of 2-(2-bromophenyl)acetic acid (21.5 g, 100 mmol) in THF (400 mL) was added slowly 1.0 M of borane in THF (120 mL, 120 mmol) at rt. When bubbling ceased the resulting reaction mixture was heated at 60 °C overnight. Reaction was quenched via slow careful addition of 1.0 M of HCl in water (300 mL). THF was removed in vacuo and the resulting residue was partitioned between Et<sub>2</sub>O and water. Layers were separated, and the aqueous layer was extracted with Et<sub>2</sub>O twice. The combined organic solvents were dried over MgSO<sub>4</sub>, filtered and concentrated in vacuo. To a solution of the crude alcohol produced above (**I-103**, 12.3 g, 61.2 mmol) in DCM (154 mL) was added 1*H*-imidazole (8.3 g, 120 mmol) followed by TBSCl (10.1 g, 67.3 mmol) at rt, and the reaction was stirred for 2 h. The reaction was quenched by addition of water (250 mL) and extracted with DCM (200 mL) three times. The combined organic layers were dried over MgSO<sub>4</sub>, filtered, and concentrated in vacuo. The residue was purified on silica gel to provide **I-104** (16.9 g, 87%). <sup>1</sup>H NMR (CDCl<sub>3</sub>) δ 7.54–7.52 (m, 1H), 7.28–7.21 (m, 2H), 7.11–7.05 (m, 1H), 3.84 (t, 2H, *J* = 7.0 Hz), 2.99 (t, 2H, *J* = 7.0 Hz), 0.88 (s, 9H), -0.01 (s, 6H).

**Step 3: 2-(2-([*tert*-Butyl(dimethyl)silyl]oxy)ethyl)benzaldehyde (I-105).** A solution of (2-bromophenethoxy)(*tert*-butyl)dimethylsilane (2.53 g, 8.03 mmol) in THF (36 mL) was cooled to -78 °C, at which point was added 2.50 M of *n*-BuLi in hexane (4.49 mL, 11.2 mmol). After stirring for 5 min, DMF (0.93 mL, 12.0 mmol) was added, and the reaction mixture was stirred at -78 °C for 10 min. The reaction was quenched by adding saturated aq. NH<sub>4</sub>Cl (10 mL) and then was warmed to rt. Reaction mixture was further diluted with water (20 mL) and THF was removed in vacuo. Aqueous residue was diluted with Et<sub>2</sub>O (30 mL), the layers were separated, and the aqueous layer was extracted Et<sub>2</sub>O (30 mL) twice. Combined organic layers were dried over Na<sub>2</sub>SO<sub>4</sub>, filtered, and concentrated in vacuo. The crude residue was purified on silica gel to afford **I-105** (2.11 g, 99%). <sup>1</sup>H NMR (CDCl<sub>3</sub>) δ 10.38 (s, 1H), 7.94 (dd, 1H, *J* = 7.7, 1.2 Hz), 7.63–7.56 (m, 1H), 7.50–7.44 (m, 1H), 7.40 (d, 1H, *J* = 7.6 Hz), 3.94 (t, 2H, *J* = 6.4 Hz), 3.34 (t, 2H, *J* = 6.4 Hz), 0.91 (s, 9H), 0.00 (s, 6H).

**Step 4: [2-(2-([*tert*-Butyl(dimethyl)silyl]oxy)ethyl)phenyl][5-(1,3-dioxolan-2-yl)-2-methyl-3-thienyl]methanol (I-106).** A solution of 2-(4-bromo-5-methyl-2-thienyl)-1,3-dioxolane (1.70 g, 6.82 mmol) in THF (26.6 mL) was cooled to -78 °C, and then 2.50 M of *n*-BuLi in hexane (2.94 mL, 7.35 mmol) was added and the mixture was stirred for 10 min at -78 °C. A solution of 2-(2-([*tert*-butyl(dimethyl)silyl]oxy)ethyl)benzaldehyde (**I-105**, 1.39 g, 5.25 mmol) in THF (13.3 mL) was then added, and the reaction was stirred for 10 min at -78 °C. The reaction was quenched by adding brine and then warmed to rt. The aqueous mixture was extracted with EtOAc twice. The combined organic solvents were washed with brine, dried and concentrated in vacuo. The residue was purified on silica gel to provide **I-106** (1.96 g, 86%). <sup>1</sup>H NMR (CDCl<sub>3</sub>) δ 7.30–7.26 (m, 2H), 7.26–7.21 (m, 2H), 7.07 (s, 1H), 6.09 (d, 1H, *J* = 2.7 Hz), 6.03 (s, 1H), 4.19–4.13 (m, 2H), 4.06–4.00 (m, 2H), 3.96–3.89 (m, 1H), 3.87–3.77 (m, 1H), 3.52 (d, 1H, *J* = 2.9 Hz), 3.06 (ddd, 1H, *J* = 14.3, 8.4, 6.2 Hz), 2.87 (dt, 1H, *J* = 13.9, 5.2 Hz), 2.37 (s, 3H), 0.86 (s, 9H), -0.00 (s, 3H), -0.01 (s, 3H).

**Step 5: 4-(3,4-Dihydro-1*H*-isochromen-1-yl)-5-methylthiophene-2-carbaldehyde (I-107).** A 100 mL round bottom flask was charged with [2-(2-([*tert*-butyl(dimethyl)silyl]oxy)ethyl)phenyl][5-(1,3-dioxolan-2-yl)-2-methyl-3-thienyl]methanol (1.96 g, 4.51 mmol) and TFA (6.60 mL, 85.7 mmol) at rt. The resulting purple solution was stirred at rt overnight. The reaction mixture was carefully poured into saturated aqueous NaHCO<sub>3</sub> (50 mL). The layers were separated, and the aqueous layer was extracted three times with EtOAc. The combined organic layers were washed with brine, then dried over sodium sulfate, filtered, and concentrated in vacuo. The residue was purified on silica gel to yield **I-107** (1.03 g, 89%). <sup>1</sup>H NMR (CDCl<sub>3</sub>) δ 9.73 (s, 1H), 7.41 (s, 1H), 7.27–7.19 (m, 2H), 7.18–7.12 (m, 1H), 6.75 (d, 1H, *J* = 7.7 Hz), 5.86 (s, 1H), 4.21 (ddd, 1H, *J* = 11.3, 5.5, 3.7 Hz), 3.97 (ddd, 1H, *J* = 11.4, 9.7, 4.0 Hz), 3.16 (ddd, 1H, *J* = 15.9, 9.4, 5.4 Hz), 2.85 (dt, 1H, *J* = 16.6, 3.6 Hz), 2.59 (s, 3H).

## Synthesis of 52

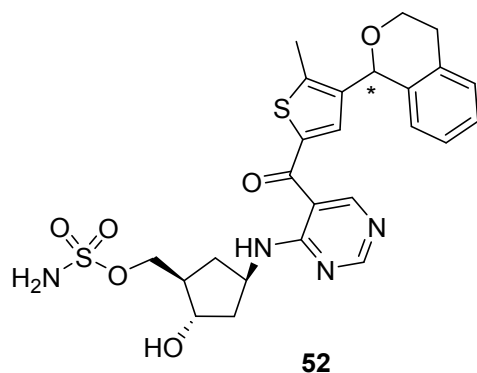

**[(1*R*,2*S*,4*R*)-4-{{5-({4-[(1*R*)-3,4-Dihydro-1*H*-isochromen-1-yl]-5-methyl-2-thienyl}carbonyl)pyrimidin-4-yl}amino}-2-hydroxycyclopentyl]methyl sulfamate or [(1*R*,2*S*,4*R*)-4-{{5-({4-[(1*S*)-3,4-Dihydro-1*H*-isochromen-1-yl]-5-methyl-2-thienyl}carbonyl)pyrimidin-4-yl}amino}-2-hydroxycyclopentyl]methyl sulfamate (**52**).**

Prepared by the method described for the preparation of **23** using 4-chloro-5-iodopyrimidine and intermediate **I-107** in Step 3. The individual diastereomers were obtained using preparative scale chiral SFC. More active epimer **52** is reported. <sup>1</sup>H NMR (400 MHz, MeOD)  $\delta$  8.59 (s, 1H), 8.53 (s, 1H), 7.24 (s, 1H), 7.22–7.15 (m, 2H), 7.16–7.07 (m, 1H), 6.76 (d, 1H,  $J$  = 7.6 Hz), 5.93 (s, 1H), 4.83–4.70 (m, 1H), 4.24–4.10 (m, 4H), 4.01–3.89 (m, 1H), 3.16–3.03 (m, 1H), 2.87–2.76 (m, 1H), 2.54 (s, 3H), 2.52–2.43 (m, 1H), 2.31–2.19 (m, 1H), 2.13 (ddd, 1H,  $J$  = 12.7, 7.4, 4.2 Hz), 1.88 (dt, 1H,  $J$  = 13.6, 7.2 Hz), 1.40 (dt, 1H,  $J$  = 13.1, 9.1 Hz); LCMS (FA):  $m/z$  = 545.2 (M+H). HRMS  $m/z$  [M+H]<sup>+</sup> calcd for C<sub>25</sub>H<sub>28</sub>N<sub>4</sub>O<sub>6</sub>S<sub>2</sub> 545.1529, obsd 545.1550.

### Synthesis of ML-93 and 47

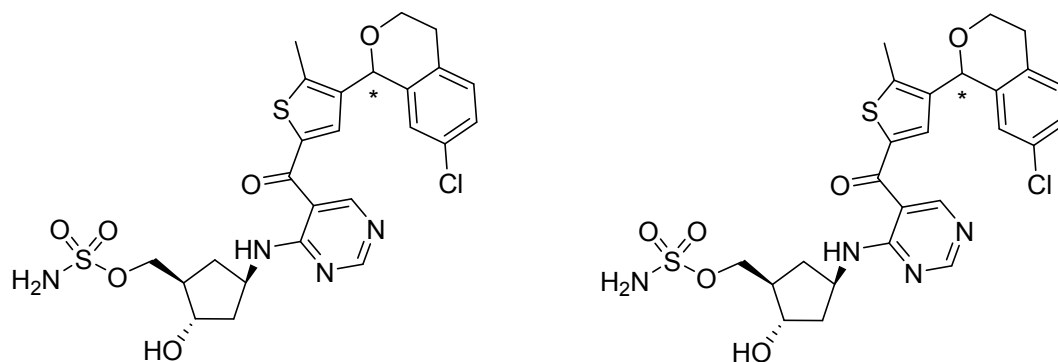

**ML-93 and 47**

**[(1*R*,2*S*,4*R*)-4-{{5-({4-[(1*R*)-7-Chloro-3,4-dihydro-1*H*-isochromen-1-yl]-5-methyl-2-thienyl}carbonyl)pyrimidin-4-yl}amino}-2-hydroxycyclopentyl]methyl sulfamate and [(1*R*,2*S*,4*R*)-4-{{5-({4-[(1*S*)-7-Chloro-3,4-dihydro-1*H*-isochromen-1-yl]-5-methyl-2-thienyl}carbonyl)pyrimidin-4-yl}amino}-2-hydroxycyclopentyl]methyl sulfamate (ML-93 and 47).**

Prepared by the method described for the preparation of **23**. The following alternative conditions were employed in the reaction scheme: Step 3: The required aldehyde used was prepared



following the procedure outlined for the preparation of intermediate **I-107** starting with 2-(2-bromo-4-chlorophenyl)acetic acid in Step 1; Step 5: Base/solvent used was triethylamine/DMF. The individual diastereomers were obtained using preparative scale chiral SFC.

**ML-93**:  $^1\text{H}$  NMR (DMSO- $d_6$ )  $\delta$  8.60 (d, 2H,  $J$  = 9.1 Hz), 8.19 (d, 1H,  $J$  = 7.5 Hz), 7.44 (s, 2H), 7.36 (s, 1H), 7.29–7.22 (m, 2H), 6.75 (s, 1H), 5.91 (s, 1H), 4.88 (d, 1H,  $J$  = 4.6 Hz), 4.75–4.63 (m, 1H), 4.16–4.06 (m, 2H), 4.00–3.92 (m, 2H), 3.88–3.79 (m, 1H), 3.08–2.97 (m, 1H), 2.81–2.73 (m, 1H), 2.48 (s, 3H), 2.37–2.26 (m, 1H), 2.16–2.06 (m, 1H), 1.98–1.89 (m, 1H), 1.80–1.70 (m, 1H), 1.32–1.22 (m, 1H); LCMS (FA):  $m/z$  = 579.2 (M+H). HRMS  $m/z$  [M+H] $^+$  calcd for  $\text{C}_{25}\text{H}_{28}\text{ClN}_4\text{O}_6\text{S}_2$  579.1139, obsd 579.1166.

**47**:  $^1\text{H}$  NMR (MeOD)  $\delta$  8.62 (s, 1H), 8.53 (s, 1H), 7.29 (s, 1H), 7.24–7.14 (m, 2H), 6.77–6.69 (m, 1H), 5.88 (s, 1H), 4.83–4.70 (m, 1H), 4.25–4.09 (m, 4H), 3.98–3.85 (m, 1H), 3.15–2.98 (m, 1H), 2.86–2.71 (m, 1H), 2.56–2.42 (m, 4H), 2.31–2.19 (m, 1H), 2.19–2.08 (m, 1H), 1.95–1.83 (m, 1H), 1.46–1.33 (m, 1H); LCMS (FA):  $m/z$  = 579.1 (M+H). HRMS  $m/z$  [M+H] $^+$  calcd for  $\text{C}_{25}\text{H}_{28}\text{ClN}_4\text{O}_6\text{S}_2$  579.1139, obsd 579.1168.

## Synthesis of 48

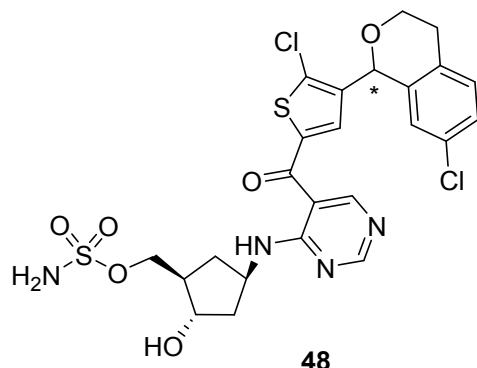

**[(1R,2S,4R)-4-{[5-({5-Chloro-4-[(1R)-7-chloro-3,4-dihydro-1H-isochromen-1-yl]-2-thienyl}carbonyl)pyrimidin-4-yl]amino}-2-hydroxycyclopentyl]methyl sulfamate or [(1R,2S,4R)-4-{[5-({5-Chloro-4-[(1S)-7-chloro-3,4-dihydro-1H-isochromen-1-yl]-2-thienyl}carbonyl)pyrimidin-4-yl]amino}-2-hydroxycyclopentyl]methyl sulfamate (48).**

Prepared by the method described for the preparation of **23**. The following alternative conditions were employed in the reaction scheme: Step 3: The required aldehyde used was prepared following the procedure outlined for the preparation of intermediate **I-107** starting with 2-(2-bromo-4-chlorophenyl)acetic acid in Step 1 and using intermediate **I-92** in Step 3; Step 6: Desilylating agent/solvent used was  $\text{H}_3\text{PO}_4/\text{CH}_3\text{CN}$ . The individual diastereomers were obtained using preparative scale chiral SFC. More active epimer **48** is reported.  $^1\text{H}$  NMR (MeOD)  $\delta$  8.61 (s, 1H), 8.55 (s, 1H), 7.30 (s, 1H), 7.21 (d, 2H  $J$  = 1.5 Hz), 6.77 (s, 1H), 5.95 (s, 1H), 4.83–4.73 (m, 1H), 4.27–4.13 (m, 4H), 3.98–3.88 (m, 1H), 3.15–3.06 (m, 1H), 2.83–2.74 (m, 1H), 2.53–2.43 (m, 1H), 2.30–2.21 (m, 1H), 2.17–2.07 (m, 1H), 1.92–1.83 (m, 1H), 1.47–1.36 (m, 1H); LCMS (FA):  $m/z$  = 599.2 (M+H). HRMS  $m/z$  [M+H] $^+$  calcd for  $\text{C}_{24}\text{H}_{25}\text{Cl}_2\text{N}_4\text{O}_6\text{S}_2$  599.0593, obsd 599.0596.

## Synthesis of 49

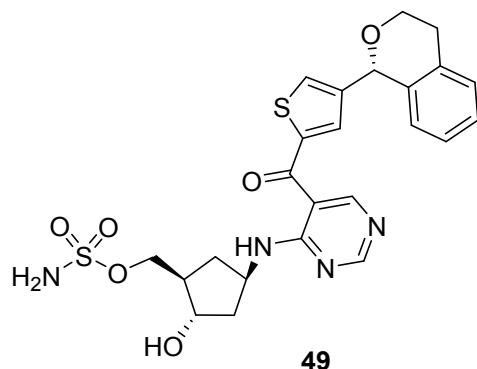

### [(1*R*,2*S*,4*R*)-4-{{5-({4-[(1*R*)-3,4-Dihydro-1*H*-isochromen-1-yl]-2-thienyl}carbonyl)pyrimidin-4-yl}amino}-2-hydroxycyclopentyl]methyl sulfamate (**49**).

Prepared by the method described for the preparation of **23**. The following alternative conditions were employed in the reaction scheme: Step 3: The required aldehyde used was prepared following the procedure outlined for the preparation of intermediate **I-107** starting with 2-(4-bromothiophen-2-yl)-1,3-dioxolane in Step 3; Step 5: Base/solvent used was K<sub>2</sub>CO<sub>3</sub>/DMF. The individual diastereomers were obtained using preparative scale chiral SFC. More active epimer **49** is reported. <sup>1</sup>H NMR (MeOD) δ 8.70 (s, 1H), 8.58 (s, 1H), 7.82–7.74 (m, 1H), 7.59–7.52 (m, 1H), 7.26–7.12 (m, 3H), 6.96–6.87 (m, 1H), 5.92 (s, 1H), 4.85–4.75 (m, 1H), 4.28–4.07 (m, 4H), 4.00–3.89 (m, 1H), 3.10–2.97 (m, 1H), 2.95–2.82 (m, 1H), 2.60–2.47 (m, 1H), 2.34–2.22 (m, 1H), 2.22–2.11 (m, 1H), 1.98–1.84 (m, 1H), 1.51–1.37 (m, 1H); LCMS (FA): *m/z* = 531.6 (M+H). HRMS *m/z* [M+H]<sup>+</sup> calcd for C<sub>24</sub>H<sub>27</sub>N<sub>4</sub>O<sub>6</sub>S<sub>2</sub> 531.1372, obsd 531.1396.

## Synthesis of 50

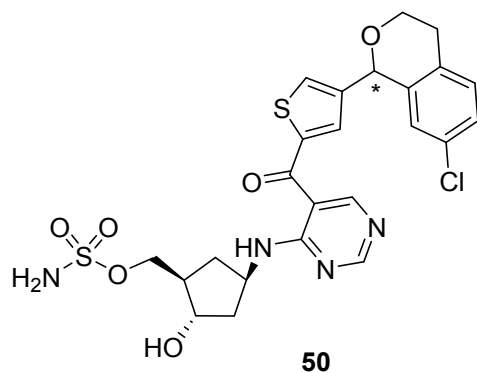

### [(1*R*,2*S*,4*R*)-4-{{5-({4-[(1*R*)-7-Chloro-3,4-dihydro-1*H*-isochromen-1-yl]-2-thienyl}carbonyl)pyrimidin-4-yl}amino}-2-hydroxycyclopentyl]methyl sulfamate or [(1*R*,2*S*,4*R*)-4-{{5-({4-[(1*S*)-7-Chloro-3,4-dihydro-1*H*-isochromen-1-yl]-2-thienyl}carbonyl)pyrimidin-4-yl}amino}-2-hydroxycyclopentyl]methyl sulfamate (**50**).

Prepared by the method described for the preparation of **23**. The following alternative conditions were employed in the reaction scheme: Step 3: The required aldehyde used was prepared

following the procedure outlined for the preparation of intermediate **I-107** starting with 2-(2-bromo-4-chlorophenyl)acetic acid in Step 1 and using 2-(4-bromothiophen-2-yl)-1,3-dioxolane in Step 3; Step 5: Base/solvent used was triethylamine/DMF. The individual diastereomers were obtained using preparative scale chiral SFC. More active epimer **50** is reported. <sup>1</sup>H NMR (DMSO-*d*<sub>6</sub>) δ 8.65 (s, 1H), 8.64 (s, 1H), 8.26 (d, 1H, *J* = 7.5 Hz), 7.95 (s, 1H), 7.64 (d, 1H, *J* = 1.2 Hz), 7.44 (s, 2H), 7.30–7.22 (m, 2H), 6.91 (s, 1H), 5.91 (s, 1H), 4.89 (d, 1H, *J* = 4.5 Hz), 4.77–4.65 (m, 1H), 4.13–4.01 (m, 2H), 4.01–3.91 (m, 2H), 3.87–3.78 (m, 1H), 3.01–2.91 (m, 1H), 2.83–2.74 (m, 1H), 2.37–2.28 (m, 1H), 2.18–2.09 (m, 1H), 1.99–1.91 (m, 1H), 1.81–1.72 (m, 1H), 1.34–1.23 (m, 1H); LCMS (FA): *m/z* = 565.1 (M+H). HRMS *m/z* [M+H]<sup>+</sup> calcd for C<sub>24</sub>H<sub>26</sub>ClN<sub>4</sub>O<sub>6</sub>S<sub>2</sub> 565.0982, obsd 565.0995.

## Synthesis of 51

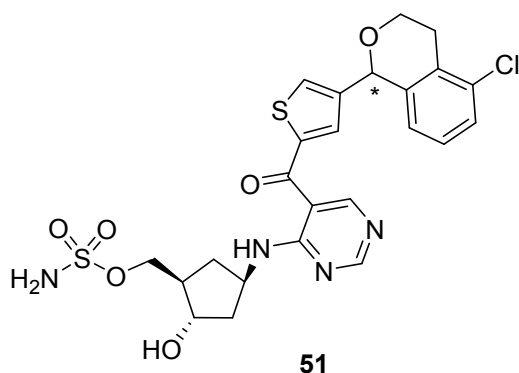

**[(1*R*,2*S*,4*R*)-4-{{5-({4-[(1*R*)-5-Chloro-3,4-dihydro-1*H*-isochromen-1-yl]-2-thienyl}carbonyl)pyrimidin-4-yl}amino}-2-hydroxycyclopentyl]methyl sulfamate or [(1*R*,2*S*,4*R*)-4-{{5-({4-[(1*S*)-5-Chloro-3,4-dihydro-1*H*-isochromen-1-yl]-2-thienyl}carbonyl)pyrimidin-4-yl}amino}-2-hydroxycyclopentyl]methyl sulfamate (**51**).**

Prepared by the method described for the preparation of **23**. The following alternative conditions were employed in the reaction scheme: Step 3: The required aldehyde used was prepared following the procedure outlined for the preparation of intermediate **I-107** starting with 2-(2-bromo-6-chlorophenyl)acetic acid in Step 1 and using 2-(4-bromothiophen-2-yl)-1,3-dioxolane in Step 3; Step 5: Base/solvent used was K<sub>2</sub>CO<sub>3</sub>/DMF. The individual diastereomers were obtained using preparative scale chiral HPLC. More active epimer **51** is reported. <sup>1</sup>H NMR (MeOD) δ 8.70 (s, 1H), 8.59 (s, 1H), 7.83–7.75 (m, 1H), 7.60–7.52 (m, 1H), 7.38–7.29 (m, 1H), 7.20–7.12 (m, 1H), 6.94–6.85 (m, 1H), 5.92 (s, 1H), 4.85–4.76 (m, 1H), 4.28–4.09 (m, 4H), 3.96 (d, 1H, *J* = 12.1, 7.6, 5.1 Hz), 3.04–2.84 (m, 2H), 2.61–2.45 (m, 1H), 2.34–2.22 (m, 1H), 2.17 (m, 1H), 1.99–1.85 (m, 1H), 1.53–1.37 (m, 1H); LCMS (FA): *m/z* = 565.1 (M+H). HRMS *m/z* [M+H]<sup>+</sup> calcd for C<sub>24</sub>H<sub>26</sub>ClN<sub>4</sub>O<sub>6</sub>S<sub>2</sub> 565.0982, obsd 565.1003.

## Synthesis of Intermediate I-109

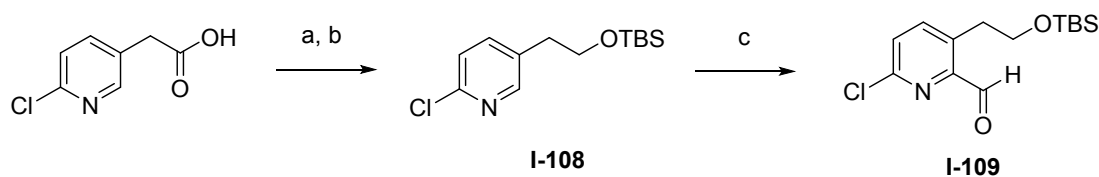

Reagents: (a)  $\text{BH}_3$ -THF, THF, 80 °C, 0.5 h; (b) TBSCl, imidazole, DCM, rt, 0.5 h, 89% for 2 steps; (c) *n*-BuLi, *N,N*-dimethylaminoethanol, DMF, hexane, -78 °C, 1 h, 55%.

**Step 1: 5-(2-([*tert*-Butyl(dimethyl)silyl]oxy)ethyl)-2-chloropyridine (I-108).** The title compound was prepared as described in Step 1 and 2 of the synthesis of intermediate **I-107** starting with 2-(6-chloropyridin-3-yl)acetic acid.

**Step 2: 3-(2-([*tert*-Butyl(dimethyl)silyl]oxy)ethyl)-6-chloropyridine-2-carbaldehyde (I-109).** To a solution of *N,N*-dimethylaminoethanol (4.43 mL, 44.1 mmol) in hexane (25 mL) was added a 2.5 M solution of *n*-BuLi in hexane (36.7 mL, 91.7 mmol), dropwise over 30 min via syringe at 0 °C. The reaction mixture was stirred at 0 °C then cooled to -78 °C. To the resulting mixture was added a solution of 5-(2-([*tert*-butyl(dimethyl)silyl]oxy)ethyl)-2-chloropyridine (4.0 g, 14.7 mmol) in hexane (25 mL), dropwise over 15 min, via syringe. The reaction mixture was stirred at -78 °C for 1 hour followed by addition of a solution of DMF (5.13 mL, 66.2 mmol) in THF (26 mL), dropwise over 15 min, via syringe. The resulting solution was stirred at -78 °C for 1 hour then quenched with saturated aqueous  $\text{NH}_4\text{Cl}$  and extracted with EtOAc. The combined organic layers were washed with brine, dried over  $\text{MgSO}_4$ , filtered and concentrated in vacuo. The crude material was purified on silica gel to provide **I-109** (2.44 g, 55%).  $^1\text{H}$  NMR ( $\text{CDCl}_3$ )  $\delta$  10.15 (s, 1H), 7.77 (d, 1H,  $J = 8.1$  Hz), 7.50 (d, 1H,  $J = 8.1$  Hz), 3.91 (t, 2H,  $J = 5.9$  Hz), 3.32 (t, 2H,  $J = 5.9$  Hz), 0.89 (s, 9H), -0.00 (s, 6H); LCMS (FA):  $m/z = 300.1$  (M+H).

## Synthesis of 54

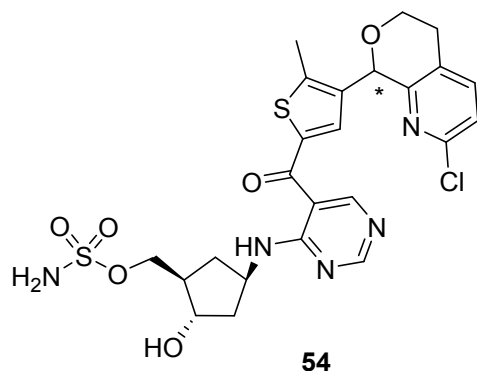

[(1*R*,2*S*,4*R*)-4-{[5-({4-[(8*S*)-2-Chloro-5,8-dihydro-6*H*-pyrano[3,4-*b*]pyridin-8-yl]-5-methyl-2-thienyl}carbonyl)pyrimidin-4-yl]amino}-2-hydroxycyclopentyl]methyl sulfamate or [(1*R*,2*S*,4*R*)-4-{[5-({4-[(8*R*)-2-Chloro-5,8-dihydro-6*H*-pyrano[3,4-*b*]pyridin-8-yl]-5-methyl-2-thienyl}carbonyl)pyrimidin-4-yl]amino}-2-hydroxycyclopentyl]methyl sulfamate (**54**).

Prepared by the method described for the preparation of **23**. The following alternative conditions were employed in the reaction scheme: Step 3: The required aldehyde used was prepared

following the procedure outlined for the preparation of intermediate **I-107** using intermediate **I-109** in Step 3; Step 5: Base/solvent used was  $K_2CO_3$ /DMF; Step 6: Desilylating agent/solvent used was TBAF/THF. The individual diastereomers were obtained using preparative scale chiral SFC. More active epimer **54** is reported.  $^1H$  NMR ( $DMSO-d_6$ )  $\delta$  8.59 (s, 1H), 8.51 (s, 1H), 8.17 (d, 1H,  $J = 7.5$  Hz), 7.72 (d, 1H,  $J = 8.1$  Hz), 7.42 (s, 2H), 7.36 (d, 1H,  $J = 8.0$  Hz), 7.29 (s, 1H), 5.88 (s, 1H), 4.87 (d, 1H,  $J = 4.6$  Hz), 4.74–4.61 (m, 1H), 4.14–4.04 (m, 2H), 3.98–3.82 (m, 3H), 3.12–3.00 (m, 1H), 2.86–2.75 (m, 1H), 2.50 (s, 3H), 2.32–2.24 (m, 1H), 2.16–2.05 (m, 1H), 1.97–1.88 (m, 1H), 1.79–1.68 (m, 1H), 1.31–1.20 (m, 1H); LCMS (FA):  $m/z = 580.1$  (M+H). HRMS  $m/z$  [M+H] $^+$  calcd for  $C_{24}H_{27}ClN_5O_6S_2$  580.1091, obsd 580.1092.

### Synthesis of Intermediate I-111

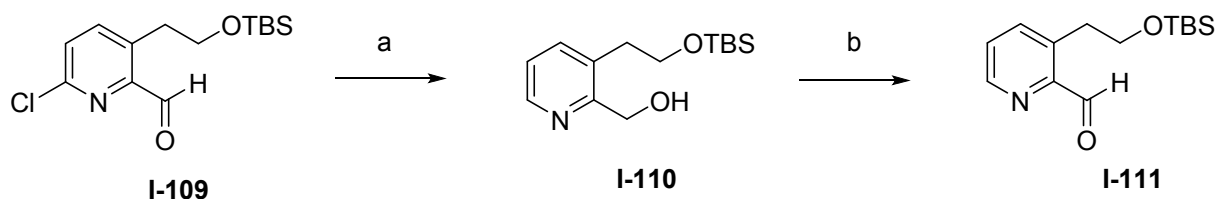

Reagents: (a)  $Pd(OH)_2$ ,  $H_2$ , EtOH, rt, 15 h, 95%; (b)  $MnO_2$ , DCM, rt, 20 h, 66%.

**Step 1: [3-(2-{[*tert*-butyl(dimethyl)silyl]oxy}ethyl)pyridin-2-yl]methanol (I-110).** To a solution of 3-(2-{[*tert*-butyl(dimethyl)silyl]oxy}ethyl)-6-chloropyridine-2-carbaldehyde (**I-109**, 2.30 g, 7.67 mmol) in ethanol (75 mL) was added  $NaHCO_3$  (2.58 g, 30.7 mmol) and  $Pd(OH)_2$  on carbon (10:90, palladium hydroxide:carbon, 0.54 g, 0.38 mmol). The resulting mixture was purged with hydrogen gas, and then stirred at rt under a balloon of hydrogen gas for 15 h. The reaction mixture was filtered over a pad of celite and the filtrate was concentrated to give crude product as a grey residue. The crude material was purified on silica gel to give **I-110** as a clear oil (1.96 g, 95%).  $^1H$  NMR ( $CDCl_3$ )  $\delta$  8.54–8.49 (m, 1H), 7.66–7.54 (m, 1H), 7.31–7.22 (m, 1H), 4.84 (s, 2H), 3.87 (t, 2H,  $J = 6.4$  Hz), 2.81 (t, 2H,  $J = 6.4$  Hz), 0.88 (s, 9H), -0.00 (s, 6H); LCMS (FA):  $m/z = 268.2$  (M+H).

**Step 2: 3-(2-{[*tert*-butyl(dimethyl)silyl]oxy}ethyl)pyridine-2-carbaldehyde (I-111).** To a solution of [3-(2-{[*tert*-butyl(dimethyl)silyl]oxy}ethyl)pyridin-2-yl]methanol (2.0 g, 7.46 mmol) in DCM (72 mL) was added  $MnO_2$  (6.50 g, 74.7 mmol). The reaction mixture was stirred at rt for 20 h then filtered over a pad of celite. The resulting filtrate was concentrated in vacuo. The crude material was purified on silica gel to afford **I-111** as a clear oil (1.31 g, 66%).  $^1H$  NMR ( $CDCl_3$ )  $\delta$  10.28 (d, 1H,  $J = 0.5$  Hz), 8.83–8.64 (m, 1H), 7.91–7.72 (m, 1H), 7.55–7.44 (m, 1H), 3.95 (t, 2H,  $J = 6.1$  Hz), 3.37 (t, 2H,  $J = 6.1$  Hz), 0.90 (s, 9H), -0.00 (s, 6H); LCMS (FA):  $m/z = 266.2$  (M+H).

### Synthesis of 53

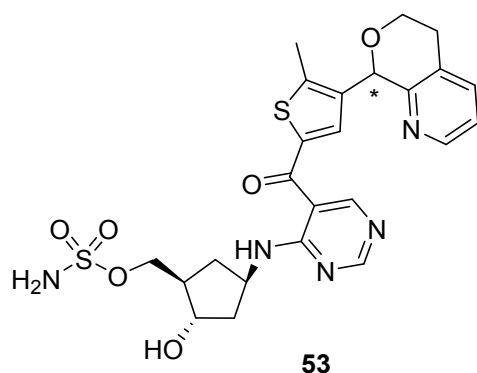

**[(1*R*,2*S*,4*R*)-4-{{5-({4-[(8*S*)-5,8-Dihydro-6*H*-pyrano[3,4-*b*]pyridin-8-yl]-5-methyl-2-thienyl}carbonyl)pyrimidin-4-yl}amino}-2-hydroxycyclopentyl]methyl sulfamate or [(1*R*,2*S*,4*R*)-4-{{5-({4-[(8*R*)-5,8-Dihydro-6*H*-pyrano[3,4-*b*]pyridin-8-yl]-5-methyl-2-thienyl}carbonyl)pyrimidin-4-yl}amino}-2-hydroxycyclopentyl]methyl sulfamate (**53**).**

Prepared by the method described for the preparation of **23**. The following alternative conditions were employed in the reaction scheme: Step 3: The required aldehyde used was prepared following the procedure outlined for the preparation of intermediate **I-107** using intermediate **I-111** in Step 3; Step 5: Base/solvent used was K<sub>2</sub>CO<sub>3</sub>/DMF; Step 6: Desilylating agent/solvent used was TBAF/THF. The individual diastereomers were obtained using preparative scale chiral HPLC. More active epimer **53** is reported. <sup>1</sup>H NMR (MeOD) δ 8.63 (s, 1H), 8.54 (s, 1H), 8.34 (dd, 1H, *J* = 4.8, 1.5 Hz), 7.70 (d, 1H, *J* = 7.8 Hz), 7.31 (dd, 1H, *J* = 7.8, 4.8 Hz), 7.13 (s, 1H), 5.93 (s, 1H), 4.83–4.69 (m, 1H), 4.25–4.11 (m, 4H), 4.02–3.91 (m, 1H), 3.22–3.08 (m, 1H), 2.99–2.88 (m, 1H), 2.55 (s, 3H), 2.52–2.45 (m, 1H), 2.33–2.21 (m, 1H), 2.20–2.09 (m, 1H), 1.93–1.84 (m, 1H), 1.50–1.36 (m, 1H); LCMS (FA): *m/z* = 546.0 (*M*+*H*). HRMS *m/z* [*M*+*H*]<sup>+</sup> calcd for C<sub>24</sub>H<sub>28</sub>N<sub>5</sub>O<sub>6</sub>S<sub>2</sub> 546.1481, obsd 546.1483.

### Synthesis of Intermediate I-114

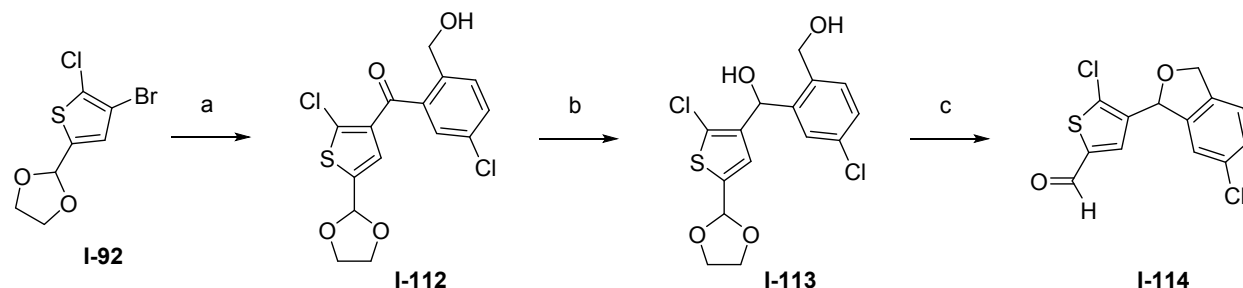

Reagents: (a) 6-Chlorophthalide, *n*-BuLi, THF, -78 °C, 10 min, 99%; (b) NaBH<sub>4</sub>, THF, MeOH, rt, 1 h, 67%; (c) TFA, DCM, rt, 1 h, 76%.

### Step 1: [2-Chloro-5-(1,3-dioxolan-2-yl)-3-thienyl][5-chloro-2-

**(hydroxymethyl)phenyl]methanone (I-112).** To a two-neck 100 mL round-bottom flask containing THF (40 mL) cooled at -78 °C was added 2.50 M of *n*-BuLi in hexane (1.90 mL, 4.75 mmol). The solution was stirred for 10 min under an atmosphere of argon at -78 °C. A solution of intermediate **I-92** (0.96 g, 3.55 mmol) in THF (3.0 mL) was added dropwise quickly and a light yellow precipitate formed. The mixture was stirred at -78 °C for 10 min. A solution of 6-

chlorophthalide (0.57 g, 3.38 mmol) in THF (2.0 mL) was added quickly and the reaction turned to a dark yellow/orange solution. The solution was allowed to stir for 10 min. The reaction was removed from the dry ice bath and quenched with saturated  $\text{NH}_4\text{Cl}$ . After warming to rt, the reaction was diluted with EtOAc and saturated  $\text{NH}_4\text{Cl}$ . The layers were separated, and the organic layer was washed with brine, dried over  $\text{Na}_2\text{SO}_4$ , filtered and concentrated in vacuo to afford **I-112** (1.21 g, 99%).

**Step 2: [2-Chloro-5-(1,3-dioxolan-2-yl)-3-thienyl][5-chloro-2-(hydroxymethyl)phenyl]methanol (I-113).** To a solution of [2-chloro-5-(1,3-dioxolan-2-yl)-3-thienyl][5-chloro-2-(hydroxymethyl)phenyl]methanone (1.21 g, 3.38 mmol) in THF (40 mL) and methanol (10 mL) was added sodium tetrahydroborate (0.26 g, 6.77 mmol) at rt portion wise, and the mixture was stirred for 1 h. The reaction was concentrated in vacuo to remove the methanol. The residue was diluted with EtOAc, washed with water and brine, dried over  $\text{Na}_2\text{SO}_4$ , filtered and concentrated in vacuo. Purification was accomplished on silica gel to provide **I-113** as a clear colorless oil (0.82 g, 67%). LCMS (FA):  $m/z = 343.3$  (M+H).

**Step 3: 5-Chloro-4-(6-chloro-1,3-dihydro-2-benzofuran-1-yl)thiophene-2-carbaldehyde (I-114).** A 100 mL round bottom flask was charged with [2-chloro-5-(1,3-dioxolan-2-yl)-3-thienyl][5-chloro-2-(hydroxymethyl)phenyl]methanol (0.63 g, 1.74 mmol) in DCM (4.0 mL) and TFA (15 mL) was added at rt. The reaction mixture was stirred at rt for 1 h. The reaction was carefully poured into saturated  $\text{NaHCO}_3$ , extracted with EtOAc two times, dried over  $\text{Na}_2\text{SO}_4$ , filtered and concentrated in vacuo. The residue was purified on silica gel to give **I-114** as a clear colorless oil (0.39 g, 76%).  $^1\text{H}$  NMR ( $\text{CDCl}_3$ )  $\delta$  9.72 (s, 1H), 7.43 (s, 1H), 7.35 (dd, 1H,  $J = 8.1, 1.5$  Hz), 7.28 (d, 1H,  $J = 2.9$  Hz), 7.13 (s, 1H), 6.37 (s, 1H), 5.32 (dd, 1H,  $J = 12.4, 2.5$  Hz), 5.20 (dd, 1H,  $J = 12.4, 1.4$  Hz).

## Synthesis of 55

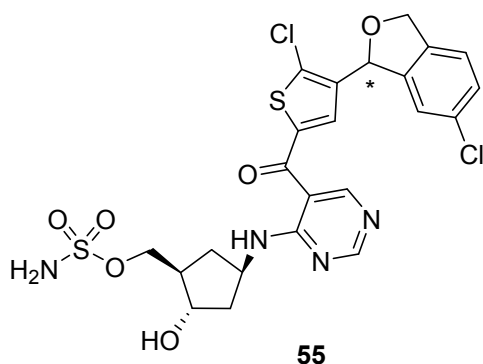

**[(1R,2S,4R)-4-{{5-({5-Chloro-4-[(1R)-6-chloro-1,3-dihydro-2-benzofuran-1-yl]-2-thienyl}carbonyl)pyrimidin-4-yl}amino}-2-hydroxycyclopentyl]methyl sulfamate or [(1R,2S,4R)-4-{{5-({5-Chloro-4-[(1S)-6-chloro-1,3-dihydro-2-benzofuran-1-yl]-2-thienyl}carbonyl)pyrimidin-4-yl}amino}-2-hydroxycyclopentyl]methyl sulfamate (55).**

Prepared by the method described for the preparation of **23** using 4-chloro-5-iodopyrimidine and intermediate **I-114** in Step 3. The individual diastereomers were obtained using preparative scale chiral SFC. More active epimer **55** is reported.  $^1\text{H}$  NMR (MeOD)  $\delta$  8.62 (s, 1H), 8.55 (s, 1H),

7.40–7.27 (m, 3H), 7.14 (s, 1H), 6.36 (s, 1H), 5.28 (dd, 1H,  $J = 12.5, 2.2$  Hz), 5.13 (d, 1H,  $J = 12.4$  Hz), 4.81–4.72 (m, 1H), 4.22–4.08 (m, 3H), 2.55–2.36 (m, 1H), 2.31–2.19 (m, 1H), 2.18–2.07 (m, 1H), 1.93–1.81 (m, 1H), 1.48–1.34 (m, 1H); LCMS (FA):  $m/z = 585.0$  (M+H). HRMS  $m/z$  [M+H]<sup>+</sup> calcd for C<sub>23</sub>H<sub>23</sub>Cl<sub>2</sub>N<sub>4</sub>O<sub>6</sub>S<sub>2</sub> 585.0436, obsd 585.0456.

### Synthesis of Intermediate I-117

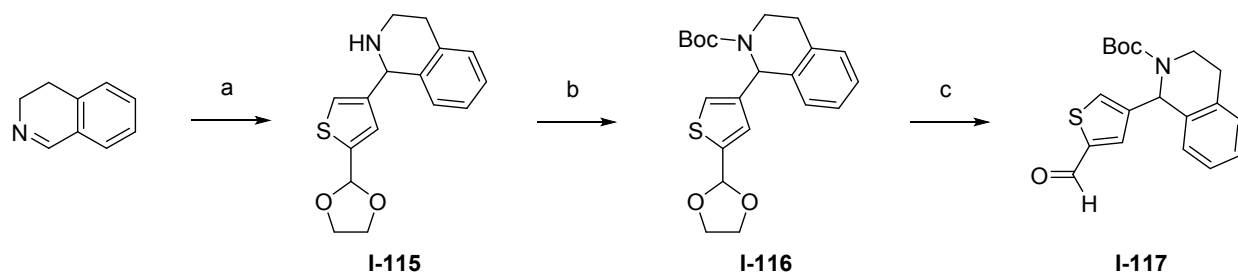

Reagents: (a) BF<sub>3</sub>·OEt<sub>2</sub>, THF, -30 °C, 20 min, then 2-(4-bromo-2-thienyl)-1,3-dioxolane, *n*-BuLi, THF, -78 °C, 20 min; (b) (Boc)<sub>2</sub>O, DMAP, CH<sub>3</sub>CN, rt, 2 h, 27% for 2 steps; (c) Dowex 50WX-2, acetone, rt, 18 h, 91%.

**Step 1: 1-[5-(1,3-Dioxolan-2-yl)-3-thienyl]-1,2,3,4-tetrahydroisoquinoline (I-115).** A solution of 3,4-dihydroisoquinoline (500 mg, 3.81 mmol) in THF (15.4 mL) was cooled at -30 °C. To this solution was added dropwise boron trifluoride etherate (0.53 mL, 4.19 mmol) at -30 °C, and the mixture was stirred for 20 min. Into a separate 50 mL 2-neck flask 2.50 M of *n*-BuLi in hexane (1.83 mL, 4.57 mmol) was added at -78 °C followed by a solution of 2-(4-bromo-2-thienyl)-1,3-dioxolane (1.08 g, 4.57 mmol) in THF (10 mL). After 5 min, lithiated thiophene suspension was added to the above solution of dihydroisoquinoline BF<sub>3</sub>·OEt<sub>2</sub> complex at -78 °C. The reaction was stirred for 20 min at -78 °C and then quenched by addition of water. The layers were separated and the aqueous layer was extracted with EtOAc. The combined organic layers were dried over Na<sub>2</sub>SO<sub>4</sub>, filtered, and concentrated in vacuo. The residue was purified on silica gel to provide **I-115** (513 mg) and some impurities as a red amorphous solid. This mixture was used for the next step without further purification.

**Step 2: *tert*-Butyl 1-[5-(1,3-dioxolan-2-yl)-3-thienyl]-3,4-dihydroisoquinoline-2(1H)-carboxylate (I-116).** The crude mixture from step 1 was dissolved in MeCN (6.97 mL), to which was added (Boc)<sub>2</sub>O (1.25 g, 5.72 mmol) and DMAP (2.33 mg, 19.1 μmol) at rt. After stirring for 2 h, the reaction was quenched by adding water. The layers were separated and the aqueous layer was extracted with EtOAc twice. The combined organics were washed with brine, dried over Na<sub>2</sub>SO<sub>4</sub>, filtered and concentrated in vacuo. The residue was purified on silica gel to provide **I-116** (393 mg, 27% for 2 steps). <sup>1</sup>H NMR (CDCl<sub>3</sub>) δ 7.26–7.03 (m, 6H), 6.82 (s, 1H), 6.01 (s, 1H), 4.17–3.93 (m, 5H), 3.20–3.04 (m, 1H), 3.04–2.86 (m, 1H), 2.79–2.68 (m, 1H), 1.57–1.46 (m, 9H); LCMS (FA):  $m/z = 388.3$  (M+H).

**Step 3: *tert*-Butyl 1-(5-formyl-3-thienyl)-3,4-dihydroisoquinoline-2(1H)-carboxylate (I-117).** To a solution of *tert*-butyl 1-[5-(1,3-dioxolan-2-yl)-3-thienyl]-3,4-dihydroisoquinoline-2(1H)-carboxylate (393 mg, 1.01 mmol) in acetone (7.72 mL) was added 500 mg of Dowex 50WX-2-200 (H)(acid resin), and the mixture was shaken for 18 h at rt. The reaction was filtered through a glass frit funnel and the residual resin was rinsed with acetone several times. To the filtrate was



added saturated aqueous NaHCO<sub>3</sub> (25 mL) and the mixture was concentrated to half volume in vacuo. The residue was diluted with EtOAc, the layers were separated, and the aqueous layer was extracted with EtOAc. The combined organic layers were dried over Na<sub>2</sub>SO<sub>4</sub>, filtered, and concentrated in vacuo. The residue was purified on silica gel to provide **I-117** as a colorless amorphous solid (319 mg, 91%). <sup>1</sup>H NMR (CDCl<sub>3</sub>) δ 9.84 (s, 1H), 7.64 (s, 1H), 7.30–7.07 (m, 5H), 6.48–6.23 (br s, 1H), 4.09–3.88 (m, 1H), 3.22–3.06 (m, 1H), 3.05–2.89 (m, 1H), 2.81–2.69 (m, 1H), 1.52 (s, 9H).

## Synthesis of 58

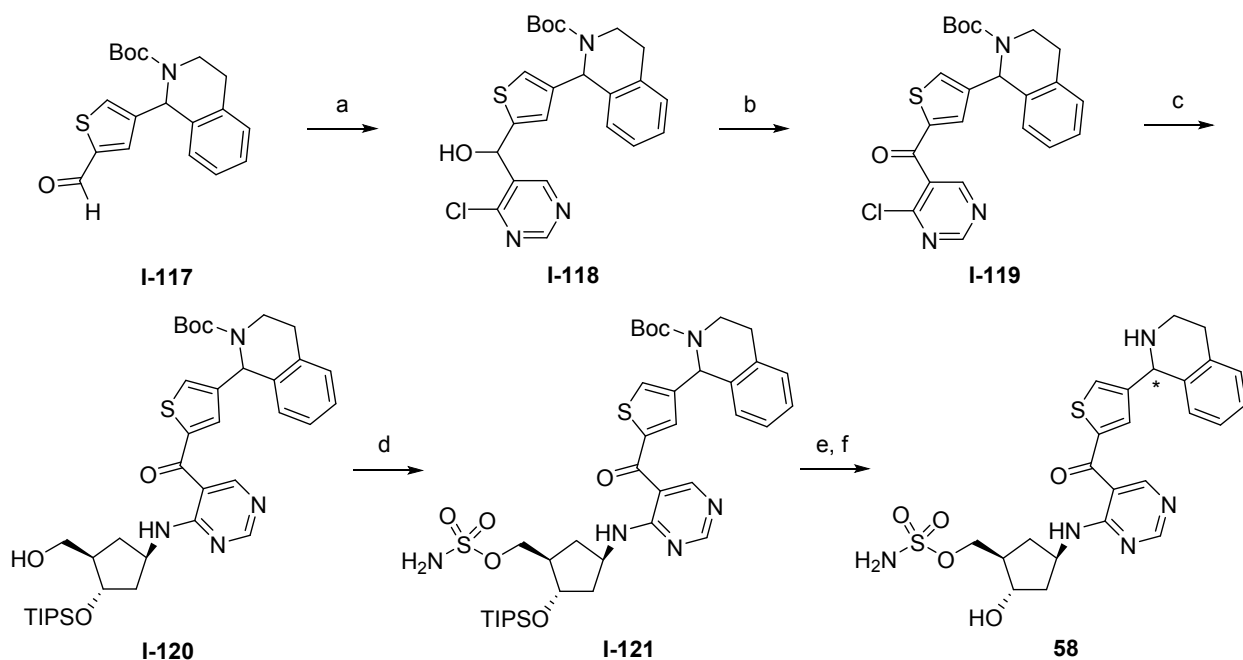

Reagents: (a) 4-chloro-5-iodopyrimidine, *n*-BuLi, THF, -78 °C, 0.5 h, 69%; (b) MnO<sub>2</sub>, DCM, rt, 14 h, 98%; (c) **I-8**, K<sub>2</sub>CO<sub>3</sub>, DMF, rt, 2 h, 86%; (d) chlorosulfonamide, DMF, rt, 3 h, 92%; (e) TBAF monohydrate, THF, rt, 12 h, 78%; (f) TFA, rt, 15 min, 95%.

**Step 1: tert-Butyl 1-{5-[(4-chloropyrimidin-5-yl)(hydroxymethyl)-3-thienyl]-3,4-dihydroisoquinoline-2(1H)-carboxylate (**I-118**)**. The title compound was prepared in an analogous fashion to method described for the preparation of **23** using 4-chloro-5-iodopyrimidine and intermediate **I-117** in Step 3. <sup>1</sup>H NMR (CDCl<sub>3</sub>) δ 9.05 (s, 1H), 8.96 (s, 1H), 7.26–7.17 (m, 3H), 7.12 (s, 1H), 7.02 (s, 1H), 6.78 (s, 1H), 6.40–6.10 (m, 2H), 3.10 (s, 1H), 2.97 (s, 1H), 2.89–2.69 (m, 2H), 1.50 (s, 9H).

**Step 2: tert-Butyl 1-{5-[(4-chloropyrimidin-5-yl)carbonyl]-3-thienyl}-3,4-dihydroisoquinoline-2(1H)-carboxylate (**I-119**)**. The title compound was prepared by the method described for the preparation of **23** in Step 4 using intermediate **I-118**. <sup>1</sup>H NMR (CDCl<sub>3</sub>) δ 9.13 (s, 1H), 8.76 (s, 1H), 7.46 (s, 1H), 7.39 (s, 1H), 7.28–7.21 (m, 3H), 7.11 (d, 1H, *J* = 7.6 Hz), 6.36 (s, 1H), 3.12 (s, 1H), 3.06–2.91 (m, 2H), 2.76 (d, 1H, *J* = 16.0 Hz), 1.47 (s, 9H).

**Step 3:** *tert*-Butyl (1*S*)-1-[5-[4-[[*(1R,3R,4S)*]-3-(hydroxymethyl)-4-triisopropylsilyloxy-cyclopentyl]amino]pyrimidine-5-carbonyl]-3-thienyl]-3,4-dihydro-1*H*-isoquinoline-2-carboxylate and *tert*-butyl (1*R*)-1-[5-[4-[[*(1R,3R,4S)*]-3-(hydroxymethyl)-4-triisopropylsilyloxy-cyclopentyl]amino]pyrimidine-5-carbonyl]-3-thienyl]-3,4-dihydro-1*H*-isoquinoline-2-carboxylate (**I-120**). The title compounds were prepared in an analogous fashion for the synthesis of **23** in Step 5 using intermediate **I-119** and **I-8**. The following alternative conditions were employed in the reaction: Base/solvent used was K<sub>2</sub>CO<sub>3</sub>/DMF. LCMS (FA): *m/z* = 708.1 (M+H).

**Step 4:** *tert*-Butyl (1*S*)-1-[5-[4-[[*(1R,3R,4S)*]-3-(sulfamoyloxymethyl)-4-triisopropylsilyloxy-cyclopentyl]amino]pyrimidine-5-carbonyl]-3-thienyl]-3,4-dihydro-1*H*-isoquinoline-2-carboxylate and *tert*-butyl (1*R*)-1-[5-[4-[[*(1R,3R,4S)*]-3-(sulfamoyloxymethyl)-4-triisopropylsilyloxy-cyclopentyl]amino]pyrimidine-5-carbonyl]-3-thienyl]-3,4-dihydro-1*H*-isoquinoline-2-carboxylate (**I-121**). The title compounds were prepared in a similar fashion to the method described for the preparation of **23** in Step 6 using **I-120** without the final deprotection step. LCMS (FA): *m/z* = 787.1 (M+H).

**Step 5:** [(1*R,2S,4R*)-2-Hydroxy-4-{5-({4-[(1*R*)-1,2,3,4-tetrahydroisoquinolin-1-yl]-2-thienyl}carbonyl)pyrimidin-4-yl}amino}cyclopentyl]methyl sulfamate or [(1*R,2S,4R*)-2-Hydroxy-4-{5-({4-[(1*S*)-1,2,3,4-tetrahydroisoquinolin-1-yl]-2-thienyl}carbonyl)pyrimidin-4-yl}amino}cyclopentyl]methyl sulfamate (**58**).

To a solution of the product mixture from Step 4 (**I-121**, 392 mg, 0.50 mmol) in THF (7.7 mL) was added a solution of TBAF hydrate (278 mg, 1.0 mmol) in THF (7.7 mL) at rt, and the mixture was stirred for 3h. The reaction was quenched by addition of water and extracted with EtOAc three times. The combined organic layers were dried over Na<sub>2</sub>SO<sub>4</sub>, filtered, and concentrated in vacuo. The residue was purified on silica gel to provide the Boc-protected intermediate as a light yellow amorphous solid (245 mg, 78%). LCMS (FA): *m/z* = 630.9 (M+H). To a flask containing the product mixture from the above reaction (245 mg, 0.39 mmol) was added TFA (3.1 mL, 39.9 mmol) and the mixture was stirred at rt for 15 min. The mixture was concentrated in vacuo and a small amount of saturated NaHCO<sub>3</sub> was added to the residue. The resulting mixture was concentrated in vacuo and the residue was purified on silica gel [eluting with 50% DCM in mixed solution of (2% NH<sub>4</sub>OH: 5% MeOH: 43% CH<sub>3</sub>CN in 50% DCM) for 3min then gradient to 100% of mixed solution (2% NH<sub>4</sub>OH: 5% MeOH: 43% CH<sub>3</sub>CN in 50% DCM)] to provide the final compound as a mixture of diastereomers (196 mg, 95%). The individual diastereomers were obtained using preparative scale chiral HPLC. More active epimer **58** is reported. <sup>1</sup>H NMR (MeOD) δ 8.73 (s, 1H), 8.56 (s, 1H), 7.64 (s, 1H), 7.57 (s, 1H), 7.21–7.13 (m, 2H), 7.14–7.05 (m, 1H), 6.87 (d, 1H, *J* = 7.7 Hz), 5.25 (s, 1H), 4.82–4.74 (m, 1H), 4.25–4.10 (m, 3H), 3.23–3.13 (m, 1H), 3.10–2.81 (m, 3H), 2.50 (dt, 1H, *J* = 13.9, 7.7 Hz), 2.32–2.20 (m, 1H), 2.14 (ddd, 1H, *J* = 12.5, 7.4, 4.4 Hz), 1.89 (dt, 1H, *J* = 14.9, 7.5 Hz), 1.42 (dt, 1H, *J* = 13.0, 9.1 Hz); LCMS (FA): *m/z* = 530.6 (M+H). HRMS *m/z* [M+H]<sup>+</sup> calcd for C<sub>24</sub>H<sub>28</sub>N<sub>5</sub>O<sub>5</sub>S<sub>2</sub> 530.1532, obsd 530.1531.

## Synthesis of Intermediate I-122

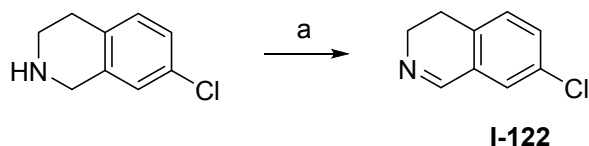

Reagents: (a) MnO<sub>2</sub>, DCM, rt, 16 h, 83%.

**Step 1: 7-Chloro-3,4-dihydroisoquinoline (I-122).** To a solution of 7-chloro-1,2,3,4-tetrahydro-isoquinoline (1.15 g, 6.86 mmol) in DCM (70 mL) was added MnO<sub>2</sub> (5.96 g, 68.6 mmol) at rt, and the mixture was stirred for 16 h. The reaction was filtered through a celite pad and the residual solid was rinsed with DCM several times. The filtrate was concentrated in vacuo and the residue was purified on silica gel to provide **I-122** as a colorless solid (915 mg, 83%). <sup>1</sup>H NMR (DMSO-*d*<sub>6</sub>) δ 8.35 (t, 1H, *J* = 2.1 Hz), 7.52 (d, 1H, *J* = 2.2 Hz), 7.46 (dd, 1H, *J* = 8.0, 2.3 Hz), 7.28 (d, 1H, *J* = 8.0 Hz), 3.70–3.63 (m, 2H), 2.71–2.65 (m, 2H).

### Synthesis of TAK-981 and 56

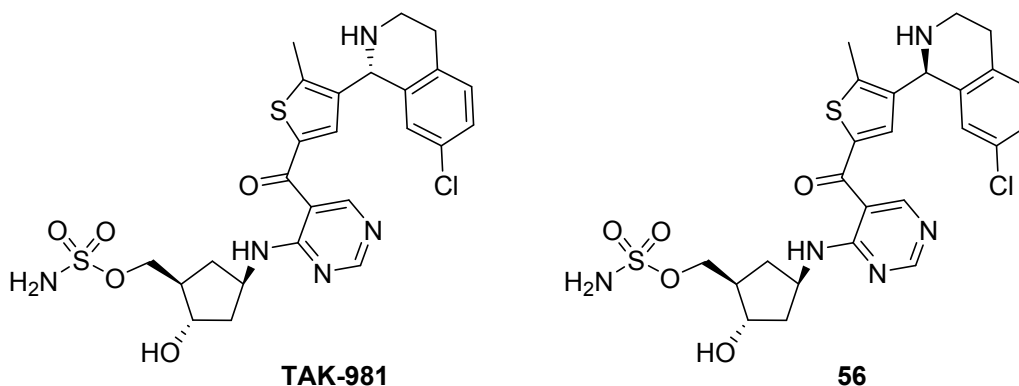

**[(1*R*,2*S*,4*R*)-4-{{5-({4-[(1*R*)-7-Chloro-1,2,3,4-tetrahydroisoquinolin-1-yl]-5-methyl-2-thienyl}carbonyl)pyrimidin-4-yl}amino}-2-hydroxycyclopentyl]methyl sulfamate (TAK-981) and [(1*R*,2*S*,4*R*)-4-{{5-({4-[(1*S*)-7-Chloro-1,2,3,4-tetrahydroisoquinolin-1-yl]-5-methyl-2-thienyl}carbonyl)pyrimidin-4-yl}amino}-2-hydroxycyclopentyl]methyl sulfamate (**56**).** Prepared by the method described for the preparation of **58**. The required aldehyde used in Step 1 was prepared following the procedure outlined for the preparation of intermediate **I-117** starting with 2-(4-bromo-5-methyl-2-thienyl)-1,3-dioxolane and intermediate **I-122**. The individual diastereomers were resolved using silica gel column chromatography in Step 3.

**TAK-981:** <sup>1</sup>H NMR (MeOD) δ 8.63 (s, 1H), 8.53 (s, 1H), 7.29 (s, 1H), 7.17 (s, 2H), 6.71 (s, 1H), 5.23 (s, 1H), 4.83–4.69 (m, 1H), 4.32–4.07 (m, 3H), 3.40–3.23 (m, 1H), 3.12–2.94 (m, 2H), 2.90–2.75 (m, 1H), 2.61 (s, 3H), 2.55–2.39 (m, 1H), 2.33–2.19 (m, 1H), 2.18–2.09 (m, 1H), 1.96–1.78 (m, 1H), 1.50–1.34 (m, 1H); LCMS (FA): *m/z* = 578.4 (M+H). HRMS *m/z* [M+H]<sup>+</sup> calcd for C<sub>25</sub>H<sub>29</sub>ClN<sub>5</sub>O<sub>5</sub>S<sub>2</sub> 578.1299, obsd 578.1302.

**56:** <sup>1</sup>H NMR (MeOD) δ 8.63 (s, 1H), 8.53 (s, 1H), 7.29 (s, 1H), 7.17 (s, 2H), 6.71 (s, 1H), 5.23 (s, 1H), 4.83–4.70 (m, 1H), 4.27–4.10 (m, 3H), 3.41–3.24 (m, 1H), 3.15–2.95 (m, 2H), 2.87–2.76 (m, 1H), 2.61 (s, 3H), 2.55–2.38 (m, 1H), 2.33–2.20 (m, 1H), 2.18–2.08 (m, 1H), 1.96–1.80 (m,

1H), 1.48–1.33 (m, 1H); LCMS (FA):  $m/z$  = 578.4 (M+H). HRMS  $m/z$  [M+H]<sup>+</sup> calcd for C<sub>25</sub>H<sub>29</sub>ClN<sub>5</sub>O<sub>5</sub>S<sub>2</sub> 578.1299, obsd 578.1296.

### An Alternative Synthesis of TAK-981

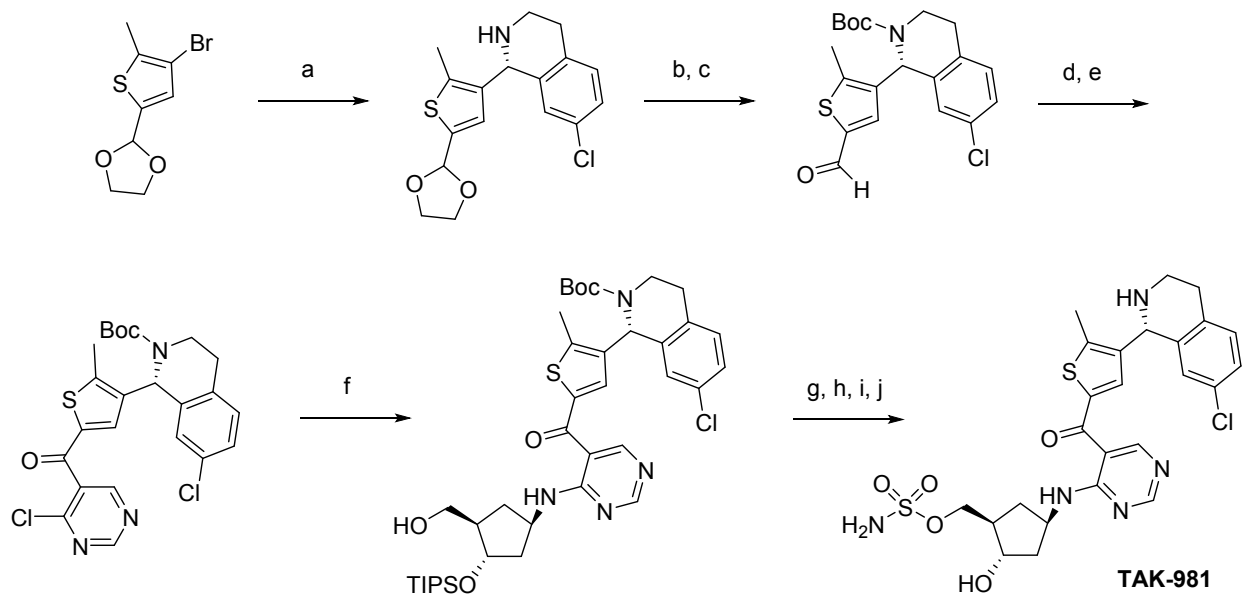

Reagents: (a) *n*-BuLi, THF, -78 °C, 20 min, then **1-122**, BF<sub>3</sub>-OEt<sub>2</sub>, THF, 0 °C, 1 h, then chiral SFC chromatography, 21%; (b) (Boc)<sub>2</sub>O, DCM, rt, 3 h; (c) 1M HCl, THF, rt, 1 h, 81% for 2 steps; (d) 4-chloro-5-iodopyrimidine, *n*-BuLi, THF, -40 °C, 10 min, then rt, 30 min; (e) MnO<sub>2</sub>, DCM, 30 °C, 4 h, 58% for 2 steps; (f) **1-8**, K<sub>2</sub>CO<sub>3</sub>, DMF, rt, 5 h, 84%; (g) chlorosulfonamide, DMF, rt, 5 min; (h) TBAF hydrate, THF, 40 °C, 2 h, 88% for 2 steps; (i) TFA, DCM, rt, 1 h; (j) MeOH/CH<sub>3</sub>CN recrystallization, 81%, for 2 steps.

**[(1*R*,2*S*,4*R*)-4-{[5-({4-[(1*R*)-7-Chloro-1,2,3,4-tetrahydroisoquinolin-1-yl]-5-methyl-2-thienyl}carbonyl)pyrimidin-4-yl]amino}-2-hydroxycyclopentyl]methyl sulfamate (TAK-981).**

For a detailed synthesis see: Huszar, D. et al. “A small molecule SUMOylation inhibitor activates antitumor immune responses and potentiates immune therapies in preclinical models.” *Science Translational Medicine*, submitted, manuscript under revision.

### Synthesis of 57

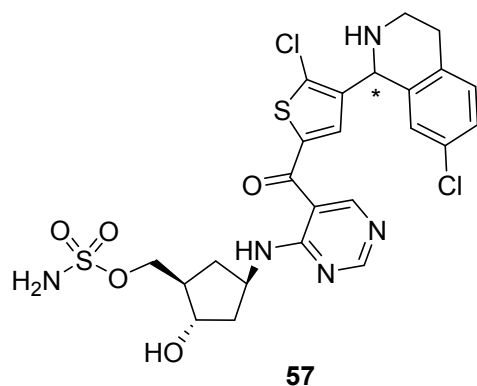

**[(1*R*,2*S*,4*R*)-4-{[5-({5-Chloro-4-[(1*R*)-7-chloro-1,2,3,4-tetrahydroisoquinolin-1-yl]-2-thienyl}carbonyl)pyrimidin-4-yl]amino}-2-hydroxycyclopentyl]methyl sulfamate or [(1*R*,2*S*,4*R*)-4-{[5-({5-Chloro-4-[(1*S*)-7-chloro-1,2,3,4-tetrahydroisoquinolin-1-yl]-2-thienyl}carbonyl)pyrimidin-4-yl]amino}-2-hydroxycyclopentyl]methyl sulfamate (**57**).**

Prepared by the method described for the preparation of **58**. The required aldehyde used in Step 1 was prepared following the procedure outlined for the preparation of intermediate **I-117** starting with intermediate **I-92** and **I-122**. The individual diastereomers were resolved using silica gel column chromatography in Step 3. More active epimer **57** is reported. <sup>1</sup>H NMR (DMSO-*d*<sub>6</sub>) δ 8.61 (s, 1H), 8.57 (s, 1H), 8.15 (d, 1H, *J* = 7.0 Hz), 7.49–7.36 (m, 3H), 7.25–7.12 (m, 2H), 6.67 (s, 1H), 5.17 (s, 1H), 4.86 (d, 1H, *J* = 4.3 Hz), 4.74–4.60 (m, 1H), 4.13–4.03 (m, 1H), 3.99–3.88 (m, 2H), 3.23–3.02 (m, 2H), 2.98–2.83 (m, 2H), 2.75–2.63 (m, 1H), 2.36–2.23 (m, 1H), 2.15–2.03 (m, 1H), 1.95–1.83 (m, 1H), 1.78–1.65 (m, 1H), 1.33–1.17 (m, 1H); LCMS (FA): *m/z* = 598.3 (M+H). HRMS *m/z* [M+H]<sup>+</sup> calcd for C<sub>24</sub>H<sub>26</sub>Cl<sub>2</sub>N<sub>5</sub>O<sub>5</sub>S<sub>2</sub> 598.0752, obsd 598.0757.

### Synthesis of Intermediate I-127

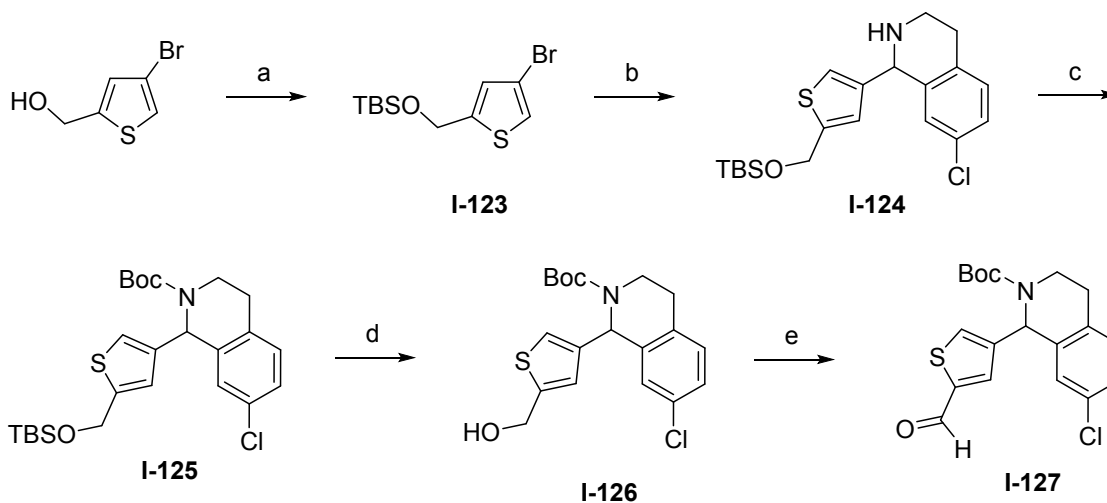

Reagents: (a) TBSCl, imidazole, DCM, rt, 12 h, 95%; (b) *n*-BuLi, THF, -78 °C, 10 min, then **I-122**, BF<sub>3</sub>·OEt<sub>2</sub>, THF, -30 °C, 0.5 h; (c) (Boc)<sub>2</sub>O, DMAP, CH<sub>3</sub>CN, rt, 0.5 h, 50% for 2 steps; (d) 1N HCl, THF, 40 °C, 2 h, 91%; (e) Dess-Martin periodinane, DCM, rt, 0.5 h, 88%.

**Step 1: [(4-Bromo-2-thienyl)methoxy](*tert*-butyl)dimethylsilane (I-123).** To a solution of (4-bromo-2-thienyl)methanol (5.0 g, 26 mmol) in DCM (83 mL) was added 1*H*-imidazole (3.53 g, 51.8 mmol) followed by TBSCl (4.29 g, 28.5 mmol) at rt, and the reaction was stirred overnight. The reaction was quenched by addition of water (50 mL) and extracted with DCM (30 mL) twice. The combined organic layers were dried over Na<sub>2</sub>SO<sub>4</sub>, filtered, and concentrated in vacuo. The crude residue was purified on silica gel to provide **I-123** (7.59 g, 95%). <sup>1</sup>H NMR (CDCl<sub>3</sub>) δ 7.02 (d, 1H, *J* = 1.4 Hz), 6.73–6.70 (m, 1H), 4.72 (d, 2H, *J* = 0.9 Hz), 0.82 (s, 9H), 0.00 (s, 6H).

**Step 2: 1-[5-({*tert*-Butyl(dimethyl)silyl}oxy)methyl]-3-thienyl]-7-chloro-1,2,3,4-tetrahydroisoquinoline (I-124).** The title compound was prepared by the method described for the preparation of intermediate **I-117** in Step 1 starting with intermediates **I-123** and **I-122**.

**Step 3: *tert*-Butyl 1-[5-({*tert*-butyl(dimethyl)silyl}oxy)methyl]-3-thienyl]-7-chloro-3,4-dihydroisoquinoline-2(1*H*)-carboxylate (I-125).** The title compound was prepared by the method described for the preparation of intermediate **I-117** in Step 2 using intermediate **I-124**. <sup>1</sup>H NMR (DMSO- *d*<sub>6</sub>) δ 7.29–7.23 (m, 3H), 6.91 (br s, 1H), 6.82 (s, 1H), 6.18 (br s, 1H), 4.78 (s, 2H), 3.97–3.80 (m, 1H), 3.17–3.08 (m, 1H), 2.81–2.71 (m, 2H), 1.43 (s, 9H), 0.85 (s, 6H), 0.04 (s, 3H).

**Step 4: *tert*-Butyl 7-chloro-1-[5-(hydroxymethyl)-3-thienyl]-3,4-dihydroisoquinoline-2(1*H*)-carboxylate (I-126).** To a solution of *tert*-butyl 1-[5-({*tert*-butyl(dimethyl)silyl}oxy)methyl]-3-thienyl]-7-chloro-3,4-dihydroisoquinoline-2(1*H*)-carboxylate (1.72 g, 3.48 mmol) in THF (15 mL) was added a 1M HCl solution (15 mL, 15 mmol). The reaction mixture was stirred at 40 °C for 2 h. The reaction was quenched with a saturated aqueous solution of NaHCO<sub>3</sub> (100 mL) and extracted with EtOAc (100 mL) three times. The combined organic layers were washed with brine, dried over Na<sub>2</sub>SO<sub>4</sub>, filtered, and concentrated. The residue was purified on silica gel to provide **I-126** (1.2 g, 91%). LCMS (FA): (M+1) 380.3.

**Step 5: *tert*-Butyl 7-chloro-1-(5-formyl-3-thienyl)-3,4-dihydroisoquinoline-2(1*H*)-carboxylate (I-127).** To a solution of *tert*-butyl 7-chloro-1-[5-(hydroxymethyl)-3-thienyl]-3,4-dihydroisoquinoline-2(1*H*)-carboxylate (980 mg, 2.6 mmol) in DCM (20 mL) was added Dess-Martin periodinane (1.64 g, 3.87 mmol) and the reaction mixture was stirred at rt for 30 min. The reaction was quenched by addition of a saturated aqueous solution of NaHCO<sub>3</sub> (60 mL) and extracted with DCM (60 mL) three times. The combined organic layers were washed with brine, dried over Na<sub>2</sub>SO<sub>4</sub>, filtered, and concentrated. The residue was purified on silica gel to provide **I-127** (860 mg, 88%). <sup>1</sup>H NMR (CDCl<sub>3</sub>) δ 9.88 (d, 1H, *J* = 1.2 Hz), 7.65 (s, 1H), 7.38 (s, 1H), 7.25 (dd, 1H, *J* = 8.2, 2.1 Hz), 7.18 (d, 1H, *J* = 8.2 Hz), 7.13 (s, 1H), 6.37 (s, 1H), 4.15 (d, 1H, *J* = 7.3 Hz), 3.11 (s, 1H), 2.96 (s, 1H), 2.75 (d, 1H, *J* = 16.1 Hz), 1.54 (s, 9H). LCMS (FA): (M+1) 378.3.

## Synthesis of 59

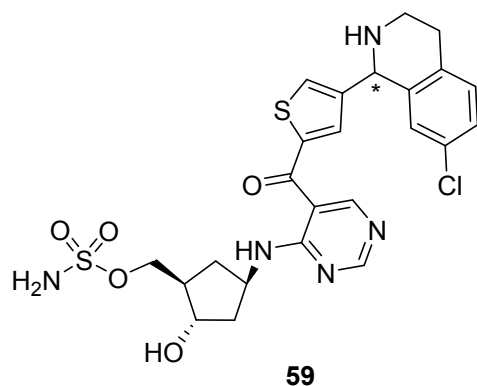

**[(1*R*,2*S*,4*R*)-4-{[5-({4-[(1*R*)-7-Chloro-1,2,3,4-tetrahydroisoquinolin-1-yl]-2-thienyl}carbonyl)pyrimidin-4-yl]amino}-2-hydroxycyclopentyl]methyl sulfamate or [(1*R*,2*S*,4*R*)-4-{[5-({4-[(1*S*)-7-Chloro-1,2,3,4-tetrahydroisoquinolin-1-yl]-2-thienyl}carbonyl)pyrimidin-4-yl]amino}-2-hydroxycyclopentyl]methyl sulfamate (**59**).**

Prepared by the method described for the preparation of **58** starting with intermediate **I-127**. The individual diastereomers were obtained using preparative scale chiral SFC. More active epimer **59** is reported. <sup>1</sup>H NMR (DMSO-*d*<sub>6</sub>) δ 8.68 (s, 1H), 8.64 (s, 1H), 8.27 (d, 1H, *J* = 7.6 Hz), 7.72 (s, 1H), 7.67 (d, 1H, *J* = 1.1 Hz), 7.48–7.12 (m, 4H), 6.87 (d, 1H, *J* = 1.6 Hz), 5.14 (s, 1H), 4.88 (d, 1H, *J* = 4.2 Hz), 4.77–4.63 (m, 1H), 4.09 (dd, 1H, *J* = 9.8, 6.0 Hz), 4.02–3.89 (m, 2H), 3.11–2.94 (m, 2H), 2.93–2.64 (m, 3H), 2.37–2.27 (m, 1H), 2.17–2.08 (m, 1H), 1.94 (ddd, 1H, *J* = 11.8, 7.4, 3.7 Hz), 1.82–1.70 (m, 1H), 1.28 (dt, 1H, *J* = 12.7, 9.2 Hz); LCMS (FA): *m/z* = 564.4 (M+H). HRMS *m/z* [M+H]<sup>+</sup> calcd for C<sub>24</sub>H<sub>27</sub>ClN<sub>5</sub>O<sub>5</sub>S<sub>2</sub> 564.1142, obsd 564.1148.

### Synthesis of Intermediate I-129

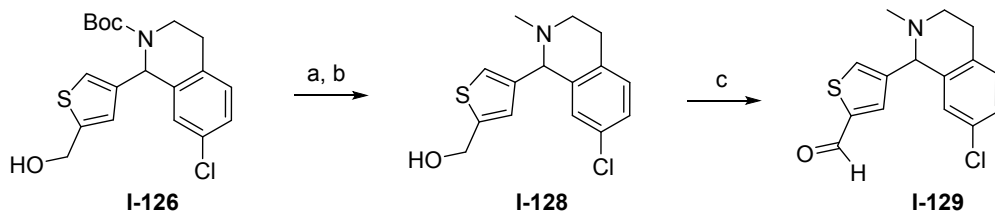

Reagents: (a) TFA, DCM, rt, 5 min; (b) 10 M of formaldehyde in water, NaBH(OAc)<sub>3</sub>, CH<sub>3</sub>CN, rt, 0.5 h, 88% for 2 steps; (c) Dess-Martin periodinane, rt, 0.5 h, 60%.

**Step 1: [4-(7-Chloro-2-methyl-1,2,3,4-tetrahydroisoquinolin-1-yl)-2-thienyl]methanol (**I-128**).** A solution of *tert*-butyl 7-chloro-1-[5-(hydroxymethyl)-3-thienyl]-3,4-dihydroisoquinoline-2(1*H*)-carboxylate (**I-126**, 220 mg, 0.58 mmol) in TFA (4.00 mL, 51.9 mmol) was stirred for 5 min at rt and then concentrated in vacuo. The residue was azeotroped with toluene twice and the residue was dried under high vacuum for 2 h. The residue was dissolved in CH<sub>3</sub>CN (5.0 mL), at which point was added 10 M of formaldehyde in water solution (0.24 mL, 2.90 mmol) followed by sodium triacetoxyborohydride (246 mg, 1.16 mmol) at rt, and the mixture was stirred for 30 min. The reaction was quenched by addition of saturated NaHCO<sub>3</sub> (60 mL) and extracted with EtOAc (60 mL) three times. The combined organic layers were dried over Na<sub>2</sub>SO<sub>4</sub>, filtered, and concentrated in vacuo. The residue was purified on silica gel to provide **I-128** (150 mg, 88%).

$^1\text{H}$  NMR ( $\text{CDCl}_3$ )  $\delta$  7.14–7.02 (m, 3H), 6.78–6.72 (m, 2H), 4.75 (s, 2H), 4.30 (s, 1H), 3.15–3.02 (m, 2H), 2.84–2.75 (m, 1H), 2.61 (s, 1H), 2.60–2.53 (m, 1H), 2.27 (s, 3H).

**Step 2: 4-(7-Chloro-2-methyl-1,2,3,4-tetrahydroisoquinolin-1-yl)thiophene-2-carbaldehyde (I-129).** To a solution of [4-(7-chloro-2-methyl-1,2,3,4-tetrahydroisoquinolin-1-yl)-2-thienyl]methanol (145 mg, 0.49 mmol) in DCM (3.0 mL) was added Dess-Martin periodinane (314 mg, 0.74 mmol) at rt, and the mixture was stirred for 30 min. The reaction was quenched by addition of saturated  $\text{NaHCO}_3$  (50 mL) and extracted with DCM (50 mL) three times. The combined organic layers were dried over  $\text{Na}_2\text{SO}_4$ , filtered, and concentrated in vacuo. The residue was purified on silica gel to yield **I-129** (80 mg, 60%).  $^1\text{H}$  NMR (MeOD)  $\delta$  9.83 (d, 1H,  $J$  = 1.2 Hz), 7.85 (s, 1H), 7.68 (d, 1H,  $J$  = 1.4 Hz), 7.21–7.12 (m, 2H), 6.73 (s, 1H), 4.61 (s, 1H), 3.15–3.05 (m, 2H), 2.95–2.85 (m, 1H), 2.72–2.62 (m, 1H), 2.29 (s, 3H). LCMS (FA):  $m/z$  = 292.3 (M+H).

## Synthesis of 60

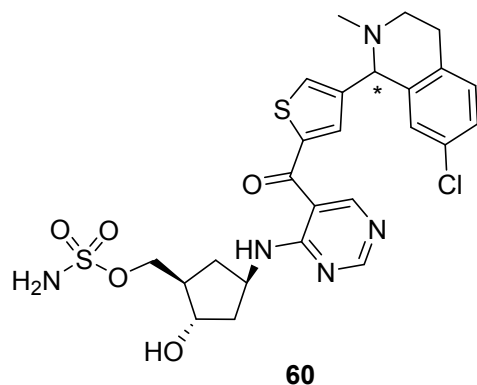

**[(1R,2S,4R)-4-{{5-({4-[(1R)-7-Chloro-2-methyl-1,2,3,4-tetrahydroisoquinolin-1-yl]-2-thienyl}carbonyl)pyrimidin-4-yl}amino}-2-hydroxycyclopentyl]methyl sulfamate or [(1R,2S,4R)-4-{{5-({4-[(1S)-7-Chloro-2-methyl-1,2,3,4-tetrahydroisoquinolin-1-yl]-2-thienyl}carbonyl)pyrimidin-4-yl}amino}-2-hydroxycyclopentyl]methyl sulfamate (60).**

Prepared by the method described for the preparation of **59** starting with intermediate **I-129**. The following alternative conditions were employed in the reaction scheme: Step 5: Silyl deprotection agent/solvent used was HCl/MeOH. The individual diastereomers were obtained using preparative scale chiral SFC. More active epimer **60** is reported.  $^1\text{H}$  NMR ( $\text{DMSO}-d_6$ )  $\delta$  8.62 (s, 1H), 8.59 (s, 1H), 8.22 (d, 1H,  $J$  = 7.5 Hz), 7.93 (d, 1H,  $J$  = 1.0 Hz), 7.50 (d, 1H,  $J$  = 1.1 Hz), 7.45–7.36 (br s, 2H), 7.19 (s, 2H), 6.79 (s, 1H), 4.87 (d, 1H,  $J$  = 4.5 Hz), 4.75–4.62 (m, 1H), 4.56 (s, 1H), 4.09 (dd, 1H,  $J$  = 9.7, 6.0 Hz), 4.00–3.89 (m, 2H), 3.06–2.91 (m, 2H), 2.87–2.73 (m, 1H), 2.56–2.52 (m, 1H), 2.36–2.27 (m, 1H), 2.21 (s, 3H), 2.17–2.06 (m, 1H), 1.98–1.88 (m, 1H), 1.73 (dt, 1H,  $J$  = 13.3, 6.9 Hz), 1.27 (dt, 1H,  $J$  = 12.3, 9.1 Hz); LCMS (FA):  $m/z$  = 578.4 (M+H). HRMS  $m/z$  [M+H] $^+$  calcd for  $\text{C}_{25}\text{H}_{29}\text{ClN}_5\text{O}_5\text{S}_2$  578.1299, obsd 578.1303.

## Synthesis of Intermediate I-135



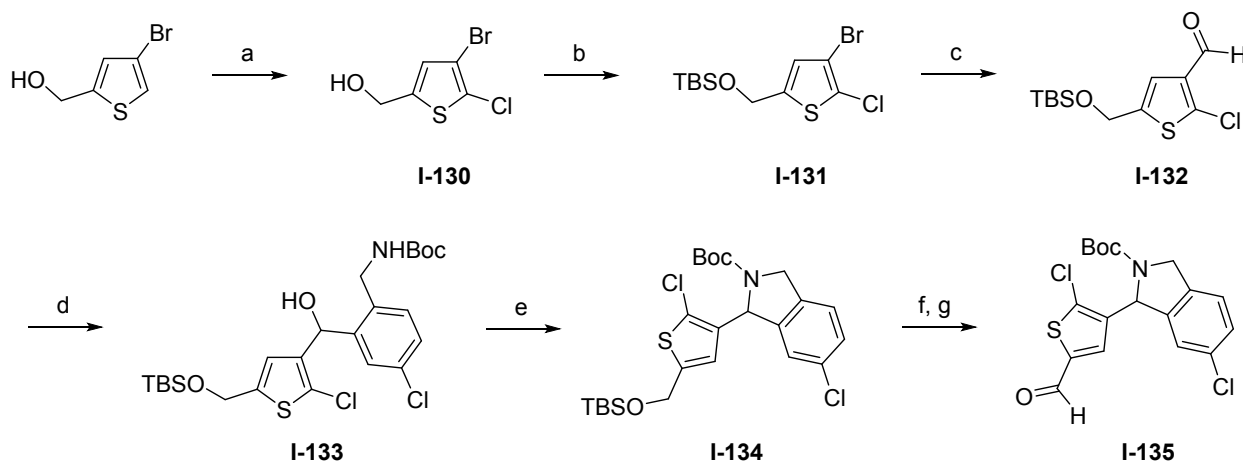

Reagents: (a) NCS, DMF, 60 °C, 3 h, 62%; (b) TBSCl, imidazole, DCM, rt, 2 h, 95%; (c) *n*-BuLi, DMF, THF, -78 °C, 15 min, 90%; (d) *tert*-butyl (2-bromo-4-chlorobenzyl)carbamate, *n*-BuLi, THF, -78 °C, 15 min, 43%; (e) MsCl, DIPEA, DCM, rt, 0.5 h, 60%; (f) TBAF, THF, rt, 15 min, 89%; (g) MnO<sub>2</sub>, DCM, rt, 20 h, 84%.

**Step 1: (4-Bromo-5-chloro-2-thienyl)methanol (I-130).** To a solution of (4-bromo-2-thienyl)methanol (2.5 g, 12.9 mmol) in DMF (5.0 mL) was added NCS (2.42 g, 18.1 mmol) and the reaction was heated to 60 °C and stirred for 3 h. Water was added and the mixture was extracted with EtOAc three times. The combined organic layers were dried over Na<sub>2</sub>SO<sub>4</sub>, filtered, and concentrated in vacuo. The residue was purified on silica gel to provide **I-130** (1.8 g, 62%). <sup>1</sup>H NMR (400 MHz, CDCl<sub>3</sub>) δ 6.82 (s, 1H), 4.73 (s, 2H), 2.00–1.91 (m, 1H).

**Step 2: [(4-Bromo-5-chloro-2-thienyl)methoxy](*tert*-butyl)dimethylsilane (I-131).** The title compound was prepared by the method described for the synthesis of intermediate **I-127** in Step 1 using intermediate **I-130**. <sup>1</sup>H NMR (CDCl<sub>3</sub>) δ 6.71 (s, 1H), 4.76 (d, 2H, *J* = 1.0 Hz), 0.93 (s, 9H), 0.11 (s, 6H).

**Step 3: 5-([*tert*-Butyl(dimethyl)silyl]oxy)methyl)-2-chlorothiophene-3-carbaldehyde (I-132).** To a solution of [(4-bromo-5-chloro-2-thienyl)methoxy](*tert*-butyl)dimethylsilane (4.0 g, 11.7 mmol) in THF (100 mL) cooled to -78 °C was added 2.50 M of *n*-BuLi in hexane (5.15 mL, 12.9 mmol) dropwise and mixture was stirred for 30 min at -78 °C. To this solution was then added DMF (1.36 mL, 17.6 mmol) and the reaction mixture was stirred for 15 min at -78 °C. The reaction was warmed to 0 °C and quenched by the addition of saturated NH<sub>4</sub>Cl (100 mL) and extracted with EtOAc (100 mL) three times. The combined organic layers were dried over Na<sub>2</sub>SO<sub>4</sub>, filtered, and concentrated in vacuo. The residue was purified on silica gel to provide **I-132** (3.06 g, 90%). <sup>1</sup>H NMR (400 MHz, CDCl<sub>3</sub>) δ 9.86 (s, 1H), 6.99 (s, 1H), 4.67 (d, 2H, *J* = 1.0 Hz) 0.82 (s, 9H), 0.00 (s, 6H).

**Step 4: *tert*-Butyl (2-{[5-([*tert*-butyl(dimethyl)silyl]oxy)methyl]-2-chloro-3-thienyl}(hydroxy)methyl)-4-chlorobenzyl)carbamate (I-133).** To a solution of *tert*-butyl (2-bromo-4-chlorobenzyl)carbamate (700 mg, 2.18 mmol) in THF (20 mL) cooled to -78 °C was added 2.50 M of *n*-BuLi in hexane (1.75 mL, 4.37 mmol) dropwise and mixture was stirred for 20 min at -78 °C. To this solution was then added 5-([*tert*-butyl(dimethyl)silyl]oxy)methyl)-2-chlorothiophene-3-carbaldehyde (605 mg, 2.08 mmol) in THF (5.0 mL) and the reaction mixture

was stirred for 15 min at -78 °C. The reaction was quenched by the addition of saturated NH<sub>4</sub>Cl (100 mL) and extracted with EtOAc (100 mL) three times. The combined organic layers were dried over Na<sub>2</sub>SO<sub>4</sub>, filtered, and concentrated in vacuo. The residue was purified on silica gel to provide **I-133** (501 mg, 43%). LCMS (FA):  $m/z$  = 554.3 (M+Na).

**Step 5: *tert*-Butyl 1-[5-({*tert*-butyl(dimethyl)silyl}oxy)methyl]-2-chloro-3-thienyl]-6-chloro-1,3-dihydro-2*H*-isoindole-2-carboxylate (**I-134**).** To a solution of *tert*-butyl (2-{{5-({*tert*-butyl(dimethyl)silyl}oxy)methyl}-2-chloro-3-thienyl}-(hydroxy)methyl)-4-chlorobenzyl)carbamate (475 mg, 0.89 mmol) in DCM (10 mL) and *N,N*-diisopropylethylamine (0.39 mL, 2.23 mmol) was added MsCl (0.073 mL, 0.94 mmol) and the reaction mixture was stirred for 30 min at rt. The reaction was quenched by the addition of water and extracted with EtOAc three times. The combined organic layers were dried over Na<sub>2</sub>SO<sub>4</sub>, filtered, and concentrated in vacuo. The residue was purified on silica gel to provide **I-134** (302 mg, 60%).

**Step 6: *tert*-Butyl 6-chloro-1-(2-chloro-5-formyl-3-thienyl)-1,3-dihydro-2*H*-isoindole-2-carboxylate (**I-135**).** To a solution of *tert*-butyl 1-[5-({*tert*-butyl(dimethyl)silyl}oxy)methyl]-2-chloro-3-thienyl]-6-chloro-1,3-dihydro-2*H*-isoindole-2-carboxylate (295 mg, 0.57 mmol) in THF (5.0 mL) was added a solution of TBAF hydrate (208 mg, 0.745 mmol) in THF (2.0 mL) at rt, and the mixture was stirred for 15 min. The reaction was quenched by addition of water and extracted with EtOAc three times. The combined organic layers were dried over Na<sub>2</sub>SO<sub>4</sub>, filtered, and concentrated in vacuo. The residue was purified on silica gel to provide the primary alcohol (205 mg, 89%). LCMS (FA):  $m/z$  = 422.0 (M+Na). To a flask containing the product from the above reaction (205 mg, 0.51 mmol) in DCM (20 mL) was added MnO<sub>2</sub> (445 mg, 5.12 mmol) at rt, and the mixture was stirred for 20 h. The reaction was filtered through a celite pad and the residual solid was rinsed with DCM several times. The filtrate was concentrated in vacuo and the residue was purified on silica gel to provide **I-135** as a colorless solid (171 mg, 84%). LCMS (FA):  $m/z$  = 398.0 (M+H).

## Synthesis of 61

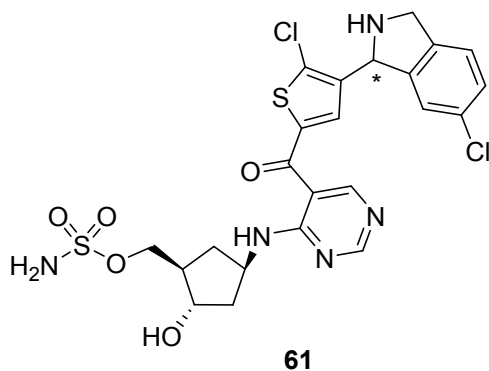

[(1*R*,2*S*,4*R*)-4-{{5-({5-Chloro-4-[(1*R*)-6-chloro-2,3-dihydro-1*H*-isoindol-1-yl]-2-thienyl}carbonyl)pyrimidin-4-yl}amino}-2-hydroxycyclopentyl]methyl sulfamate or [(1*R*,2*S*,4*R*)-4-{{5-({5-Chloro-4-[(1*S*)-6-chloro-2,3-dihydro-1*H*-isoindol-1-yl]-2-thienyl}carbonyl)pyrimidin-4-yl}amino}-2-hydroxycyclopentyl]methyl sulfamate (**62**).

Prepared by the method described for the preparation of **58** starting with intermediate **I-135**. The individual diastereomers were obtained using preparative scale chiral HPLC. More active epimer **61** is reported.  $^1\text{H}$  NMR ( $\text{DMSO}-d_6$ )  $\delta$  8.60 (d, 2H,  $J = 6.1$  Hz), 8.14 (d, 1H,  $J = 7.5$  Hz), 7.51–7.38 (m, 3H), 7.36 (d, 1H,  $J = 8.1$  Hz), 7.30 (dd, 1H,  $J = 8.1, 1.6$  Hz), 7.04 (s, 1H), 5.59 (s, 1H), 4.94–4.81 (br s, 1H), 4.74–4.61 (m, 1H), 4.30–4.14 (m, 2H), 4.13–4.03 (m, 1H), 4.00–3.86 (m, 2H), 3.80–3.56 (br s, 1H), 2.36–2.20 (m, 1H), 2.15–2.08 (m, 1H), 2.00–1.86 (m, 1H), 1.80–1.69 (m, 1H), 1.31–1.18 (m, 1H); LCMS (FA):  $m/z = 584.2$  (M+H). HRMS  $m/z$   $[\text{M}+\text{H}]^+$  calcd for  $\text{C}_{23}\text{H}_{24}\text{Cl}_2\text{N}_5\text{O}_5\text{S}_2$  584.0596, obsd 584.0602.

## HPLC traces of Compounds

Compound purity was determined by analysis of the diode array UV trace of an LC-MS spectrum using the following procedure: compounds were dissolved in DMSO, methanol, or acetonitrile, and the solutions were analyzed using a Hewlett-Packard HP1100 or Agilent 1100 Series LC system connected to a Micromass mass spectrometer using reverse phase C18 columns. One of two gradients was used to elute the compounds: either a formic acid (FA) gradient (acetonitrile containing 0-100% 0.1% formic acid in water) or an ammonium acetate (AA) gradient (acetonitrile containing 0-100% 10 mM ammonium acetate in water). All compounds were determined to be >95% pure unless otherwise noted.

### HPLC Chromatogram

Compound **2**: Method (FA), Purity: 100%

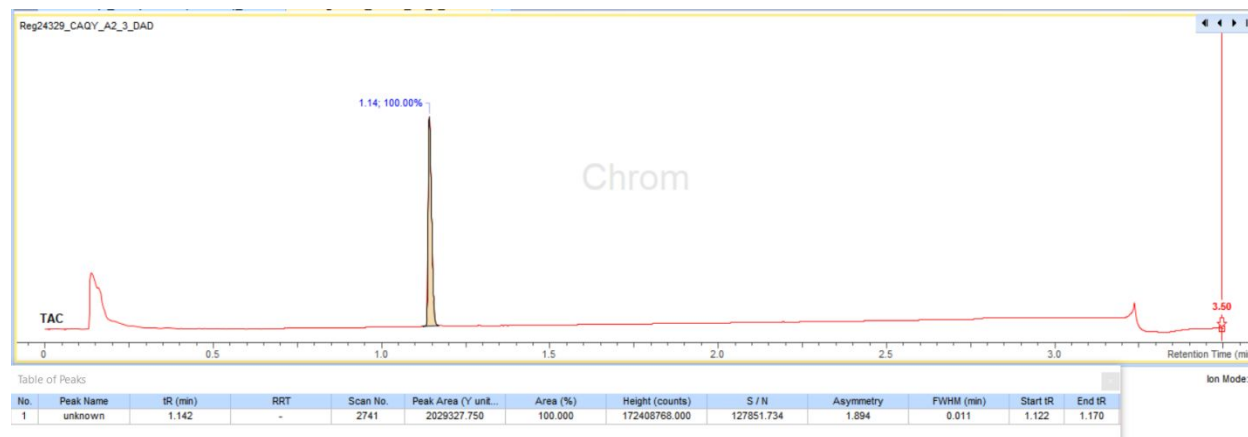

### HPLC Chromatogram

Compound **3**: Method (FA), Purity: 99.5%

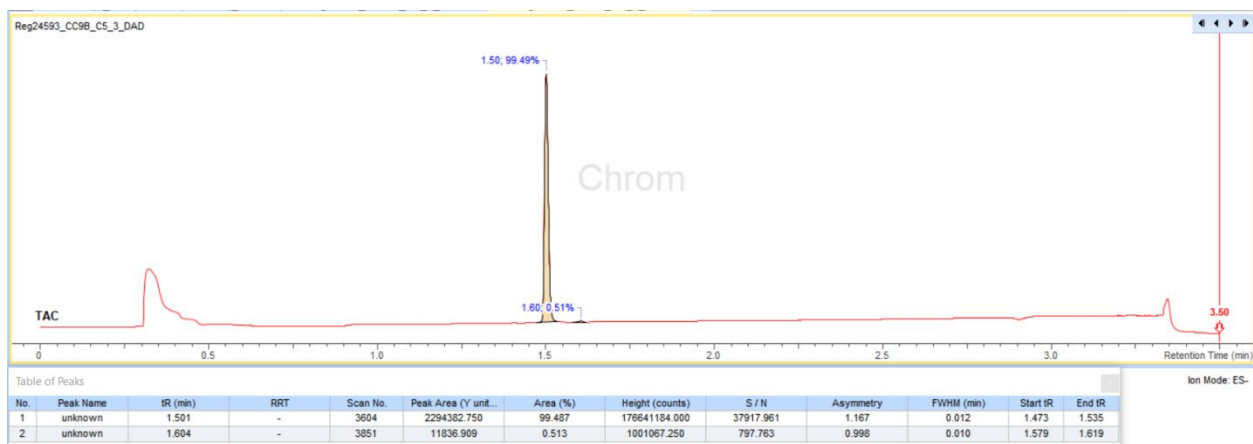

## HPLC Chromatogram

Compound **4**: Method (FA), Purity: 92.5%

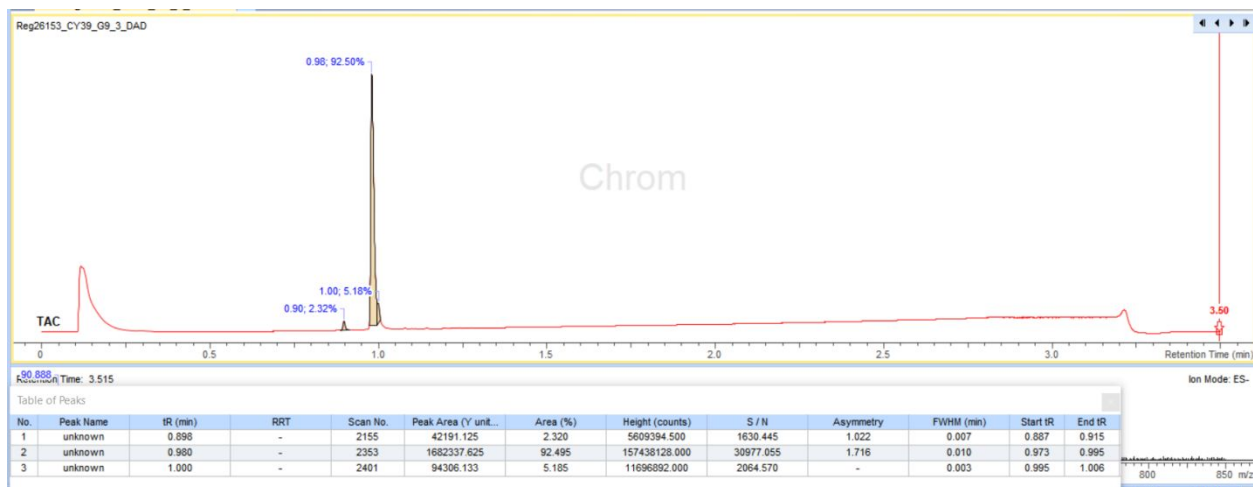

## HPLC Chromatogram

Compound **5**: Method (FA), Purity: 99.0%

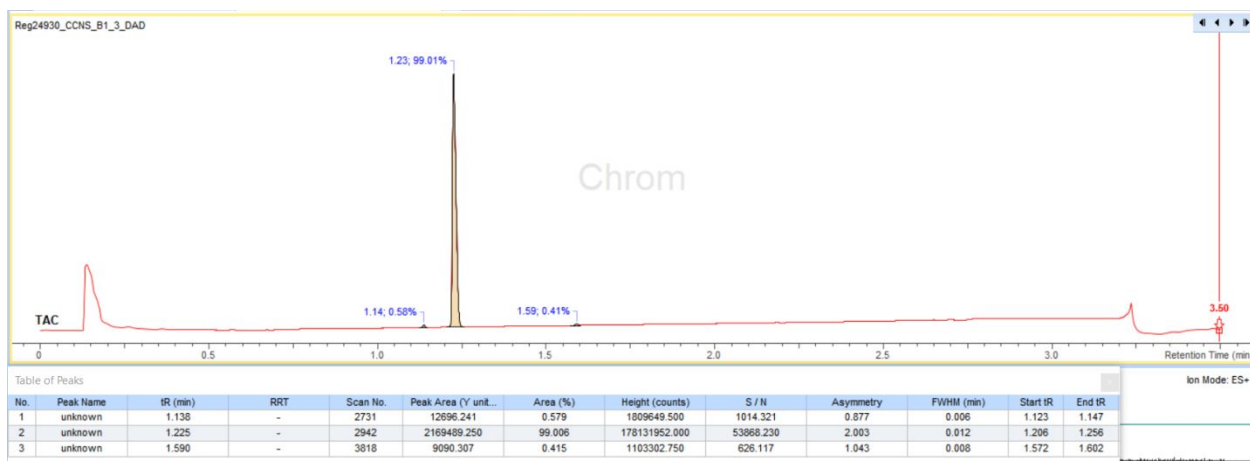

HPLC Chromatogram

Compound **6**: Method (FA), Purity: 97.6%

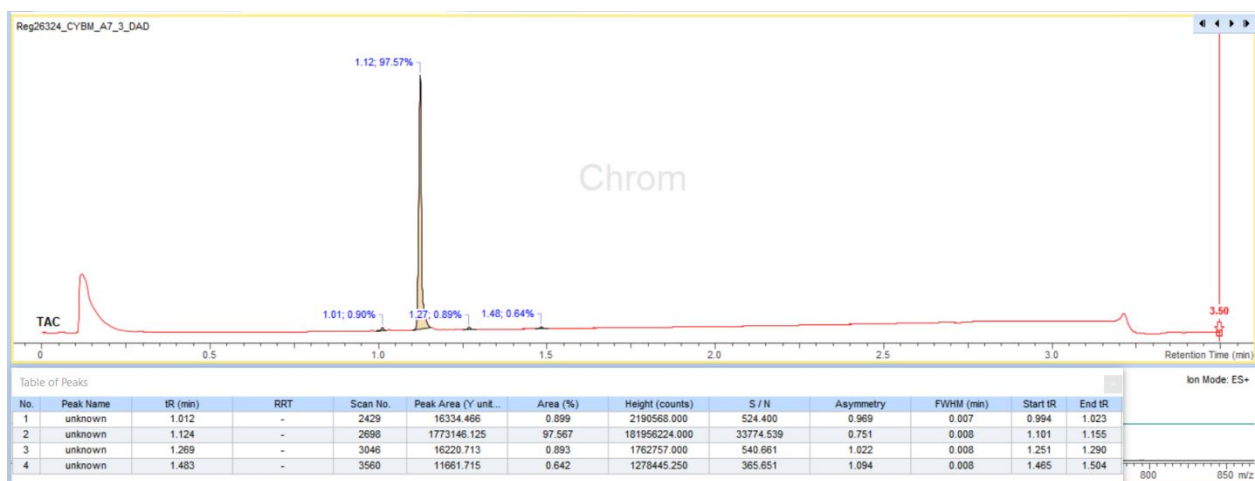

HPLC Chromatogram

Compound **7**: Method (FA), Purity: 97.4%

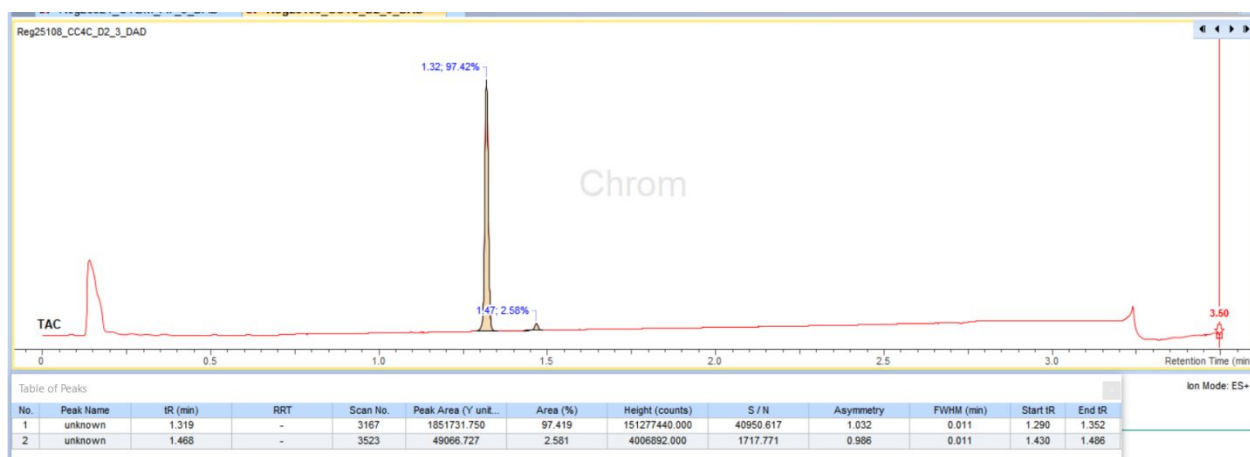

## HPLC Chromatogram

Compound **8**: Method (FA), Purity: 97.2%

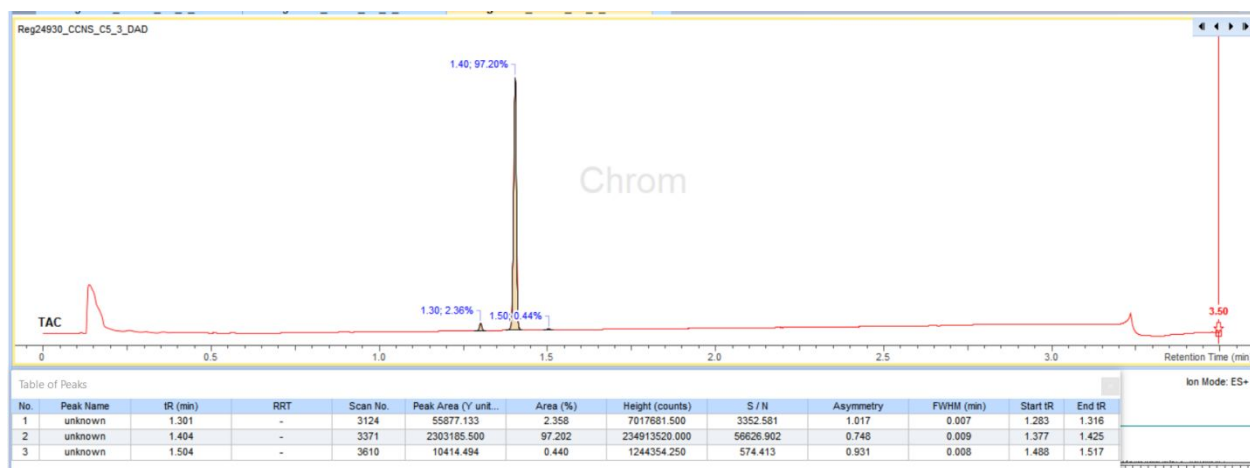

## HPLC Chromatogram

Compound **9**: Method (FA), Purity: 96.1%

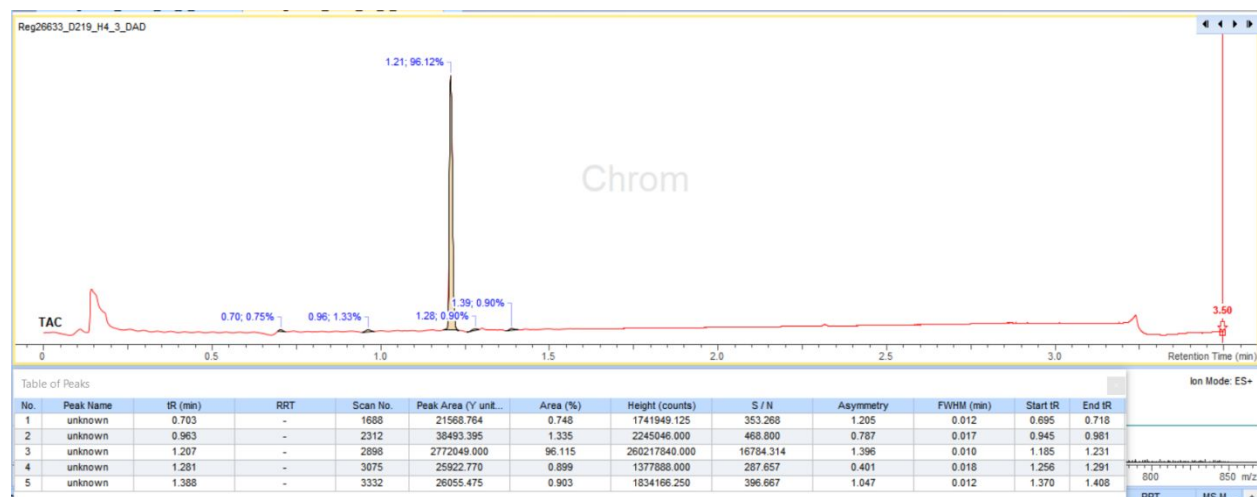

## HPLC Chromatogram

Compound **10**: Method (FA), Purity: 97.6%

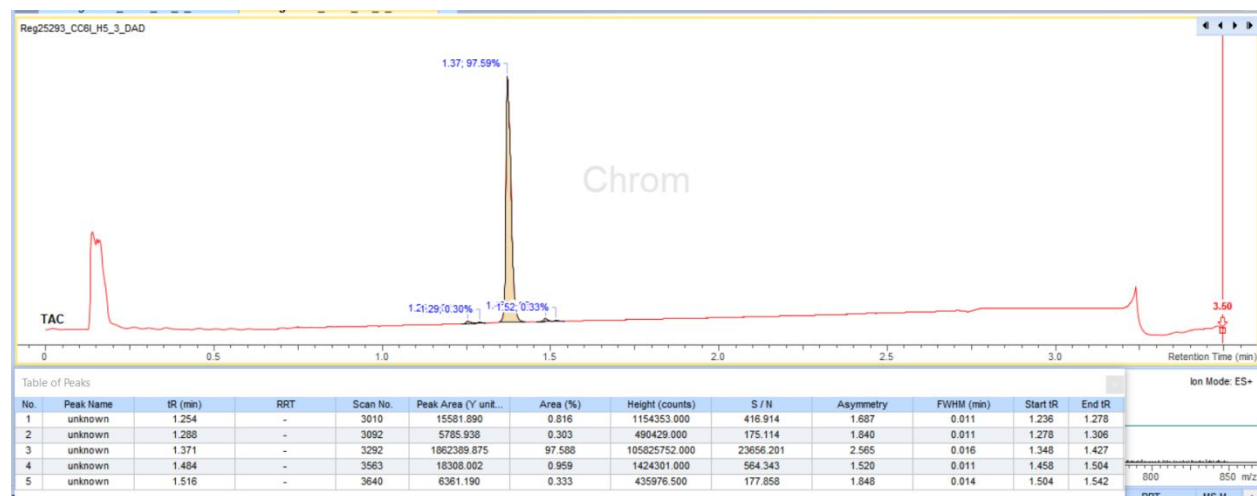

## HPLC Chromatogram

Compound **12**: Method (FA), Purity: 98.2%

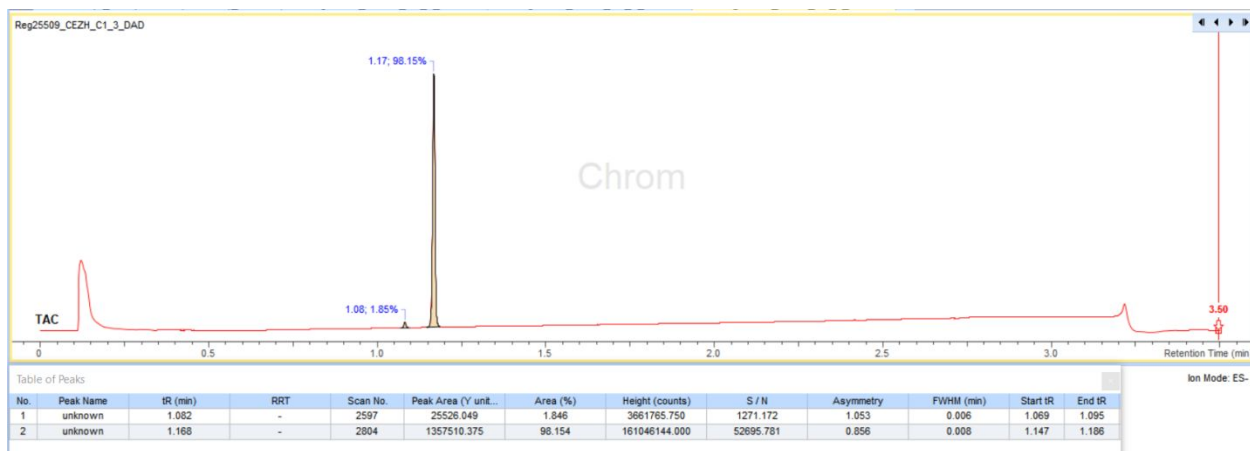

HPLC Chromatogram

Compound **ML-792**: Method (FA), Purity: 100%

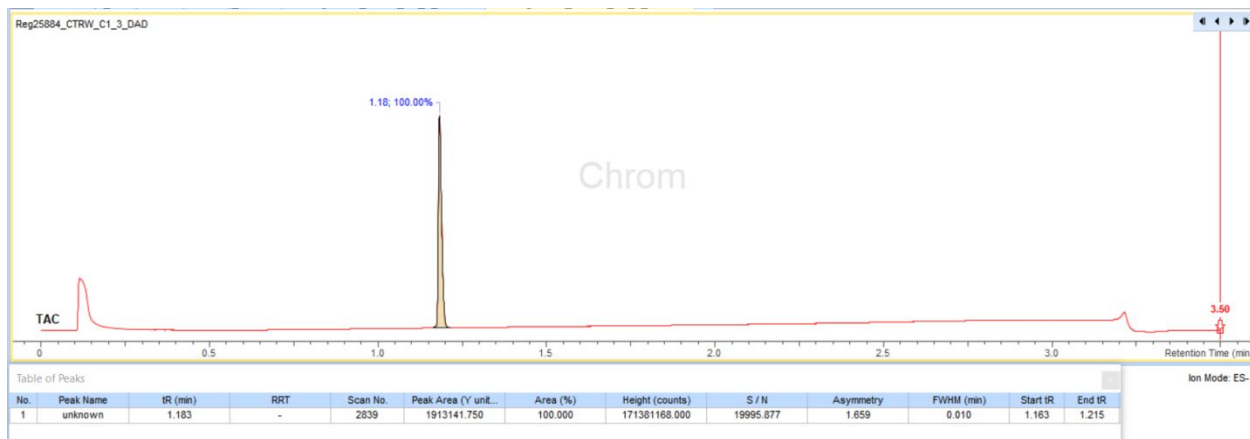

HPLC Chromatogram

Compound **15**: Method (FA), Purity: 99.3%



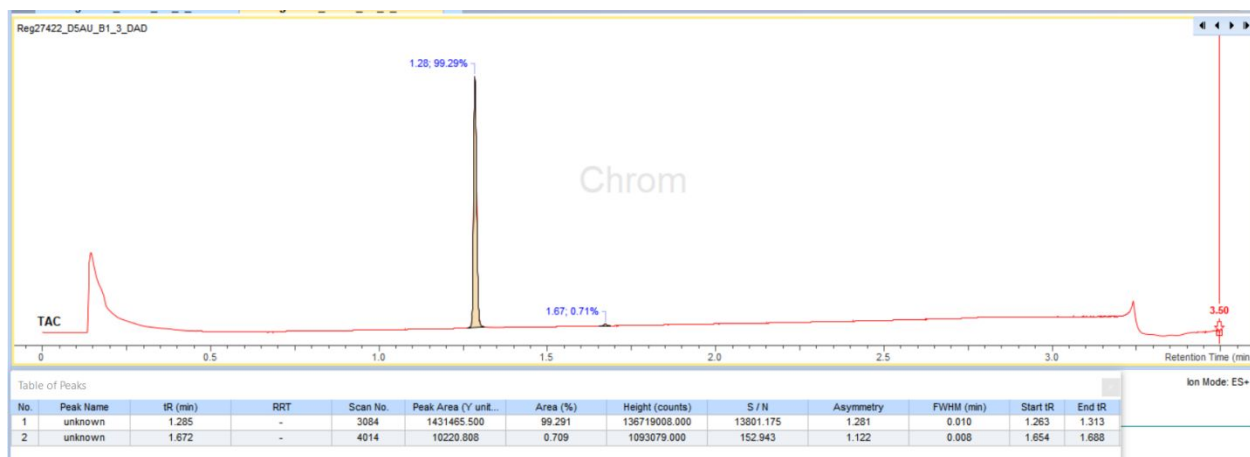

## HPLC Chromatogram

Compound **16**: Method (FA), Purity: 99.6%

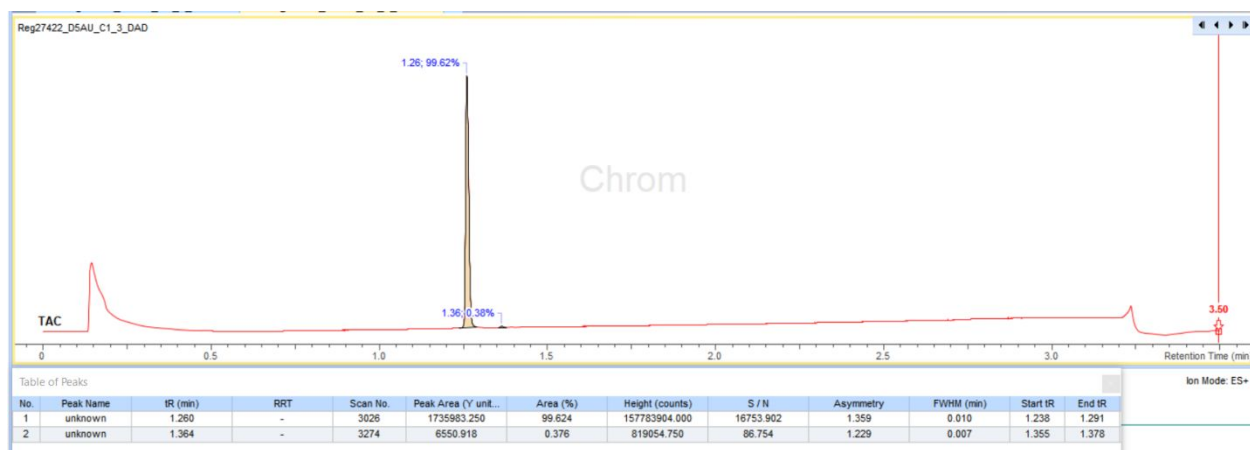

## HPLC Chromatogram

Compound **17**: Method (FA), Purity: 99.0%

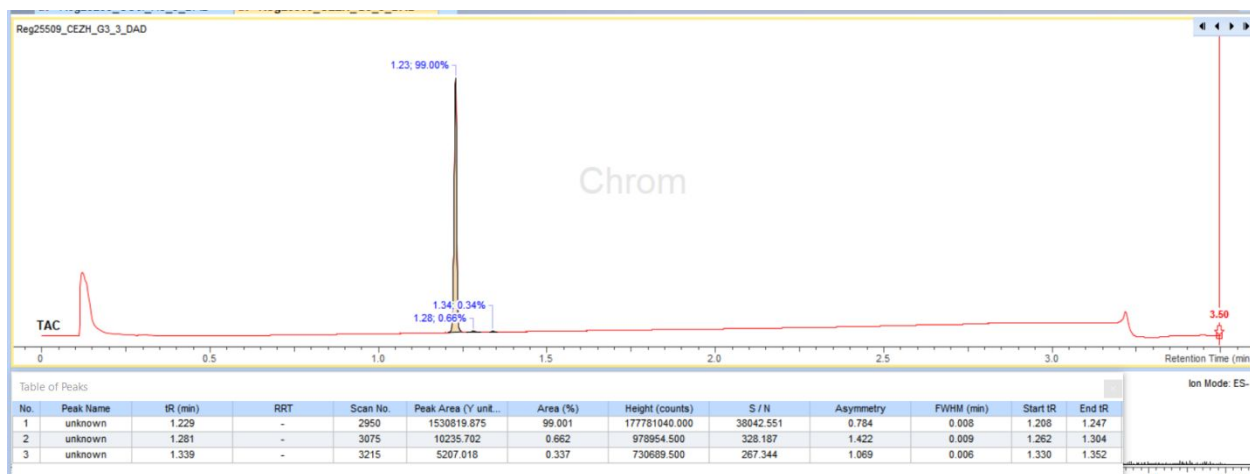

## HPLC Chromatogram

Compound **18**: Method (FA), Purity: 97.1%

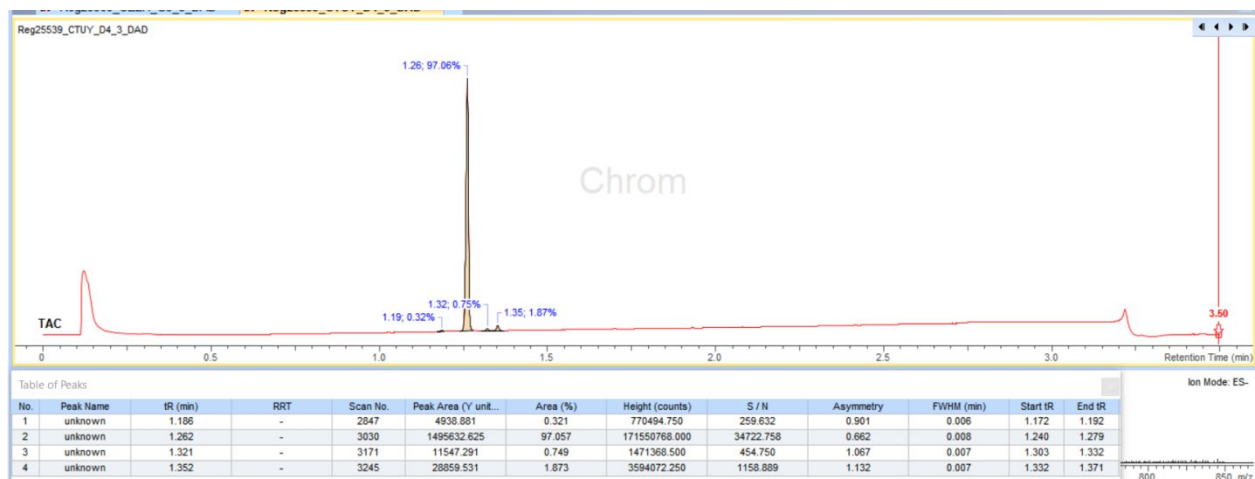

## HPLC Chromatogram

Compound **19**: Method (FA), Purity: 97.3%

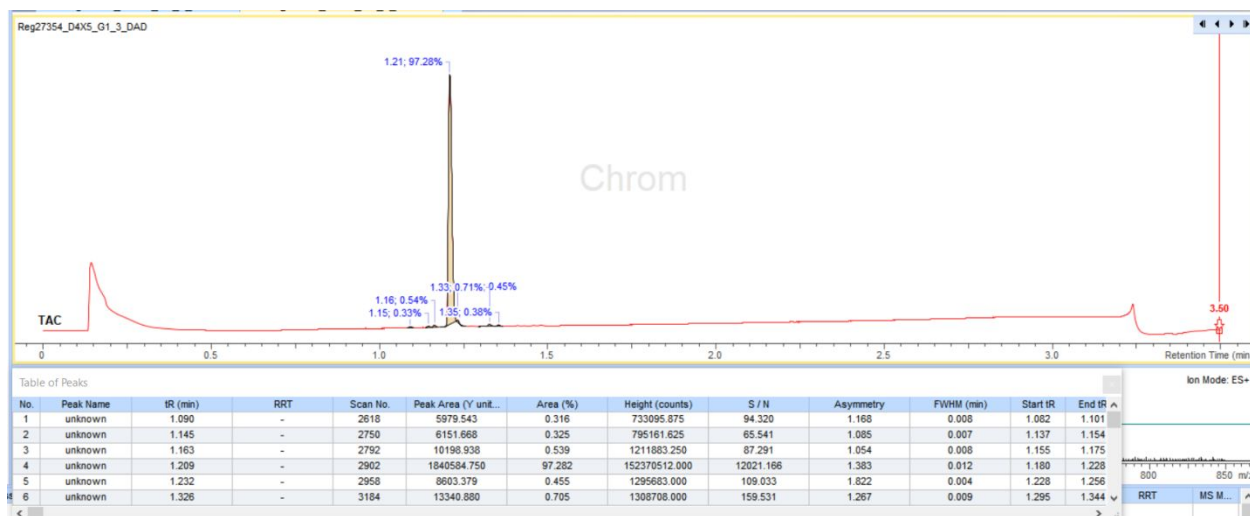

HPLC Chromatogram

Compound **21**: Method (FA), Purity: 96.4%

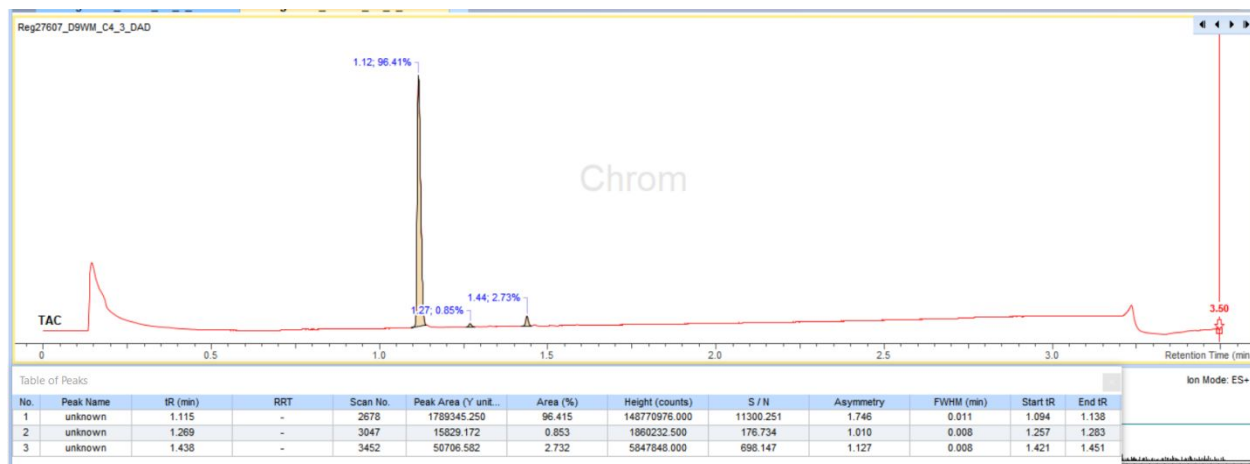

HPLC Chromatogram

Compound **22**: Method (FA), Purity: 99.8%

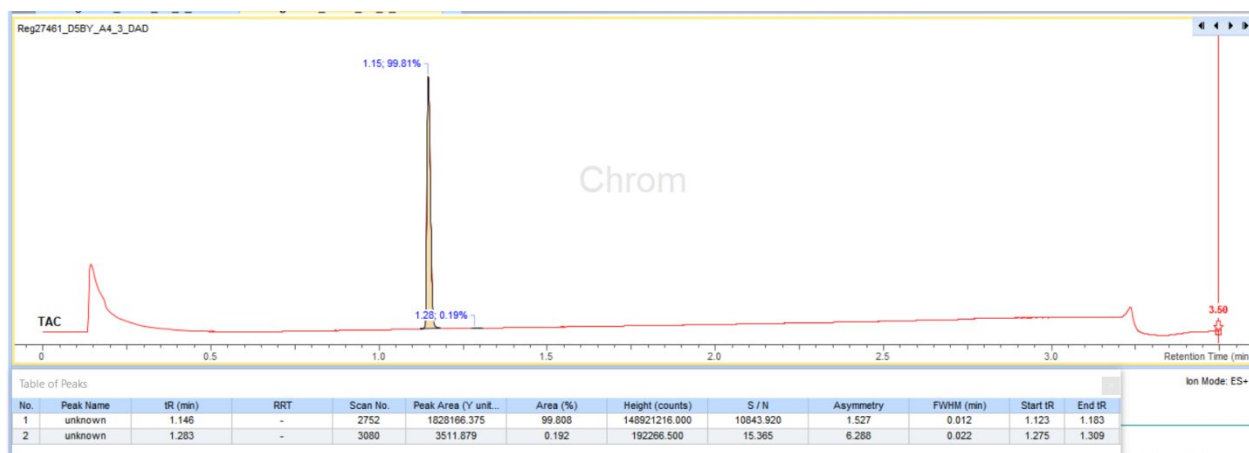

## HPLC Chromatogram

Compound **23**: Method (FA), Purity: 98.3%

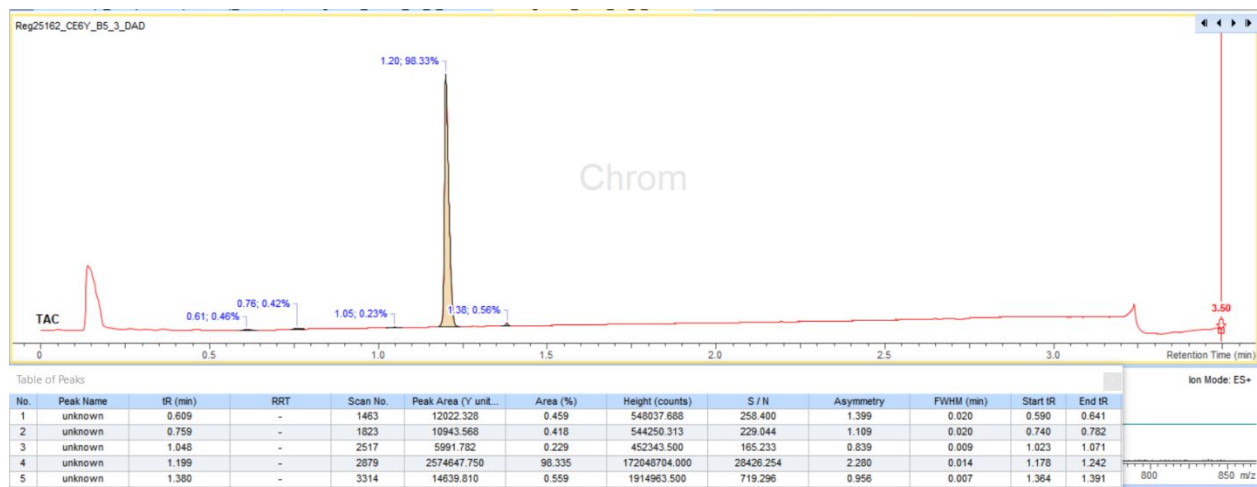

## HPLC Chromatogram

Compound **24**: Method (FA), Purity: 99.4%

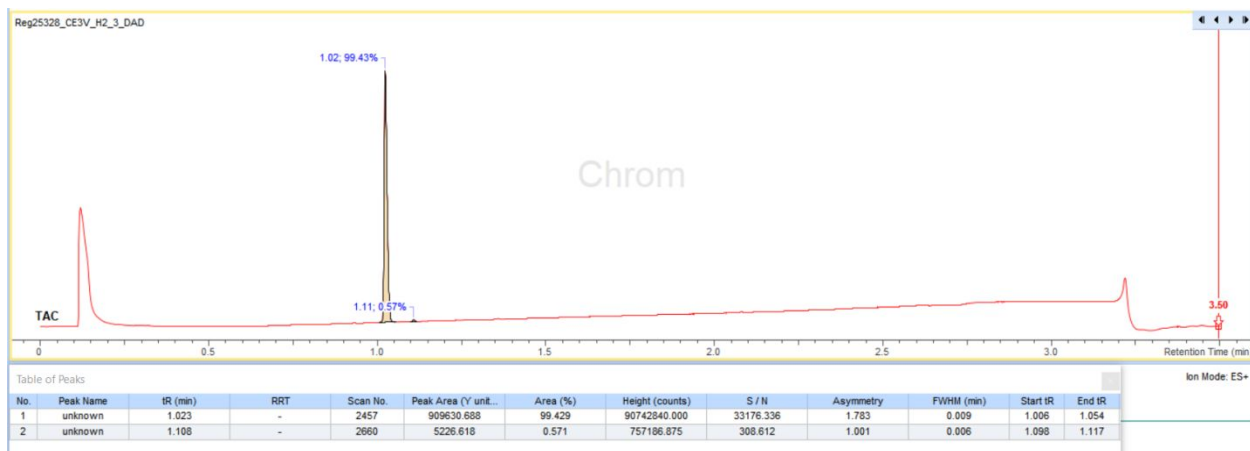

## HPLC Chromatogram

Compound **25**: Method (FA), Purity: 95.3%

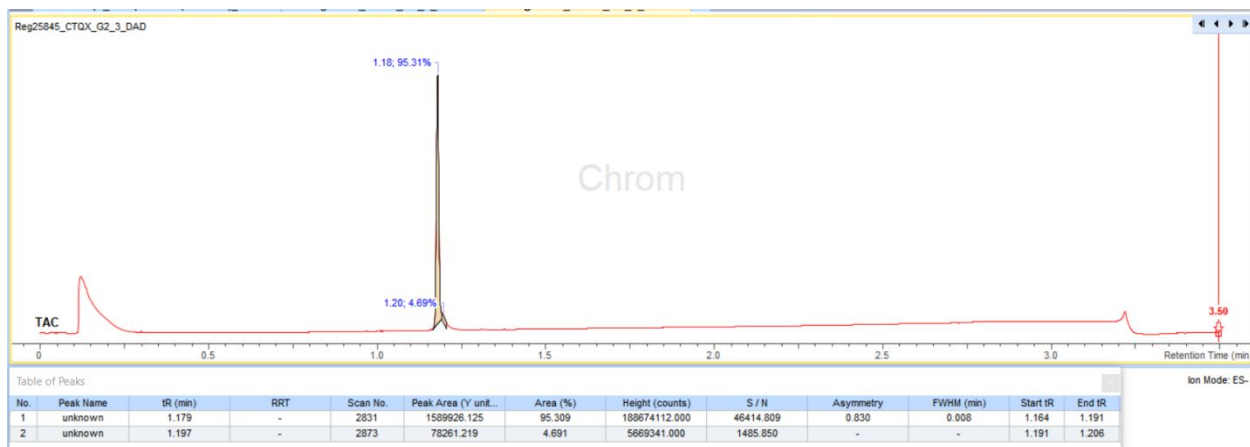

## HPLC Chromatogram

Compound **26**: Method (FA), Purity: 98.9%

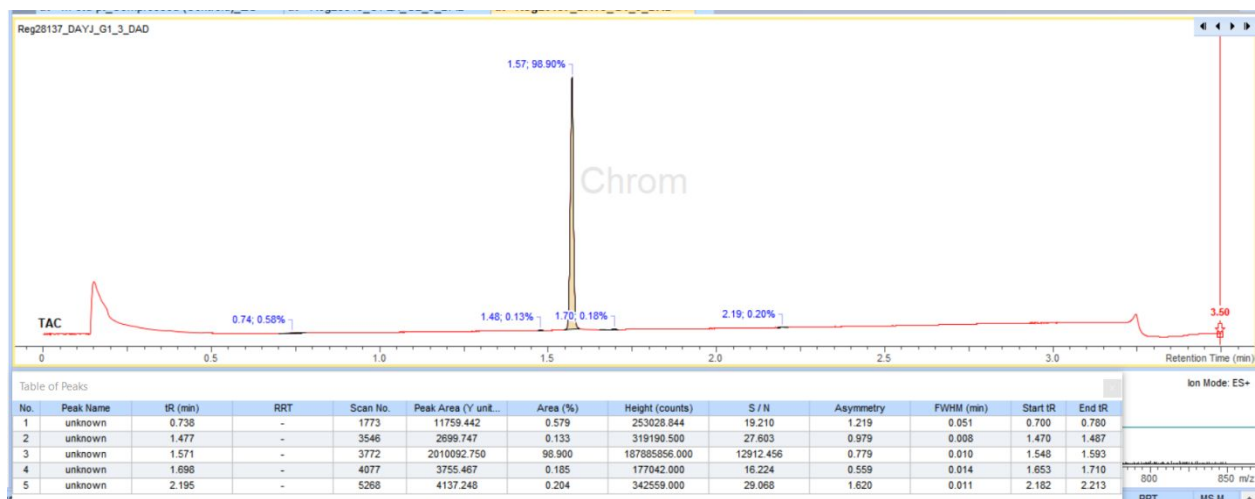

## HPLC Chromatogram

Compound **28**: Method (FA), Purity: 95.3%

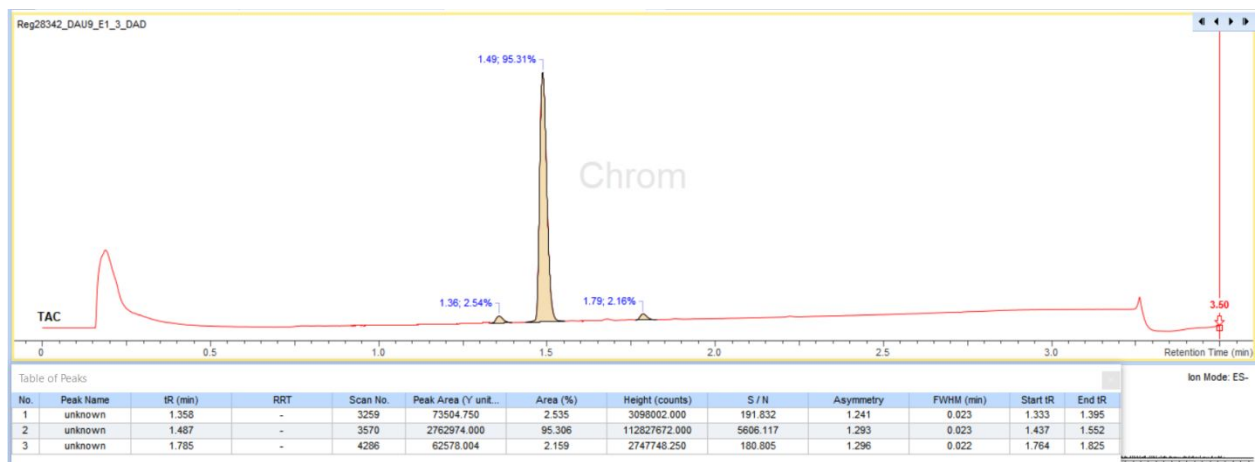

## HPLC Chromatogram

Compound **29**: Method (FA), Purity: 99.2%

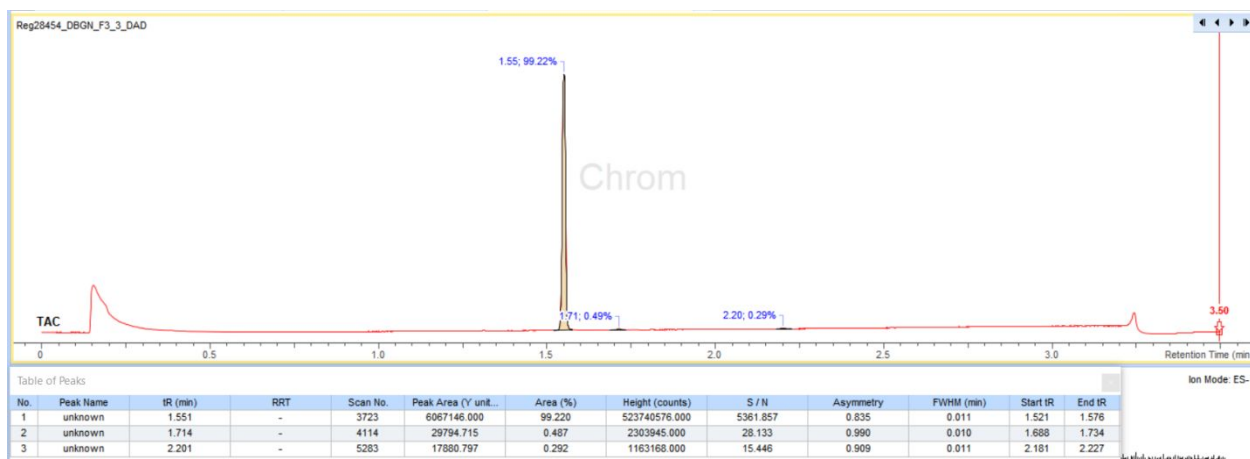

## HPLC Chromatogram

Compound **30**: Method (FA), Purity: 96.0%

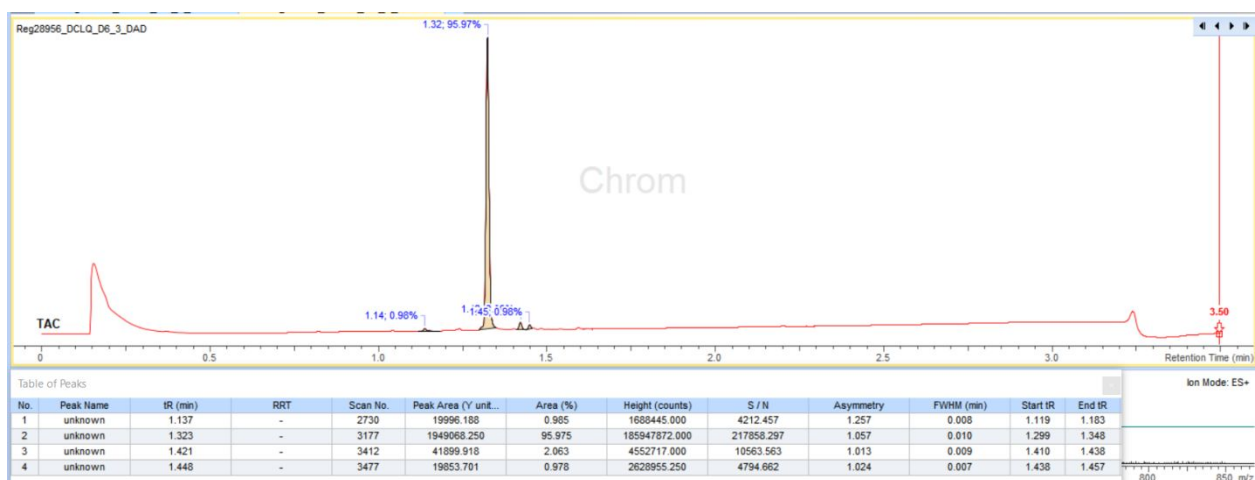

## HPLC Chromatogram

Compound **31**: Method (FA), Purity: 95.1%

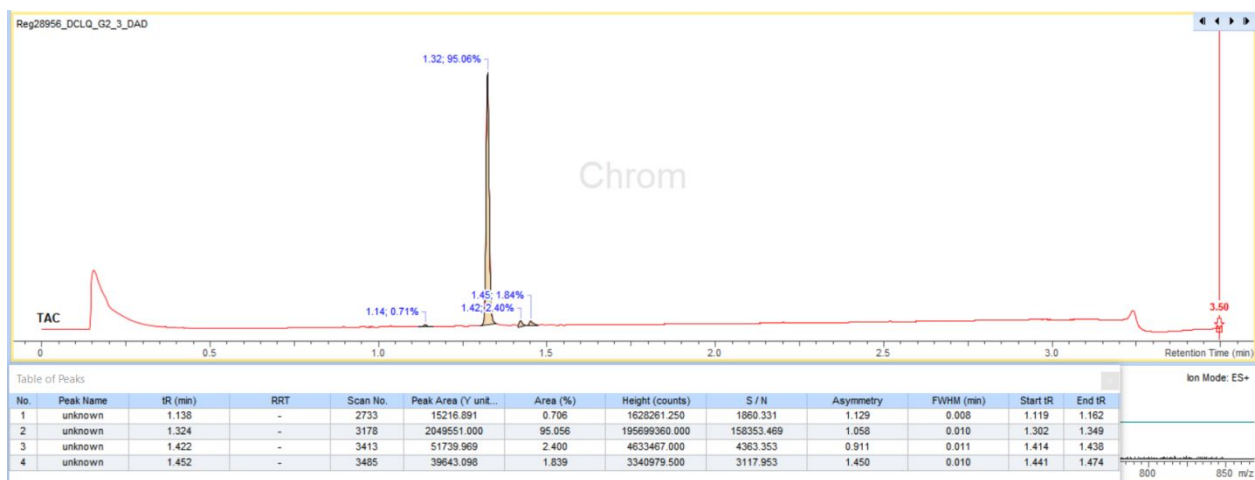

## HPLC Chromatogram

Compound **32**: Method (FA), Purity: 94.9%

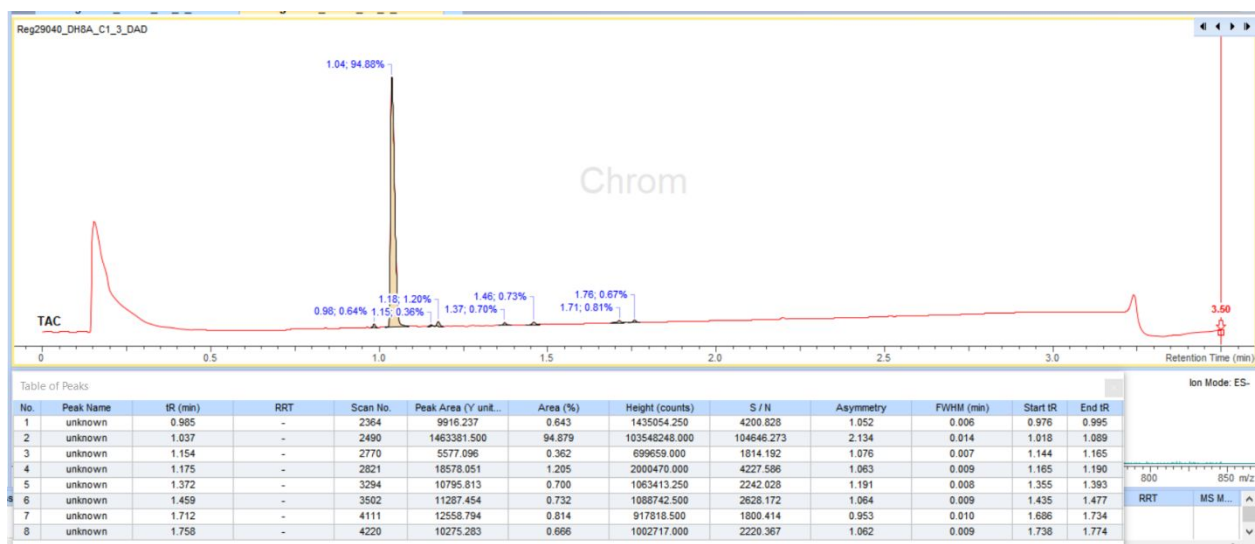

## HPLC Chromatogram

Compound **33**: Method (FA), Purity: 97.3%



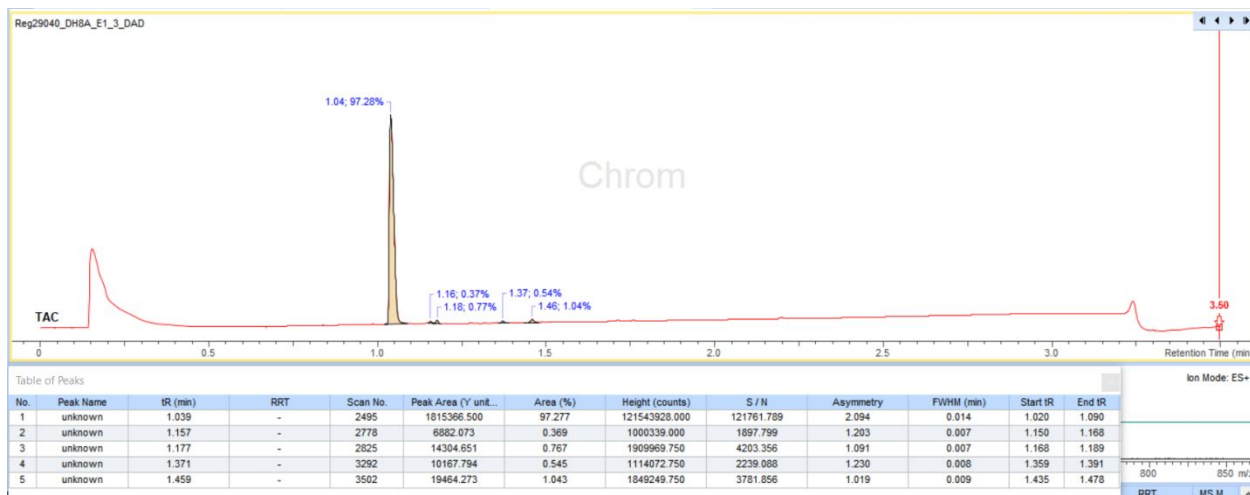

HPLC Chromatogram

Compound **34**: Method (FA), Purity: 95.7%

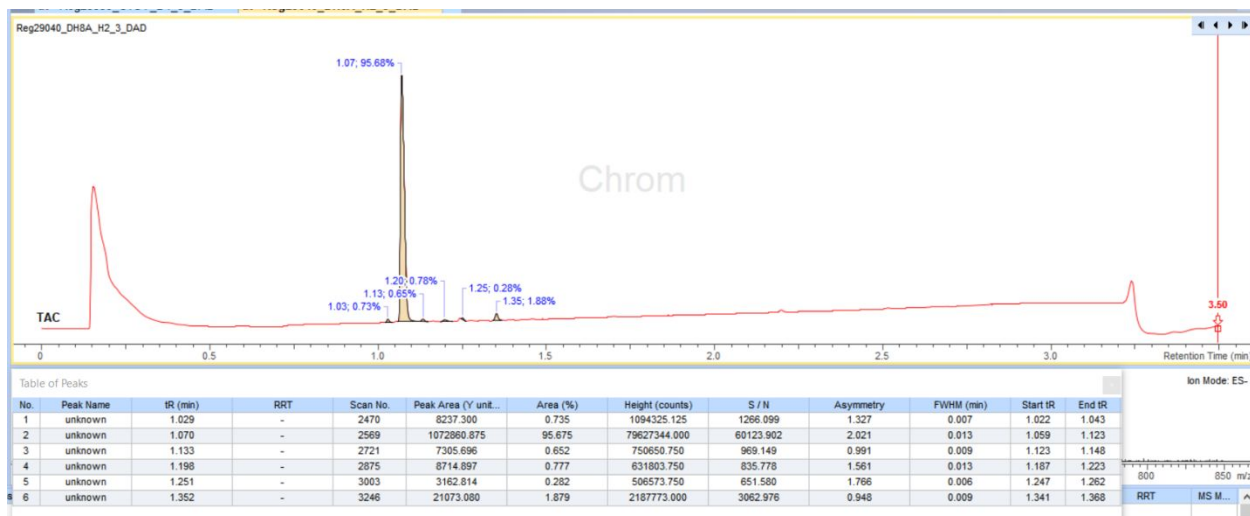

HPLC Chromatogram

Compound **35**: Method (AA), Purity: 96.0%

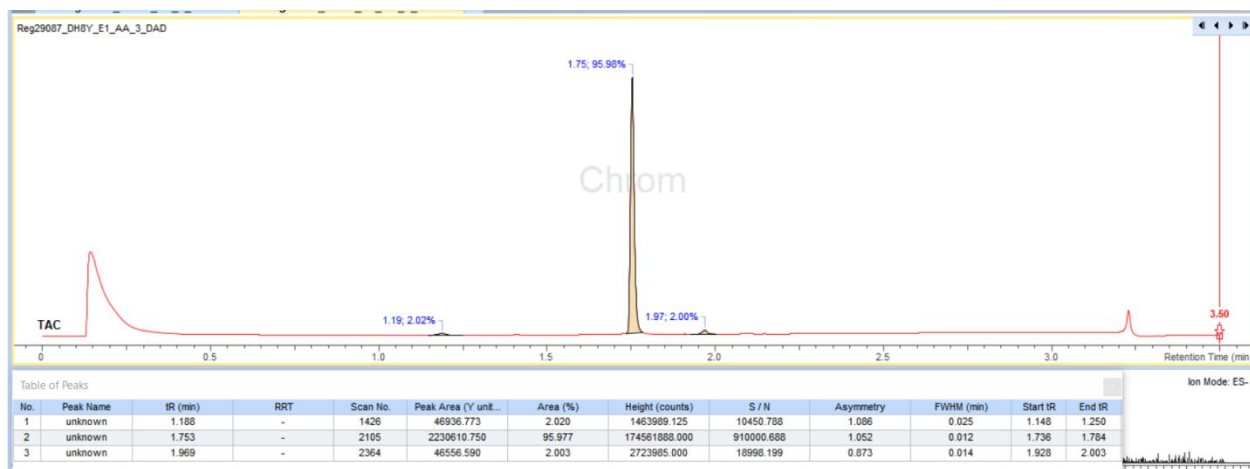

## HPLC Chromatogram

Compound **36**: Method (FA), Purity: 99.2%

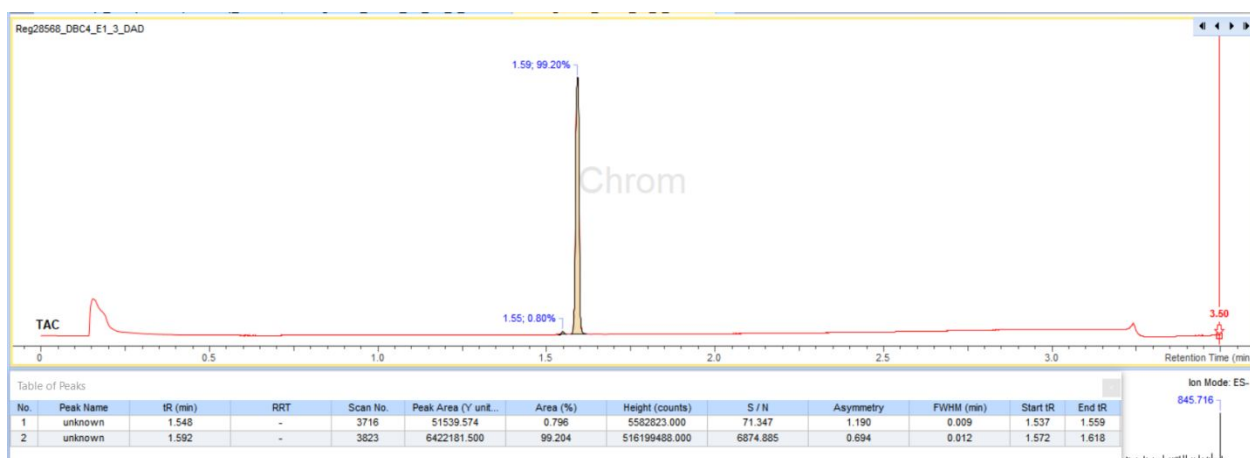

## HPLC Chromatogram

Compound **37**: Method (FA), Purity: 99.8%

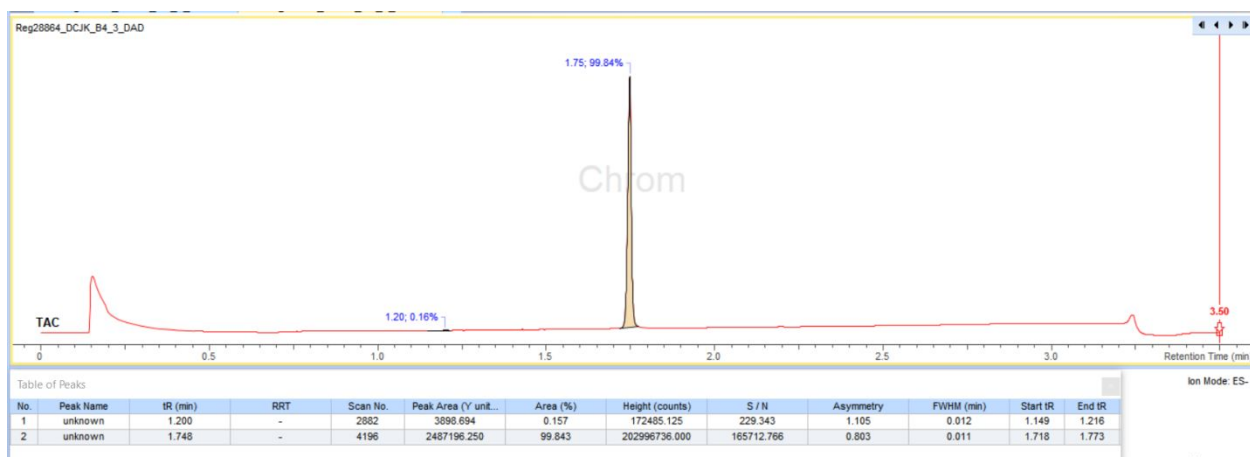

## HPLC Chromatogram

Compound **38**: Method (FA), Purity: 99.6%

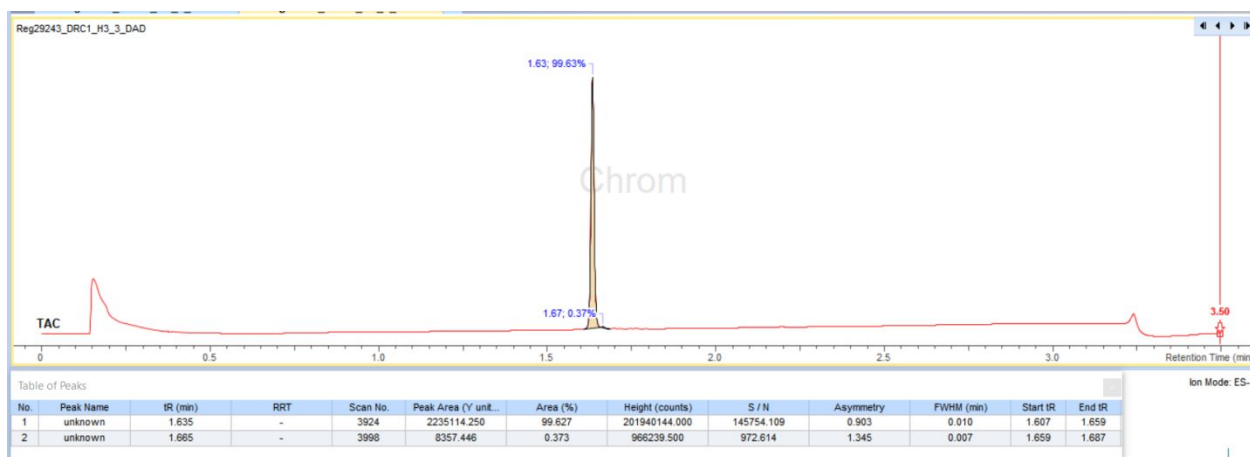

## HPLC Chromatogram

Compound **39**: Method (FA), Purity: 98.5%

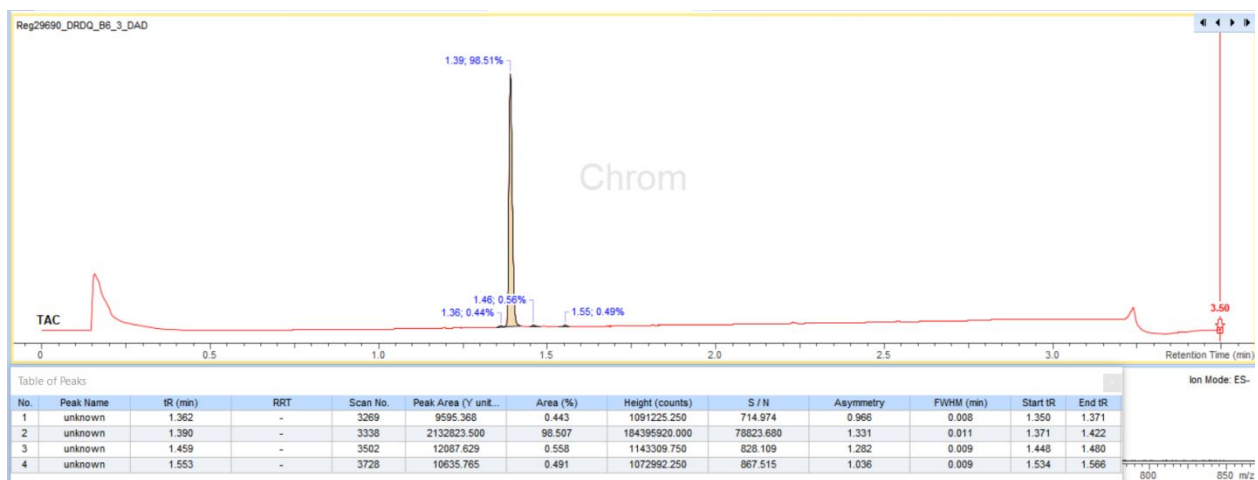

## HPLC Chromatogram

Compound **40**: Method (FA), Purity: 99.7%

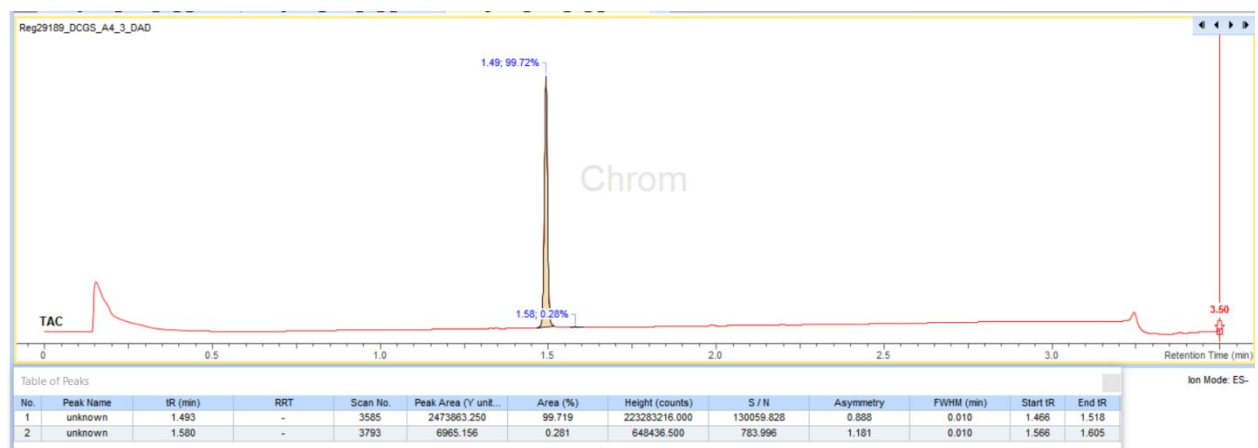

## HPLC Chromatogram

Compound **41**: Method (FA), Purity: 95.1%

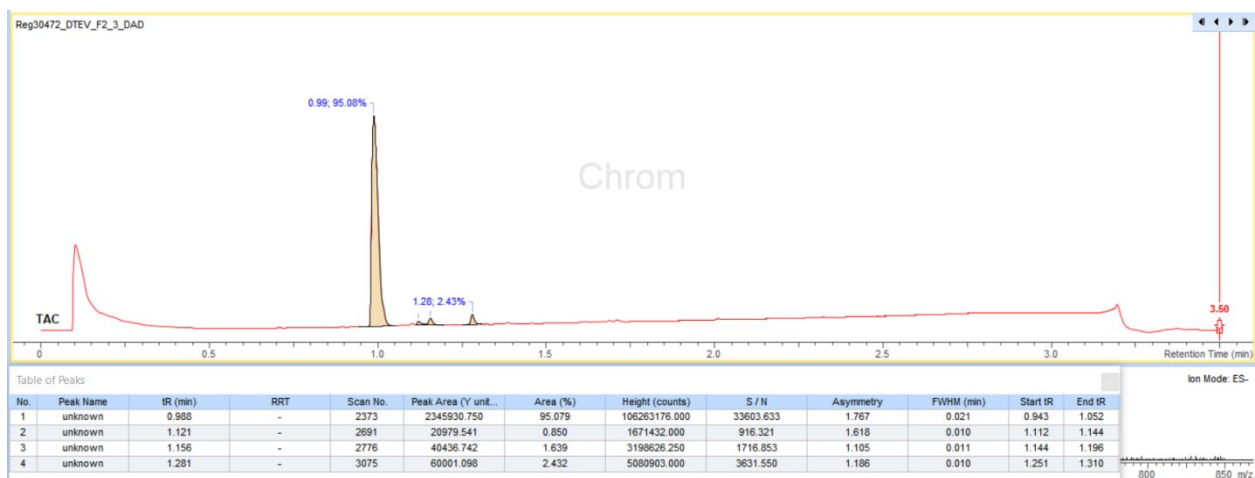

## HPLC Chromatogram

Compound **42**: Method (AA), Purity: 95.4%

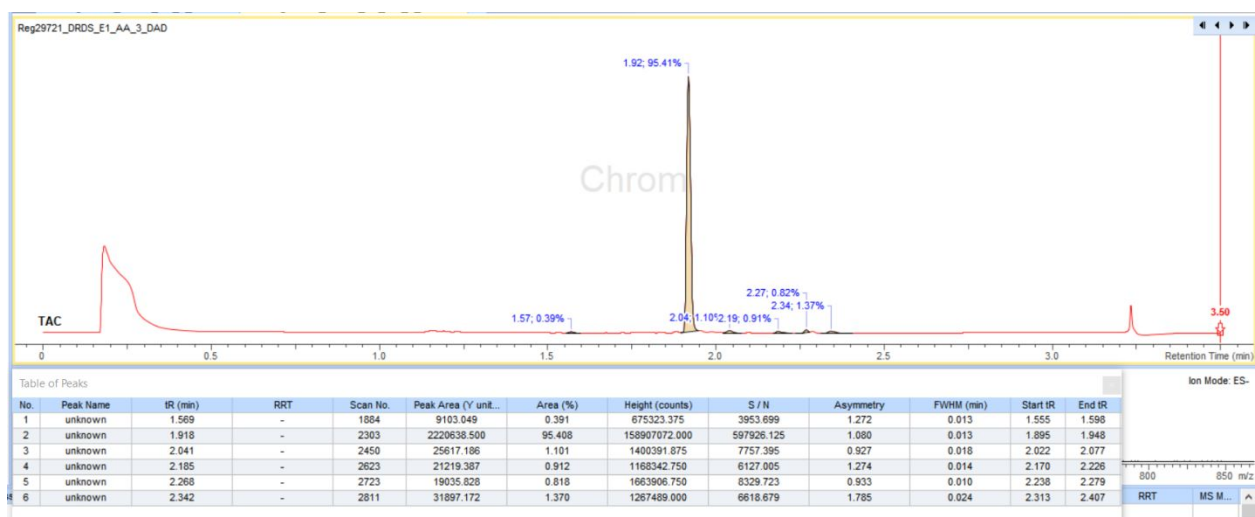

## HPLC Chromatogram

Compound **43**: Method (FA), Purity: 98.7%

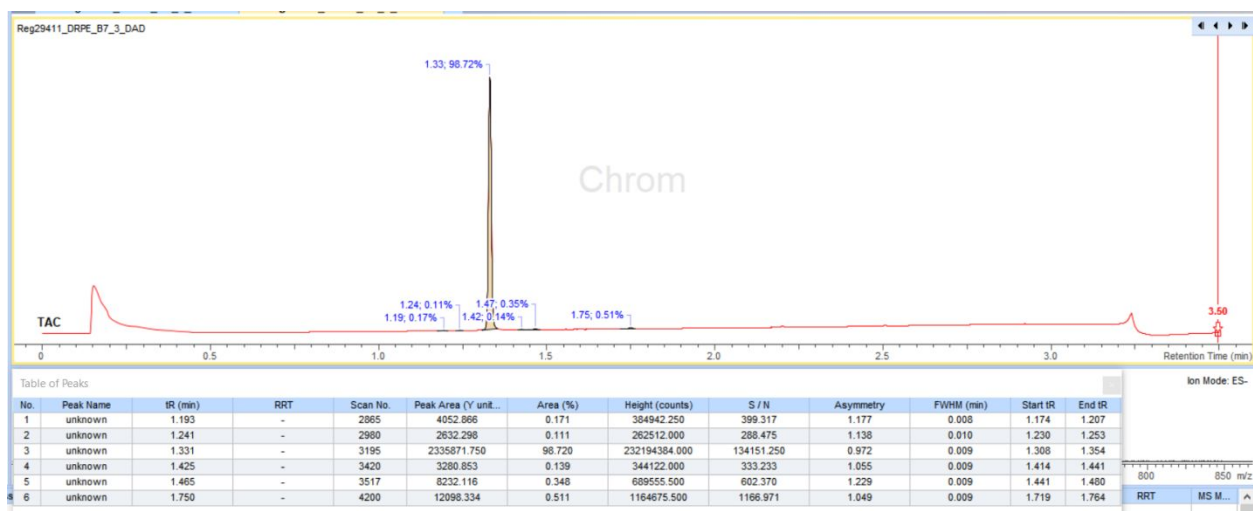

## HPLC Chromatogram

Compound **44**: Method (FA), Purity: 97.3%

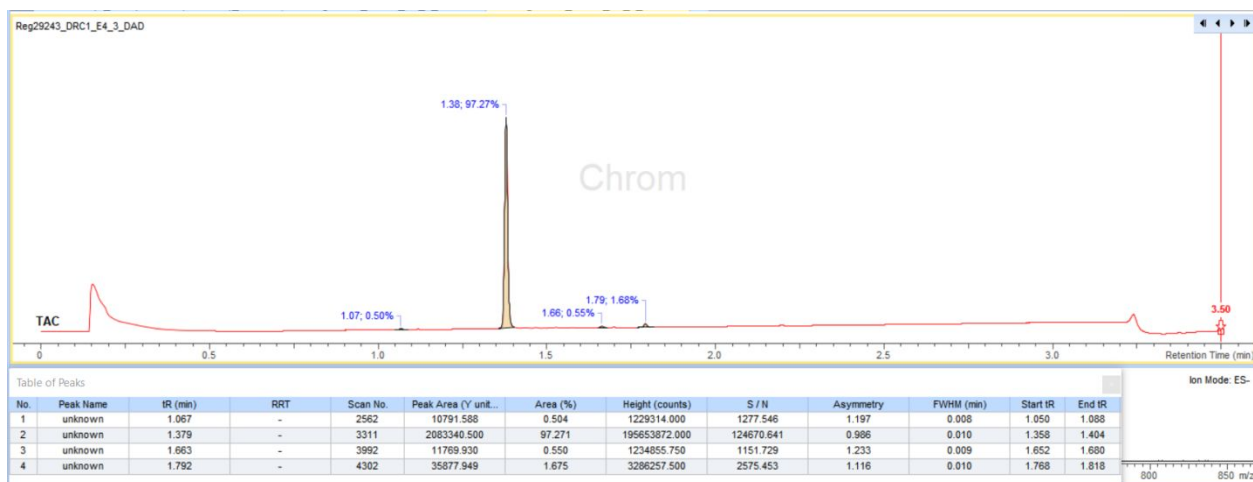

## HPLC Chromatogram

Compound **45**: Method (AA), Purity: 99.2%

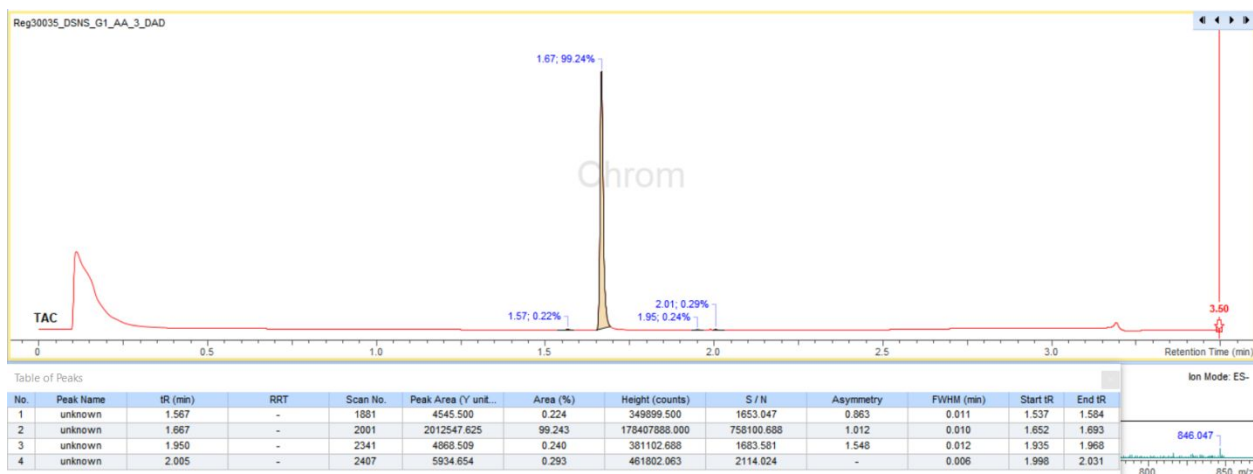

## HPLC Chromatogram

Compound **46**: Method (FA), Purity: 99.6%

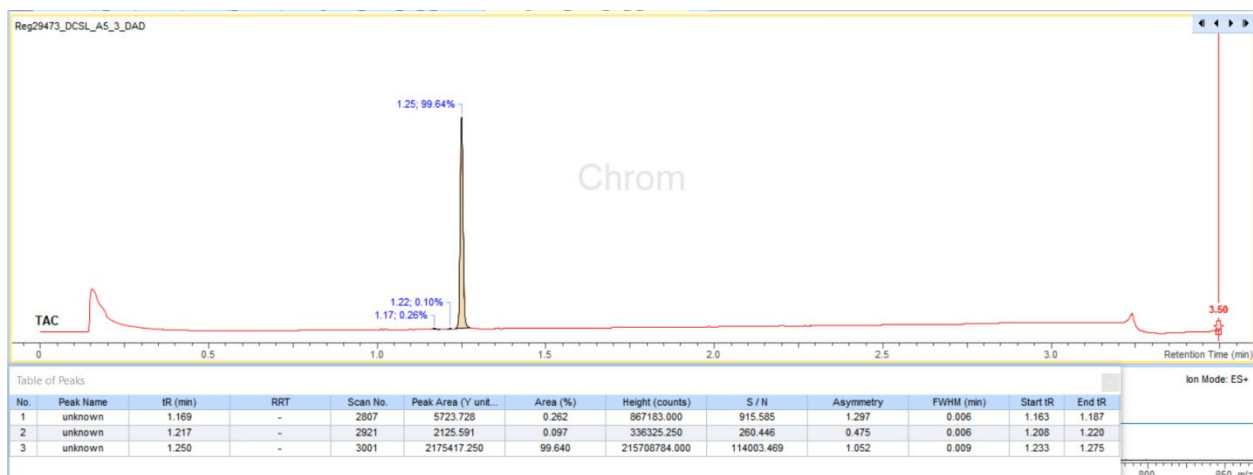

## HPLC Chromatogram

Compound **ML-93**: Method (FA), Purity: 98.5%

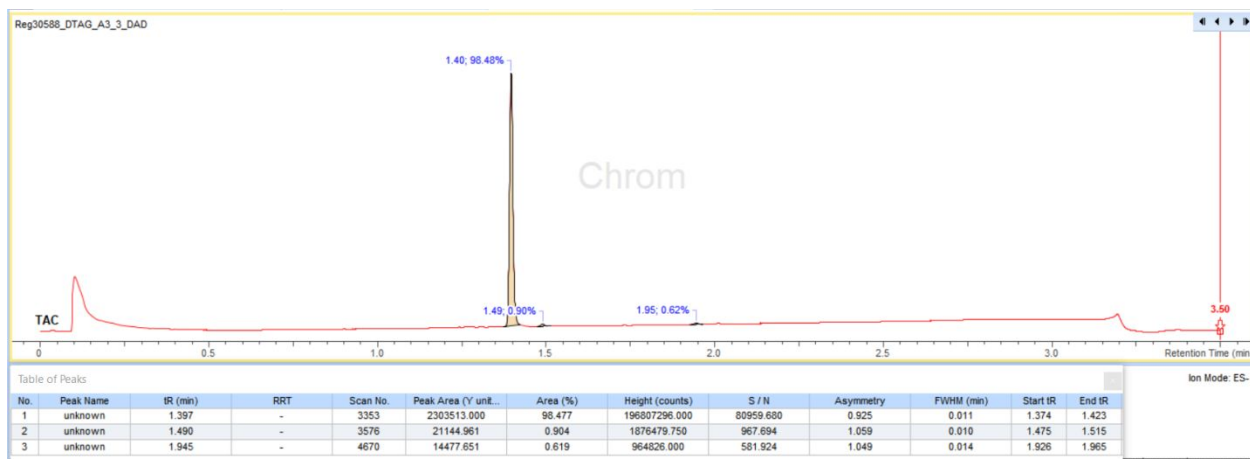

## HPLC Chromatogram

Compound **47**: Method (FA), Purity: 94.5%

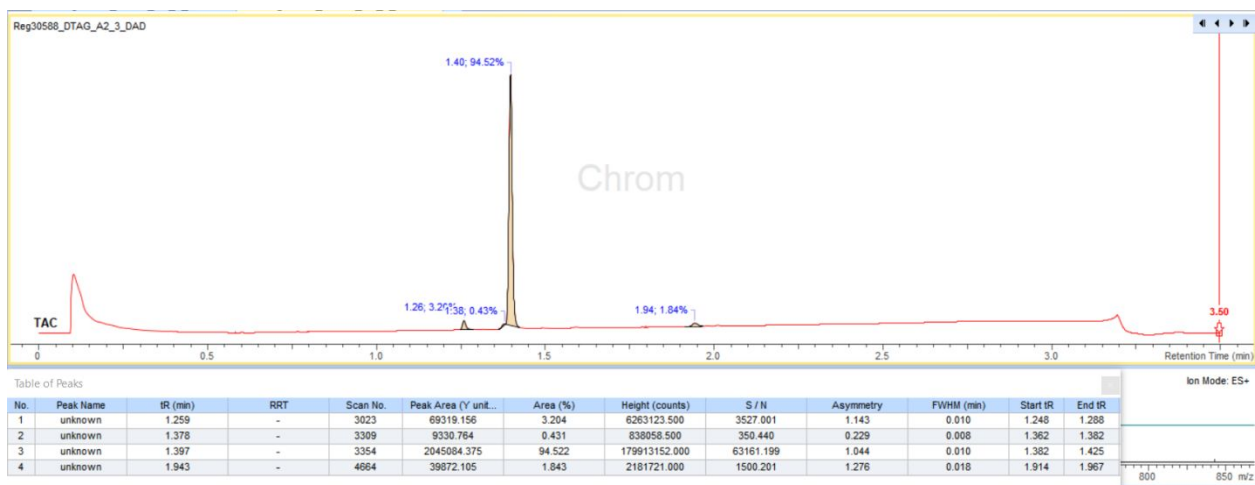

## HPLC Chromatogram

Compound **48**: Method (FA), Purity: 99.2%



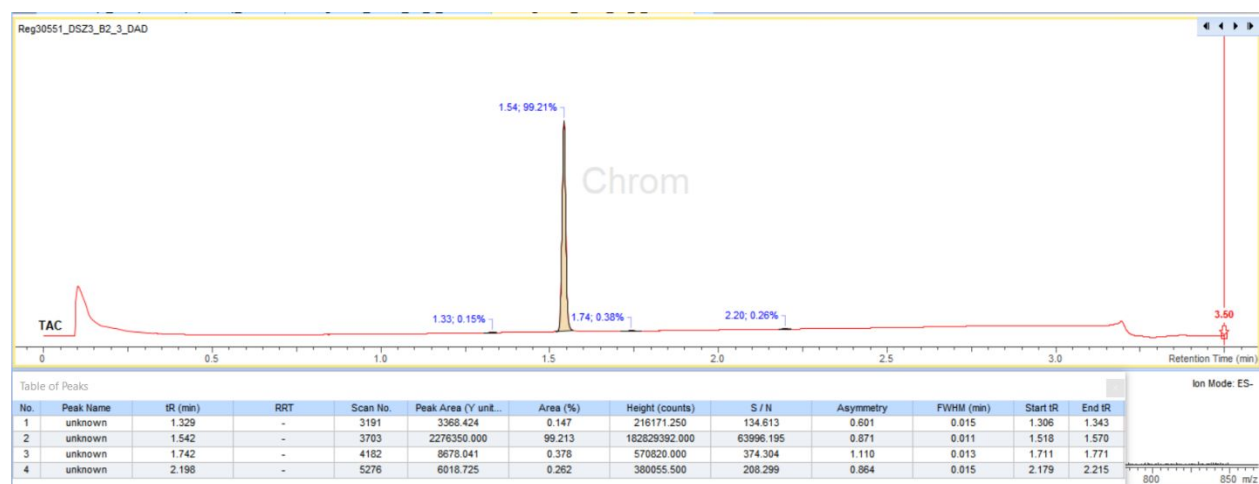

## HPLC Chromatogram

Compound **49**: Method (FA), Purity: 98.3%

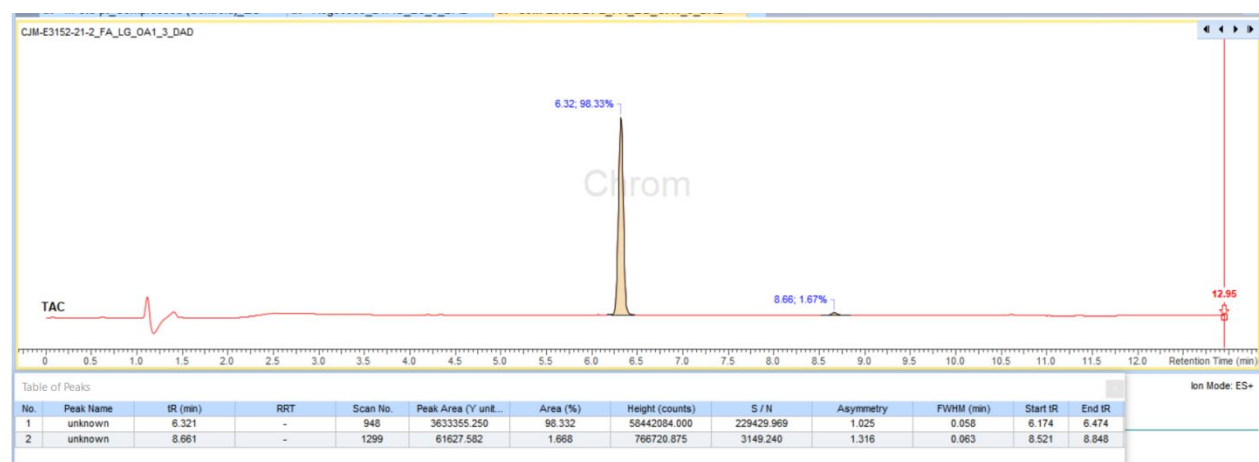

## HPLC Chromatogram

Compound **50**: Method (FA), Purity: 95.4%

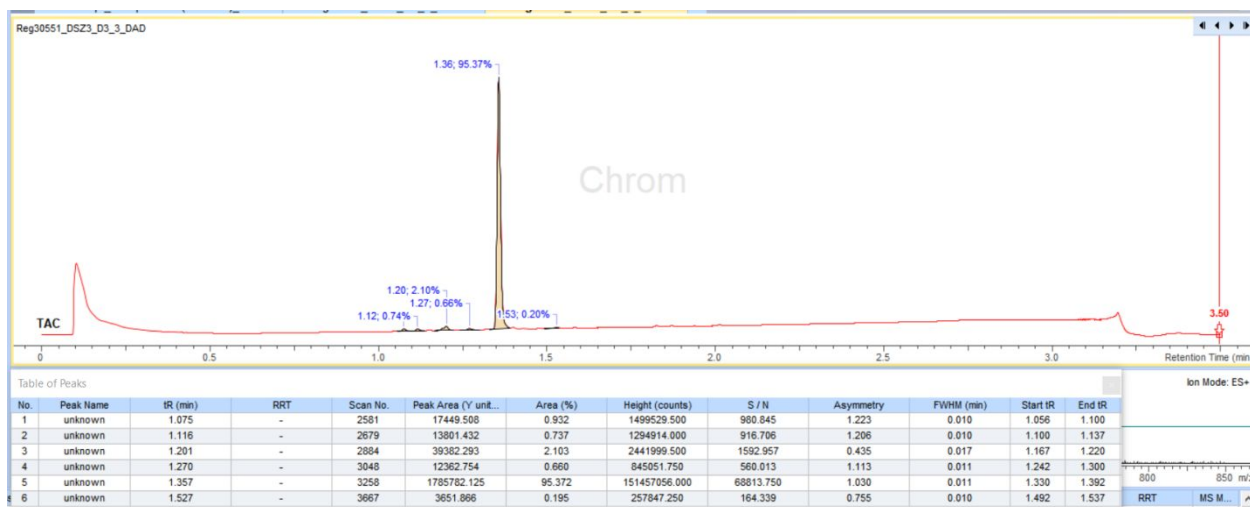

## HPLC Chromatogram

Compound **51**: Method (AA), Purity: 99.0%

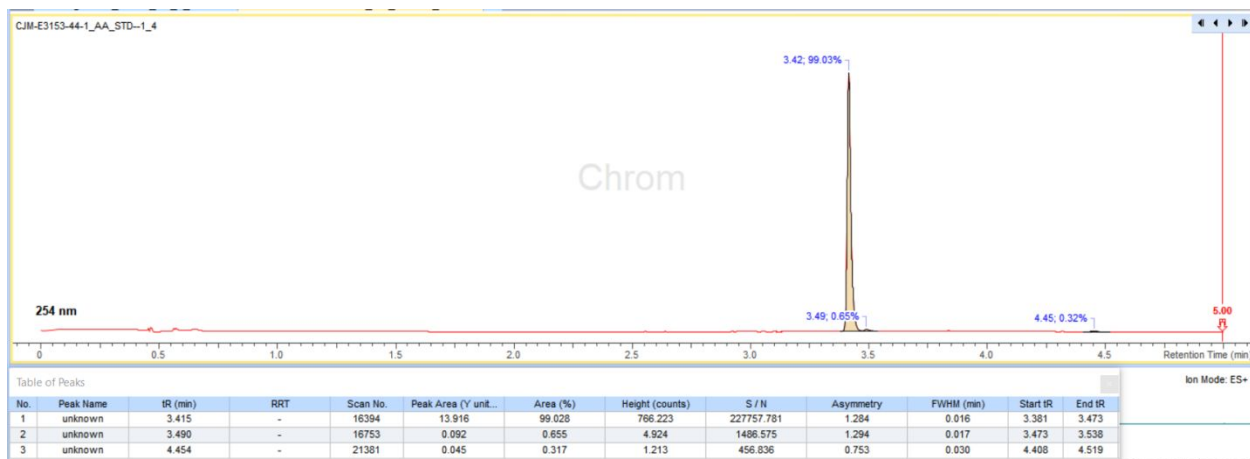

## HPLC Chromatogram

Compound **52**: Method (FA), Purity: 99.4%

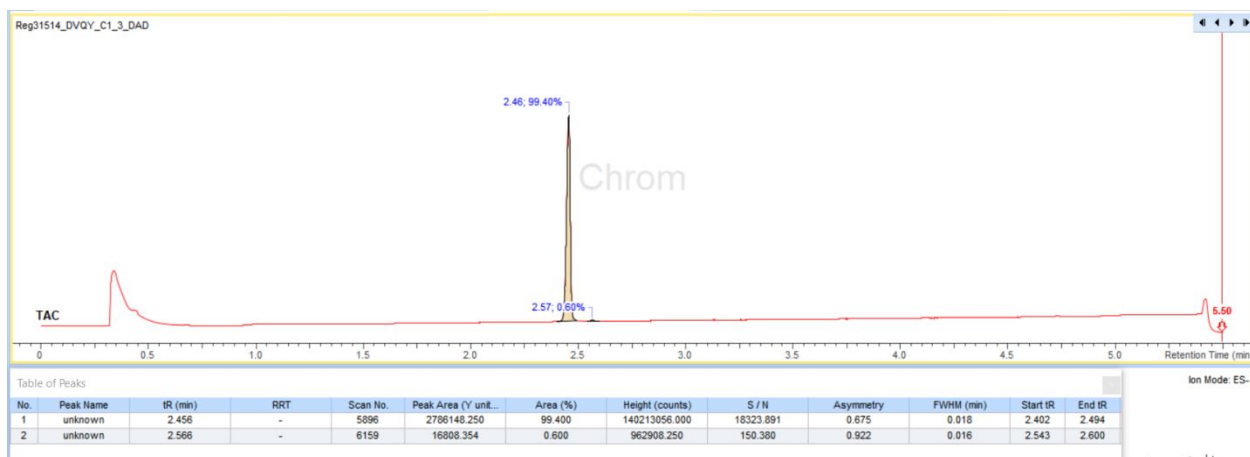

## HPLC Chromatogram

Compound **53**: Method (FA), Purity: 93.9%

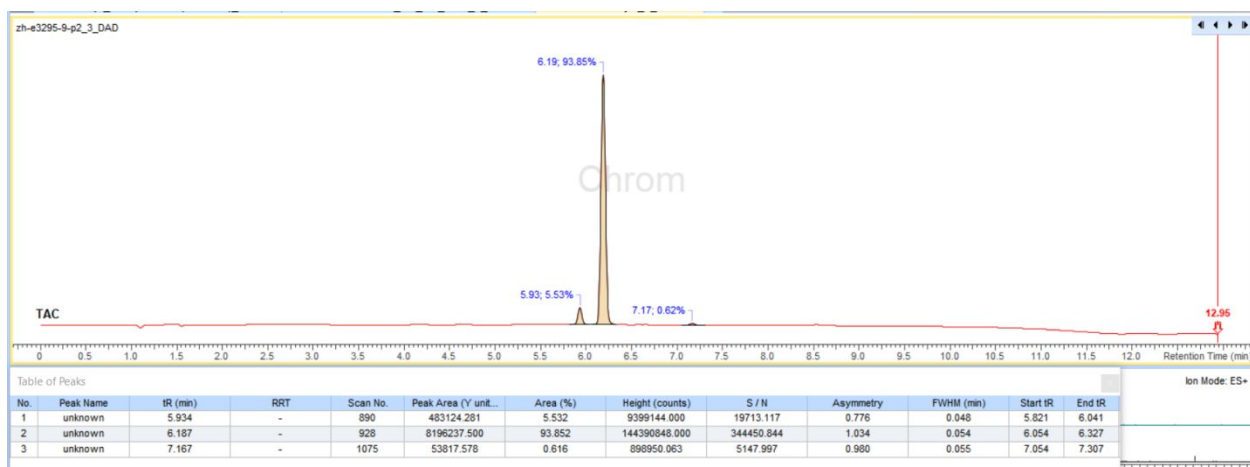

## HPLC Chromatogram

Compound **54**: Method (FA), Purity: 100%

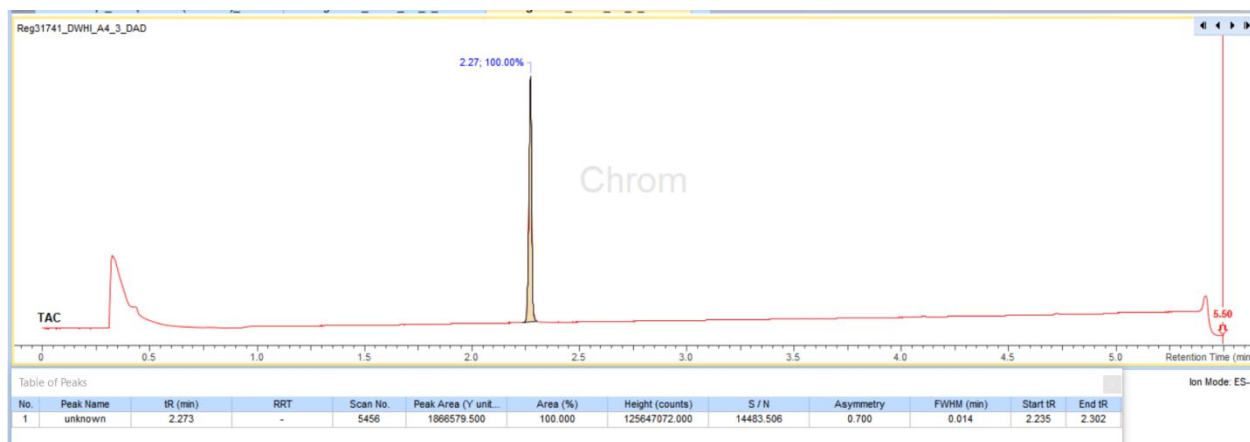

HPLC Chromatogram

Compound **55**: Method (FA), Purity: 96.7%

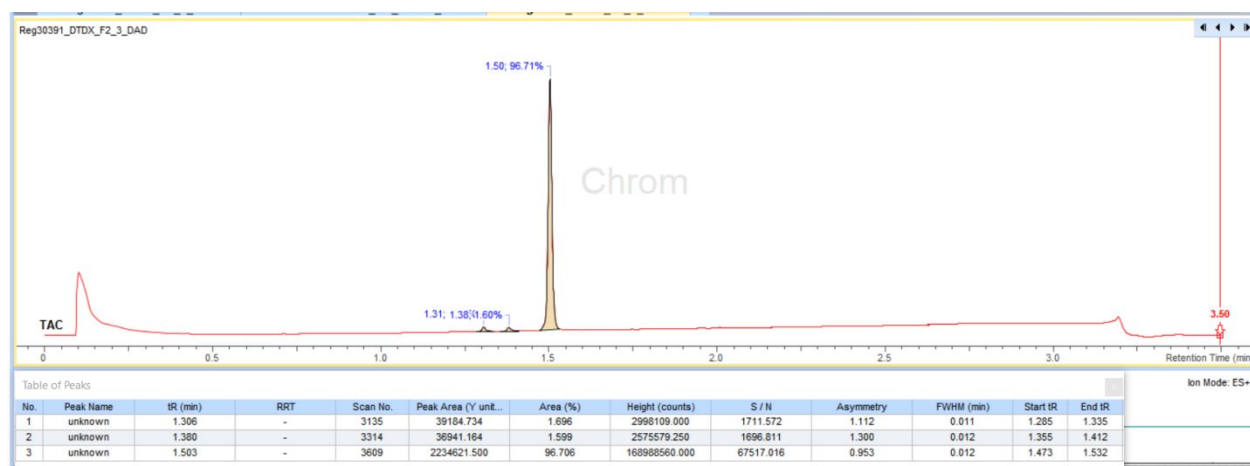

HPLC Chromatogram

Compound **TAK-981**: Method (FA), Purity: 96.8%

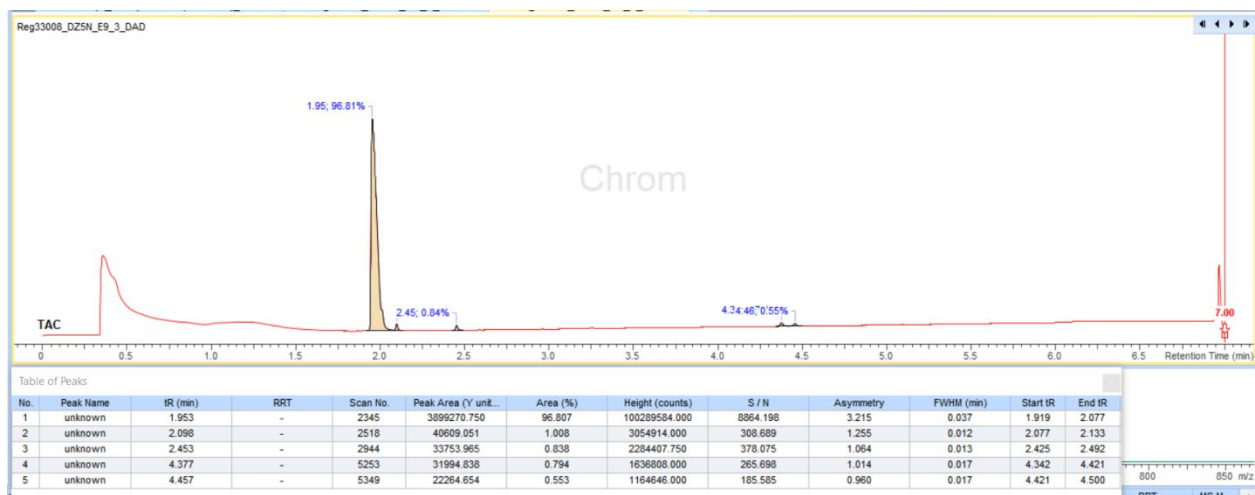

## HPLC Chromatogram

Compound **56**: Method (FA), Purity: 95.5%

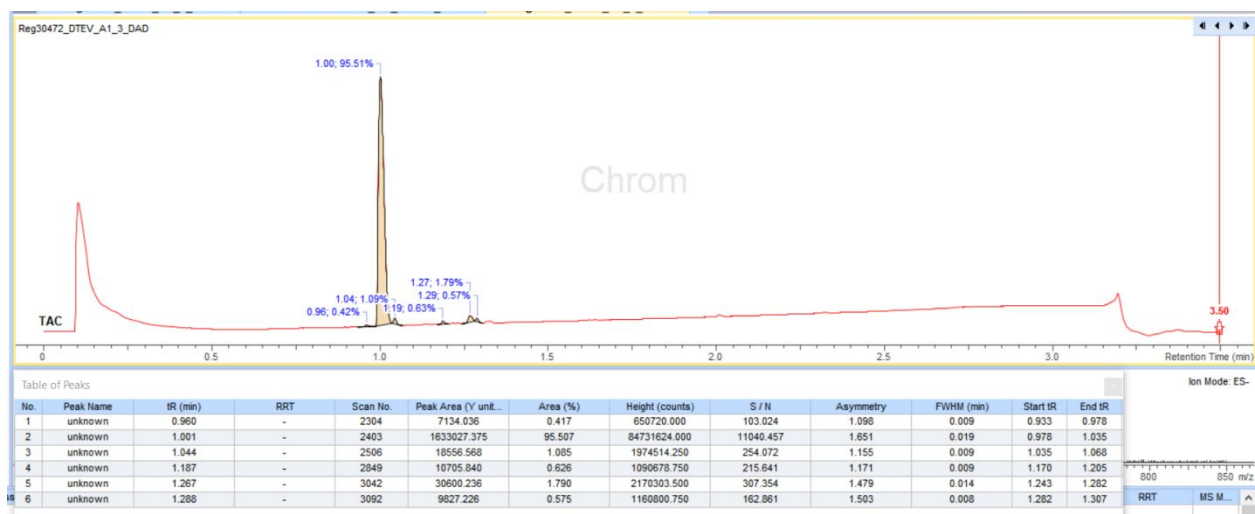

## HPLC Chromatogram

Compound **57**: Method (AA), Purity: 99.6%

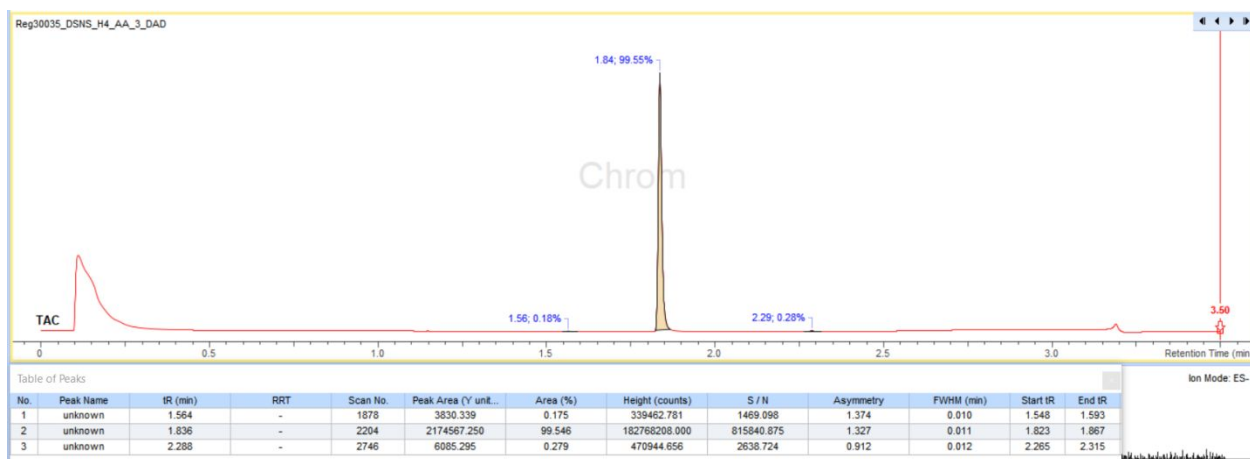

## HPLC Chromatogram

Compound **58**: Method (FA), Purity: 92.3%

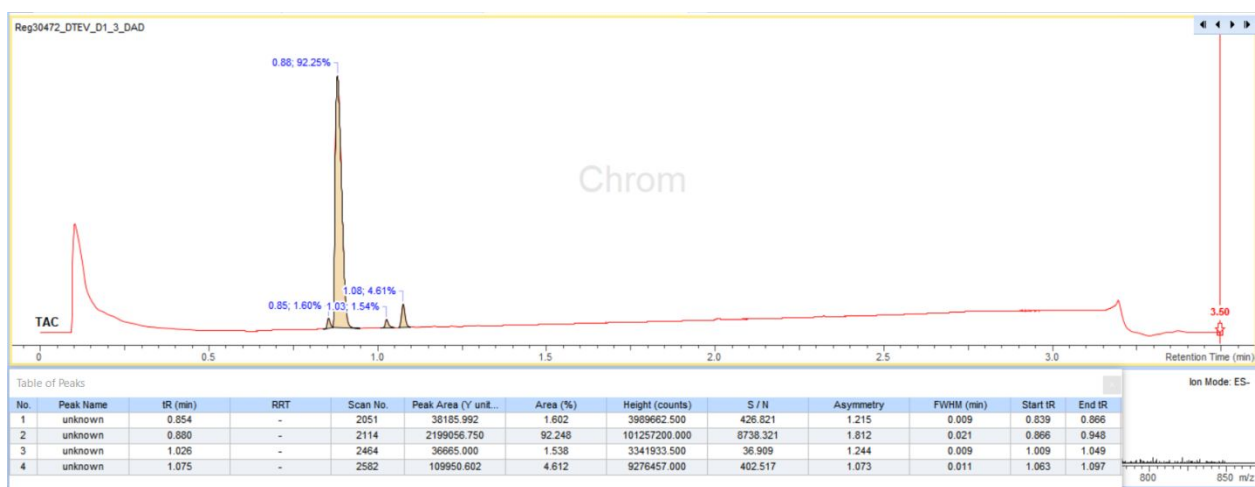

## HPLC Chromatogram

Compound **59**: Method (FA), Purity: 95.3%

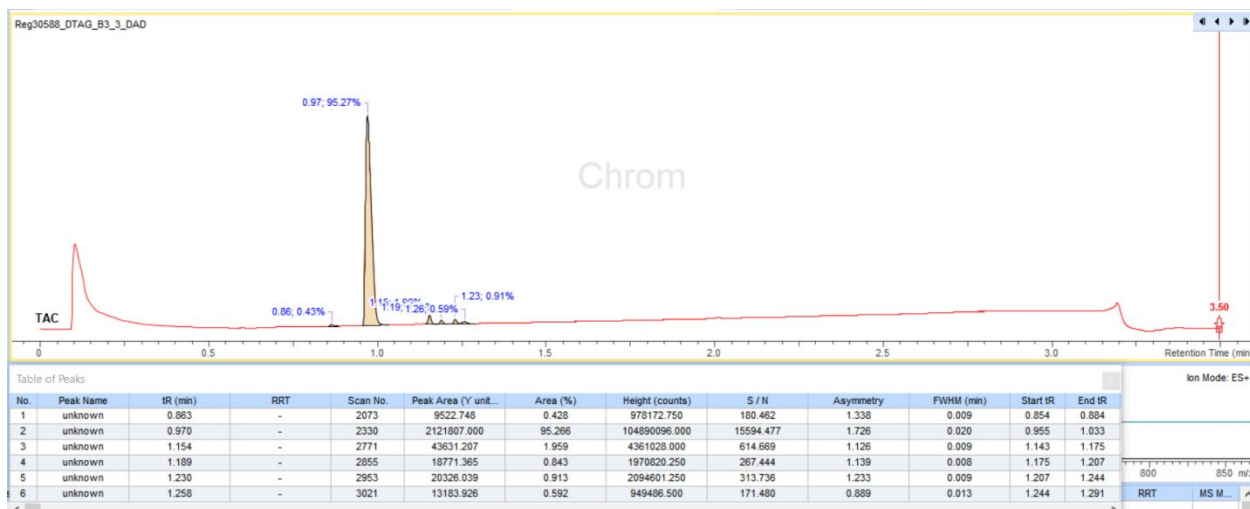

## HPLC Chromatogram

Compound **60**: Method (FA), Purity: 96.4%

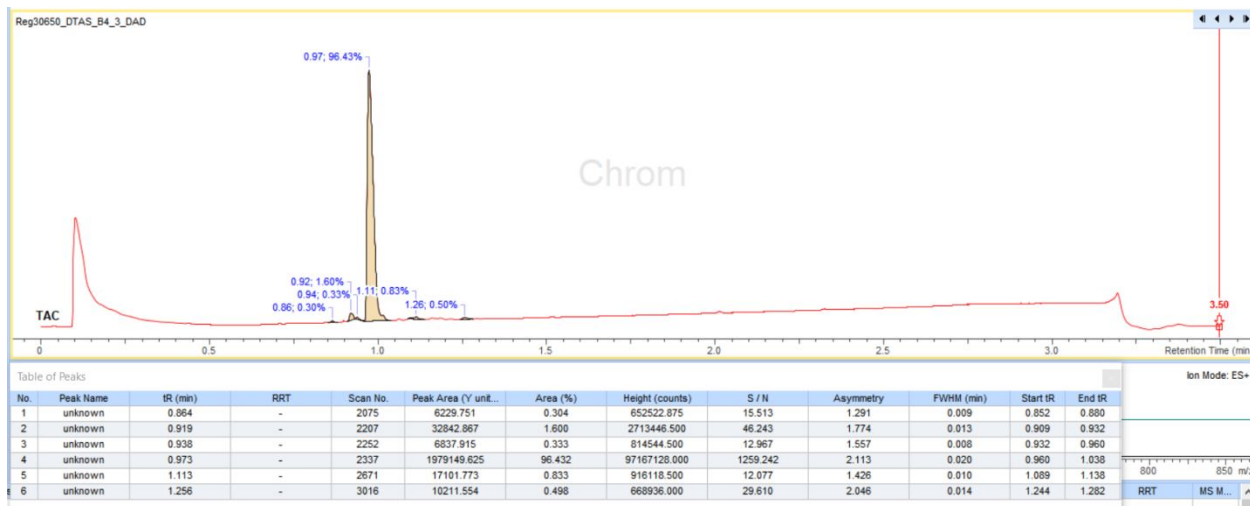

## HPLC Chromatogram

Compound **61**: Method (FA), Purity: 91.2%

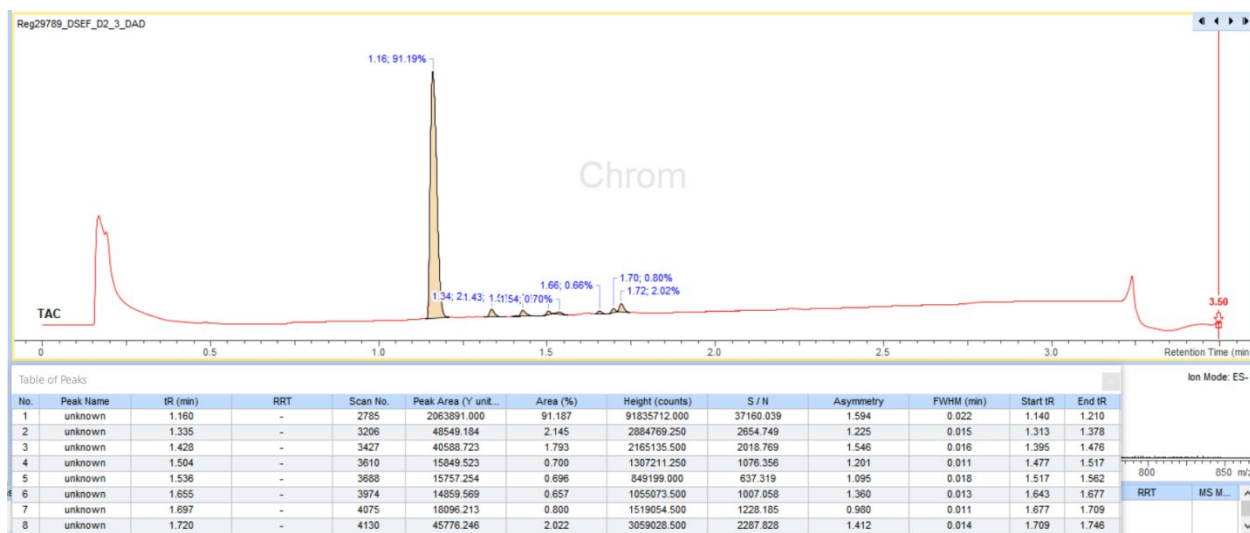

## Crystallography of SUMO-inhibitor adduct bound in SAE

Baculoviruses were made using the pDEST8 for N terminally His-tagged SAE1 (full-length construct; UniProt entry Q9UBE0) and untagged SAE2 (construct containing residues 1–550; UniProt entry Q9UBT2). Protein was expressed by coinfecting Sf9 cells and harvesting 72 hr postinfection. SAE1/2 were purified by affinity chromatography (HisTrap HP, GE Healthcare) followed by TEV protease cleavage of the His tag, ion exchange (MonoQ, GE Healthcare), and size exclusion (Superdex-200, GE Healthcare) chromatography. N-terminally His-tagged SUMO1 (full length construct; UniProt entry P63165) was cloned into pDEST8 and expressed in Sf9 cells. SUMO1 was purified by affinity (HisTrap HP) and size exclusion (Superdex-200) chromatography. Prior to crystallization, SAE1/2 was concentrated to 12 mg/ml and SUMO1 to 50 mg/ml by ultrafiltration in 10 mM Tris pH 7.5, 100 mM NaCl, 1 mM TCEP.

Crystals of SAE1/2 with SUMO1-inhibitor adducts bound were grown by mixing 50 µl SAE1/2 and 3.0 µl SUMO1 with 1.25–2.5 µl of 10 mM inhibitor, incubating for 15 minutes at 25°C, and followed by hanging-drop vapor diffusion against a reservoir containing Hampton Index 57 (50 mM BisTris, pH 6.5, 50 mM AmSulfate, 30% pentaerythritol ethoxylate) at a 1:1 ratio. Crystallization condition was used as cryoprotection and crystals were flash cooled in liquid nitrogen.

Data were collected at LRL-CAT 31ID beamline of the Advanced Photon Source and CMCF-08ID beamline at the Canadian Light Source. Data processed using HKL2000 (Z. Otwinowski and W. Minor, "Processing of X-ray Diffraction Data Collected in Oscillation Mode", *Methods in Enzymology*, Volume 276: Macromolecular Crystallography, part A, p.307-326, 1997, C.W. Carter, Jr. & R. M. Sweet, Eds., Academic Press (New York).) and XDS (Kabsch, W. *XDS. Acta Cryst. D66*, 125-132 (2010)). The structure was solved by molecular replacement using existing SAE1/2-SUMO1 coordinates (PDB entry 1Y8R) as a starting model. Manual rebuilding of the model was accomplished using the program Coot (P. Emsley, K. Cowtan Coot: model-building tools for molecular graphics, *Acta Crystallogr. D Biol. Crystallogr.*, 60 (2004), pp. 2126-213), and refinement was carried out with the CCP4i (E. Potterton, P. Briggs, M. Turkenburg, E. Dodson, A graphical user interface to the CCP4



program suite Acta Crystallogr. D Biol. Crystallogr., 59 (2003), pp. 1131-1137) graphical interface to Refmac (G.N. Murshudov, A.A. Vagin, E.J. Dodson, Refinement of macromolecular structures by the maximum-likelihood method, Acta Crystallogr. D Biol. Crystallogr., 53 (1997), pp. 240-255). The final model contains one SAE1/2:SUMO1-inhibitor complexes per asymmetric unit.

### **Micro electron diffraction of TAK-981**

Electron diffraction was performed using a Thermo Fisher Scientific (Hillsboro, Oregon) Glacios Cryo Transmission Electron Microscope (Cryo-TEM) operated at 200kV, equipped with a Ceta-D detector and operated at cryogenic temperature. Microscope data collection settings were as follows: camera length 1100mm; exposure time 222 ms; oscillation 89°/frame; dose rate ~0.1 e<sup>-</sup>/s/Å<sup>2</sup>, -193°C. Diffraction data was processed using HKL2000 (Z. Otwinowski and W. Minor, "Processing of X-ray Diffraction Data Collected in Oscillation Mode", *Methods in Enzymology*, Volume **276**: Macromolecular Crystallography, part A, p.307-326, 1997, C.W. Carter, Jr. & R. M. Sweet, Eds., Academic Press (New York)) and solved/refined with Shelx (Sheldrick, G. M. (2015). *Acta Cryst.* **C71**, 3-8.).
